# Supplementary material
Source: publisher figshare collection journal article supplement (https://diabetesjournals.figshare.com/ndownloader/files/36392007)
Supplement: Supplementary file 1 [file 36392007]

## Sheet: GO L_ATsEVc vs ATsEVko
Category	GOID	Description	GeneRatio	BgRatio	pvalue	padj	geneID	geneName	Count	Up	Up_Gene_id	Down	Down_Gene_id
BP	GO:0098542	defense response to other organism	88|1102	388|14957	4.09652e-22	2.08718e-18	ENSMUSG00000026822/ENSMUSG00000025498/ENSMUSG00000030789/ENSMUSG00000034783/ENSMUSG00000074896/ENSMUSG00000031722/ENSMUSG00000029417/ENSMUSG00000046718/ENSMUSG00000069874/ENSMUSG00000092021/ENSMUSG00000021208/ENSMUSG00000025492/ENSMUSG00000036986/ENSMUSG00000042333/ENSMUSG00000039699/ENSMUSG00000020826/ENSMUSG00000021948/ENSMUSG00000105096/ENSMUSG00000029322/ENSMUSG00000033355/ENSMUSG00000027514/…	Lcn2/Irf7/Itgax/Cd207/Ifit3/Hp/Cxcl9/Bst2/Irgm2/Gbp11/Ifi27l2b/Ifitm3/Pml/Tnfrsf14/Batf2/Nos2/Prkcd/Gbp10/Plac8/Rtp4/Zbp1/Unc93b1/Gbp2/Mx1/Lbp/Oas1a/Gbp6/Irf8/Fcgr1/Iigp1/Apobec3/Stat1/Slfn9/Stat2/Gsdmd/Gbp4/Irf1/Spn/Bcl3/Gbp3/Oasl2/Fpr2/Scd1/Cotl1/Tlr2/Gbp7/Serpinb9/Ifit1/Fgr/Dhx58/Gbp9/Tnfrsf1a/Ddx58/Isg15/Ifit3b/Cxcl10/Hmgb2/Ifit2/Myo1f/Slamf8/Ifitm2/Zc3hav1/Il17rc/Ticam1/Gbp8/Myd88/Tlr3/Fcer1…	88	83	ENSMUSG00000026822/ENSMUSG00000025498/ENSMUSG00000030789/ENSMUSG00000074896/ENSMUSG00000031722/ENSMUSG00000029417/ENSMUSG00000046718/ENSMUSG00000069874/ENSMUSG00000092021/ENSMUSG00000021208/ENSMUSG00000025492/ENSMUSG00000036986/ENSMUSG00000042333/ENSMUSG00000039699/ENSMUSG00000020826/ENSMUSG00000021948/ENSMUSG00000105096/ENSMUSG00000029322/ENSMUSG00000033355/ENSMUSG00000027514/ENSMUSG00000036908/…	5	ENSMUSG00000034783/ENSMUSG00000047123/ENSMUSG00000034292/ENSMUSG00000044583/ENSMUSG00000027249
BP	GO:0034341	response to interferon-gamma	41|1102	121|14957	1.92391e-17	4.90115e-14	ENSMUSG00000030895/ENSMUSG00000074151/ENSMUSG00000046718/ENSMUSG00000069874/ENSMUSG00000026728/ENSMUSG00000022126/ENSMUSG00000092021/ENSMUSG00000078922/ENSMUSG00000025492/ENSMUSG00000020826/ENSMUSG00000035186/ENSMUSG00000034422/ENSMUSG00000105096/ENSMUSG00000038037/ENSMUSG00000028270/ENSMUSG00000056737/ENSMUSG00000104713/ENSMUSG00000041515/ENSMUSG00000026104/ENSMUSG00000046879/ENSMUSG00000079363/…	Hpx/Nlrc5/Bst2/Irgm2/Vim/Acod1/Gbp11/Tgtp1/Ifitm3/Nos2/Ubd/Parp14/Gbp10/Socs1/Gbp2/Capg/Gbp6/Irf8/Stat1/Irgm1/Gbp4/Irf1/Gbp3/Ccl2/Jak2/Rab20/Tlr2/Gbp7/Gbp9/Ifitm2/Cd47/Gbp8/Sirpa/Eprs/Casp1/Gbp5/Ccl5/Ciita/Gch1/H2-Eb1/Flnb	41	39	ENSMUSG00000030895/ENSMUSG00000074151/ENSMUSG00000046718/ENSMUSG00000069874/ENSMUSG00000026728/ENSMUSG00000022126/ENSMUSG00000092021/ENSMUSG00000078922/ENSMUSG00000025492/ENSMUSG00000020826/ENSMUSG00000035186/ENSMUSG00000034422/ENSMUSG00000105096/ENSMUSG00000038037/ENSMUSG00000028270/ENSMUSG00000056737/ENSMUSG00000104713/ENSMUSG00000041515/ENSMUSG00000026104/ENSMUSG00000046879/ENSMUSG00000079363/…	2	ENSMUSG00000026615/ENSMUSG00000025278
BP	GO:0035456	response to interferon-beta	24|1102	52|14957	2.96318e-14	5.03247e-11	ENSMUSG00000074896/ENSMUSG00000046718/ENSMUSG00000069874/ENSMUSG00000022126/ENSMUSG00000078922/ENSMUSG00000025492/ENSMUSG00000078853/ENSMUSG00000040483/ENSMUSG00000068606/ENSMUSG00000078920/ENSMUSG00000028270/ENSMUSG00000078921/ENSMUSG00000104713/ENSMUSG00000054072/ENSMUSG00000026104/ENSMUSG00000048852/ENSMUSG00000046879/ENSMUSG00000018899/ENSMUSG00000073555/ENSMUSG00000028268/ENSMUSG00000034459/…	Ifit3/Bst2/Irgm2/Acod1/Tgtp1/Ifitm3/Igtp/Xaf1/Gm4841/Ifi47/Gbp2/Tgtp2/Gbp6/Iigp1/Stat1/Gm12185/Irgm1/Irf1/Gm4951/Gbp3/Ifit1/Ifitm2/Plscr1/Ifi202b	24	24	ENSMUSG00000074896/ENSMUSG00000046718/ENSMUSG00000069874/ENSMUSG00000022126/ENSMUSG00000078922/ENSMUSG00000025492/ENSMUSG00000078853/ENSMUSG00000040483/ENSMUSG00000068606/ENSMUSG00000078920/ENSMUSG00000028270/ENSMUSG00000078921/ENSMUSG00000104713/ENSMUSG00000054072/ENSMUSG00000026104/ENSMUSG00000048852/ENSMUSG00000046879/ENSMUSG00000018899/ENSMUSG00000073555/ENSMUSG00000028268/ENSMUSG00000034459/…	0
BP	GO:0042742	defense response to bacterium	45|1102	175|14957	5.7799e-14	7.36215e-11	ENSMUSG00000026822/ENSMUSG00000031722/ENSMUSG00000069874/ENSMUSG00000092021/ENSMUSG00000042333/ENSMUSG00000020826/ENSMUSG00000021948/ENSMUSG00000105096/ENSMUSG00000029322/ENSMUSG00000028270/ENSMUSG00000016024/ENSMUSG00000104713/ENSMUSG00000041515/ENSMUSG00000015947/ENSMUSG00000054072/ENSMUSG00000022575/ENSMUSG00000051457/ENSMUSG00000053175/ENSMUSG00000028268/ENSMUSG00000052270/ENSMUSG00000037071/…	Lcn2/Hp/Irgm2/Gbp11/Tnfrsf14/Nos2/Prkcd/Gbp10/Plac8/Gbp2/Lbp/Gbp6/Irf8/Fcgr1/Iigp1/Gsdmd/Spn/Bcl3/Gbp3/Fpr2/Scd1/Tlr2/Gbp7/Serpinb9/Fgr/Gbp9/Tnfrsf1a/Isg15/Hmgb2/Myo1f/Slamf8/Gbp8/Myd88/Fcer1g/Hck/Nod2/Mpeg1/Naip2/Pycard/Lgals9/Nlrc4/Tbk1/Hamp2/Tnfsf8/F2	45	44	ENSMUSG00000026822/ENSMUSG00000031722/ENSMUSG00000069874/ENSMUSG00000092021/ENSMUSG00000042333/ENSMUSG00000020826/ENSMUSG00000021948/ENSMUSG00000105096/ENSMUSG00000029322/ENSMUSG00000028270/ENSMUSG00000016024/ENSMUSG00000104713/ENSMUSG00000041515/ENSMUSG00000015947/ENSMUSG00000054072/ENSMUSG00000022575/ENSMUSG00000051457/ENSMUSG00000053175/ENSMUSG00000028268/ENSMUSG00000052270/ENSMUSG00000037071/…	1	ENSMUSG00000027249
BP	GO:0071346	cellular response to interferon-gamma	33|1102	101|14957	8.72887e-14	8.89472e-11	ENSMUSG00000030895/ENSMUSG00000074151/ENSMUSG00000069874/ENSMUSG00000026728/ENSMUSG00000022126/ENSMUSG00000092021/ENSMUSG00000020826/ENSMUSG00000034422/ENSMUSG00000105096/ENSMUSG00000038037/ENSMUSG00000028270/ENSMUSG00000056737/ENSMUSG00000104713/ENSMUSG00000041515/ENSMUSG00000026104/ENSMUSG00000046879/ENSMUSG00000079363/ENSMUSG00000018899/ENSMUSG00000028268/ENSMUSG00000035385/ENSMUSG00000024789/…	Hpx/Nlrc5/Irgm2/Vim/Acod1/Gbp11/Nos2/Parp14/Gbp10/Socs1/Gbp2/Capg/Gbp6/Irf8/Stat1/Irgm1/Gbp4/Irf1/Gbp3/Ccl2/Jak2/Rab20/Tlr2/Gbp7/Gbp9/Cd47/Gbp8/Sirpa/Eprs/Casp1/Gbp5/Ccl5/Flnb	33	31	ENSMUSG00000030895/ENSMUSG00000074151/ENSMUSG00000069874/ENSMUSG00000026728/ENSMUSG00000022126/ENSMUSG00000092021/ENSMUSG00000020826/ENSMUSG00000034422/ENSMUSG00000105096/ENSMUSG00000038037/ENSMUSG00000028270/ENSMUSG00000056737/ENSMUSG00000104713/ENSMUSG00000041515/ENSMUSG00000026104/ENSMUSG00000046879/ENSMUSG00000079363/ENSMUSG00000018899/ENSMUSG00000028268/ENSMUSG00000035385/ENSMUSG00000024789/…	2	ENSMUSG00000026615/ENSMUSG00000025278
BP	GO:0009615	response to virus	52|1102	241|14957	1.22647e-12	1.04148e-09	ENSMUSG00000026822/ENSMUSG00000025498/ENSMUSG00000030789/ENSMUSG00000034783/ENSMUSG00000074896/ENSMUSG00000029417/ENSMUSG00000046718/ENSMUSG00000069874/ENSMUSG00000021208/ENSMUSG00000025492/ENSMUSG00000036986/ENSMUSG00000079017/ENSMUSG00000068452/ENSMUSG00000033355/ENSMUSG00000027514/ENSMUSG00000036908/ENSMUSG00000000386/ENSMUSG00000052776/ENSMUSG00000009585/ENSMUSG00000026104/ENSMUSG00000069793/…	Lcn2/Irf7/Itgax/Cd207/Ifit3/Cxcl9/Bst2/Irgm2/Ifi27l2b/Ifitm3/Pml/Ifi27l2a/Duox2/Rtp4/Zbp1/Unc93b1/Mx1/Oas1a/Apobec3/Stat1/Slfn9/Stat2/Gbp4/Irf1/Spn/Bcl3/Oasl2/Ifit1/Dhx58/Ddx58/Isg15/Ifit3b/Cxcl10/Ifit2/Ifitm2/Zc3hav1/Ticam1/Myd88/Tlr3/Plscr1/Ddx60/Ccl5/Mx2/Oas3/Il27/Traf3ip1/Pycard/Lgals9/Tlr7/Tbk1/Cxadr/Ivns1abp	52	47	ENSMUSG00000026822/ENSMUSG00000025498/ENSMUSG00000030789/ENSMUSG00000074896/ENSMUSG00000029417/ENSMUSG00000046718/ENSMUSG00000069874/ENSMUSG00000021208/ENSMUSG00000025492/ENSMUSG00000036986/ENSMUSG00000079017/ENSMUSG00000068452/ENSMUSG00000033355/ENSMUSG00000027514/ENSMUSG00000036908/ENSMUSG00000000386/ENSMUSG00000052776/ENSMUSG00000009585/ENSMUSG00000026104/ENSMUSG00000069793/ENSMUSG00000040033/…	5	ENSMUSG00000034783/ENSMUSG00000047123/ENSMUSG00000034292/ENSMUSG00000044583/ENSMUSG00000023150
BP	GO:0035458	cellular response to interferon-beta	19|1102	43|14957	3.7784e-11	2.5954e-08	ENSMUSG00000074896/ENSMUSG00000069874/ENSMUSG00000022126/ENSMUSG00000078922/ENSMUSG00000078853/ENSMUSG00000068606/ENSMUSG00000078920/ENSMUSG00000028270/ENSMUSG00000078921/ENSMUSG00000104713/ENSMUSG00000054072/ENSMUSG00000026104/ENSMUSG00000048852/ENSMUSG00000046879/ENSMUSG00000018899/ENSMUSG00000073555/ENSMUSG00000028268/ENSMUSG00000034459/ENSMUSG00000026535	Ifit3/Irgm2/Acod1/Tgtp1/Igtp/Gm4841/Ifi47/Gbp2/Tgtp2/Gbp6/Iigp1/Stat1/Gm12185/Irgm1/Irf1/Gm4951/Gbp3/Ifit1/Ifi202b	19	19	ENSMUSG00000074896/ENSMUSG00000069874/ENSMUSG00000022126/ENSMUSG00000078922/ENSMUSG00000078853/ENSMUSG00000068606/ENSMUSG00000078920/ENSMUSG00000028270/ENSMUSG00000078921/ENSMUSG00000104713/ENSMUSG00000054072/ENSMUSG00000026104/ENSMUSG00000048852/ENSMUSG00000046879/ENSMUSG00000018899/ENSMUSG00000073555/ENSMUSG00000028268/ENSMUSG00000034459/ENSMUSG00000026535	0
BP	GO:0050727	regulation of inflammatory response	58|1102	312|14957	4.0752e-11	2.5954e-08	ENSMUSG00000078817/ENSMUSG00000026072/ENSMUSG00000022126/ENSMUSG00000055782/ENSMUSG00000022181/ENSMUSG00000030560/ENSMUSG00000020826/ENSMUSG00000049103/ENSMUSG00000032193/ENSMUSG00000037820/ENSMUSG00000039384/ENSMUSG00000016024/ENSMUSG00000030107/ENSMUSG00000015947/ENSMUSG00000020122/ENSMUSG00000035914/ENSMUSG00000032083/ENSMUSG00000037362/ENSMUSG00000004043/ENSMUSG00000023088/ENSMUSG00000051457/…	Nlrp12/Il1r1/Acod1/Abcd2/C6/Ctsc/Nos2/Ccr2/Ldlr/Tgm2/Dusp10/Lbp/Usp18/Fcgr1/Egfr/Cd276/Apoa1/Nov/Stat5a/Abcc1/Spn/Fpr2/Jak2/Tlr2/Abcd1/Ttbk1/Tnfrsf1a/S100a9/Mvk/Slamf8/Cd47/Igf1/Il17rc/Adora1/Ticam1/Sirpa/Myd88/Tlr3/Casp1/Fcer1g/Nfkb1/Fem1a/Gbp5/Nod2/Fanca/Ccl5/Vsig4/Pycard/Lgals9/Kars/Adora2a/Bst1/Stap1/Tnfaip3/Psma1/Akna/F2/Ahsg	58	45	ENSMUSG00000022126/ENSMUSG00000055782/ENSMUSG00000030560/ENSMUSG00000020826/ENSMUSG00000049103/ENSMUSG00000032193/ENSMUSG00000037820/ENSMUSG00000039384/ENSMUSG00000016024/ENSMUSG00000030107/ENSMUSG00000015947/ENSMUSG00000035914/ENSMUSG00000037362/ENSMUSG00000004043/ENSMUSG00000023088/ENSMUSG00000051457/ENSMUSG00000052270/ENSMUSG00000024789/ENSMUSG00000027995/ENSMUSG00000031378/ENSMUSG00000030341/…	13	ENSMUSG00000078817/ENSMUSG00000026072/ENSMUSG00000022181/ENSMUSG00000020122/ENSMUSG00000032083/ENSMUSG00000015599/ENSMUSG00000020053/ENSMUSG00000047123/ENSMUSG00000043683/ENSMUSG00000044206/ENSMUSG00000029254/ENSMUSG00000027249/ENSMUSG00000022868
BP	GO:0051607	defense response to virus	44|1102	203|14957	5.73714e-11	3.24786e-08	ENSMUSG00000025498/ENSMUSG00000030789/ENSMUSG00000034783/ENSMUSG00000074896/ENSMUSG00000029417/ENSMUSG00000046718/ENSMUSG00000021208/ENSMUSG00000025492/ENSMUSG00000036986/ENSMUSG00000033355/ENSMUSG00000027514/ENSMUSG00000036908/ENSMUSG00000000386/ENSMUSG00000052776/ENSMUSG00000009585/ENSMUSG00000026104/ENSMUSG00000069793/ENSMUSG00000040033/ENSMUSG00000079363/ENSMUSG00000018899/ENSMUSG00000051457/…	Irf7/Itgax/Cd207/Ifit3/Cxcl9/Bst2/Ifi27l2b/Ifitm3/Pml/Rtp4/Zbp1/Unc93b1/Mx1/Oas1a/Apobec3/Stat1/Slfn9/Stat2/Gbp4/Irf1/Spn/Oasl2/Ifit1/Dhx58/Ddx58/Isg15/Ifit3b/Cxcl10/Ifit2/Ifitm2/Zc3hav1/Ticam1/Tlr3/Plscr1/Ddx60/Ccl5/Mx2/Oas3/Il27/Traf3ip1/Pycard/Tlr7/Tbk1/Cxadr	44	40	ENSMUSG00000025498/ENSMUSG00000030789/ENSMUSG00000074896/ENSMUSG00000029417/ENSMUSG00000046718/ENSMUSG00000021208/ENSMUSG00000025492/ENSMUSG00000036986/ENSMUSG00000033355/ENSMUSG00000027514/ENSMUSG00000036908/ENSMUSG00000000386/ENSMUSG00000052776/ENSMUSG00000009585/ENSMUSG00000026104/ENSMUSG00000069793/ENSMUSG00000040033/ENSMUSG00000079363/ENSMUSG00000018899/ENSMUSG00000051457/ENSMUSG00000029561/…	4	ENSMUSG00000034783/ENSMUSG00000047123/ENSMUSG00000034292/ENSMUSG00000044583
BP	GO:0050867	positive regulation of cell activation	54|1102	296|14957	3.98733e-10	2.03154e-07	ENSMUSG00000068220/ENSMUSG00000042333/ENSMUSG00000030560/ENSMUSG00000049103/ENSMUSG00000039217/ENSMUSG00000038037/ENSMUSG00000039384/ENSMUSG00000016024/ENSMUSG00000035914/ENSMUSG00000004043/ENSMUSG00000039323/ENSMUSG00000025314/ENSMUSG00000018899/ENSMUSG00000051457/ENSMUSG00000035385/ENSMUSG00000041471/ENSMUSG00000024789/ENSMUSG00000115338/ENSMUSG00000015599/ENSMUSG00000016496/ENSMUSG00000028874/…	Lgals1/Tnfrsf14/Ctsc/Ccr2/Il18/Socs1/Dusp10/Lbp/Cd276/Stat5a/Igfbp2/Ptprj/Irf1/Spn/Ccl2/Shld2/Jak2/Pnp/Ttbk1/Cd274/Fgr/Gas6/Cd1d1/Jak3/Il7/Sash3/Itgb2/Cd47/Rasgrp1/Bcl10/Igf1/Ticam1/Icosl/Coro1a/Sirpa/Myd88/Aif1/Plek/Tnfsf13b/Fcer1g/Nod2/Ccl5/Pycard/Lgals9/Kars/Cd5/Hsp90aa1/Bst1/Ulbp1/Hps1/Stap1/H2-DMa/Malt1/Rps6ka1	54	48	ENSMUSG00000068220/ENSMUSG00000042333/ENSMUSG00000030560/ENSMUSG00000049103/ENSMUSG00000039217/ENSMUSG00000038037/ENSMUSG00000039384/ENSMUSG00000016024/ENSMUSG00000035914/ENSMUSG00000004043/ENSMUSG00000025314/ENSMUSG00000018899/ENSMUSG00000051457/ENSMUSG00000035385/ENSMUSG00000024789/ENSMUSG00000115338/ENSMUSG00000016496/ENSMUSG00000028874/ENSMUSG00000031451/ENSMUSG00000028076/ENSMUSG00000031805/…	6	ENSMUSG00000039323/ENSMUSG00000041471/ENSMUSG00000015599/ENSMUSG00000020053/ENSMUSG00000047123/ENSMUSG00000029254
BP	GO:0001819	positive regulation of cytokine production	66|1102	402|14957	4.92989e-10	2.15203e-07	ENSMUSG00000025498/ENSMUSG00000026072/ENSMUSG00000042333/ENSMUSG00000049103/ENSMUSG00000039217/ENSMUSG00000036908/ENSMUSG00000016024/ENSMUSG00000029915/ENSMUSG00000041515/ENSMUSG00000026104/ENSMUSG00000035914/ENSMUSG00000022575/ENSMUSG00000004043/ENSMUSG00000025314/ENSMUSG00000018899/ENSMUSG00000051457/ENSMUSG00000031934/ENSMUSG00000053175/ENSMUSG00000035385/ENSMUSG00000024789/ENSMUSG00000027995/…	Irf7/Il1r1/Tnfrsf14/Ccr2/Il18/Unc93b1/Lbp/Clec5a/Irf8/Stat1/Cd276/Gsdmd/Stat5a/Ptprj/Irf1/Spn/Panx1/Bcl3/Ccl2/Jak2/Tlr2/Cd274/Fgr/Dhx58/Cd14/Tnfrsf1a/Hspb1/Ddx58/Cd1d1/Afap1l2/Hmgb2/Il7/Flot1/Sash3/Zc3hav1/Rasgrp1/Bcl10/Nlrp1b/Il17rc/Ticam1/Icosl/Myd88/Aif1/Tlr3/Casp1/Plcg2/Fcer1g/Gbp5/Ddx60/Nod2/Stat3/Ccl5/Tlr1/Il27/Hk1/Il1rap/Pycard/Lgals9/Kars/Tlr7/Ulbp1/Il1rn/Tbk1/Cyp2j6/Malt1/Hpse	66	61	ENSMUSG00000025498/ENSMUSG00000042333/ENSMUSG00000049103/ENSMUSG00000039217/ENSMUSG00000036908/ENSMUSG00000016024/ENSMUSG00000029915/ENSMUSG00000041515/ENSMUSG00000026104/ENSMUSG00000035914/ENSMUSG00000022575/ENSMUSG00000004043/ENSMUSG00000025314/ENSMUSG00000018899/ENSMUSG00000051457/ENSMUSG00000031934/ENSMUSG00000053175/ENSMUSG00000035385/ENSMUSG00000024789/ENSMUSG00000027995/ENSMUSG00000016496/…	5	ENSMUSG00000026072/ENSMUSG00000047123/ENSMUSG00000022514/ENSMUSG00000044583/ENSMUSG00000052914
BP	GO:0071219	cellular response to molecule of bacterial origin	39|1102	178|14957	5.06856e-10	2.15203e-07	ENSMUSG00000029417/ENSMUSG00000069874/ENSMUSG00000026728/ENSMUSG00000022126/ENSMUSG00000020826/ENSMUSG00000020638/ENSMUSG00000105096/ENSMUSG00000021624/ENSMUSG00000039217/ENSMUSG00000028270/ENSMUSG00000016024/ENSMUSG00000104713/ENSMUSG00000041515/ENSMUSG00000026104/ENSMUSG00000035385/ENSMUSG00000024789/ENSMUSG00000027995/ENSMUSG00000016496/ENSMUSG00000015243/ENSMUSG00000051439/ENSMUSG00000034855/…	Cxcl9/Irgm2/Vim/Acod1/Nos2/Cmpk2/Gbp10/Cd180/Il18/Gbp2/Lbp/Gbp6/Irf8/Stat1/Ccl2/Jak2/Tlr2/Cd274/Abca1/Cd14/Cxcl10/Bcl10/Ticam1/Sirpa/Myd88/Casp1/Plscr1/Nfkb1/Akap8/Nod2/Ccl5/Tlr1/Pycard/Il1rn/Gch1/Stap1/Tnfaip3/Fcgr4/Malt1	39	35	ENSMUSG00000029417/ENSMUSG00000069874/ENSMUSG00000026728/ENSMUSG00000022126/ENSMUSG00000020826/ENSMUSG00000020638/ENSMUSG00000105096/ENSMUSG00000021624/ENSMUSG00000039217/ENSMUSG00000028270/ENSMUSG00000016024/ENSMUSG00000104713/ENSMUSG00000041515/ENSMUSG00000026104/ENSMUSG00000035385/ENSMUSG00000024789/ENSMUSG00000027995/ENSMUSG00000016496/ENSMUSG00000051439/ENSMUSG00000034855/ENSMUSG00000028191/…	4	ENSMUSG00000015243/ENSMUSG00000047123/ENSMUSG00000024045/ENSMUSG00000029254
BP	GO:0007159	leukocyte cell-cell adhesion	53|1102	291|14957	6.1748e-10	2.42005e-07	ENSMUSG00000031628/ENSMUSG00000068220/ENSMUSG00000042333/ENSMUSG00000049103/ENSMUSG00000037405/ENSMUSG00000032080/ENSMUSG00000039217/ENSMUSG00000027009/ENSMUSG00000038037/ENSMUSG00000039384/ENSMUSG00000021451/ENSMUSG00000031594/ENSMUSG00000035914/ENSMUSG00000004043/ENSMUSG00000039323/ENSMUSG00000018899/ENSMUSG00000051457/ENSMUSG00000035385/ENSMUSG00000115338/ENSMUSG00000031207/ENSMUSG00000024942/…	Casp3/Lgals1/Tnfrsf14/Ccr2/Icam1/Apoa4/Il18/Itga4/Socs1/Dusp10/Sema4d/Fgl1/Cd276/Stat5a/Igfbp2/Irf1/Spn/Ccl2/Pnp/Msn/Capn1/Cd274/S100a9/Cd1d1/Jak3/Il7/Olr1/Zc3h12d/Sash3/Itgb2/Cd47/Rasgrp1/Bcl10/Igf1/Fermt3/Icosl/Coro1a/Sirpa/Aif1/Tnfsf13b/Lgals3/Rac2/Ccl5/Vsig4/Slfn1/Pycard/Lgals9/Cd5/Adora2a/Hsp90aa1/H2-DMa/Malt1/Gpnmb	53	48	ENSMUSG00000031628/ENSMUSG00000068220/ENSMUSG00000042333/ENSMUSG00000049103/ENSMUSG00000037405/ENSMUSG00000039217/ENSMUSG00000027009/ENSMUSG00000038037/ENSMUSG00000039384/ENSMUSG00000021451/ENSMUSG00000031594/ENSMUSG00000035914/ENSMUSG00000004043/ENSMUSG00000018899/ENSMUSG00000051457/ENSMUSG00000035385/ENSMUSG00000115338/ENSMUSG00000031207/ENSMUSG00000024942/ENSMUSG00000016496/ENSMUSG00000056071/…	5	ENSMUSG00000032080/ENSMUSG00000039323/ENSMUSG00000020053/ENSMUSG00000044206/ENSMUSG00000029816
BP	GO:0060326	cell chemotaxis	48|1102	253|14957	9.81925e-10	3.5735e-07	ENSMUSG00000040026/ENSMUSG00000057465/ENSMUSG00000074115/ENSMUSG00000022425/ENSMUSG00000036585/ENSMUSG00000029417/ENSMUSG00000021948/ENSMUSG00000049103/ENSMUSG00000016024/ENSMUSG00000037362/ENSMUSG00000029032/ENSMUSG00000023088/ENSMUSG00000025314/ENSMUSG00000035385/ENSMUSG00000052270/ENSMUSG00000026271/ENSMUSG00000031451/ENSMUSG00000056071/ENSMUSG00000004951/ENSMUSG00000034855/ENSMUSG00000050350/…	Saa3/Saa2/Saa1/Enpp2/Fgf1/Cxcl9/Prkcd/Ccr2/Lbp/Nov/Arhgef16/Abcc1/Ptprj/Ccl2/Fpr2/Gpr35/Gas6/S100a9/Hspb1/Cxcl10/Gpr18/Hmgb2/Slamf8/Slc37a4/Pla2g7/Itgb2/Il17rc/Coro1a/Aif1/Lgals3/Fcer1g/Rac2/Csf3r/Nod2/Cyp7b1/Ccl5/Kars/Arhgef5/Ccr1/Bst1/Ptpro/Il1rn/Cxadr/Stap1/Camk1d/Slc8b1/Rhog/Ackr2	48	42	ENSMUSG00000040026/ENSMUSG00000057465/ENSMUSG00000074115/ENSMUSG00000029417/ENSMUSG00000021948/ENSMUSG00000049103/ENSMUSG00000016024/ENSMUSG00000037362/ENSMUSG00000029032/ENSMUSG00000023088/ENSMUSG00000025314/ENSMUSG00000035385/ENSMUSG00000052270/ENSMUSG00000026271/ENSMUSG00000031451/ENSMUSG00000056071/ENSMUSG00000004951/ENSMUSG00000034855/ENSMUSG00000050350/ENSMUSG00000054717/ENSMUSG00000053318/…	6	ENSMUSG00000022425/ENSMUSG00000036585/ENSMUSG00000032114/ENSMUSG00000023913/ENSMUSG00000039519/ENSMUSG00000029254
BP	GO:0050900	leukocyte migration	53|1102	298|14957	1.49129e-09	5.06542e-07	ENSMUSG00000078817/ENSMUSG00000029417/ENSMUSG00000026072/ENSMUSG00000042333/ENSMUSG00000049103/ENSMUSG00000037405/ENSMUSG00000027009/ENSMUSG00000016024/ENSMUSG00000037362/ENSMUSG00000025314/ENSMUSG00000051457/ENSMUSG00000035385/ENSMUSG00000052270/ENSMUSG00000027995/ENSMUSG00000031207/ENSMUSG00000026271/ENSMUSG00000024942/ENSMUSG00000031451/ENSMUSG00000056071/ENSMUSG00000034855/ENSMUSG00000050350/…	Nlrp12/Cxcl9/Il1r1/Tnfrsf14/Ccr2/Icam1/Itga4/Lbp/Nov/Ptprj/Spn/Ccl2/Fpr2/Tlr2/Msn/Gpr35/Capn1/Gas6/S100a9/Cxcl10/Gpr18/Slamf8/Slc37a4/Pla2g7/Itgb2/Cd47/Emilin1/Il17rc/Adora1/Coro1a/Sirpa/Myd88/Aif1/Lgals3/Myo1g/Fcer1g/Rac2/Csf3r/Nod2/Cyp7b1/Ccl5/Pycard/Lgals9/Kars/Arhgef5/Ccr1/Bst1/Ptpro/Il1rn/Cxadr/Stap1/Camk1d/Slc8b1	53	47	ENSMUSG00000029417/ENSMUSG00000042333/ENSMUSG00000049103/ENSMUSG00000037405/ENSMUSG00000027009/ENSMUSG00000016024/ENSMUSG00000037362/ENSMUSG00000025314/ENSMUSG00000051457/ENSMUSG00000035385/ENSMUSG00000052270/ENSMUSG00000027995/ENSMUSG00000031207/ENSMUSG00000026271/ENSMUSG00000024942/ENSMUSG00000031451/ENSMUSG00000056071/ENSMUSG00000034855/ENSMUSG00000050350/ENSMUSG00000053318/ENSMUSG00000000290/…	6	ENSMUSG00000078817/ENSMUSG00000026072/ENSMUSG00000032114/ENSMUSG00000023913/ENSMUSG00000039519/ENSMUSG00000029254
BP	GO:0071222	cellular response to lipopolysaccharide	37|1102	170|14957	1.71166e-09	5.25244e-07	ENSMUSG00000029417/ENSMUSG00000069874/ENSMUSG00000026728/ENSMUSG00000022126/ENSMUSG00000020826/ENSMUSG00000020638/ENSMUSG00000105096/ENSMUSG00000021624/ENSMUSG00000039217/ENSMUSG00000028270/ENSMUSG00000016024/ENSMUSG00000104713/ENSMUSG00000041515/ENSMUSG00000026104/ENSMUSG00000035385/ENSMUSG00000024789/ENSMUSG00000016496/ENSMUSG00000015243/ENSMUSG00000051439/ENSMUSG00000034855/ENSMUSG00000028191/…	Cxcl9/Irgm2/Vim/Acod1/Nos2/Cmpk2/Gbp10/Cd180/Il18/Gbp2/Lbp/Gbp6/Irf8/Stat1/Ccl2/Jak2/Cd274/Abca1/Cd14/Cxcl10/Bcl10/Ticam1/Sirpa/Myd88/Casp1/Plscr1/Nfkb1/Akap8/Nod2/Ccl5/Pycard/Il1rn/Gch1/Stap1/Tnfaip3/Fcgr4/Malt1	37	33	ENSMUSG00000029417/ENSMUSG00000069874/ENSMUSG00000026728/ENSMUSG00000022126/ENSMUSG00000020826/ENSMUSG00000020638/ENSMUSG00000105096/ENSMUSG00000021624/ENSMUSG00000039217/ENSMUSG00000028270/ENSMUSG00000016024/ENSMUSG00000104713/ENSMUSG00000041515/ENSMUSG00000026104/ENSMUSG00000035385/ENSMUSG00000024789/ENSMUSG00000016496/ENSMUSG00000051439/ENSMUSG00000034855/ENSMUSG00000028191/ENSMUSG00000037902/…	4	ENSMUSG00000015243/ENSMUSG00000047123/ENSMUSG00000024045/ENSMUSG00000029254
BP	GO:0042089	cytokine biosynthetic process	29|1102	113|14957	1.82452e-09	5.25244e-07	ENSMUSG00000025498/ENSMUSG00000078817/ENSMUSG00000049103/ENSMUSG00000039217/ENSMUSG00000016024/ENSMUSG00000025494/ENSMUSG00000002325/ENSMUSG00000035914/ENSMUSG00000004043/ENSMUSG00000018899/ENSMUSG00000051457/ENSMUSG00000053175/ENSMUSG00000024789/ENSMUSG00000027995/ENSMUSG00000004951/ENSMUSG00000028076/ENSMUSG00000006014/ENSMUSG00000028191/ENSMUSG00000047123/ENSMUSG00000000732/ENSMUSG00000032508/…	Irf7/Nlrp12/Ccr2/Il18/Lbp/Sigirr/Irf9/Cd276/Stat5a/Irf1/Spn/Bcl3/Jak2/Tlr2/Hspb1/Cd1d1/Prg4/Bcl10/Ticam1/Icosl/Myd88/Tlr3/Nfkb1/Stat3/Tlr1/Il27/Il1rap/Tlr7/Tbk1	29	25	ENSMUSG00000025498/ENSMUSG00000049103/ENSMUSG00000039217/ENSMUSG00000016024/ENSMUSG00000025494/ENSMUSG00000002325/ENSMUSG00000035914/ENSMUSG00000004043/ENSMUSG00000018899/ENSMUSG00000051457/ENSMUSG00000053175/ENSMUSG00000024789/ENSMUSG00000027995/ENSMUSG00000004951/ENSMUSG00000028076/ENSMUSG00000006014/ENSMUSG00000028191/ENSMUSG00000000732/ENSMUSG00000032508/ENSMUSG00000031639/ENSMUSG00000028163/…	4	ENSMUSG00000078817/ENSMUSG00000047123/ENSMUSG00000022514/ENSMUSG00000044583
BP	GO:0045088	regulation of innate immune response	49|1102	266|14957	1.85562e-09	5.25244e-07	ENSMUSG00000046688/ENSMUSG00000025498/ENSMUSG00000030895/ENSMUSG00000074151/ENSMUSG00000069874/ENSMUSG00000022126/ENSMUSG00000042726/ENSMUSG00000034422/ENSMUSG00000038037/ENSMUSG00000027514/ENSMUSG00000036908/ENSMUSG00000039384/ENSMUSG00000016024/ENSMUSG00000004043/ENSMUSG00000046879/ENSMUSG00000018899/ENSMUSG00000037321/ENSMUSG00000052270/ENSMUSG00000027995/ENSMUSG00000045827/ENSMUSG00000028874/…	Tifa/Irf7/Hpx/Nlrc5/Irgm2/Acod1/Trafd1/Parp14/Socs1/Zbp1/Unc93b1/Dusp10/Lbp/Stat5a/Irgm1/Irf1/Tap1/Fpr2/Tlr2/Serpinb9/Fgr/Clec2d/Dhx58/Cd14/Ddx58/Hmgb2/Myo1f/Slamf8/Flot1/Zc3hav1/Rasgrp1/Bcl10/Ticam1/Myd88/Tlr3/Plscr1/Gbp5/Ddx60/Nod2/Vsig4/Tlr1/Pycard/Lgals9/Ccr1/Tlr7/Ulbp1/Nlrc4/Tbk1/Tnfaip3	49	46	ENSMUSG00000046688/ENSMUSG00000025498/ENSMUSG00000030895/ENSMUSG00000074151/ENSMUSG00000069874/ENSMUSG00000022126/ENSMUSG00000042726/ENSMUSG00000034422/ENSMUSG00000038037/ENSMUSG00000027514/ENSMUSG00000036908/ENSMUSG00000039384/ENSMUSG00000016024/ENSMUSG00000004043/ENSMUSG00000046879/ENSMUSG00000018899/ENSMUSG00000037321/ENSMUSG00000052270/ENSMUSG00000027995/ENSMUSG00000045827/ENSMUSG00000028874/…	3	ENSMUSG00000047123/ENSMUSG00000044206/ENSMUSG00000044583
BP	GO:0050865	regulation of cell activation	75|1102	500|14957	2.19591e-09	5.88851e-07	ENSMUSG00000031628/ENSMUSG00000068220/ENSMUSG00000042333/ENSMUSG00000030560/ENSMUSG00000021948/ENSMUSG00000032350/ENSMUSG00000049103/ENSMUSG00000032193/ENSMUSG00000039217/ENSMUSG00000023249/ENSMUSG00000038037/ENSMUSG00000039384/ENSMUSG00000016024/ENSMUSG00000031594/ENSMUSG00000035914/ENSMUSG00000004043/ENSMUSG00000039323/ENSMUSG00000025314/ENSMUSG00000018899/ENSMUSG00000051457/ENSMUSG00000024778/…	Casp3/Lgals1/Tnfrsf14/Ctsc/Prkcd/Gclc/Ccr2/Ldlr/Il18/Parp3/Socs1/Dusp10/Lbp/Fgl1/Cd276/Stat5a/Igfbp2/Ptprj/Irf1/Spn/Fas/Ccl2/Shld2/Jak2/Pnp/Ttbk1/Cd274/Fgr/Gas6/Cd1d1/Jak3/Il7/Slamf8/Zc3h12d/Sash3/Itgb2/Cd47/Emilin1/Rasgrp1/Bcl10/Igf1/Ticam1/Icosl/Coro1a/Sirpa/Myd88/Aif1/Plek/Braf/Tnfsf13b/Lgals3/Fcer1g/Plscr1/Rac2/Nod2/Fanca/Ccl5/Vsig4/Slfn1/Il27/Pycard/Lgals9/Kars/Cd5/Adora2a/Hsp90aa1/Bst1/Ulbp…	75	66	ENSMUSG00000031628/ENSMUSG00000068220/ENSMUSG00000042333/ENSMUSG00000030560/ENSMUSG00000021948/ENSMUSG00000032350/ENSMUSG00000049103/ENSMUSG00000032193/ENSMUSG00000039217/ENSMUSG00000023249/ENSMUSG00000038037/ENSMUSG00000039384/ENSMUSG00000016024/ENSMUSG00000031594/ENSMUSG00000035914/ENSMUSG00000004043/ENSMUSG00000025314/ENSMUSG00000018899/ENSMUSG00000051457/ENSMUSG00000024778/ENSMUSG00000035385/…	9	ENSMUSG00000039323/ENSMUSG00000041471/ENSMUSG00000015599/ENSMUSG00000020053/ENSMUSG00000047123/ENSMUSG00000002413/ENSMUSG00000044206/ENSMUSG00000029254/ENSMUSG00000029816
BP	GO:0050830	defense response to Gram-positive bacterium	22|1102	70|14957	2.74996e-09	7.00553e-07	ENSMUSG00000092021/ENSMUSG00000042333/ENSMUSG00000105096/ENSMUSG00000028270/ENSMUSG00000016024/ENSMUSG00000104713/ENSMUSG00000022575/ENSMUSG00000028268/ENSMUSG00000037071/ENSMUSG00000027995/ENSMUSG00000040253/ENSMUSG00000028874/ENSMUSG00000029298/ENSMUSG00000054717/ENSMUSG00000024300/ENSMUSG00000034438/ENSMUSG00000032508/ENSMUSG00000003283/ENSMUSG00000055994/ENSMUSG00000046805/ENSMUSG00000020115/…	Gbp11/Tnfrsf14/Gbp10/Gbp2/Lbp/Gbp6/Gsdmd/Gbp3/Scd1/Tlr2/Gbp7/Fgr/Gbp9/Hmgb2/Myo1f/Gbp8/Myd88/Hck/Nod2/Mpeg1/Tbk1/Tnfsf8	22	22	ENSMUSG00000092021/ENSMUSG00000042333/ENSMUSG00000105096/ENSMUSG00000028270/ENSMUSG00000016024/ENSMUSG00000104713/ENSMUSG00000022575/ENSMUSG00000028268/ENSMUSG00000037071/ENSMUSG00000027995/ENSMUSG00000040253/ENSMUSG00000028874/ENSMUSG00000029298/ENSMUSG00000054717/ENSMUSG00000024300/ENSMUSG00000034438/ENSMUSG00000032508/ENSMUSG00000003283/ENSMUSG00000055994/ENSMUSG00000046805/ENSMUSG00000020115/…	0
BP	GO:0042107	cytokine metabolic process	29|1102	116|14957	3.51776e-09	8.53476e-07	ENSMUSG00000025498/ENSMUSG00000078817/ENSMUSG00000049103/ENSMUSG00000039217/ENSMUSG00000016024/ENSMUSG00000025494/ENSMUSG00000002325/ENSMUSG00000035914/ENSMUSG00000004043/ENSMUSG00000018899/ENSMUSG00000051457/ENSMUSG00000053175/ENSMUSG00000024789/ENSMUSG00000027995/ENSMUSG00000004951/ENSMUSG00000028076/ENSMUSG00000006014/ENSMUSG00000028191/ENSMUSG00000047123/ENSMUSG00000000732/ENSMUSG00000032508/…	Irf7/Nlrp12/Ccr2/Il18/Lbp/Sigirr/Irf9/Cd276/Stat5a/Irf1/Spn/Bcl3/Jak2/Tlr2/Hspb1/Cd1d1/Prg4/Bcl10/Ticam1/Icosl/Myd88/Tlr3/Nfkb1/Stat3/Tlr1/Il27/Il1rap/Tlr7/Tbk1	29	25	ENSMUSG00000025498/ENSMUSG00000049103/ENSMUSG00000039217/ENSMUSG00000016024/ENSMUSG00000025494/ENSMUSG00000002325/ENSMUSG00000035914/ENSMUSG00000004043/ENSMUSG00000018899/ENSMUSG00000051457/ENSMUSG00000053175/ENSMUSG00000024789/ENSMUSG00000027995/ENSMUSG00000004951/ENSMUSG00000028076/ENSMUSG00000006014/ENSMUSG00000028191/ENSMUSG00000000732/ENSMUSG00000032508/ENSMUSG00000031639/ENSMUSG00000028163/…	4	ENSMUSG00000078817/ENSMUSG00000047123/ENSMUSG00000022514/ENSMUSG00000044583
BP	GO:0002696	positive regulation of leukocyte activation	50|1102	281|14957	4.28244e-09	9.91774e-07	ENSMUSG00000068220/ENSMUSG00000042333/ENSMUSG00000030560/ENSMUSG00000049103/ENSMUSG00000039217/ENSMUSG00000038037/ENSMUSG00000039384/ENSMUSG00000016024/ENSMUSG00000035914/ENSMUSG00000004043/ENSMUSG00000039323/ENSMUSG00000018899/ENSMUSG00000051457/ENSMUSG00000035385/ENSMUSG00000041471/ENSMUSG00000115338/ENSMUSG00000015599/ENSMUSG00000016496/ENSMUSG00000028874/ENSMUSG00000031451/ENSMUSG00000028076/…	Lgals1/Tnfrsf14/Ctsc/Ccr2/Il18/Socs1/Dusp10/Lbp/Cd276/Stat5a/Igfbp2/Irf1/Spn/Ccl2/Shld2/Pnp/Ttbk1/Cd274/Fgr/Gas6/Cd1d1/Jak3/Il7/Sash3/Itgb2/Cd47/Rasgrp1/Bcl10/Igf1/Ticam1/Icosl/Coro1a/Sirpa/Myd88/Aif1/Tnfsf13b/Fcer1g/Nod2/Ccl5/Pycard/Lgals9/Kars/Cd5/Hsp90aa1/Bst1/Ulbp1/Hps1/Stap1/H2-DMa/Malt1	50	44	ENSMUSG00000068220/ENSMUSG00000042333/ENSMUSG00000030560/ENSMUSG00000049103/ENSMUSG00000039217/ENSMUSG00000038037/ENSMUSG00000039384/ENSMUSG00000016024/ENSMUSG00000035914/ENSMUSG00000004043/ENSMUSG00000018899/ENSMUSG00000051457/ENSMUSG00000035385/ENSMUSG00000115338/ENSMUSG00000016496/ENSMUSG00000028874/ENSMUSG00000031451/ENSMUSG00000028076/ENSMUSG00000031805/ENSMUSG00000040329/ENSMUSG00000031101/…	6	ENSMUSG00000039323/ENSMUSG00000041471/ENSMUSG00000015599/ENSMUSG00000020053/ENSMUSG00000047123/ENSMUSG00000029254
BP	GO:0006953	acute-phase response	15|1102	34|14957	4.5554e-09	1.00912e-06	ENSMUSG00000040026/ENSMUSG00000057465/ENSMUSG00000074115/ENSMUSG00000061540/ENSMUSG00000031722/ENSMUSG00000008845/ENSMUSG00000016024/ENSMUSG00000025494/ENSMUSG00000039196/ENSMUSG00000032369/ENSMUSG00000004040/ENSMUSG00000035042/ENSMUSG00000026981/ENSMUSG00000027249/ENSMUSG00000022868	Saa3/Saa2/Saa1/Orm2/Hp/Cd163/Lbp/Sigirr/Orm1/Plscr1/Stat3/Ccl5/Il1rn/F2/Ahsg	15	12	ENSMUSG00000040026/ENSMUSG00000057465/ENSMUSG00000074115/ENSMUSG00000061540/ENSMUSG00000031722/ENSMUSG00000016024/ENSMUSG00000025494/ENSMUSG00000039196/ENSMUSG00000032369/ENSMUSG00000004040/ENSMUSG00000035042/ENSMUSG00000026981	3	ENSMUSG00000008845/ENSMUSG00000027249/ENSMUSG00000022868
BP	GO:1903039	positive regulation of leukocyte cell-cell adhesion	38|1102	186|14957	6.70719e-09	1.42388e-06	ENSMUSG00000068220/ENSMUSG00000042333/ENSMUSG00000049103/ENSMUSG00000037405/ENSMUSG00000039217/ENSMUSG00000027009/ENSMUSG00000038037/ENSMUSG00000039384/ENSMUSG00000035914/ENSMUSG00000004043/ENSMUSG00000039323/ENSMUSG00000018899/ENSMUSG00000051457/ENSMUSG00000035385/ENSMUSG00000115338/ENSMUSG00000024942/ENSMUSG00000016496/ENSMUSG00000028076/ENSMUSG00000031805/ENSMUSG00000040329/ENSMUSG00000031101/…	Lgals1/Tnfrsf14/Ccr2/Icam1/Il18/Itga4/Socs1/Dusp10/Cd276/Stat5a/Igfbp2/Irf1/Spn/Ccl2/Pnp/Capn1/Cd274/Cd1d1/Jak3/Il7/Sash3/Itgb2/Cd47/Rasgrp1/Bcl10/Igf1/Icosl/Coro1a/Sirpa/Aif1/Tnfsf13b/Ccl5/Pycard/Lgals9/Cd5/Hsp90aa1/H2-DMa/Malt1	38	36	ENSMUSG00000068220/ENSMUSG00000042333/ENSMUSG00000049103/ENSMUSG00000037405/ENSMUSG00000039217/ENSMUSG00000027009/ENSMUSG00000038037/ENSMUSG00000039384/ENSMUSG00000035914/ENSMUSG00000004043/ENSMUSG00000018899/ENSMUSG00000051457/ENSMUSG00000035385/ENSMUSG00000115338/ENSMUSG00000024942/ENSMUSG00000016496/ENSMUSG00000028076/ENSMUSG00000031805/ENSMUSG00000040329/ENSMUSG00000031101/ENSMUSG00000000290/…	2	ENSMUSG00000039323/ENSMUSG00000020053
BP	GO:1902652	secondary alcohol metabolic process	29|1102	121|14957	9.93352e-09	2.02445e-06	ENSMUSG00000074115/ENSMUSG00000036585/ENSMUSG00000045294/ENSMUSG00000032018/ENSMUSG00000032080/ENSMUSG00000032193/ENSMUSG00000003123/ENSMUSG00000041567/ENSMUSG00000044254/ENSMUSG00000031594/ENSMUSG00000032083/ENSMUSG00000023022/ENSMUSG00000024799/ENSMUSG00000022351/ENSMUSG00000015243/ENSMUSG00000028603/ENSMUSG00000027952/ENSMUSG00000041939/ENSMUSG00000034088/ENSMUSG00000021252/ENSMUSG00000027875/…	Saa1/Fgf1/Insig1/Sc5d/Apoa4/Ldlr/Lipe/Serpina12/Pcsk9/Fgl1/Apoa1/Lima1/Tm7sf2/Sqle/Abca1/Scp2/Pmvk/Mvk/Hdlbp/Erg28/Hmgcs2/Cyp2r1/Angptl3/Lbr/Nsdhl/Hmgcs1/Mttp/Cyp7b1/Apoa5	29	17	ENSMUSG00000074115/ENSMUSG00000045294/ENSMUSG00000032018/ENSMUSG00000032193/ENSMUSG00000003123/ENSMUSG00000044254/ENSMUSG00000031594/ENSMUSG00000023022/ENSMUSG00000024799/ENSMUSG00000022351/ENSMUSG00000027952/ENSMUSG00000041939/ENSMUSG00000021252/ENSMUSG00000030670/ENSMUSG00000004880/ENSMUSG00000031349/ENSMUSG00000093930	12	ENSMUSG00000036585/ENSMUSG00000032080/ENSMUSG00000041567/ENSMUSG00000032083/ENSMUSG00000015243/ENSMUSG00000028603/ENSMUSG00000034088/ENSMUSG00000027875/ENSMUSG00000028553/ENSMUSG00000028158/ENSMUSG00000039519/ENSMUSG00000032079
BP	GO:0032606	type I interferon production	23|1102	82|14957	1.39352e-08	2.71861e-06	ENSMUSG00000025498/ENSMUSG00000022126/ENSMUSG00000026104/ENSMUSG00000002325/ENSMUSG00000002983/ENSMUSG00000079363/ENSMUSG00000018899/ENSMUSG00000027995/ENSMUSG00000017830/ENSMUSG00000051439/ENSMUSG00000040296/ENSMUSG00000054717/ENSMUSG00000059714/ENSMUSG00000029826/ENSMUSG00000047123/ENSMUSG00000037902/ENSMUSG00000032508/ENSMUSG00000031639/ENSMUSG00000034330/ENSMUSG00000034292/ENSMUSG00000030793/…	Irf7/Acod1/Stat1/Irf9/Relb/Gbp4/Irf1/Tlr2/Dhx58/Cd14/Ddx58/Hmgb2/Flot1/Zc3hav1/Ticam1/Sirpa/Myd88/Tlr3/Plcg2/Traf3ip1/Pycard/Tlr7/Tbk1	23	20	ENSMUSG00000025498/ENSMUSG00000022126/ENSMUSG00000026104/ENSMUSG00000002325/ENSMUSG00000002983/ENSMUSG00000079363/ENSMUSG00000018899/ENSMUSG00000027995/ENSMUSG00000017830/ENSMUSG00000051439/ENSMUSG00000040296/ENSMUSG00000054717/ENSMUSG00000059714/ENSMUSG00000029826/ENSMUSG00000037902/ENSMUSG00000032508/ENSMUSG00000031639/ENSMUSG00000034330/ENSMUSG00000030793/ENSMUSG00000020115	3	ENSMUSG00000047123/ENSMUSG00000034292/ENSMUSG00000044583
BP	GO:0071216	cellular response to biotic stimulus	39|1102	199|14957	1.44068e-08	2.71861e-06	ENSMUSG00000029417/ENSMUSG00000069874/ENSMUSG00000026728/ENSMUSG00000022126/ENSMUSG00000020826/ENSMUSG00000020638/ENSMUSG00000105096/ENSMUSG00000021624/ENSMUSG00000039217/ENSMUSG00000028270/ENSMUSG00000016024/ENSMUSG00000104713/ENSMUSG00000041515/ENSMUSG00000026104/ENSMUSG00000035385/ENSMUSG00000024789/ENSMUSG00000027995/ENSMUSG00000016496/ENSMUSG00000015243/ENSMUSG00000051439/ENSMUSG00000034855/…	Cxcl9/Irgm2/Vim/Acod1/Nos2/Cmpk2/Gbp10/Cd180/Il18/Gbp2/Lbp/Gbp6/Irf8/Stat1/Ccl2/Jak2/Tlr2/Cd274/Abca1/Cd14/Cxcl10/Bcl10/Ticam1/Sirpa/Myd88/Casp1/Plscr1/Nfkb1/Akap8/Nod2/Ccl5/Tlr1/Pycard/Il1rn/Gch1/Stap1/Tnfaip3/Fcgr4/Malt1	39	35	ENSMUSG00000029417/ENSMUSG00000069874/ENSMUSG00000026728/ENSMUSG00000022126/ENSMUSG00000020826/ENSMUSG00000020638/ENSMUSG00000105096/ENSMUSG00000021624/ENSMUSG00000039217/ENSMUSG00000028270/ENSMUSG00000016024/ENSMUSG00000104713/ENSMUSG00000041515/ENSMUSG00000026104/ENSMUSG00000035385/ENSMUSG00000024789/ENSMUSG00000027995/ENSMUSG00000016496/ENSMUSG00000051439/ENSMUSG00000034855/ENSMUSG00000028191/…	4	ENSMUSG00000015243/ENSMUSG00000047123/ENSMUSG00000024045/ENSMUSG00000029254
BP	GO:0042108	positive regulation of cytokine biosynthetic process	21|1102	70|14957	1.59758e-08	2.83848e-06	ENSMUSG00000049103/ENSMUSG00000016024/ENSMUSG00000035914/ENSMUSG00000004043/ENSMUSG00000018899/ENSMUSG00000051457/ENSMUSG00000053175/ENSMUSG00000024789/ENSMUSG00000027995/ENSMUSG00000004951/ENSMUSG00000028076/ENSMUSG00000028191/ENSMUSG00000047123/ENSMUSG00000000732/ENSMUSG00000032508/ENSMUSG00000031639/ENSMUSG00000004040/ENSMUSG00000044827/ENSMUSG00000044701/ENSMUSG00000044583/ENSMUSG00000020115	Ccr2/Lbp/Cd276/Stat5a/Irf1/Spn/Bcl3/Jak2/Tlr2/Hspb1/Cd1d1/Bcl10/Ticam1/Icosl/Myd88/Tlr3/Stat3/Tlr1/Il27/Tlr7/Tbk1	21	19	ENSMUSG00000049103/ENSMUSG00000016024/ENSMUSG00000035914/ENSMUSG00000004043/ENSMUSG00000018899/ENSMUSG00000051457/ENSMUSG00000053175/ENSMUSG00000024789/ENSMUSG00000027995/ENSMUSG00000004951/ENSMUSG00000028076/ENSMUSG00000028191/ENSMUSG00000000732/ENSMUSG00000032508/ENSMUSG00000031639/ENSMUSG00000004040/ENSMUSG00000044827/ENSMUSG00000044701/ENSMUSG00000020115	2	ENSMUSG00000047123/ENSMUSG00000044583
BP	GO:0097529	myeloid leukocyte migration	36|1102	176|14957	1.61562e-08	2.83848e-06	ENSMUSG00000029417/ENSMUSG00000026072/ENSMUSG00000049103/ENSMUSG00000016024/ENSMUSG00000037362/ENSMUSG00000025314/ENSMUSG00000035385/ENSMUSG00000052270/ENSMUSG00000026271/ENSMUSG00000056071/ENSMUSG00000034855/ENSMUSG00000053318/ENSMUSG00000032114/ENSMUSG00000023913/ENSMUSG00000000290/ENSMUSG00000055447/ENSMUSG00000029163/ENSMUSG00000030281/ENSMUSG00000037902/ENSMUSG00000032508/ENSMUSG00000024397/…	Cxcl9/Il1r1/Ccr2/Lbp/Nov/Ptprj/Ccl2/Fpr2/Gpr35/S100a9/Cxcl10/Slamf8/Slc37a4/Pla2g7/Itgb2/Cd47/Emilin1/Il17rc/Sirpa/Myd88/Aif1/Lgals3/Fcer1g/Rac2/Csf3r/Nod2/Ccl5/Kars/Arhgef5/Ccr1/Bst1/Ptpro/Il1rn/Cxadr/Stap1/Camk1d	36	32	ENSMUSG00000029417/ENSMUSG00000049103/ENSMUSG00000016024/ENSMUSG00000037362/ENSMUSG00000025314/ENSMUSG00000035385/ENSMUSG00000052270/ENSMUSG00000026271/ENSMUSG00000056071/ENSMUSG00000034855/ENSMUSG00000053318/ENSMUSG00000000290/ENSMUSG00000055447/ENSMUSG00000029163/ENSMUSG00000030281/ENSMUSG00000037902/ENSMUSG00000032508/ENSMUSG00000024397/ENSMUSG00000050335/ENSMUSG00000058715/ENSMUSG00000033220/…	4	ENSMUSG00000026072/ENSMUSG00000032114/ENSMUSG00000023913/ENSMUSG00000029254
BP	GO:0031349	positive regulation of defense response	54|1102	328|14957	1.73029e-08	2.9386e-06	ENSMUSG00000046688/ENSMUSG00000025498/ENSMUSG00000030895/ENSMUSG00000074151/ENSMUSG00000069874/ENSMUSG00000022126/ENSMUSG00000030560/ENSMUSG00000049103/ENSMUSG00000032193/ENSMUSG00000027514/ENSMUSG00000036908/ENSMUSG00000037820/ENSMUSG00000016024/ENSMUSG00000015947/ENSMUSG00000020122/ENSMUSG00000004043/ENSMUSG00000046879/ENSMUSG00000023088/ENSMUSG00000018899/ENSMUSG00000052270/ENSMUSG00000024789/…	Tifa/Irf7/Hpx/Nlrc5/Irgm2/Acod1/Ctsc/Ccr2/Ldlr/Zbp1/Unc93b1/Tgm2/Lbp/Fcgr1/Egfr/Stat5a/Irgm1/Abcc1/Irf1/Fpr2/Jak2/Tlr2/Ttbk1/Dhx58/Cd14/Tnfrsf1a/S100a9/Ddx58/Hmgb2/Flot1/Cd47/Zc3hav1/Rasgrp1/Bcl10/Il17rc/Ticam1/Myd88/Tlr3/Fcer1g/Plscr1/Gbp5/Ddx60/Nod2/Ccl5/Tlr1/Pycard/Lgals9/Kars/Tlr7/Ulbp1/Nlrc4/Tbk1/Stap1/Tnfaip3	54	49	ENSMUSG00000046688/ENSMUSG00000025498/ENSMUSG00000030895/ENSMUSG00000074151/ENSMUSG00000069874/ENSMUSG00000022126/ENSMUSG00000030560/ENSMUSG00000049103/ENSMUSG00000032193/ENSMUSG00000027514/ENSMUSG00000036908/ENSMUSG00000037820/ENSMUSG00000016024/ENSMUSG00000015947/ENSMUSG00000004043/ENSMUSG00000046879/ENSMUSG00000023088/ENSMUSG00000018899/ENSMUSG00000052270/ENSMUSG00000024789/ENSMUSG00000027995/…	5	ENSMUSG00000020122/ENSMUSG00000015599/ENSMUSG00000047123/ENSMUSG00000044583/ENSMUSG00000029254
BP	GO:1903555	regulation of tumor necrosis factor superfamily cytokine production	33|1102	154|14957	1.93574e-08	3.12698e-06	ENSMUSG00000049103/ENSMUSG00000039217/ENSMUSG00000016024/ENSMUSG00000025314/ENSMUSG00000051457/ENSMUSG00000053175/ENSMUSG00000035385/ENSMUSG00000024789/ENSMUSG00000027995/ENSMUSG00000016496/ENSMUSG00000051439/ENSMUSG00000031451/ENSMUSG00000030341/ENSMUSG00000004951/ENSMUSG00000040296/ENSMUSG00000050350/ENSMUSG00000031101/ENSMUSG00000055447/ENSMUSG00000027347/ENSMUSG00000020053/ENSMUSG00000047123/…	Ccr2/Il18/Lbp/Ptprj/Spn/Bcl3/Ccl2/Jak2/Tlr2/Cd274/Cd14/Gas6/Tnfrsf1a/Hspb1/Ddx58/Gpr18/Sash3/Cd47/Rasgrp1/Igf1/Ticam1/Sirpa/Myd88/Tlr3/Fcer1g/Akap8/Nod2/Tlr1/Pycard/Lgals9/Cyp2j6/Tnfaip3/Gpnmb	33	28	ENSMUSG00000049103/ENSMUSG00000039217/ENSMUSG00000016024/ENSMUSG00000025314/ENSMUSG00000051457/ENSMUSG00000053175/ENSMUSG00000035385/ENSMUSG00000024789/ENSMUSG00000027995/ENSMUSG00000016496/ENSMUSG00000051439/ENSMUSG00000031451/ENSMUSG00000030341/ENSMUSG00000004951/ENSMUSG00000040296/ENSMUSG00000050350/ENSMUSG00000031101/ENSMUSG00000055447/ENSMUSG00000027347/ENSMUSG00000037902/ENSMUSG00000032508/…	5	ENSMUSG00000020053/ENSMUSG00000047123/ENSMUSG00000024045/ENSMUSG00000052914/ENSMUSG00000029816
BP	GO:0042110	T cell activation	65|1102	430|14957	1.96395e-08	3.12698e-06	ENSMUSG00000031628/ENSMUSG00000068220/ENSMUSG00000001750/ENSMUSG00000042333/ENSMUSG00000049103/ENSMUSG00000037405/ENSMUSG00000039217/ENSMUSG00000038037/ENSMUSG00000028064/ENSMUSG00000039384/ENSMUSG00000031594/ENSMUSG00000035914/ENSMUSG00000004043/ENSMUSG00000039323/ENSMUSG00000002983/ENSMUSG00000018899/ENSMUSG00000051457/ENSMUSG00000028757/ENSMUSG00000031897/ENSMUSG00000024778/ENSMUSG00000039153/…	Casp3/Lgals1/Tcirg1/Tnfrsf14/Ccr2/Icam1/Il18/Socs1/Sema4a/Dusp10/Fgl1/Cd276/Stat5a/Igfbp2/Relb/Irf1/Spn/Ddost/Psmb10/Fas/Runx2/Bcl3/Ccl2/Pnp/Msn/Cd274/Cd1d1/Jak3/Wwp1/Gpr18/Il7/Zc3h12d/Sash3/Itgb2/Cd47/Rasgrp1/Bcl10/Igf1/Icosl/Coro1a/Sirpa/Aif1/Braf/Tnfsf13b/Lgals3/Fcer1g/Rac2/Fanca/Stat3/Ccl5/Vsig4/Slfn1/Lcp1/Il27/Pycard/Lgals9/Cd5/Adora2a/Hsp90aa1/Cxadr/Dock2/H2-DMa/Tnfsf8/Malt1/Gpnmb	65	58	ENSMUSG00000031628/ENSMUSG00000068220/ENSMUSG00000001750/ENSMUSG00000042333/ENSMUSG00000049103/ENSMUSG00000037405/ENSMUSG00000039217/ENSMUSG00000038037/ENSMUSG00000028064/ENSMUSG00000039384/ENSMUSG00000031594/ENSMUSG00000035914/ENSMUSG00000004043/ENSMUSG00000002983/ENSMUSG00000018899/ENSMUSG00000051457/ENSMUSG00000031897/ENSMUSG00000024778/ENSMUSG00000039153/ENSMUSG00000053175/ENSMUSG00000035385/…	7	ENSMUSG00000039323/ENSMUSG00000028757/ENSMUSG00000041058/ENSMUSG00000020053/ENSMUSG00000002413/ENSMUSG00000044206/ENSMUSG00000029816
BP	GO:0016125	sterol metabolic process	29|1102	125|14957	2.17517e-08	3.35833e-06	ENSMUSG00000074115/ENSMUSG00000036585/ENSMUSG00000045294/ENSMUSG00000032018/ENSMUSG00000032080/ENSMUSG00000032193/ENSMUSG00000003123/ENSMUSG00000041567/ENSMUSG00000044254/ENSMUSG00000031594/ENSMUSG00000032083/ENSMUSG00000023022/ENSMUSG00000024799/ENSMUSG00000022351/ENSMUSG00000015243/ENSMUSG00000028603/ENSMUSG00000027952/ENSMUSG00000041939/ENSMUSG00000034088/ENSMUSG00000021252/ENSMUSG00000027875/…	Saa1/Fgf1/Insig1/Sc5d/Apoa4/Ldlr/Lipe/Serpina12/Pcsk9/Fgl1/Apoa1/Lima1/Tm7sf2/Sqle/Abca1/Scp2/Pmvk/Mvk/Hdlbp/Erg28/Hmgcs2/Angptl3/Lbr/Nsdhl/Hmgcs1/Mttp/Cyp7b1/Apoa5/Msmo1	29	17	ENSMUSG00000074115/ENSMUSG00000045294/ENSMUSG00000032018/ENSMUSG00000032193/ENSMUSG00000003123/ENSMUSG00000044254/ENSMUSG00000031594/ENSMUSG00000023022/ENSMUSG00000024799/ENSMUSG00000022351/ENSMUSG00000027952/ENSMUSG00000041939/ENSMUSG00000021252/ENSMUSG00000004880/ENSMUSG00000031349/ENSMUSG00000093930/ENSMUSG00000031604	12	ENSMUSG00000036585/ENSMUSG00000032080/ENSMUSG00000041567/ENSMUSG00000032083/ENSMUSG00000015243/ENSMUSG00000028603/ENSMUSG00000034088/ENSMUSG00000027875/ENSMUSG00000028553/ENSMUSG00000028158/ENSMUSG00000039519/ENSMUSG00000032079
BP	GO:0002694	regulation of leukocyte activation	68|1102	461|14957	2.49113e-08	3.73304e-06	ENSMUSG00000031628/ENSMUSG00000068220/ENSMUSG00000042333/ENSMUSG00000030560/ENSMUSG00000049103/ENSMUSG00000032193/ENSMUSG00000039217/ENSMUSG00000023249/ENSMUSG00000038037/ENSMUSG00000039384/ENSMUSG00000016024/ENSMUSG00000031594/ENSMUSG00000035914/ENSMUSG00000004043/ENSMUSG00000039323/ENSMUSG00000018899/ENSMUSG00000051457/ENSMUSG00000024778/ENSMUSG00000035385/ENSMUSG00000041471/ENSMUSG00000115338/…	Casp3/Lgals1/Tnfrsf14/Ctsc/Ccr2/Ldlr/Il18/Parp3/Socs1/Dusp10/Lbp/Fgl1/Cd276/Stat5a/Igfbp2/Irf1/Spn/Fas/Ccl2/Shld2/Pnp/Ttbk1/Cd274/Fgr/Gas6/Cd1d1/Jak3/Il7/Slamf8/Zc3h12d/Sash3/Itgb2/Cd47/Rasgrp1/Bcl10/Igf1/Ticam1/Icosl/Coro1a/Sirpa/Myd88/Aif1/Braf/Tnfsf13b/Lgals3/Fcer1g/Plscr1/Rac2/Nod2/Fanca/Ccl5/Vsig4/Slfn1/Il27/Pycard/Lgals9/Kars/Cd5/Adora2a/Hsp90aa1/Bst1/Ulbp1/Hps1/Stap1/Tnfaip3/H2-DMa/Malt1/G…	68	59	ENSMUSG00000031628/ENSMUSG00000068220/ENSMUSG00000042333/ENSMUSG00000030560/ENSMUSG00000049103/ENSMUSG00000032193/ENSMUSG00000039217/ENSMUSG00000023249/ENSMUSG00000038037/ENSMUSG00000039384/ENSMUSG00000016024/ENSMUSG00000031594/ENSMUSG00000035914/ENSMUSG00000004043/ENSMUSG00000018899/ENSMUSG00000051457/ENSMUSG00000024778/ENSMUSG00000035385/ENSMUSG00000115338/ENSMUSG00000016496/ENSMUSG00000028874/…	9	ENSMUSG00000039323/ENSMUSG00000041471/ENSMUSG00000015599/ENSMUSG00000020053/ENSMUSG00000047123/ENSMUSG00000002413/ENSMUSG00000044206/ENSMUSG00000029254/ENSMUSG00000029816
BP	GO:0032479	regulation of type I interferon production	22|1102	78|14957	2.56616e-08	3.7356e-06	ENSMUSG00000025498/ENSMUSG00000022126/ENSMUSG00000026104/ENSMUSG00000002983/ENSMUSG00000079363/ENSMUSG00000018899/ENSMUSG00000027995/ENSMUSG00000017830/ENSMUSG00000051439/ENSMUSG00000040296/ENSMUSG00000054717/ENSMUSG00000059714/ENSMUSG00000029826/ENSMUSG00000047123/ENSMUSG00000037902/ENSMUSG00000032508/ENSMUSG00000031639/ENSMUSG00000034330/ENSMUSG00000034292/ENSMUSG00000030793/ENSMUSG00000044583/…	Irf7/Acod1/Stat1/Relb/Gbp4/Irf1/Tlr2/Dhx58/Cd14/Ddx58/Hmgb2/Flot1/Zc3hav1/Ticam1/Sirpa/Myd88/Tlr3/Plcg2/Traf3ip1/Pycard/Tlr7/Tbk1	22	19	ENSMUSG00000025498/ENSMUSG00000022126/ENSMUSG00000026104/ENSMUSG00000002983/ENSMUSG00000079363/ENSMUSG00000018899/ENSMUSG00000027995/ENSMUSG00000017830/ENSMUSG00000051439/ENSMUSG00000040296/ENSMUSG00000054717/ENSMUSG00000059714/ENSMUSG00000029826/ENSMUSG00000037902/ENSMUSG00000032508/ENSMUSG00000031639/ENSMUSG00000034330/ENSMUSG00000030793/ENSMUSG00000020115	3	ENSMUSG00000047123/ENSMUSG00000034292/ENSMUSG00000044583
BP	GO:0002697	regulation of immune effector process	57|1102	360|14957	2.88776e-08	3.97653e-06	ENSMUSG00000030895/ENSMUSG00000067235/ENSMUSG00000026072/ENSMUSG00000022181/ENSMUSG00000036986/ENSMUSG00000042333/ENSMUSG00000049103/ENSMUSG00000039217/ENSMUSG00000023249/ENSMUSG00000039384/ENSMUSG00000016024/ENSMUSG00000015947/ENSMUSG00000009585/ENSMUSG00000026104/ENSMUSG00000032083/ENSMUSG00000004043/ENSMUSG00000079363/ENSMUSG00000025314/ENSMUSG00000018899/ENSMUSG00000051457/ENSMUSG00000037321/…	Hpx/H2-Q10/Il1r1/C6/Pml/Tnfrsf14/Ccr2/Il18/Parp3/Dusp10/Lbp/Fcgr1/Apobec3/Stat1/Apoa1/Stat5a/Gbp4/Ptprj/Irf1/Spn/Tap1/Ccl2/Shld2/Pnp/Tlr2/Serpinb9/Fgr/Clec2d/Dhx58/Rbp4/Ddx58/Cd1d1/Jak3/Slamf8/Sash3/Itgb2/Cd47/Zc3hav1/Rasgrp1/Ticam1/Tlr3/Lgals3/Fcer1g/Rac2/Ddx60/Nod2/Ccl5/Vsig4/Il27/Hk1/Traf3ip1/Pycard/Lgals9/Kars/Ulbp1/Tnfaip3/Malt1	57	49	ENSMUSG00000030895/ENSMUSG00000067235/ENSMUSG00000036986/ENSMUSG00000042333/ENSMUSG00000049103/ENSMUSG00000039217/ENSMUSG00000023249/ENSMUSG00000039384/ENSMUSG00000016024/ENSMUSG00000015947/ENSMUSG00000009585/ENSMUSG00000026104/ENSMUSG00000004043/ENSMUSG00000079363/ENSMUSG00000025314/ENSMUSG00000018899/ENSMUSG00000051457/ENSMUSG00000037321/ENSMUSG00000035385/ENSMUSG00000115338/ENSMUSG00000027995/…	8	ENSMUSG00000026072/ENSMUSG00000022181/ENSMUSG00000032083/ENSMUSG00000041471/ENSMUSG00000024990/ENSMUSG00000047123/ENSMUSG00000044206/ENSMUSG00000034292
BP	GO:0022407	regulation of cell-cell adhesion	57|1102	360|14957	2.88776e-08	3.97653e-06	ENSMUSG00000031628/ENSMUSG00000068220/ENSMUSG00000042333/ENSMUSG00000021948/ENSMUSG00000049103/ENSMUSG00000037405/ENSMUSG00000039217/ENSMUSG00000027009/ENSMUSG00000038037/ENSMUSG00000039384/ENSMUSG00000028517/ENSMUSG00000031594/ENSMUSG00000021149/ENSMUSG00000035914/ENSMUSG00000032083/ENSMUSG00000004043/ENSMUSG00000039323/ENSMUSG00000018899/ENSMUSG00000051457/ENSMUSG00000035385/ENSMUSG00000024789/…	Casp3/Lgals1/Tnfrsf14/Prkcd/Ccr2/Icam1/Il18/Itga4/Socs1/Dusp10/Plpp3/Fgl1/Gtpbp4/Cd276/Apoa1/Stat5a/Igfbp2/Irf1/Spn/Ccl2/Jak2/Pnp/Capn1/Cd274/Cd1d1/Jak3/Il7/Flot1/Zc3h12d/Sash3/Itgb2/Cd47/Rasgrp1/Bcl10/Igf1/Fermt3/Icosl/Coro1a/Sirpa/Aif1/Tnfsf13b/Lgals3/Ccl5/Vsig4/Slfn1/Pycard/Lgals9/Cd5/Myadm/Adora2a/Hsp90aa1/Il1rn/Tnfaip3/H2-DMa/Akna/Malt1/Gpnmb	57	50	ENSMUSG00000031628/ENSMUSG00000068220/ENSMUSG00000042333/ENSMUSG00000021948/ENSMUSG00000049103/ENSMUSG00000037405/ENSMUSG00000039217/ENSMUSG00000027009/ENSMUSG00000038037/ENSMUSG00000039384/ENSMUSG00000031594/ENSMUSG00000035914/ENSMUSG00000004043/ENSMUSG00000018899/ENSMUSG00000051457/ENSMUSG00000035385/ENSMUSG00000024789/ENSMUSG00000115338/ENSMUSG00000024942/ENSMUSG00000016496/ENSMUSG00000028076/…	7	ENSMUSG00000028517/ENSMUSG00000021149/ENSMUSG00000032083/ENSMUSG00000039323/ENSMUSG00000020053/ENSMUSG00000044206/ENSMUSG00000029816
BP	GO:1903037	regulation of leukocyte cell-cell adhesion	46|1102	263|14957	3.0765e-08	4.12494e-06	ENSMUSG00000031628/ENSMUSG00000068220/ENSMUSG00000042333/ENSMUSG00000049103/ENSMUSG00000037405/ENSMUSG00000039217/ENSMUSG00000027009/ENSMUSG00000038037/ENSMUSG00000039384/ENSMUSG00000031594/ENSMUSG00000035914/ENSMUSG00000004043/ENSMUSG00000039323/ENSMUSG00000018899/ENSMUSG00000051457/ENSMUSG00000035385/ENSMUSG00000115338/ENSMUSG00000024942/ENSMUSG00000016496/ENSMUSG00000028076/ENSMUSG00000031805/…	Casp3/Lgals1/Tnfrsf14/Ccr2/Icam1/Il18/Itga4/Socs1/Dusp10/Fgl1/Cd276/Stat5a/Igfbp2/Irf1/Spn/Ccl2/Pnp/Capn1/Cd274/Cd1d1/Jak3/Il7/Zc3h12d/Sash3/Itgb2/Cd47/Rasgrp1/Bcl10/Igf1/Icosl/Coro1a/Sirpa/Aif1/Tnfsf13b/Lgals3/Ccl5/Vsig4/Slfn1/Pycard/Lgals9/Cd5/Adora2a/Hsp90aa1/H2-DMa/Malt1/Gpnmb	46	42	ENSMUSG00000031628/ENSMUSG00000068220/ENSMUSG00000042333/ENSMUSG00000049103/ENSMUSG00000037405/ENSMUSG00000039217/ENSMUSG00000027009/ENSMUSG00000038037/ENSMUSG00000039384/ENSMUSG00000031594/ENSMUSG00000035914/ENSMUSG00000004043/ENSMUSG00000018899/ENSMUSG00000051457/ENSMUSG00000035385/ENSMUSG00000115338/ENSMUSG00000024942/ENSMUSG00000016496/ENSMUSG00000028076/ENSMUSG00000031805/ENSMUSG00000040329/…	4	ENSMUSG00000039323/ENSMUSG00000020053/ENSMUSG00000044206/ENSMUSG00000029816
BP	GO:0071706	tumor necrosis factor superfamily cytokine production	33|1102	157|14957	3.18339e-08	4.15881e-06	ENSMUSG00000049103/ENSMUSG00000039217/ENSMUSG00000016024/ENSMUSG00000025314/ENSMUSG00000051457/ENSMUSG00000053175/ENSMUSG00000035385/ENSMUSG00000024789/ENSMUSG00000027995/ENSMUSG00000016496/ENSMUSG00000051439/ENSMUSG00000031451/ENSMUSG00000030341/ENSMUSG00000004951/ENSMUSG00000040296/ENSMUSG00000050350/ENSMUSG00000031101/ENSMUSG00000055447/ENSMUSG00000027347/ENSMUSG00000020053/ENSMUSG00000047123/…	Ccr2/Il18/Lbp/Ptprj/Spn/Bcl3/Ccl2/Jak2/Tlr2/Cd274/Cd14/Gas6/Tnfrsf1a/Hspb1/Ddx58/Gpr18/Sash3/Cd47/Rasgrp1/Igf1/Ticam1/Sirpa/Myd88/Tlr3/Fcer1g/Akap8/Nod2/Tlr1/Pycard/Lgals9/Cyp2j6/Tnfaip3/Gpnmb	33	28	ENSMUSG00000049103/ENSMUSG00000039217/ENSMUSG00000016024/ENSMUSG00000025314/ENSMUSG00000051457/ENSMUSG00000053175/ENSMUSG00000035385/ENSMUSG00000024789/ENSMUSG00000027995/ENSMUSG00000016496/ENSMUSG00000051439/ENSMUSG00000031451/ENSMUSG00000030341/ENSMUSG00000004951/ENSMUSG00000040296/ENSMUSG00000050350/ENSMUSG00000031101/ENSMUSG00000055447/ENSMUSG00000027347/ENSMUSG00000037902/ENSMUSG00000032508/…	5	ENSMUSG00000020053/ENSMUSG00000047123/ENSMUSG00000024045/ENSMUSG00000052914/ENSMUSG00000029816
BP	GO:0030595	leukocyte chemotaxis	36|1102	183|14957	4.65719e-08	5.85128e-06	ENSMUSG00000029417/ENSMUSG00000049103/ENSMUSG00000016024/ENSMUSG00000037362/ENSMUSG00000025314/ENSMUSG00000035385/ENSMUSG00000052270/ENSMUSG00000026271/ENSMUSG00000031451/ENSMUSG00000056071/ENSMUSG00000034855/ENSMUSG00000050350/ENSMUSG00000053318/ENSMUSG00000032114/ENSMUSG00000023913/ENSMUSG00000000290/ENSMUSG00000030281/ENSMUSG00000030707/ENSMUSG00000024397/ENSMUSG00000050335/ENSMUSG00000058715/…	Cxcl9/Ccr2/Lbp/Nov/Ptprj/Ccl2/Fpr2/Gpr35/Gas6/S100a9/Cxcl10/Gpr18/Slamf8/Slc37a4/Pla2g7/Itgb2/Il17rc/Coro1a/Aif1/Lgals3/Fcer1g/Rac2/Csf3r/Nod2/Cyp7b1/Ccl5/Kars/Arhgef5/Ccr1/Bst1/Ptpro/Il1rn/Cxadr/Stap1/Camk1d/Slc8b1	36	32	ENSMUSG00000029417/ENSMUSG00000049103/ENSMUSG00000016024/ENSMUSG00000037362/ENSMUSG00000025314/ENSMUSG00000035385/ENSMUSG00000052270/ENSMUSG00000026271/ENSMUSG00000031451/ENSMUSG00000056071/ENSMUSG00000034855/ENSMUSG00000050350/ENSMUSG00000053318/ENSMUSG00000000290/ENSMUSG00000030281/ENSMUSG00000030707/ENSMUSG00000024397/ENSMUSG00000050335/ENSMUSG00000058715/ENSMUSG00000033220/ENSMUSG00000028859/…	4	ENSMUSG00000032114/ENSMUSG00000023913/ENSMUSG00000039519/ENSMUSG00000029254
BP	GO:0016126	sterol biosynthetic process	17|1102	50|14957	4.70858e-08	5.85128e-06	ENSMUSG00000036585/ENSMUSG00000045294/ENSMUSG00000032018/ENSMUSG00000032080/ENSMUSG00000032083/ENSMUSG00000024799/ENSMUSG00000022351/ENSMUSG00000028603/ENSMUSG00000027952/ENSMUSG00000041939/ENSMUSG00000021252/ENSMUSG00000027875/ENSMUSG00000004880/ENSMUSG00000031349/ENSMUSG00000093930/ENSMUSG00000032079/ENSMUSG00000031604	Fgf1/Insig1/Sc5d/Apoa4/Apoa1/Tm7sf2/Sqle/Scp2/Pmvk/Mvk/Erg28/Hmgcs2/Lbr/Nsdhl/Hmgcs1/Apoa5/Msmo1	17	11	ENSMUSG00000045294/ENSMUSG00000032018/ENSMUSG00000024799/ENSMUSG00000022351/ENSMUSG00000027952/ENSMUSG00000041939/ENSMUSG00000021252/ENSMUSG00000004880/ENSMUSG00000031349/ENSMUSG00000093930/ENSMUSG00000031604	6	ENSMUSG00000036585/ENSMUSG00000032080/ENSMUSG00000032083/ENSMUSG00000028603/ENSMUSG00000027875/ENSMUSG00000032079
BP	GO:0032680	regulation of tumor necrosis factor production	32|1102	152|14957	4.9329e-08	5.98408e-06	ENSMUSG00000049103/ENSMUSG00000039217/ENSMUSG00000016024/ENSMUSG00000025314/ENSMUSG00000051457/ENSMUSG00000053175/ENSMUSG00000035385/ENSMUSG00000024789/ENSMUSG00000027995/ENSMUSG00000051439/ENSMUSG00000031451/ENSMUSG00000030341/ENSMUSG00000004951/ENSMUSG00000040296/ENSMUSG00000050350/ENSMUSG00000031101/ENSMUSG00000055447/ENSMUSG00000027347/ENSMUSG00000020053/ENSMUSG00000047123/ENSMUSG00000037902/…	Ccr2/Il18/Lbp/Ptprj/Spn/Bcl3/Ccl2/Jak2/Tlr2/Cd14/Gas6/Tnfrsf1a/Hspb1/Ddx58/Gpr18/Sash3/Cd47/Rasgrp1/Igf1/Ticam1/Sirpa/Myd88/Tlr3/Fcer1g/Akap8/Nod2/Tlr1/Pycard/Lgals9/Cyp2j6/Tnfaip3/Gpnmb	32	27	ENSMUSG00000049103/ENSMUSG00000039217/ENSMUSG00000016024/ENSMUSG00000025314/ENSMUSG00000051457/ENSMUSG00000053175/ENSMUSG00000035385/ENSMUSG00000024789/ENSMUSG00000027995/ENSMUSG00000051439/ENSMUSG00000031451/ENSMUSG00000030341/ENSMUSG00000004951/ENSMUSG00000040296/ENSMUSG00000050350/ENSMUSG00000031101/ENSMUSG00000055447/ENSMUSG00000027347/ENSMUSG00000037902/ENSMUSG00000032508/ENSMUSG00000031639/…	5	ENSMUSG00000020053/ENSMUSG00000047123/ENSMUSG00000024045/ENSMUSG00000052914/ENSMUSG00000029816
BP	GO:0051249	regulation of lymphocyte activation	58|1102	375|14957	5.1006e-08	6.04362e-06	ENSMUSG00000031628/ENSMUSG00000068220/ENSMUSG00000042333/ENSMUSG00000049103/ENSMUSG00000039217/ENSMUSG00000023249/ENSMUSG00000038037/ENSMUSG00000039384/ENSMUSG00000031594/ENSMUSG00000035914/ENSMUSG00000004043/ENSMUSG00000039323/ENSMUSG00000018899/ENSMUSG00000051457/ENSMUSG00000024778/ENSMUSG00000035385/ENSMUSG00000041471/ENSMUSG00000115338/ENSMUSG00000016496/ENSMUSG00000031451/ENSMUSG00000028076/…	Casp3/Lgals1/Tnfrsf14/Ccr2/Il18/Parp3/Socs1/Dusp10/Fgl1/Cd276/Stat5a/Igfbp2/Irf1/Spn/Fas/Ccl2/Shld2/Pnp/Cd274/Gas6/Cd1d1/Jak3/Il7/Slamf8/Zc3h12d/Sash3/Cd47/Rasgrp1/Bcl10/Igf1/Ticam1/Icosl/Coro1a/Sirpa/Myd88/Aif1/Braf/Tnfsf13b/Lgals3/Rac2/Nod2/Fanca/Ccl5/Vsig4/Slfn1/Il27/Pycard/Lgals9/Cd5/Adora2a/Hsp90aa1/Bst1/Ulbp1/Hps1/Tnfaip3/H2-DMa/Malt1/Gpnmb	58	51	ENSMUSG00000031628/ENSMUSG00000068220/ENSMUSG00000042333/ENSMUSG00000049103/ENSMUSG00000039217/ENSMUSG00000023249/ENSMUSG00000038037/ENSMUSG00000039384/ENSMUSG00000031594/ENSMUSG00000035914/ENSMUSG00000004043/ENSMUSG00000018899/ENSMUSG00000051457/ENSMUSG00000024778/ENSMUSG00000035385/ENSMUSG00000115338/ENSMUSG00000016496/ENSMUSG00000031451/ENSMUSG00000028076/ENSMUSG00000031805/ENSMUSG00000040329/…	7	ENSMUSG00000039323/ENSMUSG00000041471/ENSMUSG00000020053/ENSMUSG00000047123/ENSMUSG00000002413/ENSMUSG00000044206/ENSMUSG00000029816
BP	GO:0051251	positive regulation of lymphocyte activation	42|1102	234|14957	5.75498e-08	6.66401e-06	ENSMUSG00000068220/ENSMUSG00000042333/ENSMUSG00000049103/ENSMUSG00000039217/ENSMUSG00000038037/ENSMUSG00000039384/ENSMUSG00000035914/ENSMUSG00000004043/ENSMUSG00000039323/ENSMUSG00000018899/ENSMUSG00000051457/ENSMUSG00000035385/ENSMUSG00000041471/ENSMUSG00000115338/ENSMUSG00000016496/ENSMUSG00000031451/ENSMUSG00000028076/ENSMUSG00000031805/ENSMUSG00000040329/ENSMUSG00000031101/ENSMUSG00000055447/…	Lgals1/Tnfrsf14/Ccr2/Il18/Socs1/Dusp10/Cd276/Stat5a/Igfbp2/Irf1/Spn/Ccl2/Shld2/Pnp/Cd274/Gas6/Cd1d1/Jak3/Il7/Sash3/Cd47/Rasgrp1/Bcl10/Igf1/Ticam1/Icosl/Coro1a/Sirpa/Myd88/Aif1/Tnfsf13b/Nod2/Ccl5/Pycard/Lgals9/Cd5/Hsp90aa1/Bst1/Ulbp1/Hps1/H2-DMa/Malt1	42	38	ENSMUSG00000068220/ENSMUSG00000042333/ENSMUSG00000049103/ENSMUSG00000039217/ENSMUSG00000038037/ENSMUSG00000039384/ENSMUSG00000035914/ENSMUSG00000004043/ENSMUSG00000018899/ENSMUSG00000051457/ENSMUSG00000035385/ENSMUSG00000115338/ENSMUSG00000016496/ENSMUSG00000031451/ENSMUSG00000028076/ENSMUSG00000031805/ENSMUSG00000040329/ENSMUSG00000031101/ENSMUSG00000055447/ENSMUSG00000027347/ENSMUSG00000028191/…	4	ENSMUSG00000039323/ENSMUSG00000041471/ENSMUSG00000020053/ENSMUSG00000047123
BP	GO:0008203	cholesterol metabolic process	27|1102	116|14957	6.15726e-08	6.97139e-06	ENSMUSG00000074115/ENSMUSG00000036585/ENSMUSG00000045294/ENSMUSG00000032018/ENSMUSG00000032080/ENSMUSG00000032193/ENSMUSG00000003123/ENSMUSG00000041567/ENSMUSG00000044254/ENSMUSG00000031594/ENSMUSG00000032083/ENSMUSG00000023022/ENSMUSG00000024799/ENSMUSG00000022351/ENSMUSG00000015243/ENSMUSG00000028603/ENSMUSG00000027952/ENSMUSG00000041939/ENSMUSG00000034088/ENSMUSG00000027875/ENSMUSG00000028553/…	Saa1/Fgf1/Insig1/Sc5d/Apoa4/Ldlr/Lipe/Serpina12/Pcsk9/Fgl1/Apoa1/Lima1/Tm7sf2/Sqle/Abca1/Scp2/Pmvk/Mvk/Hdlbp/Hmgcs2/Angptl3/Lbr/Nsdhl/Hmgcs1/Mttp/Cyp7b1/Apoa5	27	15	ENSMUSG00000074115/ENSMUSG00000045294/ENSMUSG00000032018/ENSMUSG00000032193/ENSMUSG00000003123/ENSMUSG00000044254/ENSMUSG00000031594/ENSMUSG00000023022/ENSMUSG00000024799/ENSMUSG00000022351/ENSMUSG00000027952/ENSMUSG00000041939/ENSMUSG00000004880/ENSMUSG00000031349/ENSMUSG00000093930	12	ENSMUSG00000036585/ENSMUSG00000032080/ENSMUSG00000041567/ENSMUSG00000032083/ENSMUSG00000015243/ENSMUSG00000028603/ENSMUSG00000034088/ENSMUSG00000027875/ENSMUSG00000028553/ENSMUSG00000028158/ENSMUSG00000039519/ENSMUSG00000032079
BP	GO:0006066	alcohol metabolic process	48|1102	287|14957	6.55785e-08	7.26353e-06	ENSMUSG00000074115/ENSMUSG00000036585/ENSMUSG00000066441/ENSMUSG00000045294/ENSMUSG00000032018/ENSMUSG00000015806/ENSMUSG00000032080/ENSMUSG00000032193/ENSMUSG00000027261/ENSMUSG00000025190/ENSMUSG00000003123/ENSMUSG00000041567/ENSMUSG00000057963/ENSMUSG00000044254/ENSMUSG00000031594/ENSMUSG00000032083/ENSMUSG00000056666/ENSMUSG00000023022/ENSMUSG00000048612/ENSMUSG00000024799/ENSMUSG00000028236/…	Saa1/Fgf1/Rdh11/Insig1/Sc5d/Qdpr/Apoa4/Ldlr/Hao1/Got1/Lipe/Serpina12/Itpk1/Pcsk9/Fgl1/Apoa1/Retsat/Lima1/Myof/Tm7sf2/Sdr16c5/Sqle/Abca1/Scp2/Pmvk/Rbp4/Impa2/Isyna1/Mvk/Ipmk/Hdlbp/Naaa/Gpd1/Erg28/Plek/Hmgcs2/Cyp2r1/Angptl3/Plcg2/Lbr/Nsdhl/Nfkb1/Hmgcs1/Mttp/Cyp7b1/Apoa5/Gch1/Dhdds	48	30	ENSMUSG00000074115/ENSMUSG00000066441/ENSMUSG00000045294/ENSMUSG00000032018/ENSMUSG00000015806/ENSMUSG00000032193/ENSMUSG00000025190/ENSMUSG00000003123/ENSMUSG00000057963/ENSMUSG00000044254/ENSMUSG00000031594/ENSMUSG00000023022/ENSMUSG00000048612/ENSMUSG00000024799/ENSMUSG00000022351/ENSMUSG00000027952/ENSMUSG00000024525/ENSMUSG00000019139/ENSMUSG00000041939/ENSMUSG00000060733/ENSMUSG00000029413/…	18	ENSMUSG00000036585/ENSMUSG00000032080/ENSMUSG00000027261/ENSMUSG00000041567/ENSMUSG00000032083/ENSMUSG00000056666/ENSMUSG00000028236/ENSMUSG00000015243/ENSMUSG00000028603/ENSMUSG00000024990/ENSMUSG00000034088/ENSMUSG00000023019/ENSMUSG00000027875/ENSMUSG00000028553/ENSMUSG00000028158/ENSMUSG00000039519/ENSMUSG00000032079/ENSMUSG00000012117
BP	GO:0042035	regulation of cytokine biosynthetic process	25|1102	103|14957	7.86231e-08	8.43821e-06	ENSMUSG00000078817/ENSMUSG00000049103/ENSMUSG00000016024/ENSMUSG00000025494/ENSMUSG00000035914/ENSMUSG00000004043/ENSMUSG00000018899/ENSMUSG00000051457/ENSMUSG00000053175/ENSMUSG00000024789/ENSMUSG00000027995/ENSMUSG00000004951/ENSMUSG00000028076/ENSMUSG00000006014/ENSMUSG00000028191/ENSMUSG00000047123/ENSMUSG00000000732/ENSMUSG00000032508/ENSMUSG00000031639/ENSMUSG00000028163/ENSMUSG00000004040/…	Nlrp12/Ccr2/Lbp/Sigirr/Cd276/Stat5a/Irf1/Spn/Bcl3/Jak2/Tlr2/Hspb1/Cd1d1/Prg4/Bcl10/Ticam1/Icosl/Myd88/Tlr3/Nfkb1/Stat3/Tlr1/Il27/Tlr7/Tbk1	25	22	ENSMUSG00000049103/ENSMUSG00000016024/ENSMUSG00000025494/ENSMUSG00000035914/ENSMUSG00000004043/ENSMUSG00000018899/ENSMUSG00000051457/ENSMUSG00000053175/ENSMUSG00000024789/ENSMUSG00000027995/ENSMUSG00000004951/ENSMUSG00000028076/ENSMUSG00000006014/ENSMUSG00000028191/ENSMUSG00000000732/ENSMUSG00000032508/ENSMUSG00000031639/ENSMUSG00000028163/ENSMUSG00000004040/ENSMUSG00000044827/ENSMUSG00000044701/…	3	ENSMUSG00000078817/ENSMUSG00000047123/ENSMUSG00000044583
BP	GO:0032640	tumor necrosis factor production	32|1102	155|14957	7.99914e-08	8.43821e-06	ENSMUSG00000049103/ENSMUSG00000039217/ENSMUSG00000016024/ENSMUSG00000025314/ENSMUSG00000051457/ENSMUSG00000053175/ENSMUSG00000035385/ENSMUSG00000024789/ENSMUSG00000027995/ENSMUSG00000051439/ENSMUSG00000031451/ENSMUSG00000030341/ENSMUSG00000004951/ENSMUSG00000040296/ENSMUSG00000050350/ENSMUSG00000031101/ENSMUSG00000055447/ENSMUSG00000027347/ENSMUSG00000020053/ENSMUSG00000047123/ENSMUSG00000037902/…	Ccr2/Il18/Lbp/Ptprj/Spn/Bcl3/Ccl2/Jak2/Tlr2/Cd14/Gas6/Tnfrsf1a/Hspb1/Ddx58/Gpr18/Sash3/Cd47/Rasgrp1/Igf1/Ticam1/Sirpa/Myd88/Tlr3/Fcer1g/Akap8/Nod2/Tlr1/Pycard/Lgals9/Cyp2j6/Tnfaip3/Gpnmb	32	27	ENSMUSG00000049103/ENSMUSG00000039217/ENSMUSG00000016024/ENSMUSG00000025314/ENSMUSG00000051457/ENSMUSG00000053175/ENSMUSG00000035385/ENSMUSG00000024789/ENSMUSG00000027995/ENSMUSG00000051439/ENSMUSG00000031451/ENSMUSG00000030341/ENSMUSG00000004951/ENSMUSG00000040296/ENSMUSG00000050350/ENSMUSG00000031101/ENSMUSG00000055447/ENSMUSG00000027347/ENSMUSG00000037902/ENSMUSG00000032508/ENSMUSG00000031639/…	5	ENSMUSG00000020053/ENSMUSG00000047123/ENSMUSG00000024045/ENSMUSG00000052914/ENSMUSG00000029816
BP	GO:0002274	myeloid leukocyte activation	37|1102	195|14957	8.11525e-08	8.43821e-06	ENSMUSG00000030560/ENSMUSG00000039699/ENSMUSG00000021948/ENSMUSG00000035186/ENSMUSG00000049103/ENSMUSG00000032193/ENSMUSG00000039217/ENSMUSG00000016024/ENSMUSG00000002983/ENSMUSG00000052270/ENSMUSG00000024789/ENSMUSG00000027995/ENSMUSG00000015599/ENSMUSG00000028874/ENSMUSG00000028076/ENSMUSG00000024300/ENSMUSG00000000290/ENSMUSG00000027347/ENSMUSG00000028191/ENSMUSG00000047123/ENSMUSG00000024397/…	Ctsc/Batf2/Prkcd/Ubd/Ccr2/Ldlr/Il18/Lbp/Relb/Fpr2/Jak2/Tlr2/Ttbk1/Fgr/Cd1d1/Myo1f/Itgb2/Rasgrp1/Bcl10/Ticam1/Aif1/Tlr3/Casp1/Fcer1g/Plscr1/Rac2/Ccl5/Tlr1/Pycard/Lgals9/Kars/Tlr7/Ulbp1/Dock2/Stap1/Ndrg1/Fcgr4	37	33	ENSMUSG00000030560/ENSMUSG00000039699/ENSMUSG00000021948/ENSMUSG00000035186/ENSMUSG00000049103/ENSMUSG00000032193/ENSMUSG00000039217/ENSMUSG00000016024/ENSMUSG00000002983/ENSMUSG00000052270/ENSMUSG00000024789/ENSMUSG00000027995/ENSMUSG00000028874/ENSMUSG00000028076/ENSMUSG00000024300/ENSMUSG00000000290/ENSMUSG00000027347/ENSMUSG00000028191/ENSMUSG00000024397/ENSMUSG00000031639/ENSMUSG00000025888/…	4	ENSMUSG00000015599/ENSMUSG00000047123/ENSMUSG00000044583/ENSMUSG00000029254
BP	GO:0050870	positive regulation of T cell activation	34|1102	171|14957	8.35097e-08	8.50964e-06	ENSMUSG00000068220/ENSMUSG00000042333/ENSMUSG00000049103/ENSMUSG00000039217/ENSMUSG00000038037/ENSMUSG00000039384/ENSMUSG00000035914/ENSMUSG00000004043/ENSMUSG00000039323/ENSMUSG00000018899/ENSMUSG00000051457/ENSMUSG00000035385/ENSMUSG00000115338/ENSMUSG00000016496/ENSMUSG00000028076/ENSMUSG00000031805/ENSMUSG00000040329/ENSMUSG00000031101/ENSMUSG00000055447/ENSMUSG00000027347/ENSMUSG00000028191/…	Lgals1/Tnfrsf14/Ccr2/Il18/Socs1/Dusp10/Cd276/Stat5a/Igfbp2/Irf1/Spn/Ccl2/Pnp/Cd274/Cd1d1/Jak3/Il7/Sash3/Cd47/Rasgrp1/Bcl10/Igf1/Icosl/Coro1a/Sirpa/Aif1/Tnfsf13b/Ccl5/Pycard/Lgals9/Cd5/Hsp90aa1/H2-DMa/Malt1	34	32	ENSMUSG00000068220/ENSMUSG00000042333/ENSMUSG00000049103/ENSMUSG00000039217/ENSMUSG00000038037/ENSMUSG00000039384/ENSMUSG00000035914/ENSMUSG00000004043/ENSMUSG00000018899/ENSMUSG00000051457/ENSMUSG00000035385/ENSMUSG00000115338/ENSMUSG00000016496/ENSMUSG00000028076/ENSMUSG00000031805/ENSMUSG00000040329/ENSMUSG00000031101/ENSMUSG00000055447/ENSMUSG00000027347/ENSMUSG00000028191/ENSMUSG00000000732/…	2	ENSMUSG00000039323/ENSMUSG00000020053
BP	GO:0022409	positive regulation of cell-cell adhesion	40|1102	221|14957	9.38761e-08	9.37841e-06	ENSMUSG00000068220/ENSMUSG00000042333/ENSMUSG00000049103/ENSMUSG00000037405/ENSMUSG00000039217/ENSMUSG00000027009/ENSMUSG00000038037/ENSMUSG00000039384/ENSMUSG00000028517/ENSMUSG00000035914/ENSMUSG00000004043/ENSMUSG00000039323/ENSMUSG00000018899/ENSMUSG00000051457/ENSMUSG00000035385/ENSMUSG00000115338/ENSMUSG00000024942/ENSMUSG00000016496/ENSMUSG00000028076/ENSMUSG00000031805/ENSMUSG00000040329/…	Lgals1/Tnfrsf14/Ccr2/Icam1/Il18/Itga4/Socs1/Dusp10/Plpp3/Cd276/Stat5a/Igfbp2/Irf1/Spn/Ccl2/Pnp/Capn1/Cd274/Cd1d1/Jak3/Il7/Flot1/Sash3/Itgb2/Cd47/Rasgrp1/Bcl10/Igf1/Icosl/Coro1a/Sirpa/Aif1/Tnfsf13b/Ccl5/Pycard/Lgals9/Cd5/Hsp90aa1/H2-DMa/Malt1	40	37	ENSMUSG00000068220/ENSMUSG00000042333/ENSMUSG00000049103/ENSMUSG00000037405/ENSMUSG00000039217/ENSMUSG00000027009/ENSMUSG00000038037/ENSMUSG00000039384/ENSMUSG00000035914/ENSMUSG00000004043/ENSMUSG00000018899/ENSMUSG00000051457/ENSMUSG00000035385/ENSMUSG00000115338/ENSMUSG00000024942/ENSMUSG00000016496/ENSMUSG00000028076/ENSMUSG00000031805/ENSMUSG00000040329/ENSMUSG00000059714/ENSMUSG00000031101/…	3	ENSMUSG00000028517/ENSMUSG00000039323/ENSMUSG00000020053
BP	GO:0001562	response to protozoan	14|1102	36|14957	1.04322e-07	1.02215e-05	ENSMUSG00000069874/ENSMUSG00000092021/ENSMUSG00000039699/ENSMUSG00000105096/ENSMUSG00000028270/ENSMUSG00000104713/ENSMUSG00000041515/ENSMUSG00000054072/ENSMUSG00000051457/ENSMUSG00000053175/ENSMUSG00000028268/ENSMUSG00000040253/ENSMUSG00000029298/ENSMUSG00000034438	Irgm2/Gbp11/Batf2/Gbp10/Gbp2/Gbp6/Irf8/Iigp1/Spn/Bcl3/Gbp3/Gbp7/Gbp9/Gbp8	14	14	ENSMUSG00000069874/ENSMUSG00000092021/ENSMUSG00000039699/ENSMUSG00000105096/ENSMUSG00000028270/ENSMUSG00000104713/ENSMUSG00000041515/ENSMUSG00000054072/ENSMUSG00000051457/ENSMUSG00000053175/ENSMUSG00000028268/ENSMUSG00000040253/ENSMUSG00000029298/ENSMUSG00000034438	0
BP	GO:0050863	regulation of T cell activation	46|1102	274|14957	1.09608e-07	1.05368e-05	ENSMUSG00000031628/ENSMUSG00000068220/ENSMUSG00000042333/ENSMUSG00000049103/ENSMUSG00000039217/ENSMUSG00000038037/ENSMUSG00000039384/ENSMUSG00000031594/ENSMUSG00000035914/ENSMUSG00000004043/ENSMUSG00000039323/ENSMUSG00000018899/ENSMUSG00000051457/ENSMUSG00000035385/ENSMUSG00000115338/ENSMUSG00000016496/ENSMUSG00000028076/ENSMUSG00000031805/ENSMUSG00000040329/ENSMUSG00000039981/ENSMUSG00000031101/…	Casp3/Lgals1/Tnfrsf14/Ccr2/Il18/Socs1/Dusp10/Fgl1/Cd276/Stat5a/Igfbp2/Irf1/Spn/Ccl2/Pnp/Cd274/Cd1d1/Jak3/Il7/Zc3h12d/Sash3/Cd47/Rasgrp1/Bcl10/Igf1/Icosl/Coro1a/Sirpa/Aif1/Braf/Tnfsf13b/Lgals3/Rac2/Fanca/Ccl5/Vsig4/Slfn1/Il27/Pycard/Lgals9/Cd5/Adora2a/Hsp90aa1/H2-DMa/Malt1/Gpnmb	46	41	ENSMUSG00000031628/ENSMUSG00000068220/ENSMUSG00000042333/ENSMUSG00000049103/ENSMUSG00000039217/ENSMUSG00000038037/ENSMUSG00000039384/ENSMUSG00000031594/ENSMUSG00000035914/ENSMUSG00000004043/ENSMUSG00000018899/ENSMUSG00000051457/ENSMUSG00000035385/ENSMUSG00000115338/ENSMUSG00000016496/ENSMUSG00000028076/ENSMUSG00000031805/ENSMUSG00000040329/ENSMUSG00000039981/ENSMUSG00000031101/ENSMUSG00000055447/…	5	ENSMUSG00000039323/ENSMUSG00000020053/ENSMUSG00000002413/ENSMUSG00000044206/ENSMUSG00000029816
BP	GO:0032496	response to lipopolysaccharide	42|1102	240|14957	1.20088e-07	1.13306e-05	ENSMUSG00000029417/ENSMUSG00000069874/ENSMUSG00000026728/ENSMUSG00000022126/ENSMUSG00000020826/ENSMUSG00000020638/ENSMUSG00000105096/ENSMUSG00000021624/ENSMUSG00000039217/ENSMUSG00000028270/ENSMUSG00000039384/ENSMUSG00000016024/ENSMUSG00000104713/ENSMUSG00000041515/ENSMUSG00000026104/ENSMUSG00000035385/ENSMUSG00000052837/ENSMUSG00000024789/ENSMUSG00000016496/ENSMUSG00000015243/ENSMUSG00000051439/…	Cxcl9/Irgm2/Vim/Acod1/Nos2/Cmpk2/Gbp10/Cd180/Il18/Gbp2/Dusp10/Lbp/Gbp6/Irf8/Stat1/Ccl2/Junb/Jak2/Cd274/Abca1/Cd14/Cxcl10/Hmgb2/Bcl10/Ticam1/Sirpa/Myd88/Casp1/Plcg2/Plscr1/Nfkb1/Akap8/Nod2/Ccl5/Pycard/Lgals9/Il1rn/Gch1/Stap1/Tnfaip3/Fcgr4/Malt1	42	38	ENSMUSG00000029417/ENSMUSG00000069874/ENSMUSG00000026728/ENSMUSG00000022126/ENSMUSG00000020826/ENSMUSG00000020638/ENSMUSG00000105096/ENSMUSG00000021624/ENSMUSG00000039217/ENSMUSG00000028270/ENSMUSG00000039384/ENSMUSG00000016024/ENSMUSG00000104713/ENSMUSG00000041515/ENSMUSG00000026104/ENSMUSG00000035385/ENSMUSG00000052837/ENSMUSG00000024789/ENSMUSG00000016496/ENSMUSG00000051439/ENSMUSG00000034855/…	4	ENSMUSG00000015243/ENSMUSG00000047123/ENSMUSG00000024045/ENSMUSG00000029254
BP	GO:0002237	response to molecule of bacterial origin	44|1102	258|14957	1.30206e-07	1.20619e-05	ENSMUSG00000029417/ENSMUSG00000069874/ENSMUSG00000026728/ENSMUSG00000022126/ENSMUSG00000020826/ENSMUSG00000020638/ENSMUSG00000105096/ENSMUSG00000021624/ENSMUSG00000039217/ENSMUSG00000028270/ENSMUSG00000039384/ENSMUSG00000016024/ENSMUSG00000104713/ENSMUSG00000041515/ENSMUSG00000026104/ENSMUSG00000035385/ENSMUSG00000052837/ENSMUSG00000024789/ENSMUSG00000027995/ENSMUSG00000016496/ENSMUSG00000015243/…	Cxcl9/Irgm2/Vim/Acod1/Nos2/Cmpk2/Gbp10/Cd180/Il18/Gbp2/Dusp10/Lbp/Gbp6/Irf8/Stat1/Ccl2/Junb/Jak2/Tlr2/Cd274/Abca1/Cd14/Cxcl10/Hmgb2/Bcl10/Ticam1/Sirpa/Myd88/Casp1/Plcg2/Plscr1/Nfkb1/Akap8/Nod2/Ccl5/Tlr1/Pycard/Lgals9/Il1rn/Gch1/Stap1/Tnfaip3/Fcgr4/Malt1	44	40	ENSMUSG00000029417/ENSMUSG00000069874/ENSMUSG00000026728/ENSMUSG00000022126/ENSMUSG00000020826/ENSMUSG00000020638/ENSMUSG00000105096/ENSMUSG00000021624/ENSMUSG00000039217/ENSMUSG00000028270/ENSMUSG00000039384/ENSMUSG00000016024/ENSMUSG00000104713/ENSMUSG00000041515/ENSMUSG00000026104/ENSMUSG00000035385/ENSMUSG00000052837/ENSMUSG00000024789/ENSMUSG00000027995/ENSMUSG00000016496/ENSMUSG00000051439/…	4	ENSMUSG00000015243/ENSMUSG00000047123/ENSMUSG00000024045/ENSMUSG00000029254
BP	GO:0019221	cytokine-mediated signaling pathway	47|1102	285|14957	1.38715e-07	1.26205e-05	ENSMUSG00000025498/ENSMUSG00000030895/ENSMUSG00000074151/ENSMUSG00000029417/ENSMUSG00000026072/ENSMUSG00000069874/ENSMUSG00000025492/ENSMUSG00000050069/ENSMUSG00000049103/ENSMUSG00000034422/ENSMUSG00000068452/ENSMUSG00000039217/ENSMUSG00000038037/ENSMUSG00000027514/ENSMUSG00000054072/ENSMUSG00000026104/ENSMUSG00000025494/ENSMUSG00000040033/ENSMUSG00000032083/ENSMUSG00000004043/ENSMUSG00000046879/…	Irf7/Hpx/Nlrc5/Cxcl9/Il1r1/Irgm2/Ifitm3/Grem2/Ccr2/Parp14/Duox2/Il18/Socs1/Zbp1/Iigp1/Stat1/Sigirr/Stat2/Apoa1/Stat5a/Irgm1/Irf1/Ccl2/Jak2/Gpr35/Acsl1/Gas6/Tnfrsf1a/Jak3/Cxcl10/Krt8/Il7/Ifitm2/Myd88/Casp1/Klf6/Fcer1g/Stat3/Ccl5/Il1rap/Pycard/Kars/Ccr1/Il1rn/Tbk1/Stap1/Il2rb	47	41	ENSMUSG00000025498/ENSMUSG00000030895/ENSMUSG00000074151/ENSMUSG00000029417/ENSMUSG00000069874/ENSMUSG00000025492/ENSMUSG00000049103/ENSMUSG00000034422/ENSMUSG00000068452/ENSMUSG00000039217/ENSMUSG00000038037/ENSMUSG00000027514/ENSMUSG00000054072/ENSMUSG00000026104/ENSMUSG00000025494/ENSMUSG00000040033/ENSMUSG00000004043/ENSMUSG00000046879/ENSMUSG00000018899/ENSMUSG00000035385/ENSMUSG00000024789/…	6	ENSMUSG00000026072/ENSMUSG00000050069/ENSMUSG00000032083/ENSMUSG00000018796/ENSMUSG00000022514/ENSMUSG00000029254
BP	GO:0032760	positive regulation of tumor necrosis factor production	23|1102	92|14957	1.44827e-07	1.27625e-05	ENSMUSG00000049103/ENSMUSG00000039217/ENSMUSG00000016024/ENSMUSG00000025314/ENSMUSG00000051457/ENSMUSG00000035385/ENSMUSG00000024789/ENSMUSG00000027995/ENSMUSG00000051439/ENSMUSG00000030341/ENSMUSG00000004951/ENSMUSG00000040296/ENSMUSG00000031101/ENSMUSG00000027347/ENSMUSG00000047123/ENSMUSG00000032508/ENSMUSG00000031639/ENSMUSG00000058715/ENSMUSG00000055994/ENSMUSG00000044827/ENSMUSG00000030793/…	Ccr2/Il18/Lbp/Ptprj/Spn/Ccl2/Jak2/Tlr2/Cd14/Tnfrsf1a/Hspb1/Ddx58/Sash3/Rasgrp1/Ticam1/Myd88/Tlr3/Fcer1g/Nod2/Tlr1/Pycard/Lgals9/Cyp2j6	23	21	ENSMUSG00000049103/ENSMUSG00000039217/ENSMUSG00000016024/ENSMUSG00000025314/ENSMUSG00000051457/ENSMUSG00000035385/ENSMUSG00000024789/ENSMUSG00000027995/ENSMUSG00000051439/ENSMUSG00000030341/ENSMUSG00000004951/ENSMUSG00000040296/ENSMUSG00000031101/ENSMUSG00000027347/ENSMUSG00000032508/ENSMUSG00000031639/ENSMUSG00000058715/ENSMUSG00000055994/ENSMUSG00000044827/ENSMUSG00000030793/ENSMUSG00000001123	2	ENSMUSG00000047123/ENSMUSG00000052914
BP	GO:0002526	acute inflammatory response	24|1102	99|14957	1.46065e-07	1.27625e-05	ENSMUSG00000040026/ENSMUSG00000057465/ENSMUSG00000074115/ENSMUSG00000061540/ENSMUSG00000031722/ENSMUSG00000022181/ENSMUSG00000037405/ENSMUSG00000008845/ENSMUSG00000016024/ENSMUSG00000015947/ENSMUSG00000025494/ENSMUSG00000051457/ENSMUSG00000045827/ENSMUSG00000039196/ENSMUSG00000042429/ENSMUSG00000027997/ENSMUSG00000058715/ENSMUSG00000032369/ENSMUSG00000004040/ENSMUSG00000035042/ENSMUSG00000044206/…	Saa3/Saa2/Saa1/Orm2/Hp/C6/Icam1/Cd163/Lbp/Fcgr1/Sigirr/Spn/Serpinb9/Orm1/Adora1/Casp6/Fcer1g/Plscr1/Stat3/Ccl5/Vsig4/Il1rn/F2/Ahsg	24	19	ENSMUSG00000040026/ENSMUSG00000057465/ENSMUSG00000074115/ENSMUSG00000061540/ENSMUSG00000031722/ENSMUSG00000037405/ENSMUSG00000016024/ENSMUSG00000015947/ENSMUSG00000025494/ENSMUSG00000051457/ENSMUSG00000045827/ENSMUSG00000039196/ENSMUSG00000042429/ENSMUSG00000027997/ENSMUSG00000058715/ENSMUSG00000032369/ENSMUSG00000004040/ENSMUSG00000035042/ENSMUSG00000026981	5	ENSMUSG00000022181/ENSMUSG00000008845/ENSMUSG00000044206/ENSMUSG00000027249/ENSMUSG00000022868
BP	GO:0002685	regulation of leukocyte migration	35|1102	183|14957	1.47789e-07	1.27625e-05	ENSMUSG00000026072/ENSMUSG00000042333/ENSMUSG00000049103/ENSMUSG00000037405/ENSMUSG00000027009/ENSMUSG00000016024/ENSMUSG00000037362/ENSMUSG00000025314/ENSMUSG00000051457/ENSMUSG00000035385/ENSMUSG00000052270/ENSMUSG00000027995/ENSMUSG00000031207/ENSMUSG00000024942/ENSMUSG00000031451/ENSMUSG00000034855/ENSMUSG00000050350/ENSMUSG00000053318/ENSMUSG00000023913/ENSMUSG00000029163/ENSMUSG00000042429/…	Il1r1/Tnfrsf14/Ccr2/Icam1/Itga4/Lbp/Nov/Ptprj/Spn/Ccl2/Fpr2/Tlr2/Msn/Capn1/Gas6/Cxcl10/Gpr18/Slamf8/Pla2g7/Emilin1/Adora1/Myd88/Aif1/Lgals3/Rac2/Nod2/Ccl5/Pycard/Lgals9/Kars/Ccr1/Bst1/Stap1/Camk1d/Slc8b1	35	32	ENSMUSG00000042333/ENSMUSG00000049103/ENSMUSG00000037405/ENSMUSG00000027009/ENSMUSG00000016024/ENSMUSG00000037362/ENSMUSG00000025314/ENSMUSG00000051457/ENSMUSG00000035385/ENSMUSG00000052270/ENSMUSG00000027995/ENSMUSG00000031207/ENSMUSG00000024942/ENSMUSG00000031451/ENSMUSG00000034855/ENSMUSG00000050350/ENSMUSG00000053318/ENSMUSG00000029163/ENSMUSG00000042429/ENSMUSG00000032508/ENSMUSG00000024397/…	3	ENSMUSG00000026072/ENSMUSG00000023913/ENSMUSG00000029254
BP	GO:0032609	interferon-gamma production	25|1102	107|14957	1.74324e-07	1.46652e-05	ENSMUSG00000026072/ENSMUSG00000001750/ENSMUSG00000049103/ENSMUSG00000039217/ENSMUSG00000041515/ENSMUSG00000035914/ENSMUSG00000051457/ENSMUSG00000053175/ENSMUSG00000016496/ENSMUSG00000051439/ENSMUSG00000031451/ENSMUSG00000028793/ENSMUSG00000035692/ENSMUSG00000028076/ENSMUSG00000031101/ENSMUSG00000055447/ENSMUSG00000027347/ENSMUSG00000037902/ENSMUSG00000031639/ENSMUSG00000055994/ENSMUSG00000044701/…	Il1r1/Tcirg1/Ccr2/Il18/Irf8/Cd276/Spn/Bcl3/Cd274/Cd14/Gas6/Rnf19b/Isg15/Cd1d1/Sash3/Cd47/Rasgrp1/Sirpa/Tlr3/Nod2/Il27/Pycard/Lgals9/Tlr7/Ulbp1	25	23	ENSMUSG00000001750/ENSMUSG00000049103/ENSMUSG00000039217/ENSMUSG00000041515/ENSMUSG00000035914/ENSMUSG00000051457/ENSMUSG00000053175/ENSMUSG00000016496/ENSMUSG00000051439/ENSMUSG00000031451/ENSMUSG00000028793/ENSMUSG00000035692/ENSMUSG00000028076/ENSMUSG00000031101/ENSMUSG00000055447/ENSMUSG00000027347/ENSMUSG00000037902/ENSMUSG00000031639/ENSMUSG00000055994/ENSMUSG00000044701/ENSMUSG00000030793/…	2	ENSMUSG00000026072/ENSMUSG00000044583
BP	GO:0051186	cofactor metabolic process	66|1102	465|14957	1.75579e-07	1.46652e-05	ENSMUSG00000030895/ENSMUSG00000031722/ENSMUSG00000042102/ENSMUSG00000022742/ENSMUSG00000017390/ENSMUSG00000039616/ENSMUSG00000015806/ENSMUSG00000032350/ENSMUSG00000032080/ENSMUSG00000058135/ENSMUSG00000068452/ENSMUSG00000057228/ENSMUSG00000025190/ENSMUSG00000020917/ENSMUSG00000058216/ENSMUSG00000037847/ENSMUSG00000068762/ENSMUSG00000034450/ENSMUSG00000024556/ENSMUSG00000025934/ENSMUSG00000028671/…	Hpx/Hp/Dmgdh/Cpox/Aldoc/Mocos/Qdpr/Gclc/Apoa4/Gstm1/Duox2/Aadat/Got1/Acly/Gstp3/Nmrk1/Gstm6/Gulo/Me2/Gsta3/Gale/Hk2/Acacb/Acat1/Abcd1/Acsl1/Slc2a6/Scp2/mt-Co2/Pmvk/Pkm/Acot1/Mvk/Gsta2/Pgd/Aldh1l1/Pdk3/Igf1/Hk3/Far1/Tkt/Bdh2/Gpd1/Hmgcs2/Pklr/Coq8b/Gstp2/Acss2/Phyh/Hmgcs1/Adpgk/Stat3/Pank4/Hk1/Mmachc/Mmab/Gstm4/Pfkp/Gch1/Acsm3/Idh1/Atpif1/Gck/Hbb-bs/Acot12/Nat8	66	43	ENSMUSG00000030895/ENSMUSG00000031722/ENSMUSG00000017390/ENSMUSG00000039616/ENSMUSG00000015806/ENSMUSG00000032350/ENSMUSG00000058135/ENSMUSG00000068452/ENSMUSG00000025190/ENSMUSG00000020917/ENSMUSG00000068762/ENSMUSG00000024556/ENSMUSG00000025934/ENSMUSG00000028671/ENSMUSG00000000628/ENSMUSG00000042010/ENSMUSG00000031378/ENSMUSG00000036067/ENSMUSG00000064354/ENSMUSG00000027952/ENSMUSG00000032294/…	23	ENSMUSG00000042102/ENSMUSG00000022742/ENSMUSG00000032080/ENSMUSG00000057228/ENSMUSG00000058216/ENSMUSG00000037847/ENSMUSG00000034450/ENSMUSG00000032047/ENSMUSG00000018796/ENSMUSG00000028603/ENSMUSG00000072949/ENSMUSG00000020053/ENSMUSG00000023019/ENSMUSG00000027875/ENSMUSG00000041237/ENSMUSG00000026664/ENSMUSG00000025236/ENSMUSG00000029056/ENSMUSG00000028690/ENSMUSG00000030935/ENSMUSG00000041798/…
BP	GO:1903557	positive regulation of tumor necrosis factor superfamily cytokine production	23|1102	93|14957	1.79179e-07	1.47244e-05	ENSMUSG00000049103/ENSMUSG00000039217/ENSMUSG00000016024/ENSMUSG00000025314/ENSMUSG00000051457/ENSMUSG00000035385/ENSMUSG00000024789/ENSMUSG00000027995/ENSMUSG00000051439/ENSMUSG00000030341/ENSMUSG00000004951/ENSMUSG00000040296/ENSMUSG00000031101/ENSMUSG00000027347/ENSMUSG00000047123/ENSMUSG00000032508/ENSMUSG00000031639/ENSMUSG00000058715/ENSMUSG00000055994/ENSMUSG00000044827/ENSMUSG00000030793/…	Ccr2/Il18/Lbp/Ptprj/Spn/Ccl2/Jak2/Tlr2/Cd14/Tnfrsf1a/Hspb1/Ddx58/Sash3/Rasgrp1/Ticam1/Myd88/Tlr3/Fcer1g/Nod2/Tlr1/Pycard/Lgals9/Cyp2j6	23	21	ENSMUSG00000049103/ENSMUSG00000039217/ENSMUSG00000016024/ENSMUSG00000025314/ENSMUSG00000051457/ENSMUSG00000035385/ENSMUSG00000024789/ENSMUSG00000027995/ENSMUSG00000051439/ENSMUSG00000030341/ENSMUSG00000004951/ENSMUSG00000040296/ENSMUSG00000031101/ENSMUSG00000027347/ENSMUSG00000032508/ENSMUSG00000031639/ENSMUSG00000058715/ENSMUSG00000055994/ENSMUSG00000044827/ENSMUSG00000030793/ENSMUSG00000001123	2	ENSMUSG00000047123/ENSMUSG00000052914
BP	GO:0050663	cytokine secretion	39|1102	218|14957	1.86331e-07	1.50691e-05	ENSMUSG00000078817/ENSMUSG00000001750/ENSMUSG00000036986/ENSMUSG00000042333/ENSMUSG00000020826/ENSMUSG00000038037/ENSMUSG00000036908/ENSMUSG00000029915/ENSMUSG00000064246/ENSMUSG00000035914/ENSMUSG00000022575/ENSMUSG00000032083/ENSMUSG00000031934/ENSMUSG00000027995/ENSMUSG00000016496/ENSMUSG00000028874/ENSMUSG00000015243/ENSMUSG00000051439/ENSMUSG00000031451/ENSMUSG00000040296/ENSMUSG00000028793/…	Nlrp12/Tcirg1/Pml/Tnfrsf14/Nos2/Socs1/Unc93b1/Clec5a/Chil1/Cd276/Gsdmd/Apoa1/Panx1/Tlr2/Cd274/Fgr/Abca1/Cd14/Gas6/Ddx58/Rnf19b/Isg15/Rasgrp1/Nlrp1b/Il17rc/Aif1/Casp1/Ubr5/Gbp5/Nod2/Tlr1/Hk1/Il1rap/Pycard/Lgals9/Kars/Nlrc4/Cyp2j6/Tnfaip3	39	33	ENSMUSG00000001750/ENSMUSG00000036986/ENSMUSG00000042333/ENSMUSG00000020826/ENSMUSG00000038037/ENSMUSG00000036908/ENSMUSG00000029915/ENSMUSG00000064246/ENSMUSG00000035914/ENSMUSG00000022575/ENSMUSG00000031934/ENSMUSG00000027995/ENSMUSG00000016496/ENSMUSG00000028874/ENSMUSG00000051439/ENSMUSG00000031451/ENSMUSG00000040296/ENSMUSG00000028793/ENSMUSG00000035692/ENSMUSG00000027347/ENSMUSG00000070390/…	6	ENSMUSG00000078817/ENSMUSG00000032083/ENSMUSG00000015243/ENSMUSG00000037487/ENSMUSG00000022514/ENSMUSG00000052914
BP	GO:0050701	interleukin-1 secretion	16|1102	49|14957	2.21908e-07	1.7666e-05	ENSMUSG00000078817/ENSMUSG00000036986/ENSMUSG00000022575/ENSMUSG00000032083/ENSMUSG00000031934/ENSMUSG00000027995/ENSMUSG00000015243/ENSMUSG00000031451/ENSMUSG00000070390/ENSMUSG00000025888/ENSMUSG00000105504/ENSMUSG00000055994/ENSMUSG00000037012/ENSMUSG00000030793/ENSMUSG00000039193/ENSMUSG00000019850	Nlrp12/Pml/Gsdmd/Apoa1/Panx1/Tlr2/Abca1/Gas6/Nlrp1b/Casp1/Gbp5/Nod2/Hk1/Pycard/Nlrc4/Tnfaip3	16	13	ENSMUSG00000036986/ENSMUSG00000022575/ENSMUSG00000031934/ENSMUSG00000027995/ENSMUSG00000031451/ENSMUSG00000070390/ENSMUSG00000025888/ENSMUSG00000105504/ENSMUSG00000055994/ENSMUSG00000037012/ENSMUSG00000030793/ENSMUSG00000039193/ENSMUSG00000019850	3	ENSMUSG00000078817/ENSMUSG00000032083/ENSMUSG00000015243
BP	GO:0035634	response to stilbenoid	10|1102	19|14957	2.26176e-07	1.77287e-05	ENSMUSG00000040026/ENSMUSG00000057465/ENSMUSG00000074896/ENSMUSG00000032080/ENSMUSG00000030107/ENSMUSG00000031594/ENSMUSG00000057933/ENSMUSG00000067144/ENSMUSG00000078683/ENSMUSG00000058258	Saa3/Saa2/Ifit3/Apoa4/Usp18/Fgl1/Gsta2/Slc22a7/Mup1/Idi1	10	7	ENSMUSG00000040026/ENSMUSG00000057465/ENSMUSG00000074896/ENSMUSG00000030107/ENSMUSG00000031594/ENSMUSG00000057933/ENSMUSG00000058258	3	ENSMUSG00000032080/ENSMUSG00000067144/ENSMUSG00000078683
BP	GO:0042832	defense response to protozoan	13|1102	33|14957	2.50307e-07	1.93229e-05	ENSMUSG00000069874/ENSMUSG00000092021/ENSMUSG00000039699/ENSMUSG00000105096/ENSMUSG00000028270/ENSMUSG00000104713/ENSMUSG00000041515/ENSMUSG00000054072/ENSMUSG00000053175/ENSMUSG00000028268/ENSMUSG00000040253/ENSMUSG00000029298/ENSMUSG00000034438	Irgm2/Gbp11/Batf2/Gbp10/Gbp2/Gbp6/Irf8/Iigp1/Bcl3/Gbp3/Gbp7/Gbp9/Gbp8	13	13	ENSMUSG00000069874/ENSMUSG00000092021/ENSMUSG00000039699/ENSMUSG00000105096/ENSMUSG00000028270/ENSMUSG00000104713/ENSMUSG00000041515/ENSMUSG00000054072/ENSMUSG00000053175/ENSMUSG00000028268/ENSMUSG00000040253/ENSMUSG00000029298/ENSMUSG00000034438	0
BP	GO:0052548	regulation of endopeptidase activity	46|1102	283|14957	2.90067e-07	2.20581e-05	ENSMUSG00000058207/ENSMUSG00000078817/ENSMUSG00000002083/ENSMUSG00000079197/ENSMUSG00000036986/ENSMUSG00000028039/ENSMUSG00000022216/ENSMUSG00000057789/ENSMUSG00000070436/ENSMUSG00000041567/ENSMUSG00000026104/ENSMUSG00000041481/ENSMUSG00000090877/ENSMUSG00000066363/ENSMUSG00000024778/ENSMUSG00000024789/ENSMUSG00000032000/ENSMUSG00000025887/ENSMUSG00000045827/ENSMUSG00000015599/ENSMUSG00000066361/…	Serpina3k/Nlrp12/Bbc3/Psme2/Pml/Efna3/Psme1/Bak1/Serpinh1/Serpina12/Stat1/Serpina3g/Hspa1b/Serpina3f/Fas/Jak2/Birc3/Casp12/Serpinb9/Ttbk1/Serpina3c/Gas6/S100a9/Map3k5/Serpina3i/Cyfip2/Psmb9/Bcl10/Igf1/Fam162a/Nlrp1b/Serpina6/Casp1/Xiap/Stat3/Tnfsf10/Rack1/Psmb8/Serpina9/Naip2/Pycard/Adora2a/Nlrc4/Malt1/Ahsg/Rps6ka1	46	35	ENSMUSG00000002083/ENSMUSG00000079197/ENSMUSG00000036986/ENSMUSG00000028039/ENSMUSG00000022216/ENSMUSG00000057789/ENSMUSG00000070436/ENSMUSG00000026104/ENSMUSG00000041481/ENSMUSG00000090877/ENSMUSG00000066363/ENSMUSG00000024778/ENSMUSG00000024789/ENSMUSG00000032000/ENSMUSG00000025887/ENSMUSG00000045827/ENSMUSG00000031451/ENSMUSG00000056071/ENSMUSG00000079014/ENSMUSG00000020340/ENSMUSG00000096727/…	11	ENSMUSG00000058207/ENSMUSG00000078817/ENSMUSG00000041567/ENSMUSG00000015599/ENSMUSG00000066361/ENSMUSG00000071369/ENSMUSG00000020053/ENSMUSG00000025860/ENSMUSG00000020372/ENSMUSG00000058260/ENSMUSG00000022868
BP	GO:0050994	regulation of lipid catabolic process	16|1102	50|14957	3.04178e-07	2.2791e-05	ENSMUSG00000026385/ENSMUSG00000055782/ENSMUSG00000030827/ENSMUSG00000021948/ENSMUSG00000032080/ENSMUSG00000032193/ENSMUSG00000042010/ENSMUSG00000031378/ENSMUSG00000032540/ENSMUSG00000042429/ENSMUSG00000021340/ENSMUSG00000028553/ENSMUSG00000011305/ENSMUSG00000032079/ENSMUSG00000045502/ENSMUSG00000025950	Dbi/Abcd2/Fgf21/Prkcd/Apoa4/Ldlr/Acacb/Abcd1/Abhd5/Adora1/Gpld1/Angptl3/Plin5/Apoa5/Hcar2/Idh1	16	9	ENSMUSG00000026385/ENSMUSG00000055782/ENSMUSG00000021948/ENSMUSG00000032193/ENSMUSG00000042010/ENSMUSG00000031378/ENSMUSG00000042429/ENSMUSG00000045502/ENSMUSG00000025950	7	ENSMUSG00000030827/ENSMUSG00000032080/ENSMUSG00000032540/ENSMUSG00000021340/ENSMUSG00000028553/ENSMUSG00000011305/ENSMUSG00000032079
BP	GO:0008202	steroid metabolic process	44|1102	266|14957	3.17567e-07	2.34494e-05	ENSMUSG00000074115/ENSMUSG00000056035/ENSMUSG00000036585/ENSMUSG00000045294/ENSMUSG00000032018/ENSMUSG00000032080/ENSMUSG00000032193/ENSMUSG00000003123/ENSMUSG00000041567/ENSMUSG00000044254/ENSMUSG00000031594/ENSMUSG00000032083/ENSMUSG00000004043/ENSMUSG00000023022/ENSMUSG00000024799/ENSMUSG00000037071/ENSMUSG00000010175/ENSMUSG00000022351/ENSMUSG00000015243/ENSMUSG00000028603/ENSMUSG00000027952/…	Saa1/Cyp3a11/Fgf1/Insig1/Sc5d/Apoa4/Ldlr/Lipe/Serpina12/Pcsk9/Fgl1/Apoa1/Stat5a/Lima1/Tm7sf2/Scd1/Prox1/Sqle/Abca1/Scp2/Pmvk/Mvk/Slc37a4/Cyp2b10/Sgpl1/Igf1/Serpina6/Hdlbp/Erg28/Hmgcs2/Cyp2r1/Angptl3/Lbr/Ywhah/Nsdhl/Tecr/Nfkb1/Hmgcs1/Mttp/Cyp7b1/Hsd3b2/Apoa5/Msmo1/Slc27a2	44	27	ENSMUSG00000074115/ENSMUSG00000056035/ENSMUSG00000045294/ENSMUSG00000032018/ENSMUSG00000032193/ENSMUSG00000003123/ENSMUSG00000044254/ENSMUSG00000031594/ENSMUSG00000004043/ENSMUSG00000023022/ENSMUSG00000024799/ENSMUSG00000037071/ENSMUSG00000022351/ENSMUSG00000027952/ENSMUSG00000041939/ENSMUSG00000030483/ENSMUSG00000020097/ENSMUSG00000060807/ENSMUSG00000021252/ENSMUSG00000030670/ENSMUSG00000004880/…	17	ENSMUSG00000036585/ENSMUSG00000032080/ENSMUSG00000041567/ENSMUSG00000032083/ENSMUSG00000010175/ENSMUSG00000015243/ENSMUSG00000028603/ENSMUSG00000032114/ENSMUSG00000020053/ENSMUSG00000034088/ENSMUSG00000027875/ENSMUSG00000028553/ENSMUSG00000028158/ENSMUSG00000039519/ENSMUSG00000063730/ENSMUSG00000032079/ENSMUSG00000027359
BP	GO:0031348	negative regulation of defense response	36|1102	198|14957	3.64007e-07	2.64945e-05	ENSMUSG00000074151/ENSMUSG00000078817/ENSMUSG00000022126/ENSMUSG00000055782/ENSMUSG00000042726/ENSMUSG00000034422/ENSMUSG00000032193/ENSMUSG00000039384/ENSMUSG00000035914/ENSMUSG00000032083/ENSMUSG00000037362/ENSMUSG00000051457/ENSMUSG00000037321/ENSMUSG00000052270/ENSMUSG00000045827/ENSMUSG00000031378/ENSMUSG00000030157/ENSMUSG00000017830/ENSMUSG00000030341/ENSMUSG00000041939/ENSMUSG00000053318/…	Nlrc5/Nlrp12/Acod1/Abcd2/Trafd1/Parp14/Ldlr/Dusp10/Cd276/Apoa1/Nov/Spn/Tap1/Fpr2/Serpinb9/Abcd1/Clec2d/Dhx58/Tnfrsf1a/Mvk/Slamf8/Igf1/Adora1/Sirpa/Nfkb1/Fem1a/Nod2/Vsig4/Traf3ip1/Pycard/Lgals9/Adora2a/Ccr1/Tnfaip3/Psma1/F2	36	29	ENSMUSG00000074151/ENSMUSG00000022126/ENSMUSG00000055782/ENSMUSG00000042726/ENSMUSG00000034422/ENSMUSG00000032193/ENSMUSG00000039384/ENSMUSG00000035914/ENSMUSG00000037362/ENSMUSG00000051457/ENSMUSG00000037321/ENSMUSG00000052270/ENSMUSG00000045827/ENSMUSG00000031378/ENSMUSG00000030157/ENSMUSG00000017830/ENSMUSG00000030341/ENSMUSG00000041939/ENSMUSG00000053318/ENSMUSG00000042429/ENSMUSG00000037902/…	7	ENSMUSG00000078817/ENSMUSG00000032083/ENSMUSG00000020053/ENSMUSG00000043683/ENSMUSG00000044206/ENSMUSG00000034292/ENSMUSG00000027249
BP	GO:1902653	secondary alcohol biosynthetic process	15|1102	45|14957	3.91088e-07	2.80647e-05	ENSMUSG00000036585/ENSMUSG00000045294/ENSMUSG00000032018/ENSMUSG00000032080/ENSMUSG00000032083/ENSMUSG00000024799/ENSMUSG00000028603/ENSMUSG00000027952/ENSMUSG00000041939/ENSMUSG00000021252/ENSMUSG00000027875/ENSMUSG00000004880/ENSMUSG00000031349/ENSMUSG00000093930/ENSMUSG00000032079	Fgf1/Insig1/Sc5d/Apoa4/Apoa1/Tm7sf2/Scp2/Pmvk/Mvk/Erg28/Hmgcs2/Lbr/Nsdhl/Hmgcs1/Apoa5	15	9	ENSMUSG00000045294/ENSMUSG00000032018/ENSMUSG00000024799/ENSMUSG00000027952/ENSMUSG00000041939/ENSMUSG00000021252/ENSMUSG00000004880/ENSMUSG00000031349/ENSMUSG00000093930	6	ENSMUSG00000036585/ENSMUSG00000032080/ENSMUSG00000032083/ENSMUSG00000028603/ENSMUSG00000027875/ENSMUSG00000032079
BP	GO:0032481	positive regulation of type I interferon production	16|1102	51|14957	4.13143e-07	2.92356e-05	ENSMUSG00000025498/ENSMUSG00000026104/ENSMUSG00000018899/ENSMUSG00000027995/ENSMUSG00000017830/ENSMUSG00000051439/ENSMUSG00000040296/ENSMUSG00000054717/ENSMUSG00000059714/ENSMUSG00000029826/ENSMUSG00000047123/ENSMUSG00000032508/ENSMUSG00000031639/ENSMUSG00000034330/ENSMUSG00000044583/ENSMUSG00000020115	Irf7/Stat1/Irf1/Tlr2/Dhx58/Cd14/Ddx58/Hmgb2/Flot1/Zc3hav1/Ticam1/Myd88/Tlr3/Plcg2/Tlr7/Tbk1	16	14	ENSMUSG00000025498/ENSMUSG00000026104/ENSMUSG00000018899/ENSMUSG00000027995/ENSMUSG00000017830/ENSMUSG00000051439/ENSMUSG00000040296/ENSMUSG00000054717/ENSMUSG00000059714/ENSMUSG00000029826/ENSMUSG00000032508/ENSMUSG00000031639/ENSMUSG00000034330/ENSMUSG00000020115	2	ENSMUSG00000047123/ENSMUSG00000044583
BP	GO:0002443	leukocyte mediated immunity	50|1102	324|14957	4.57206e-07	3.19105e-05	ENSMUSG00000029656/ENSMUSG00000025498/ENSMUSG00000030895/ENSMUSG00000067235/ENSMUSG00000026072/ENSMUSG00000001750/ENSMUSG00000030560/ENSMUSG00000022149/ENSMUSG00000021948/ENSMUSG00000049103/ENSMUSG00000037405/ENSMUSG00000039217/ENSMUSG00000023249/ENSMUSG00000026542/ENSMUSG00000015947/ENSMUSG00000004043/ENSMUSG00000051457/ENSMUSG00000024778/ENSMUSG00000037321/ENSMUSG00000053175/ENSMUSG00000041471/…	C8b/Irf7/Hpx/H2-Q10/Il1r1/Tcirg1/Ctsc/C9/Prkcd/Ccr2/Icam1/Il18/Parp3/Apcs/Fcgr1/Stat5a/Spn/Fas/Tap1/Bcl3/Shld2/Pnp/Tlr2/Serpinb9/Fgr/Clec2d/C8a/Ddx58/Rnf19b/Cd1d1/Jak3/Myo1f/Sash3/Itgb2/Rasgrp1/Bcl10/Ticam1/Icosl/Coro1a/Myd88/Tlr3/Myo1g/Fcer1g/Rac2/Nod2/Lgals9/Ulbp1/H2-DMa/F2/Malt1	50	43	ENSMUSG00000025498/ENSMUSG00000030895/ENSMUSG00000067235/ENSMUSG00000001750/ENSMUSG00000030560/ENSMUSG00000021948/ENSMUSG00000049103/ENSMUSG00000037405/ENSMUSG00000039217/ENSMUSG00000023249/ENSMUSG00000026542/ENSMUSG00000015947/ENSMUSG00000004043/ENSMUSG00000051457/ENSMUSG00000024778/ENSMUSG00000037321/ENSMUSG00000053175/ENSMUSG00000115338/ENSMUSG00000027995/ENSMUSG00000045827/ENSMUSG00000028874/…	7	ENSMUSG00000029656/ENSMUSG00000026072/ENSMUSG00000022149/ENSMUSG00000041471/ENSMUSG00000035031/ENSMUSG00000047123/ENSMUSG00000027249
BP	GO:0052547	regulation of peptidase activity	51|1102	334|14957	4.89496e-07	3.35927e-05	ENSMUSG00000058207/ENSMUSG00000078817/ENSMUSG00000002083/ENSMUSG00000079197/ENSMUSG00000059908/ENSMUSG00000036986/ENSMUSG00000028039/ENSMUSG00000022216/ENSMUSG00000057789/ENSMUSG00000070436/ENSMUSG00000041567/ENSMUSG00000026104/ENSMUSG00000041481/ENSMUSG00000090877/ENSMUSG00000066363/ENSMUSG00000024778/ENSMUSG00000024789/ENSMUSG00000032000/ENSMUSG00000025887/ENSMUSG00000045827/ENSMUSG00000015599/…	Serpina3k/Nlrp12/Bbc3/Psme2/Mug1/Pml/Efna3/Psme1/Bak1/Serpinh1/Serpina12/Stat1/Serpina3g/Hspa1b/Serpina3f/Fas/Jak2/Birc3/Casp12/Serpinb9/Ttbk1/Serpina3c/Gas6/S100a9/Map3k5/Serpina3i/Pzp/Cyfip2/Psmb9/Bcl10/Igf1/Fam162a/Nlrp1b/Serpina6/Casp1/Tfpi/Xiap/Stat3/Tnfsf10/Rack1/Psmb8/Serpina9/Naip2/Pycard/Kars/Adora2a/Nlrc4/Malt1/Ngf/Ahsg/Rps6ka1	51	38	ENSMUSG00000002083/ENSMUSG00000079197/ENSMUSG00000036986/ENSMUSG00000028039/ENSMUSG00000022216/ENSMUSG00000057789/ENSMUSG00000070436/ENSMUSG00000026104/ENSMUSG00000041481/ENSMUSG00000090877/ENSMUSG00000066363/ENSMUSG00000024778/ENSMUSG00000024789/ENSMUSG00000032000/ENSMUSG00000025887/ENSMUSG00000045827/ENSMUSG00000031451/ENSMUSG00000056071/ENSMUSG00000079014/ENSMUSG00000020340/ENSMUSG00000096727/…	13	ENSMUSG00000058207/ENSMUSG00000078817/ENSMUSG00000059908/ENSMUSG00000041567/ENSMUSG00000015599/ENSMUSG00000066361/ENSMUSG00000071369/ENSMUSG00000030359/ENSMUSG00000020053/ENSMUSG00000025860/ENSMUSG00000020372/ENSMUSG00000058260/ENSMUSG00000022868
BP	GO:0006909	phagocytosis	35|1102	192|14957	4.94494e-07	3.35927e-05	ENSMUSG00000026390/ENSMUSG00000049103/ENSMUSG00000025044/ENSMUSG00000032193/ENSMUSG00000037820/ENSMUSG00000016024/ENSMUSG00000041515/ENSMUSG00000015947/ENSMUSG00000032083/ENSMUSG00000025314/ENSMUSG00000035385/ENSMUSG00000052270/ENSMUSG00000031504/ENSMUSG00000027995/ENSMUSG00000028874/ENSMUSG00000015243/ENSMUSG00000031451/ENSMUSG00000004665/ENSMUSG00000000290/ENSMUSG00000055447/ENSMUSG00000030707/…	Marco/Ccr2/Msr1/Ldlr/Tgm2/Lbp/Irf8/Fcgr1/Apoa1/Ptprj/Ccl2/Fpr2/Rab20/Tlr2/Fgr/Abca1/Gas6/Cnn2/Itgb2/Cd47/Coro1a/Sirpa/Myd88/Aif1/Myo1g/Fcer1g/Hck/Nod2/Rack1/Pycard/Dock2/Stap1/Il2rb/Camk1d/Ahsg	35	30	ENSMUSG00000026390/ENSMUSG00000049103/ENSMUSG00000025044/ENSMUSG00000032193/ENSMUSG00000037820/ENSMUSG00000016024/ENSMUSG00000041515/ENSMUSG00000015947/ENSMUSG00000025314/ENSMUSG00000035385/ENSMUSG00000052270/ENSMUSG00000031504/ENSMUSG00000027995/ENSMUSG00000028874/ENSMUSG00000031451/ENSMUSG00000004665/ENSMUSG00000000290/ENSMUSG00000055447/ENSMUSG00000030707/ENSMUSG00000037902/ENSMUSG00000032508/…	5	ENSMUSG00000032083/ENSMUSG00000015243/ENSMUSG00000020372/ENSMUSG00000029254/ENSMUSG00000022868
BP	GO:0045785	positive regulation of cell adhesion	55|1102	372|14957	5.08444e-07	3.40858e-05	ENSMUSG00000022425/ENSMUSG00000068220/ENSMUSG00000042333/ENSMUSG00000049103/ENSMUSG00000037405/ENSMUSG00000039217/ENSMUSG00000027009/ENSMUSG00000038037/ENSMUSG00000037820/ENSMUSG00000039384/ENSMUSG00000028517/ENSMUSG00000028434/ENSMUSG00000035914/ENSMUSG00000032083/ENSMUSG00000004043/ENSMUSG00000039323/ENSMUSG00000025314/ENSMUSG00000018899/ENSMUSG00000051457/ENSMUSG00000035385/ENSMUSG00000001507/…	Enpp2/Lgals1/Tnfrsf14/Ccr2/Icam1/Il18/Itga4/Socs1/Tgm2/Dusp10/Plpp3/Epb41l4b/Cd276/Apoa1/Stat5a/Igfbp2/Ptprj/Irf1/Spn/Ccl2/Itga3/Jak2/Pnp/Capn1/Cd274/Utrn/Cd1d1/Jak3/Nid1/Il7/Flot1/Sash3/Itgb2/Cd47/Emilin1/Rasgrp1/Bcl10/Igf1/Icosl/Coro1a/Sirpa/Aif1/Braf/Tnfsf13b/Ccl5/Pycard/Lgals9/Cd5/Myadm/Hsp90aa1/Smoc1/H2-DMa/Flna/Iqgap1/Malt1	55	46	ENSMUSG00000068220/ENSMUSG00000042333/ENSMUSG00000049103/ENSMUSG00000037405/ENSMUSG00000039217/ENSMUSG00000027009/ENSMUSG00000038037/ENSMUSG00000037820/ENSMUSG00000039384/ENSMUSG00000035914/ENSMUSG00000004043/ENSMUSG00000025314/ENSMUSG00000018899/ENSMUSG00000051457/ENSMUSG00000035385/ENSMUSG00000001507/ENSMUSG00000024789/ENSMUSG00000115338/ENSMUSG00000024942/ENSMUSG00000016496/ENSMUSG00000028076/…	9	ENSMUSG00000022425/ENSMUSG00000028517/ENSMUSG00000028434/ENSMUSG00000032083/ENSMUSG00000039323/ENSMUSG00000019820/ENSMUSG00000020053/ENSMUSG00000002413/ENSMUSG00000021136
BP	GO:0044419	interspecies interaction between organisms	51|1102	338|14957	7.08018e-07	4.68487e-05	ENSMUSG00000020914/ENSMUSG00000046718/ENSMUSG00000069874/ENSMUSG00000068220/ENSMUSG00000025492/ENSMUSG00000036986/ENSMUSG00000042333/ENSMUSG00000020826/ENSMUSG00000057789/ENSMUSG00000037405/ENSMUSG00000027514/ENSMUSG00000028270/ENSMUSG00000052776/ENSMUSG00000104713/ENSMUSG00000026542/ENSMUSG00000026641/ENSMUSG00000032231/ENSMUSG00000025130/ENSMUSG00000009585/ENSMUSG00000026104/ENSMUSG00000022575/…	Top2a/Bst2/Irgm2/Lgals1/Ifitm3/Pml/Tnfrsf14/Nos2/Bak1/Icam1/Zbp1/Gbp2/Oas1a/Gbp6/Apcs/Usf1/Anxa2/P4hb/Apobec3/Stat1/Gsdmd/Irgm1/Gbp3/Oasl2/Ccl2/Prox1/Tlr2/Gbp7/Serpinb9/Gas6/Gbp9/S100a9/Isg15/Eif3a/Ifitm2/Zc3hav1/Thoc2/Fuca2/Hsp90ab1/Ppib/Parp10/Plscr1/Ccl5/Oas3/Mpeg1/Atg16l2/Pabpc1/Ddb1/Hamp2/F2/Chmp4b	51	43	ENSMUSG00000020914/ENSMUSG00000046718/ENSMUSG00000069874/ENSMUSG00000068220/ENSMUSG00000025492/ENSMUSG00000036986/ENSMUSG00000042333/ENSMUSG00000020826/ENSMUSG00000057789/ENSMUSG00000037405/ENSMUSG00000027514/ENSMUSG00000028270/ENSMUSG00000052776/ENSMUSG00000104713/ENSMUSG00000026542/ENSMUSG00000026641/ENSMUSG00000032231/ENSMUSG00000009585/ENSMUSG00000026104/ENSMUSG00000022575/ENSMUSG00000046879/…	8	ENSMUSG00000025130/ENSMUSG00000010175/ENSMUSG00000024991/ENSMUSG00000037475/ENSMUSG00000032383/ENSMUSG00000022283/ENSMUSG00000024740/ENSMUSG00000027249
BP	GO:0032103	positive regulation of response to external stimulus	44|1102	274|14957	7.38669e-07	4.82502e-05	ENSMUSG00000022126/ENSMUSG00000030560/ENSMUSG00000049103/ENSMUSG00000032193/ENSMUSG00000021624/ENSMUSG00000037820/ENSMUSG00000016024/ENSMUSG00000015947/ENSMUSG00000020122/ENSMUSG00000004043/ENSMUSG00000023088/ENSMUSG00000025314/ENSMUSG00000035385/ENSMUSG00000052270/ENSMUSG00000024789/ENSMUSG00000027995/ENSMUSG00000015599/ENSMUSG00000017830/ENSMUSG00000031451/ENSMUSG00000030341/ENSMUSG00000056071/…	Acod1/Ctsc/Ccr2/Ldlr/Cd180/Tgm2/Lbp/Fcgr1/Egfr/Stat5a/Abcc1/Ptprj/Ccl2/Fpr2/Jak2/Tlr2/Ttbk1/Dhx58/Gas6/Tnfrsf1a/S100a9/Hspb1/Cxcl10/Pla2g7/Cd47/Zc3hav1/Il17rc/Ticam1/Myd88/Aif1/Tlr3/Braf/Fcer1g/Rac2/Gbp5/Ddx60/Nod2/Ccl5/Lgals9/Kars/Ccr1/Tbk1/Stap1/Camk1d	44	38	ENSMUSG00000022126/ENSMUSG00000030560/ENSMUSG00000049103/ENSMUSG00000032193/ENSMUSG00000021624/ENSMUSG00000037820/ENSMUSG00000016024/ENSMUSG00000015947/ENSMUSG00000004043/ENSMUSG00000023088/ENSMUSG00000025314/ENSMUSG00000035385/ENSMUSG00000052270/ENSMUSG00000024789/ENSMUSG00000027995/ENSMUSG00000017830/ENSMUSG00000031451/ENSMUSG00000030341/ENSMUSG00000056071/ENSMUSG00000004951/ENSMUSG00000034855/…	6	ENSMUSG00000020122/ENSMUSG00000015599/ENSMUSG00000023913/ENSMUSG00000047123/ENSMUSG00000002413/ENSMUSG00000029254
BP	GO:0042098	T cell proliferation	34|1102	188|14957	8.67959e-07	5.59779e-05	ENSMUSG00000031628/ENSMUSG00000042333/ENSMUSG00000049103/ENSMUSG00000039217/ENSMUSG00000035914/ENSMUSG00000004043/ENSMUSG00000039323/ENSMUSG00000018899/ENSMUSG00000051457/ENSMUSG00000031897/ENSMUSG00000115338/ENSMUSG00000031207/ENSMUSG00000016496/ENSMUSG00000028076/ENSMUSG00000031805/ENSMUSG00000039981/ENSMUSG00000031101/ENSMUSG00000000290/ENSMUSG00000020053/ENSMUSG00000000732/ENSMUSG00000030707/…	Casp3/Tnfrsf14/Ccr2/Il18/Cd276/Stat5a/Igfbp2/Irf1/Spn/Psmb10/Pnp/Msn/Cd274/Cd1d1/Jak3/Zc3h12d/Sash3/Itgb2/Igf1/Icosl/Coro1a/Aif1/Tnfsf13b/Lgals3/Rac2/Ccl5/Vsig4/Slfn1/Il27/Pycard/Lgals9/Dock2/Malt1/Gpnmb	34	30	ENSMUSG00000031628/ENSMUSG00000042333/ENSMUSG00000049103/ENSMUSG00000039217/ENSMUSG00000035914/ENSMUSG00000004043/ENSMUSG00000018899/ENSMUSG00000051457/ENSMUSG00000031897/ENSMUSG00000115338/ENSMUSG00000031207/ENSMUSG00000016496/ENSMUSG00000028076/ENSMUSG00000031805/ENSMUSG00000039981/ENSMUSG00000031101/ENSMUSG00000000290/ENSMUSG00000000732/ENSMUSG00000030707/ENSMUSG00000024397/ENSMUSG00000031497/…	4	ENSMUSG00000039323/ENSMUSG00000020053/ENSMUSG00000044206/ENSMUSG00000029816
BP	GO:0071396	cellular response to lipid	59|1102	417|14957	8.82479e-07	5.62029e-05	ENSMUSG00000055254/ENSMUSG00000029417/ENSMUSG00000069874/ENSMUSG00000026728/ENSMUSG00000022126/ENSMUSG00000045294/ENSMUSG00000020826/ENSMUSG00000020638/ENSMUSG00000032193/ENSMUSG00000105096/ENSMUSG00000021624/ENSMUSG00000039217/ENSMUSG00000028270/ENSMUSG00000016024/ENSMUSG00000104713/ENSMUSG00000041515/ENSMUSG00000026104/ENSMUSG00000020122/ENSMUSG00000030774/ENSMUSG00000041324/ENSMUSG00000035385/…	Ntrk2/Cxcl9/Irgm2/Vim/Acod1/Insig1/Nos2/Cmpk2/Ldlr/Gbp10/Cd180/Il18/Gbp2/Lbp/Gbp6/Irf8/Stat1/Egfr/Pak1/Inhba/Ccl2/Jak2/Msn/Cd274/Abca1/Adam15/Cd14/Cxcl10/Ufl1/Pdk3/Bcl10/Igf1/Ticam1/Sirpa/Myd88/Gpld1/Casp1/Mup1/Strn3/Mup11/Plscr1/Ywhah/Nfkb1/Ubr5/Akap8/Nod2/Cyp7b1/Ccl5/Pycard/Trim68/Il1rn/Gch1/Stap1/Id3/Tnfaip3/Fcgr4/Ncor2/Zfp366/Malt1	59	44	ENSMUSG00000029417/ENSMUSG00000069874/ENSMUSG00000026728/ENSMUSG00000022126/ENSMUSG00000045294/ENSMUSG00000020826/ENSMUSG00000020638/ENSMUSG00000032193/ENSMUSG00000105096/ENSMUSG00000021624/ENSMUSG00000039217/ENSMUSG00000028270/ENSMUSG00000016024/ENSMUSG00000104713/ENSMUSG00000041515/ENSMUSG00000026104/ENSMUSG00000030774/ENSMUSG00000035385/ENSMUSG00000024789/ENSMUSG00000031207/ENSMUSG00000016496/…	15	ENSMUSG00000055254/ENSMUSG00000020122/ENSMUSG00000041324/ENSMUSG00000015243/ENSMUSG00000040359/ENSMUSG00000020053/ENSMUSG00000047123/ENSMUSG00000021340/ENSMUSG00000078683/ENSMUSG00000020954/ENSMUSG00000037487/ENSMUSG00000024045/ENSMUSG00000039519/ENSMUSG00000029254/ENSMUSG00000029478
BP	GO:0050996	positive regulation of lipid catabolic process	11|1102	26|14957	9.09632e-07	5.69292e-05	ENSMUSG00000055782/ENSMUSG00000030827/ENSMUSG00000021948/ENSMUSG00000032080/ENSMUSG00000032193/ENSMUSG00000031378/ENSMUSG00000032540/ENSMUSG00000042429/ENSMUSG00000028553/ENSMUSG00000011305/ENSMUSG00000032079	Abcd2/Fgf21/Prkcd/Apoa4/Ldlr/Abcd1/Abhd5/Adora1/Angptl3/Plin5/Apoa5	11	5	ENSMUSG00000055782/ENSMUSG00000021948/ENSMUSG00000032193/ENSMUSG00000031378/ENSMUSG00000042429	6	ENSMUSG00000030827/ENSMUSG00000032080/ENSMUSG00000032540/ENSMUSG00000028553/ENSMUSG00000011305/ENSMUSG00000032079
BP	GO:0006641	triglyceride metabolic process	22|1102	94|14957	9.16231e-07	5.69292e-05	ENSMUSG00000026385/ENSMUSG00000045294/ENSMUSG00000030827/ENSMUSG00000032080/ENSMUSG00000032193/ENSMUSG00000003123/ENSMUSG00000041567/ENSMUSG00000044254/ENSMUSG00000057074/ENSMUSG00000032083/ENSMUSG00000037071/ENSMUSG00000018796/ENSMUSG00000032540/ENSMUSG00000032114/ENSMUSG00000021340/ENSMUSG00000048486/ENSMUSG00000028553/ENSMUSG00000011305/ENSMUSG00000029314/ENSMUSG00000028158/ENSMUSG00000060675/…	Dbi/Insig1/Fgf21/Apoa4/Ldlr/Lipe/Serpina12/Pcsk9/Ces1g/Apoa1/Scd1/Acsl1/Abhd5/Slc37a4/Gpld1/Fitm2/Angptl3/Plin5/Gpat3/Mttp/Pla2g16/Apoa5	22	9	ENSMUSG00000026385/ENSMUSG00000045294/ENSMUSG00000032193/ENSMUSG00000003123/ENSMUSG00000044254/ENSMUSG00000057074/ENSMUSG00000037071/ENSMUSG00000029314/ENSMUSG00000060675	13	ENSMUSG00000030827/ENSMUSG00000032080/ENSMUSG00000041567/ENSMUSG00000032083/ENSMUSG00000018796/ENSMUSG00000032540/ENSMUSG00000032114/ENSMUSG00000021340/ENSMUSG00000048486/ENSMUSG00000028553/ENSMUSG00000011305/ENSMUSG00000028158/ENSMUSG00000032079
BP	GO:0050702	interleukin-1 beta secretion	14|1102	42|14957	9.55316e-07	5.86426e-05	ENSMUSG00000036986/ENSMUSG00000022575/ENSMUSG00000032083/ENSMUSG00000031934/ENSMUSG00000027995/ENSMUSG00000015243/ENSMUSG00000070390/ENSMUSG00000025888/ENSMUSG00000105504/ENSMUSG00000055994/ENSMUSG00000037012/ENSMUSG00000030793/ENSMUSG00000039193/ENSMUSG00000019850	Pml/Gsdmd/Apoa1/Panx1/Tlr2/Abca1/Nlrp1b/Casp1/Gbp5/Nod2/Hk1/Pycard/Nlrc4/Tnfaip3	14	12	ENSMUSG00000036986/ENSMUSG00000022575/ENSMUSG00000031934/ENSMUSG00000027995/ENSMUSG00000070390/ENSMUSG00000025888/ENSMUSG00000105504/ENSMUSG00000055994/ENSMUSG00000037012/ENSMUSG00000030793/ENSMUSG00000039193/ENSMUSG00000019850	2	ENSMUSG00000032083/ENSMUSG00000015243
BP	GO:0055088	lipid homeostasis	27|1102	132|14957	9.86344e-07	5.96103e-05	ENSMUSG00000045294/ENSMUSG00000032080/ENSMUSG00000032193/ENSMUSG00000025190/ENSMUSG00000039217/ENSMUSG00000002289/ENSMUSG00000044254/ENSMUSG00000026641/ENSMUSG00000036151/ENSMUSG00000032083/ENSMUSG00000023022/ENSMUSG00000031378/ENSMUSG00000015243/ENSMUSG00000032540/ENSMUSG00000037278/ENSMUSG00000032114/ENSMUSG00000038217/ENSMUSG00000042429/ENSMUSG00000048486/ENSMUSG00000028553/ENSMUSG00000021751/…	Insig1/Apoa4/Ldlr/Got1/Il18/Angptl4/Pcsk9/Usf1/Tm6sf2/Apoa1/Lima1/Abcd1/Abca1/Abhd5/Tmem97/Slc37a4/Tlcd2/Adora1/Fitm2/Angptl3/Acox2/Mttp/Cyp7b1/Col4a3bp/Apoa5/Sec24a/Gck	27	12	ENSMUSG00000045294/ENSMUSG00000032193/ENSMUSG00000025190/ENSMUSG00000039217/ENSMUSG00000044254/ENSMUSG00000026641/ENSMUSG00000036151/ENSMUSG00000023022/ENSMUSG00000031378/ENSMUSG00000037278/ENSMUSG00000038217/ENSMUSG00000042429	15	ENSMUSG00000032080/ENSMUSG00000002289/ENSMUSG00000032083/ENSMUSG00000015243/ENSMUSG00000032540/ENSMUSG00000032114/ENSMUSG00000048486/ENSMUSG00000028553/ENSMUSG00000021751/ENSMUSG00000028158/ENSMUSG00000039519/ENSMUSG00000021669/ENSMUSG00000032079/ENSMUSG00000036391/ENSMUSG00000041798
BP	GO:0010876	lipid localization	49|1102	323|14957	9.9448e-07	5.96103e-05	ENSMUSG00000074345/ENSMUSG00000017754/ENSMUSG00000079263/ENSMUSG00000023073/ENSMUSG00000020826/ENSMUSG00000021948/ENSMUSG00000025044/ENSMUSG00000032080/ENSMUSG00000032193/ENSMUSG00000016024/ENSMUSG00000044254/ENSMUSG00000032883/ENSMUSG00000032231/ENSMUSG00000024851/ENSMUSG00000032083/ENSMUSG00000004043/ENSMUSG00000023088/ENSMUSG00000041324/ENSMUSG00000023022/ENSMUSG00000044749/ENSMUSG00000021135/…	Tnfaip8l3/Pltp/Gm6614/Slc10a2/Nos2/Prkcd/Msr1/Apoa4/Ldlr/Lbp/Pcsk9/Acsl3/Anxa2/Pitpnm1/Apoa1/Stat5a/Abcc1/Inhba/Lima1/Abca6/Slc10a1/Sqle/Acacb/Abcd1/Aqp8/Acsl1/Abca1/Scp2/Rbp4/Abhd5/Slco3a1/Alkbh7/Atp9a/Hdlbp/Eprs/Fitm2/Angptl3/Mup1/Slco2a1/Plin5/Mttp/Abcc3/Col4a3bp/Apoa5/Igfbp3/Slc27a2/Slco1b2/Acat2/C2cd2l	49	23	ENSMUSG00000074345/ENSMUSG00000023073/ENSMUSG00000020826/ENSMUSG00000021948/ENSMUSG00000025044/ENSMUSG00000032193/ENSMUSG00000016024/ENSMUSG00000044254/ENSMUSG00000032883/ENSMUSG00000032231/ENSMUSG00000024851/ENSMUSG00000004043/ENSMUSG00000023088/ENSMUSG00000023022/ENSMUSG00000022351/ENSMUSG00000042010/ENSMUSG00000031378/ENSMUSG00000030762/ENSMUSG00000025790/ENSMUSG00000002661/ENSMUSG00000032548/…	26	ENSMUSG00000017754/ENSMUSG00000079263/ENSMUSG00000032080/ENSMUSG00000032083/ENSMUSG00000041324/ENSMUSG00000044749/ENSMUSG00000021135/ENSMUSG00000018796/ENSMUSG00000015243/ENSMUSG00000028603/ENSMUSG00000024990/ENSMUSG00000032540/ENSMUSG00000027546/ENSMUSG00000034088/ENSMUSG00000026615/ENSMUSG00000048486/ENSMUSG00000028553/ENSMUSG00000078683/ENSMUSG00000011305/ENSMUSG00000028158/ENSMUSG00000021669/…
BP	GO:0006631	fatty acid metabolic process	51|1102	343|14957	1.10997e-06	6.42985e-05	ENSMUSG00000003053/ENSMUSG00000027533/ENSMUSG00000026385/ENSMUSG00000042248/ENSMUSG00000022126/ENSMUSG00000055782/ENSMUSG00000045294/ENSMUSG00000060613/ENSMUSG00000032080/ENSMUSG00000027261/ENSMUSG00000062624/ENSMUSG00000008035/ENSMUSG00000032349/ENSMUSG00000020917/ENSMUSG00000003123/ENSMUSG00000032883/ENSMUSG00000060407/ENSMUSG00000025203/ENSMUSG00000037071/ENSMUSG00000042010/ENSMUSG00000032047/…	Cyp2c29/Fabp5/Dbi/Cyp2c37/Acod1/Abcd2/Insig1/Cyp2c70/Apoa4/Hao1/Cyp2c67/Mid1ip1/Elovl5/Acly/Lipe/Acsl3/Cyp2a12/Scd2/Scd1/Acacb/Acat1/Cyp2c50/Fads3/Abcd1/Acsl1/Tnfrsf1a/Acot1/Cyp2c55/Abhd5/Abhd16a/Cyp2b10/Alkbh7/Sgpl1/Pdk3/Cyp2c68/Naaa/Bdh2/Hadhb/Angptl3/Acox2/Plin5/Acss2/Tecr/Phyh/Fads6/Apoa5/Cyp2j6/Slc27a2/Acsm3/Acat2/Acot12	51	29	ENSMUSG00000003053/ENSMUSG00000026385/ENSMUSG00000042248/ENSMUSG00000022126/ENSMUSG00000055782/ENSMUSG00000045294/ENSMUSG00000008035/ENSMUSG00000032349/ENSMUSG00000020917/ENSMUSG00000003123/ENSMUSG00000032883/ENSMUSG00000025203/ENSMUSG00000037071/ENSMUSG00000042010/ENSMUSG00000054827/ENSMUSG00000024664/ENSMUSG00000031378/ENSMUSG00000030341/ENSMUSG00000025002/ENSMUSG00000007036/ENSMUSG00000030483/…	22	ENSMUSG00000027533/ENSMUSG00000060613/ENSMUSG00000032080/ENSMUSG00000027261/ENSMUSG00000062624/ENSMUSG00000060407/ENSMUSG00000032047/ENSMUSG00000018796/ENSMUSG00000072949/ENSMUSG00000032540/ENSMUSG00000074882/ENSMUSG00000059447/ENSMUSG00000028553/ENSMUSG00000021751/ENSMUSG00000011305/ENSMUSG00000026664/ENSMUSG00000044788/ENSMUSG00000032079/ENSMUSG00000052914/ENSMUSG00000027359/ENSMUSG00000030935/…
BP	GO:0032612	interleukin-1 production	22|1102	95|14957	1.11055e-06	6.42985e-05	ENSMUSG00000078817/ENSMUSG00000036986/ENSMUSG00000022575/ENSMUSG00000032083/ENSMUSG00000031934/ENSMUSG00000024789/ENSMUSG00000027995/ENSMUSG00000015243/ENSMUSG00000031451/ENSMUSG00000004951/ENSMUSG00000020053/ENSMUSG00000070390/ENSMUSG00000037902/ENSMUSG00000025888/ENSMUSG00000105504/ENSMUSG00000055994/ENSMUSG00000037012/ENSMUSG00000030793/ENSMUSG00000001123/ENSMUSG00000039193/ENSMUSG00000019850/…	Nlrp12/Pml/Gsdmd/Apoa1/Panx1/Jak2/Tlr2/Abca1/Gas6/Hspb1/Igf1/Nlrp1b/Sirpa/Casp1/Gbp5/Nod2/Hk1/Pycard/Lgals9/Nlrc4/Tnfaip3/Malt1	22	18	ENSMUSG00000036986/ENSMUSG00000022575/ENSMUSG00000031934/ENSMUSG00000024789/ENSMUSG00000027995/ENSMUSG00000031451/ENSMUSG00000004951/ENSMUSG00000070390/ENSMUSG00000037902/ENSMUSG00000025888/ENSMUSG00000105504/ENSMUSG00000055994/ENSMUSG00000037012/ENSMUSG00000030793/ENSMUSG00000001123/ENSMUSG00000039193/ENSMUSG00000019850/ENSMUSG00000032688	4	ENSMUSG00000078817/ENSMUSG00000032083/ENSMUSG00000015243/ENSMUSG00000020053
BP	GO:0032649	regulation of interferon-gamma production	22|1102	95|14957	1.11055e-06	6.42985e-05	ENSMUSG00000026072/ENSMUSG00000049103/ENSMUSG00000039217/ENSMUSG00000041515/ENSMUSG00000035914/ENSMUSG00000053175/ENSMUSG00000016496/ENSMUSG00000051439/ENSMUSG00000031451/ENSMUSG00000035692/ENSMUSG00000028076/ENSMUSG00000031101/ENSMUSG00000055447/ENSMUSG00000027347/ENSMUSG00000037902/ENSMUSG00000031639/ENSMUSG00000055994/ENSMUSG00000044701/ENSMUSG00000030793/ENSMUSG00000001123/ENSMUSG00000044583/…	Il1r1/Ccr2/Il18/Irf8/Cd276/Bcl3/Cd274/Cd14/Gas6/Isg15/Cd1d1/Sash3/Cd47/Rasgrp1/Sirpa/Tlr3/Nod2/Il27/Pycard/Lgals9/Tlr7/Ulbp1	22	20	ENSMUSG00000049103/ENSMUSG00000039217/ENSMUSG00000041515/ENSMUSG00000035914/ENSMUSG00000053175/ENSMUSG00000016496/ENSMUSG00000051439/ENSMUSG00000031451/ENSMUSG00000035692/ENSMUSG00000028076/ENSMUSG00000031101/ENSMUSG00000055447/ENSMUSG00000027347/ENSMUSG00000037902/ENSMUSG00000031639/ENSMUSG00000055994/ENSMUSG00000044701/ENSMUSG00000030793/ENSMUSG00000001123/ENSMUSG00000079685	2	ENSMUSG00000026072/ENSMUSG00000044583
BP	GO:0090025	regulation of monocyte chemotaxis	10|1102	22|14957	1.2898e-06	7.38376e-05	ENSMUSG00000049103/ENSMUSG00000037362/ENSMUSG00000035385/ENSMUSG00000052270/ENSMUSG00000034855/ENSMUSG00000053318/ENSMUSG00000023913/ENSMUSG00000024397/ENSMUSG00000035042/ENSMUSG00000025804	Ccr2/Nov/Ccl2/Fpr2/Cxcl10/Slamf8/Pla2g7/Aif1/Ccl5/Ccr1	10	9	ENSMUSG00000049103/ENSMUSG00000037362/ENSMUSG00000035385/ENSMUSG00000052270/ENSMUSG00000034855/ENSMUSG00000053318/ENSMUSG00000024397/ENSMUSG00000035042/ENSMUSG00000025804	1	ENSMUSG00000023913
BP	GO:0045834	positive regulation of lipid metabolic process	28|1102	142|14957	1.35614e-06	7.67727e-05	ENSMUSG00000026385/ENSMUSG00000074345/ENSMUSG00000036585/ENSMUSG00000055782/ENSMUSG00000030827/ENSMUSG00000021948/ENSMUSG00000032080/ENSMUSG00000032193/ENSMUSG00000008035/ENSMUSG00000032349/ENSMUSG00000002289/ENSMUSG00000032883/ENSMUSG00000032083/ENSMUSG00000052270/ENSMUSG00000037071/ENSMUSG00000031378/ENSMUSG00000028874/ENSMUSG00000028603/ENSMUSG00000032540/ENSMUSG00000020053/ENSMUSG00000042429/…	Dbi/Tnfaip8l3/Fgf1/Abcd2/Fgf21/Prkcd/Apoa4/Ldlr/Mid1ip1/Elovl5/Angptl4/Acsl3/Apoa1/Fpr2/Scd1/Abcd1/Fgr/Scp2/Abhd5/Igf1/Adora1/Gpld1/Angptl3/Mup1/Plin5/Nod2/Apoa5/F2	28	14	ENSMUSG00000026385/ENSMUSG00000074345/ENSMUSG00000055782/ENSMUSG00000021948/ENSMUSG00000032193/ENSMUSG00000008035/ENSMUSG00000032349/ENSMUSG00000032883/ENSMUSG00000052270/ENSMUSG00000037071/ENSMUSG00000031378/ENSMUSG00000028874/ENSMUSG00000042429/ENSMUSG00000055994	14	ENSMUSG00000036585/ENSMUSG00000030827/ENSMUSG00000032080/ENSMUSG00000002289/ENSMUSG00000032083/ENSMUSG00000028603/ENSMUSG00000032540/ENSMUSG00000020053/ENSMUSG00000021340/ENSMUSG00000028553/ENSMUSG00000078683/ENSMUSG00000011305/ENSMUSG00000032079/ENSMUSG00000027249
BP	GO:0002253	activation of immune response	52|1102	355|14957	1.38233e-06	7.73953e-05	ENSMUSG00000015451/ENSMUSG00000029656/ENSMUSG00000046688/ENSMUSG00000025498/ENSMUSG00000069874/ENSMUSG00000022126/ENSMUSG00000022181/ENSMUSG00000026938/ENSMUSG00000022149/ENSMUSG00000036908/ENSMUSG00000016024/ENSMUSG00000026542/ENSMUSG00000035914/ENSMUSG00000025314/ENSMUSG00000018899/ENSMUSG00000051457/ENSMUSG00000052270/ENSMUSG00000027995/ENSMUSG00000017830/ENSMUSG00000051439/ENSMUSG00000035031/…	C4a/C8b/Tifa/Irf7/Irgm2/Acod1/C6/Fcna/C9/Unc93b1/Lbp/Apcs/Cd276/Ptprj/Irf1/Spn/Fpr2/Tlr2/Dhx58/Cd14/C8a/Ddx58/Btnl9/Flot1/Cd47/Zc3hav1/Bcl10/Ticam1/Icosl/Myd88/Tlr3/Gpld1/Braf/Lgals3/Myo1g/Plcg2/Fcer1g/Plscr1/Cfb/Ddx60/Nod2/Vsig4/Tlr1/Pycard/Lgals9/Tlr7/Nlrc4/Tbk1/Stap1/Tnfaip3/Usp9x/Malt1	52	38	ENSMUSG00000046688/ENSMUSG00000025498/ENSMUSG00000069874/ENSMUSG00000022126/ENSMUSG00000036908/ENSMUSG00000016024/ENSMUSG00000026542/ENSMUSG00000035914/ENSMUSG00000025314/ENSMUSG00000018899/ENSMUSG00000051457/ENSMUSG00000052270/ENSMUSG00000027995/ENSMUSG00000017830/ENSMUSG00000051439/ENSMUSG00000040296/ENSMUSG00000059714/ENSMUSG00000055447/ENSMUSG00000029826/ENSMUSG00000028191/ENSMUSG00000000732/…	14	ENSMUSG00000015451/ENSMUSG00000029656/ENSMUSG00000022181/ENSMUSG00000026938/ENSMUSG00000022149/ENSMUSG00000035031/ENSMUSG00000040283/ENSMUSG00000047123/ENSMUSG00000021340/ENSMUSG00000002413/ENSMUSG00000044206/ENSMUSG00000044583/ENSMUSG00000029254/ENSMUSG00000031010
BP	GO:0045089	positive regulation of innate immune response	37|1102	218|14957	1.44734e-06	8.01542e-05	ENSMUSG00000046688/ENSMUSG00000025498/ENSMUSG00000030895/ENSMUSG00000074151/ENSMUSG00000069874/ENSMUSG00000022126/ENSMUSG00000027514/ENSMUSG00000036908/ENSMUSG00000016024/ENSMUSG00000004043/ENSMUSG00000046879/ENSMUSG00000018899/ENSMUSG00000052270/ENSMUSG00000027995/ENSMUSG00000017830/ENSMUSG00000051439/ENSMUSG00000040296/ENSMUSG00000054717/ENSMUSG00000059714/ENSMUSG00000029826/ENSMUSG00000027347/…	Tifa/Irf7/Hpx/Nlrc5/Irgm2/Acod1/Zbp1/Unc93b1/Lbp/Stat5a/Irgm1/Irf1/Fpr2/Tlr2/Dhx58/Cd14/Ddx58/Hmgb2/Flot1/Zc3hav1/Rasgrp1/Bcl10/Ticam1/Myd88/Tlr3/Plscr1/Gbp5/Ddx60/Nod2/Tlr1/Pycard/Lgals9/Tlr7/Ulbp1/Nlrc4/Tbk1/Tnfaip3	37	35	ENSMUSG00000046688/ENSMUSG00000025498/ENSMUSG00000030895/ENSMUSG00000074151/ENSMUSG00000069874/ENSMUSG00000022126/ENSMUSG00000027514/ENSMUSG00000036908/ENSMUSG00000016024/ENSMUSG00000004043/ENSMUSG00000046879/ENSMUSG00000018899/ENSMUSG00000052270/ENSMUSG00000027995/ENSMUSG00000017830/ENSMUSG00000051439/ENSMUSG00000040296/ENSMUSG00000054717/ENSMUSG00000059714/ENSMUSG00000029826/ENSMUSG00000027347/…	2	ENSMUSG00000047123/ENSMUSG00000044583
BP	GO:0002250	adaptive immune response	54|1102	375|14957	1.48518e-06	8.13654e-05	ENSMUSG00000029656/ENSMUSG00000025498/ENSMUSG00000030895/ENSMUSG00000067235/ENSMUSG00000026072/ENSMUSG00000001750/ENSMUSG00000042333/ENSMUSG00000030560/ENSMUSG00000022149/ENSMUSG00000021948/ENSMUSG00000049103/ENSMUSG00000037405/ENSMUSG00000039217/ENSMUSG00000023249/ENSMUSG00000028064/ENSMUSG00000036908/ENSMUSG00000039384/ENSMUSG00000026542/ENSMUSG00000031594/ENSMUSG00000015947/ENSMUSG00000041481/…	C8b/Irf7/Hpx/H2-Q10/Il1r1/Tcirg1/Tnfrsf14/Ctsc/C9/Prkcd/Ccr2/Icam1/Il18/Parp3/Sema4a/Unc93b1/Dusp10/Apcs/Fgl1/Fcgr1/Serpina3g/Relb/Irf1/Spn/Fas/Tap1/Bcl3/Shld2/Jak2/Pnp/Serpinb9/Cd274/C8a/Rnf19b/Cd1d1/Jak3/Sash3/Bcl10/Icosl/Myd88/Tnfsf13b/Myo1g/Fcer1g/Nod2/Stat3/Il27/Pycard/Erap1/Ulbp1/H2-Eb1/Tnfaip3/H2-DMa/Malt1/Dbnl	54	49	ENSMUSG00000025498/ENSMUSG00000030895/ENSMUSG00000067235/ENSMUSG00000001750/ENSMUSG00000042333/ENSMUSG00000030560/ENSMUSG00000021948/ENSMUSG00000049103/ENSMUSG00000037405/ENSMUSG00000039217/ENSMUSG00000023249/ENSMUSG00000028064/ENSMUSG00000036908/ENSMUSG00000039384/ENSMUSG00000026542/ENSMUSG00000031594/ENSMUSG00000015947/ENSMUSG00000041481/ENSMUSG00000002983/ENSMUSG00000018899/ENSMUSG00000051457/…	5	ENSMUSG00000029656/ENSMUSG00000026072/ENSMUSG00000022149/ENSMUSG00000041471/ENSMUSG00000035031
BP	GO:0090407	organophosphate biosynthetic process	62|1102	454|14957	1.57901e-06	8.50023e-05	ENSMUSG00000027533/ENSMUSG00000013629/ENSMUSG00000017390/ENSMUSG00000039616/ENSMUSG00000020826/ENSMUSG00000020638/ENSMUSG00000023982/ENSMUSG00000020917/ENSMUSG00000052776/ENSMUSG00000037847/ENSMUSG00000032883/ENSMUSG00000032478/ENSMUSG00000032083/ENSMUSG00000029561/ENSMUSG00000052270/ENSMUSG00000028671/ENSMUSG00000036813/ENSMUSG00000115338/ENSMUSG00000000628/ENSMUSG00000042010/ENSMUSG00000032047/…	Fabp5/Cad/Aldoc/Mocos/Nos2/Cmpk2/Guca1a/Acly/Oas1a/Nmrk1/Acsl3/Nme6/Apoa1/Oasl2/Fpr2/Gale/Entpd8/Pnp/Hk2/Acacb/Acat1/Acsl1/Slc2a6/Scp2/mt-Co2/Pmvk/Pkm/Isyna1/Mvk/Abhd5/Ipmk/Pdk3/Igf1/Sgms2/Hk3/Far1/Tkt/Gpd1/Plek/Hmgcs2/Fitm2/Pklr/Plcg2/Plscr1/Idi1/Acss2/Ak7/Hmgcs1/Gpat3/Adpgk/Stat3/Pla2g16/Pank4/Hk1/Kars/Sh3yl1/Pfkp/Ctps2/Cds2/Idh1/Dhdds/Gck	62	43	ENSMUSG00000017390/ENSMUSG00000039616/ENSMUSG00000020826/ENSMUSG00000020638/ENSMUSG00000023982/ENSMUSG00000020917/ENSMUSG00000052776/ENSMUSG00000032883/ENSMUSG00000029561/ENSMUSG00000052270/ENSMUSG00000028671/ENSMUSG00000115338/ENSMUSG00000000628/ENSMUSG00000042010/ENSMUSG00000036067/ENSMUSG00000064354/ENSMUSG00000027952/ENSMUSG00000032294/ENSMUSG00000019139/ENSMUSG00000041939/ENSMUSG00000060733/…	19	ENSMUSG00000027533/ENSMUSG00000013629/ENSMUSG00000037847/ENSMUSG00000032478/ENSMUSG00000032083/ENSMUSG00000036813/ENSMUSG00000032047/ENSMUSG00000018796/ENSMUSG00000028603/ENSMUSG00000032540/ENSMUSG00000020053/ENSMUSG00000023019/ENSMUSG00000027875/ENSMUSG00000048486/ENSMUSG00000041237/ENSMUSG00000025236/ENSMUSG00000029056/ENSMUSG00000012117/ENSMUSG00000041798
BP	GO:0008610	lipid biosynthetic process	66|1102	494|14957	1.58493e-06	8.50023e-05	ENSMUSG00000027533/ENSMUSG00000026385/ENSMUSG00000036585/ENSMUSG00000055782/ENSMUSG00000045294/ENSMUSG00000032018/ENSMUSG00000021948/ENSMUSG00000032080/ENSMUSG00000032193/ENSMUSG00000008035/ENSMUSG00000032349/ENSMUSG00000020917/ENSMUSG00000041567/ENSMUSG00000032883/ENSMUSG00000032083/ENSMUSG00000025203/ENSMUSG00000024799/ENSMUSG00000032038/ENSMUSG00000052270/ENSMUSG00000037071/ENSMUSG00000010175/…	Fabp5/Dbi/Fgf1/Abcd2/Insig1/Sc5d/Prkcd/Apoa4/Ldlr/Mid1ip1/Elovl5/Acly/Serpina12/Acsl3/Apoa1/Scd2/Tm7sf2/St3gal4/Fpr2/Scd1/Prox1/Sqle/Acacb/Fads3/Abcd1/Acsl1/B3galt1/Scp2/Pmvk/Isyna1/Mvk/Abhd5/9130409I23Rik/Igf1/Sgms2/Far1/Erg28/Hmgcs2/Cyp2r1/Gpld1/Fitm2/Plcg2/Mup1/Lbr/Plin5/Plscr1/Idi1/Acss2/Nsdhl/Tecr/Nfkb1/Hmgcs1/Gpat3/Cyp7b1/Pla2g16/Hsd3b2/Fads6/Sh3yl1/Apoa5/Msmo1/Cds2/Slc27a2/Acsm3/Idh1/Dhdds…	66	41	ENSMUSG00000026385/ENSMUSG00000055782/ENSMUSG00000045294/ENSMUSG00000032018/ENSMUSG00000021948/ENSMUSG00000032193/ENSMUSG00000008035/ENSMUSG00000032349/ENSMUSG00000020917/ENSMUSG00000032883/ENSMUSG00000025203/ENSMUSG00000024799/ENSMUSG00000052270/ENSMUSG00000037071/ENSMUSG00000022351/ENSMUSG00000042010/ENSMUSG00000024664/ENSMUSG00000031378/ENSMUSG00000027952/ENSMUSG00000019139/ENSMUSG00000041939/…	25	ENSMUSG00000027533/ENSMUSG00000036585/ENSMUSG00000032080/ENSMUSG00000041567/ENSMUSG00000032083/ENSMUSG00000032038/ENSMUSG00000010175/ENSMUSG00000018796/ENSMUSG00000034780/ENSMUSG00000028603/ENSMUSG00000032540/ENSMUSG00000020053/ENSMUSG00000027875/ENSMUSG00000021340/ENSMUSG00000048486/ENSMUSG00000078683/ENSMUSG00000011305/ENSMUSG00000039519/ENSMUSG00000063730/ENSMUSG00000044788/ENSMUSG00000032079/…
BP	GO:0032648	regulation of interferon-beta production	15|1102	50|14957	1.79852e-06	9.49167e-05	ENSMUSG00000025498/ENSMUSG00000002983/ENSMUSG00000018899/ENSMUSG00000027995/ENSMUSG00000040296/ENSMUSG00000054717/ENSMUSG00000059714/ENSMUSG00000029826/ENSMUSG00000047123/ENSMUSG00000037902/ENSMUSG00000031639/ENSMUSG00000034292/ENSMUSG00000030793/ENSMUSG00000044583/ENSMUSG00000020115	Irf7/Relb/Irf1/Tlr2/Ddx58/Hmgb2/Flot1/Zc3hav1/Ticam1/Sirpa/Tlr3/Traf3ip1/Pycard/Tlr7/Tbk1	15	12	ENSMUSG00000025498/ENSMUSG00000002983/ENSMUSG00000018899/ENSMUSG00000027995/ENSMUSG00000040296/ENSMUSG00000054717/ENSMUSG00000059714/ENSMUSG00000029826/ENSMUSG00000037902/ENSMUSG00000031639/ENSMUSG00000030793/ENSMUSG00000020115	3	ENSMUSG00000047123/ENSMUSG00000034292/ENSMUSG00000044583
BP	GO:0006695	cholesterol biosynthetic process	14|1102	44|14957	1.80705e-06	9.49167e-05	ENSMUSG00000036585/ENSMUSG00000045294/ENSMUSG00000032018/ENSMUSG00000032080/ENSMUSG00000032083/ENSMUSG00000024799/ENSMUSG00000028603/ENSMUSG00000027952/ENSMUSG00000041939/ENSMUSG00000027875/ENSMUSG00000004880/ENSMUSG00000031349/ENSMUSG00000093930/ENSMUSG00000032079	Fgf1/Insig1/Sc5d/Apoa4/Apoa1/Tm7sf2/Scp2/Pmvk/Mvk/Hmgcs2/Lbr/Nsdhl/Hmgcs1/Apoa5	14	8	ENSMUSG00000045294/ENSMUSG00000032018/ENSMUSG00000024799/ENSMUSG00000027952/ENSMUSG00000041939/ENSMUSG00000004880/ENSMUSG00000031349/ENSMUSG00000093930	6	ENSMUSG00000036585/ENSMUSG00000032080/ENSMUSG00000032083/ENSMUSG00000028603/ENSMUSG00000027875/ENSMUSG00000032079
BP	GO:0050729	positive regulation of inflammatory response	25|1102	121|14957	2.03086e-06	0.000104929	ENSMUSG00000030560/ENSMUSG00000049103/ENSMUSG00000032193/ENSMUSG00000037820/ENSMUSG00000016024/ENSMUSG00000015947/ENSMUSG00000020122/ENSMUSG00000004043/ENSMUSG00000023088/ENSMUSG00000024789/ENSMUSG00000027995/ENSMUSG00000015599/ENSMUSG00000030341/ENSMUSG00000056071/ENSMUSG00000055447/ENSMUSG00000030281/ENSMUSG00000047123/ENSMUSG00000032508/ENSMUSG00000031639/ENSMUSG00000058715/ENSMUSG00000105504/…	Ctsc/Ccr2/Ldlr/Tgm2/Lbp/Fcgr1/Egfr/Stat5a/Abcc1/Jak2/Tlr2/Ttbk1/Tnfrsf1a/S100a9/Cd47/Il17rc/Ticam1/Myd88/Tlr3/Fcer1g/Gbp5/Nod2/Ccl5/Kars/Stap1	25	21	ENSMUSG00000030560/ENSMUSG00000049103/ENSMUSG00000032193/ENSMUSG00000037820/ENSMUSG00000016024/ENSMUSG00000015947/ENSMUSG00000004043/ENSMUSG00000023088/ENSMUSG00000024789/ENSMUSG00000027995/ENSMUSG00000030341/ENSMUSG00000056071/ENSMUSG00000055447/ENSMUSG00000030281/ENSMUSG00000032508/ENSMUSG00000031639/ENSMUSG00000058715/ENSMUSG00000105504/ENSMUSG00000055994/ENSMUSG00000035042/ENSMUSG00000031948	4	ENSMUSG00000020122/ENSMUSG00000015599/ENSMUSG00000047123/ENSMUSG00000029254
BP	GO:0042129	regulation of T cell proliferation	29|1102	153|14957	2.0538e-06	0.000104929	ENSMUSG00000031628/ENSMUSG00000042333/ENSMUSG00000049103/ENSMUSG00000039217/ENSMUSG00000035914/ENSMUSG00000004043/ENSMUSG00000039323/ENSMUSG00000018899/ENSMUSG00000051457/ENSMUSG00000115338/ENSMUSG00000016496/ENSMUSG00000028076/ENSMUSG00000031805/ENSMUSG00000039981/ENSMUSG00000031101/ENSMUSG00000020053/ENSMUSG00000000732/ENSMUSG00000030707/ENSMUSG00000024397/ENSMUSG00000031497/ENSMUSG00000050335/…	Casp3/Tnfrsf14/Ccr2/Il18/Cd276/Stat5a/Igfbp2/Irf1/Spn/Pnp/Cd274/Cd1d1/Jak3/Zc3h12d/Sash3/Igf1/Icosl/Coro1a/Aif1/Tnfsf13b/Lgals3/Rac2/Ccl5/Vsig4/Slfn1/Il27/Pycard/Lgals9/Gpnmb	29	25	ENSMUSG00000031628/ENSMUSG00000042333/ENSMUSG00000049103/ENSMUSG00000039217/ENSMUSG00000035914/ENSMUSG00000004043/ENSMUSG00000018899/ENSMUSG00000051457/ENSMUSG00000115338/ENSMUSG00000016496/ENSMUSG00000028076/ENSMUSG00000031805/ENSMUSG00000039981/ENSMUSG00000031101/ENSMUSG00000000732/ENSMUSG00000030707/ENSMUSG00000024397/ENSMUSG00000031497/ENSMUSG00000050335/ENSMUSG00000033220/ENSMUSG00000035042/…	4	ENSMUSG00000039323/ENSMUSG00000020053/ENSMUSG00000044206/ENSMUSG00000029816
BP	GO:0002460	adaptive immune response based on somatic recombination of immune receptors built from immunoglobulin superfamily domains	42|1102	266|14957	2.06119e-06	0.000104929	ENSMUSG00000029656/ENSMUSG00000025498/ENSMUSG00000030895/ENSMUSG00000067235/ENSMUSG00000026072/ENSMUSG00000001750/ENSMUSG00000030560/ENSMUSG00000022149/ENSMUSG00000021948/ENSMUSG00000049103/ENSMUSG00000037405/ENSMUSG00000039217/ENSMUSG00000023249/ENSMUSG00000028064/ENSMUSG00000026542/ENSMUSG00000015947/ENSMUSG00000002983/ENSMUSG00000018899/ENSMUSG00000051457/ENSMUSG00000024778/ENSMUSG00000053175/…	C8b/Irf7/Hpx/H2-Q10/Il1r1/Tcirg1/Ctsc/C9/Prkcd/Ccr2/Icam1/Il18/Parp3/Sema4a/Apcs/Fcgr1/Relb/Irf1/Spn/Fas/Bcl3/Shld2/Pnp/Serpinb9/Cd274/C8a/Cd1d1/Jak3/Sash3/Bcl10/Icosl/Myd88/Tnfsf13b/Myo1g/Fcer1g/Nod2/Stat3/Il27/Ulbp1/Tnfaip3/H2-DMa/Malt1	42	37	ENSMUSG00000025498/ENSMUSG00000030895/ENSMUSG00000067235/ENSMUSG00000001750/ENSMUSG00000030560/ENSMUSG00000021948/ENSMUSG00000049103/ENSMUSG00000037405/ENSMUSG00000039217/ENSMUSG00000023249/ENSMUSG00000028064/ENSMUSG00000026542/ENSMUSG00000015947/ENSMUSG00000002983/ENSMUSG00000018899/ENSMUSG00000051457/ENSMUSG00000024778/ENSMUSG00000053175/ENSMUSG00000115338/ENSMUSG00000045827/ENSMUSG00000016496/…	5	ENSMUSG00000029656/ENSMUSG00000026072/ENSMUSG00000022149/ENSMUSG00000041471/ENSMUSG00000035031
BP	GO:0046651	lymphocyte proliferation	41|1102	257|14957	2.08004e-06	0.000104929	ENSMUSG00000031628/ENSMUSG00000042333/ENSMUSG00000021948/ENSMUSG00000049103/ENSMUSG00000021624/ENSMUSG00000039217/ENSMUSG00000035914/ENSMUSG00000004043/ENSMUSG00000039323/ENSMUSG00000018899/ENSMUSG00000051457/ENSMUSG00000031897/ENSMUSG00000115338/ENSMUSG00000031207/ENSMUSG00000016496/ENSMUSG00000028076/ENSMUSG00000031805/ENSMUSG00000040329/ENSMUSG00000039981/ENSMUSG00000031101/ENSMUSG00000000290/…	Casp3/Tnfrsf14/Prkcd/Ccr2/Cd180/Il18/Cd276/Stat5a/Igfbp2/Irf1/Spn/Psmb10/Pnp/Msn/Cd274/Cd1d1/Jak3/Il7/Zc3h12d/Sash3/Itgb2/Igf1/Ticam1/Icosl/Coro1a/Myd88/Aif1/Tnfsf13b/Lgals3/Rac2/Ccl5/Vsig4/Slfn1/Il27/Pycard/Lgals9/Bst1/Tbk1/Dock2/Malt1/Gpnmb	41	36	ENSMUSG00000031628/ENSMUSG00000042333/ENSMUSG00000021948/ENSMUSG00000049103/ENSMUSG00000021624/ENSMUSG00000039217/ENSMUSG00000035914/ENSMUSG00000004043/ENSMUSG00000018899/ENSMUSG00000051457/ENSMUSG00000031897/ENSMUSG00000115338/ENSMUSG00000031207/ENSMUSG00000016496/ENSMUSG00000028076/ENSMUSG00000031805/ENSMUSG00000040329/ENSMUSG00000039981/ENSMUSG00000031101/ENSMUSG00000000290/ENSMUSG00000000732/…	5	ENSMUSG00000039323/ENSMUSG00000020053/ENSMUSG00000047123/ENSMUSG00000044206/ENSMUSG00000029816
BP	GO:0002449	lymphocyte mediated immunity	40|1102	249|14957	2.31423e-06	0.000115598	ENSMUSG00000029656/ENSMUSG00000025498/ENSMUSG00000030895/ENSMUSG00000067235/ENSMUSG00000026072/ENSMUSG00000001750/ENSMUSG00000030560/ENSMUSG00000022149/ENSMUSG00000021948/ENSMUSG00000049103/ENSMUSG00000037405/ENSMUSG00000039217/ENSMUSG00000023249/ENSMUSG00000026542/ENSMUSG00000015947/ENSMUSG00000004043/ENSMUSG00000051457/ENSMUSG00000024778/ENSMUSG00000037321/ENSMUSG00000053175/ENSMUSG00000041471/…	C8b/Irf7/Hpx/H2-Q10/Il1r1/Tcirg1/Ctsc/C9/Prkcd/Ccr2/Icam1/Il18/Parp3/Apcs/Fcgr1/Stat5a/Spn/Fas/Tap1/Bcl3/Shld2/Pnp/Serpinb9/Clec2d/C8a/Rnf19b/Cd1d1/Sash3/Rasgrp1/Bcl10/Icosl/Coro1a/Myd88/Myo1g/Fcer1g/Nod2/Lgals9/Ulbp1/H2-DMa/Malt1	40	35	ENSMUSG00000025498/ENSMUSG00000030895/ENSMUSG00000067235/ENSMUSG00000001750/ENSMUSG00000030560/ENSMUSG00000021948/ENSMUSG00000049103/ENSMUSG00000037405/ENSMUSG00000039217/ENSMUSG00000023249/ENSMUSG00000026542/ENSMUSG00000015947/ENSMUSG00000004043/ENSMUSG00000051457/ENSMUSG00000024778/ENSMUSG00000037321/ENSMUSG00000053175/ENSMUSG00000115338/ENSMUSG00000045827/ENSMUSG00000030157/ENSMUSG00000028793/…	5	ENSMUSG00000029656/ENSMUSG00000026072/ENSMUSG00000022149/ENSMUSG00000041471/ENSMUSG00000035031
BP	GO:0032635	interleukin-6 production	28|1102	146|14957	2.4116e-06	0.000119292	ENSMUSG00000078817/ENSMUSG00000020826/ENSMUSG00000039217/ENSMUSG00000036908/ENSMUSG00000016024/ENSMUSG00000027995/ENSMUSG00000031451/ENSMUSG00000030341/ENSMUSG00000040296/ENSMUSG00000006014/ENSMUSG00000025083/ENSMUSG00000055447/ENSMUSG00000030281/ENSMUSG00000047123/ENSMUSG00000037902/ENSMUSG00000032508/ENSMUSG00000024397/ENSMUSG00000031639/ENSMUSG00000058715/ENSMUSG00000055994/ENSMUSG00000004040/…	Nlrp12/Nos2/Il18/Unc93b1/Lbp/Tlr2/Gas6/Tnfrsf1a/Ddx58/Prg4/Afap1l2/Cd47/Il17rc/Ticam1/Sirpa/Myd88/Aif1/Tlr3/Fcer1g/Nod2/Stat3/Tlr1/Il1rap/Pycard/Lgals9/Tlr7/Il1rn/Tnfaip3	28	24	ENSMUSG00000020826/ENSMUSG00000039217/ENSMUSG00000036908/ENSMUSG00000016024/ENSMUSG00000027995/ENSMUSG00000031451/ENSMUSG00000030341/ENSMUSG00000040296/ENSMUSG00000006014/ENSMUSG00000025083/ENSMUSG00000055447/ENSMUSG00000030281/ENSMUSG00000037902/ENSMUSG00000032508/ENSMUSG00000024397/ENSMUSG00000031639/ENSMUSG00000058715/ENSMUSG00000055994/ENSMUSG00000004040/ENSMUSG00000044827/ENSMUSG00000030793/…	4	ENSMUSG00000078817/ENSMUSG00000047123/ENSMUSG00000022514/ENSMUSG00000044583
BP	GO:0032943	mononuclear cell proliferation	41|1102	259|14957	2.54443e-06	0.000124653	ENSMUSG00000031628/ENSMUSG00000042333/ENSMUSG00000021948/ENSMUSG00000049103/ENSMUSG00000021624/ENSMUSG00000039217/ENSMUSG00000035914/ENSMUSG00000004043/ENSMUSG00000039323/ENSMUSG00000018899/ENSMUSG00000051457/ENSMUSG00000031897/ENSMUSG00000115338/ENSMUSG00000031207/ENSMUSG00000016496/ENSMUSG00000028076/ENSMUSG00000031805/ENSMUSG00000040329/ENSMUSG00000039981/ENSMUSG00000031101/ENSMUSG00000000290/…	Casp3/Tnfrsf14/Prkcd/Ccr2/Cd180/Il18/Cd276/Stat5a/Igfbp2/Irf1/Spn/Psmb10/Pnp/Msn/Cd274/Cd1d1/Jak3/Il7/Zc3h12d/Sash3/Itgb2/Igf1/Ticam1/Icosl/Coro1a/Myd88/Aif1/Tnfsf13b/Lgals3/Rac2/Ccl5/Vsig4/Slfn1/Il27/Pycard/Lgals9/Bst1/Tbk1/Dock2/Malt1/Gpnmb	41	36	ENSMUSG00000031628/ENSMUSG00000042333/ENSMUSG00000021948/ENSMUSG00000049103/ENSMUSG00000021624/ENSMUSG00000039217/ENSMUSG00000035914/ENSMUSG00000004043/ENSMUSG00000018899/ENSMUSG00000051457/ENSMUSG00000031897/ENSMUSG00000115338/ENSMUSG00000031207/ENSMUSG00000016496/ENSMUSG00000028076/ENSMUSG00000031805/ENSMUSG00000040329/ENSMUSG00000039981/ENSMUSG00000031101/ENSMUSG00000000290/ENSMUSG00000000732/…	5	ENSMUSG00000039323/ENSMUSG00000020053/ENSMUSG00000047123/ENSMUSG00000044206/ENSMUSG00000029816
BP	GO:0032611	interleukin-1 beta production	19|1102	78|14957	2.64937e-06	0.000128558	ENSMUSG00000036986/ENSMUSG00000022575/ENSMUSG00000032083/ENSMUSG00000031934/ENSMUSG00000024789/ENSMUSG00000027995/ENSMUSG00000015243/ENSMUSG00000004951/ENSMUSG00000020053/ENSMUSG00000070390/ENSMUSG00000037902/ENSMUSG00000025888/ENSMUSG00000105504/ENSMUSG00000055994/ENSMUSG00000037012/ENSMUSG00000030793/ENSMUSG00000039193/ENSMUSG00000019850/ENSMUSG00000032688	Pml/Gsdmd/Apoa1/Panx1/Jak2/Tlr2/Abca1/Hspb1/Igf1/Nlrp1b/Sirpa/Casp1/Gbp5/Nod2/Hk1/Pycard/Nlrc4/Tnfaip3/Malt1	19	16	ENSMUSG00000036986/ENSMUSG00000022575/ENSMUSG00000031934/ENSMUSG00000024789/ENSMUSG00000027995/ENSMUSG00000004951/ENSMUSG00000070390/ENSMUSG00000037902/ENSMUSG00000025888/ENSMUSG00000105504/ENSMUSG00000055994/ENSMUSG00000037012/ENSMUSG00000030793/ENSMUSG00000039193/ENSMUSG00000019850/ENSMUSG00000032688	3	ENSMUSG00000032083/ENSMUSG00000015243/ENSMUSG00000020053
BP	GO:0050764	regulation of phagocytosis	22|1102	100|14957	2.77651e-06	0.000133456	ENSMUSG00000016024/ENSMUSG00000015947/ENSMUSG00000032083/ENSMUSG00000025314/ENSMUSG00000035385/ENSMUSG00000052270/ENSMUSG00000027995/ENSMUSG00000028874/ENSMUSG00000031451/ENSMUSG00000004665/ENSMUSG00000055447/ENSMUSG00000037902/ENSMUSG00000058715/ENSMUSG00000003283/ENSMUSG00000055994/ENSMUSG00000020372/ENSMUSG00000030793/ENSMUSG00000020143/ENSMUSG00000029254/ENSMUSG00000068227/ENSMUSG00000039145/…	Lbp/Fcgr1/Apoa1/Ptprj/Ccl2/Fpr2/Tlr2/Fgr/Gas6/Cnn2/Cd47/Sirpa/Fcer1g/Hck/Nod2/Rack1/Pycard/Dock2/Stap1/Il2rb/Camk1d/Ahsg	22	18	ENSMUSG00000016024/ENSMUSG00000015947/ENSMUSG00000025314/ENSMUSG00000035385/ENSMUSG00000052270/ENSMUSG00000027995/ENSMUSG00000028874/ENSMUSG00000031451/ENSMUSG00000004665/ENSMUSG00000055447/ENSMUSG00000037902/ENSMUSG00000058715/ENSMUSG00000003283/ENSMUSG00000055994/ENSMUSG00000030793/ENSMUSG00000020143/ENSMUSG00000068227/ENSMUSG00000039145	4	ENSMUSG00000032083/ENSMUSG00000020372/ENSMUSG00000029254/ENSMUSG00000022868
BP	GO:0032608	interferon-beta production	15|1102	52|14957	3.11339e-06	0.00014825	ENSMUSG00000025498/ENSMUSG00000002983/ENSMUSG00000018899/ENSMUSG00000027995/ENSMUSG00000040296/ENSMUSG00000054717/ENSMUSG00000059714/ENSMUSG00000029826/ENSMUSG00000047123/ENSMUSG00000037902/ENSMUSG00000031639/ENSMUSG00000034292/ENSMUSG00000030793/ENSMUSG00000044583/ENSMUSG00000020115	Irf7/Relb/Irf1/Tlr2/Ddx58/Hmgb2/Flot1/Zc3hav1/Ticam1/Sirpa/Tlr3/Traf3ip1/Pycard/Tlr7/Tbk1	15	12	ENSMUSG00000025498/ENSMUSG00000002983/ENSMUSG00000018899/ENSMUSG00000027995/ENSMUSG00000040296/ENSMUSG00000054717/ENSMUSG00000059714/ENSMUSG00000029826/ENSMUSG00000037902/ENSMUSG00000031639/ENSMUSG00000030793/ENSMUSG00000020115	3	ENSMUSG00000047123/ENSMUSG00000034292/ENSMUSG00000044583
BP	GO:0044406	adhesion of symbiont to host	8|1102	15|14957	3.41224e-06	0.000160047	ENSMUSG00000037405/ENSMUSG00000028270/ENSMUSG00000104713/ENSMUSG00000028268/ENSMUSG00000040253/ENSMUSG00000031451/ENSMUSG00000029298/ENSMUSG00000023944	Icam1/Gbp2/Gbp6/Gbp3/Gbp7/Gas6/Gbp9/Hsp90ab1	8	8	ENSMUSG00000037405/ENSMUSG00000028270/ENSMUSG00000104713/ENSMUSG00000028268/ENSMUSG00000040253/ENSMUSG00000031451/ENSMUSG00000029298/ENSMUSG00000023944	0
BP	GO:0016042	lipid catabolic process	41|1102	262|14957	3.42396e-06	0.000160047	ENSMUSG00000026385/ENSMUSG00000022425/ENSMUSG00000055782/ENSMUSG00000030827/ENSMUSG00000021948/ENSMUSG00000032080/ENSMUSG00000032193/ENSMUSG00000027261/ENSMUSG00000003123/ENSMUSG00000037686/ENSMUSG00000057074/ENSMUSG00000032083/ENSMUSG00000042010/ENSMUSG00000032047/ENSMUSG00000031378/ENSMUSG00000060560/ENSMUSG00000032540/ENSMUSG00000007036/ENSMUSG00000023913/ENSMUSG00000020097/ENSMUSG00000042429/…	Dbi/Enpp2/Abcd2/Fgf21/Prkcd/Apoa4/Ldlr/Hao1/Lipe/Aspg/Ces1g/Apoa1/Acacb/Acat1/Abcd1/Ces4a/Abhd5/Abhd16a/Pla2g7/Sgpl1/Adora1/Naaa/Bdh2/Hadhb/Gpld1/Angptl3/Acox2/Plcg2/Gla/Plin5/Ywhah/Phyh/Pla2g16/Ces1a/Apoa5/Hcar2/Inpp5f/Pdxdc1/Slc27a2/Idh1/Acat2	41	22	ENSMUSG00000026385/ENSMUSG00000055782/ENSMUSG00000021948/ENSMUSG00000032193/ENSMUSG00000003123/ENSMUSG00000037686/ENSMUSG00000057074/ENSMUSG00000042010/ENSMUSG00000031378/ENSMUSG00000007036/ENSMUSG00000020097/ENSMUSG00000042429/ENSMUSG00000029413/ENSMUSG00000028167/ENSMUSG00000034330/ENSMUSG00000031266/ENSMUSG00000018965/ENSMUSG00000060675/ENSMUSG00000071047/ENSMUSG00000045502/ENSMUSG00000025950/…	19	ENSMUSG00000022425/ENSMUSG00000030827/ENSMUSG00000032080/ENSMUSG00000027261/ENSMUSG00000032083/ENSMUSG00000032047/ENSMUSG00000060560/ENSMUSG00000032540/ENSMUSG00000023913/ENSMUSG00000059447/ENSMUSG00000021340/ENSMUSG00000028553/ENSMUSG00000021751/ENSMUSG00000011305/ENSMUSG00000026664/ENSMUSG00000032079/ENSMUSG00000042105/ENSMUSG00000022680/ENSMUSG00000027359
BP	GO:1901615	organic hydroxy compound metabolic process	57|1102	415|14957	3.47503e-06	0.000160957	ENSMUSG00000074115/ENSMUSG00000017754/ENSMUSG00000036585/ENSMUSG00000066441/ENSMUSG00000045294/ENSMUSG00000032018/ENSMUSG00000015806/ENSMUSG00000032080/ENSMUSG00000068452/ENSMUSG00000032193/ENSMUSG00000027261/ENSMUSG00000025190/ENSMUSG00000003123/ENSMUSG00000041567/ENSMUSG00000057963/ENSMUSG00000044254/ENSMUSG00000031594/ENSMUSG00000024140/ENSMUSG00000019838/ENSMUSG00000032083/ENSMUSG00000056666/…	Saa1/Pltp/Fgf1/Rdh11/Insig1/Sc5d/Qdpr/Apoa4/Duox2/Ldlr/Hao1/Got1/Lipe/Serpina12/Itpk1/Pcsk9/Fgl1/Epas1/Slc16a10/Apoa1/Retsat/Gcnt4/Lima1/Myof/Tm7sf2/Prox1/Sdr16c5/Sqle/Abca1/Scp2/Pmvk/Rbp4/Impa2/Isyna1/Mvk/Ipmk/Slc37a4/Hdlbp/Naaa/Gpd1/Erg28/Plek/Hmgcs2/Cyp2r1/Angptl3/Plcg2/Lbr/Nsdhl/Nfkb1/Hmgcs1/Mttp/Cyp7b1/Apoa5/Msmo1/Gch1/Slc27a2/Dhdds	57	33	ENSMUSG00000074115/ENSMUSG00000066441/ENSMUSG00000045294/ENSMUSG00000032018/ENSMUSG00000015806/ENSMUSG00000068452/ENSMUSG00000032193/ENSMUSG00000025190/ENSMUSG00000003123/ENSMUSG00000057963/ENSMUSG00000044254/ENSMUSG00000031594/ENSMUSG00000019838/ENSMUSG00000023022/ENSMUSG00000048612/ENSMUSG00000024799/ENSMUSG00000022351/ENSMUSG00000027952/ENSMUSG00000024525/ENSMUSG00000019139/ENSMUSG00000041939/…	24	ENSMUSG00000017754/ENSMUSG00000036585/ENSMUSG00000032080/ENSMUSG00000027261/ENSMUSG00000041567/ENSMUSG00000024140/ENSMUSG00000032083/ENSMUSG00000056666/ENSMUSG00000091387/ENSMUSG00000010175/ENSMUSG00000028236/ENSMUSG00000015243/ENSMUSG00000028603/ENSMUSG00000024990/ENSMUSG00000032114/ENSMUSG00000034088/ENSMUSG00000023019/ENSMUSG00000027875/ENSMUSG00000028553/ENSMUSG00000028158/ENSMUSG00000039519/…
BP	GO:0050704	regulation of interleukin-1 secretion	13|1102	41|14957	4.41408e-06	0.00020261	ENSMUSG00000078817/ENSMUSG00000036986/ENSMUSG00000022575/ENSMUSG00000032083/ENSMUSG00000031934/ENSMUSG00000027995/ENSMUSG00000031451/ENSMUSG00000070390/ENSMUSG00000025888/ENSMUSG00000055994/ENSMUSG00000037012/ENSMUSG00000030793/ENSMUSG00000019850	Nlrp12/Pml/Gsdmd/Apoa1/Panx1/Tlr2/Gas6/Nlrp1b/Casp1/Nod2/Hk1/Pycard/Tnfaip3	13	11	ENSMUSG00000036986/ENSMUSG00000022575/ENSMUSG00000031934/ENSMUSG00000027995/ENSMUSG00000031451/ENSMUSG00000070390/ENSMUSG00000025888/ENSMUSG00000055994/ENSMUSG00000037012/ENSMUSG00000030793/ENSMUSG00000019850	2	ENSMUSG00000078817/ENSMUSG00000032083
BP	GO:0070661	leukocyte proliferation	42|1102	275|14957	4.91106e-06	0.000222874	ENSMUSG00000031628/ENSMUSG00000001750/ENSMUSG00000042333/ENSMUSG00000021948/ENSMUSG00000049103/ENSMUSG00000021624/ENSMUSG00000039217/ENSMUSG00000035914/ENSMUSG00000004043/ENSMUSG00000039323/ENSMUSG00000018899/ENSMUSG00000051457/ENSMUSG00000031897/ENSMUSG00000115338/ENSMUSG00000031207/ENSMUSG00000016496/ENSMUSG00000028076/ENSMUSG00000031805/ENSMUSG00000040329/ENSMUSG00000039981/ENSMUSG00000031101/…	Casp3/Tcirg1/Tnfrsf14/Prkcd/Ccr2/Cd180/Il18/Cd276/Stat5a/Igfbp2/Irf1/Spn/Psmb10/Pnp/Msn/Cd274/Cd1d1/Jak3/Il7/Zc3h12d/Sash3/Itgb2/Igf1/Ticam1/Icosl/Coro1a/Myd88/Aif1/Tnfsf13b/Lgals3/Rac2/Ccl5/Vsig4/Slfn1/Il27/Pycard/Lgals9/Bst1/Tbk1/Dock2/Malt1/Gpnmb	42	37	ENSMUSG00000031628/ENSMUSG00000001750/ENSMUSG00000042333/ENSMUSG00000021948/ENSMUSG00000049103/ENSMUSG00000021624/ENSMUSG00000039217/ENSMUSG00000035914/ENSMUSG00000004043/ENSMUSG00000018899/ENSMUSG00000051457/ENSMUSG00000031897/ENSMUSG00000115338/ENSMUSG00000031207/ENSMUSG00000016496/ENSMUSG00000028076/ENSMUSG00000031805/ENSMUSG00000040329/ENSMUSG00000039981/ENSMUSG00000031101/ENSMUSG00000000290/…	5	ENSMUSG00000039323/ENSMUSG00000020053/ENSMUSG00000047123/ENSMUSG00000044206/ENSMUSG00000029816
BP	GO:0060333	interferon-gamma-mediated signaling pathway	9|1102	20|14957	4.94303e-06	0.000222874	ENSMUSG00000030895/ENSMUSG00000074151/ENSMUSG00000069874/ENSMUSG00000034422/ENSMUSG00000038037/ENSMUSG00000026104/ENSMUSG00000046879/ENSMUSG00000018899/ENSMUSG00000024789	Hpx/Nlrc5/Irgm2/Parp14/Socs1/Stat1/Irgm1/Irf1/Jak2	9	9	ENSMUSG00000030895/ENSMUSG00000074151/ENSMUSG00000069874/ENSMUSG00000034422/ENSMUSG00000038037/ENSMUSG00000026104/ENSMUSG00000046879/ENSMUSG00000018899/ENSMUSG00000024789	0
BP	GO:0050728	negative regulation of inflammatory response	26|1102	135|14957	5.04587e-06	0.000225515	ENSMUSG00000078817/ENSMUSG00000022126/ENSMUSG00000055782/ENSMUSG00000032193/ENSMUSG00000039384/ENSMUSG00000035914/ENSMUSG00000032083/ENSMUSG00000037362/ENSMUSG00000051457/ENSMUSG00000052270/ENSMUSG00000031378/ENSMUSG00000030341/ENSMUSG00000041939/ENSMUSG00000053318/ENSMUSG00000020053/ENSMUSG00000042429/ENSMUSG00000037902/ENSMUSG00000028163/ENSMUSG00000043683/ENSMUSG00000055994/ENSMUSG00000030793/…	Nlrp12/Acod1/Abcd2/Ldlr/Dusp10/Cd276/Apoa1/Nov/Spn/Fpr2/Abcd1/Tnfrsf1a/Mvk/Slamf8/Igf1/Adora1/Sirpa/Nfkb1/Fem1a/Nod2/Pycard/Lgals9/Adora2a/Tnfaip3/Psma1/F2	26	21	ENSMUSG00000022126/ENSMUSG00000055782/ENSMUSG00000032193/ENSMUSG00000039384/ENSMUSG00000035914/ENSMUSG00000037362/ENSMUSG00000051457/ENSMUSG00000052270/ENSMUSG00000031378/ENSMUSG00000030341/ENSMUSG00000041939/ENSMUSG00000053318/ENSMUSG00000042429/ENSMUSG00000037902/ENSMUSG00000028163/ENSMUSG00000055994/ENSMUSG00000030793/ENSMUSG00000001123/ENSMUSG00000020178/ENSMUSG00000019850/ENSMUSG00000030751	5	ENSMUSG00000078817/ENSMUSG00000032083/ENSMUSG00000020053/ENSMUSG00000043683/ENSMUSG00000027249
BP	GO:1900015	regulation of cytokine production involved in inflammatory response	12|1102	36|14957	5.73246e-06	0.000253973	ENSMUSG00000055782/ENSMUSG00000020826/ENSMUSG00000031378/ENSMUSG00000030281/ENSMUSG00000047123/ENSMUSG00000037902/ENSMUSG00000032508/ENSMUSG00000105504/ENSMUSG00000055994/ENSMUSG00000030793/ENSMUSG00000031948/ENSMUSG00000027249	Abcd2/Nos2/Abcd1/Il17rc/Ticam1/Sirpa/Myd88/Gbp5/Nod2/Pycard/Kars/F2	12	10	ENSMUSG00000055782/ENSMUSG00000020826/ENSMUSG00000031378/ENSMUSG00000030281/ENSMUSG00000037902/ENSMUSG00000032508/ENSMUSG00000105504/ENSMUSG00000055994/ENSMUSG00000030793/ENSMUSG00000031948	2	ENSMUSG00000047123/ENSMUSG00000027249
BP	GO:0097530	granulocyte migration	24|1102	120|14957	5.86669e-06	0.000257679	ENSMUSG00000029417/ENSMUSG00000026072/ENSMUSG00000016024/ENSMUSG00000025314/ENSMUSG00000035385/ENSMUSG00000056071/ENSMUSG00000034855/ENSMUSG00000053318/ENSMUSG00000032114/ENSMUSG00000000290/ENSMUSG00000030281/ENSMUSG00000037902/ENSMUSG00000032508/ENSMUSG00000050335/ENSMUSG00000058715/ENSMUSG00000033220/ENSMUSG00000028859/ENSMUSG00000055994/ENSMUSG00000035042/ENSMUSG00000031948/ENSMUSG00000029082/…	Cxcl9/Il1r1/Lbp/Ptprj/Ccl2/S100a9/Cxcl10/Slamf8/Slc37a4/Itgb2/Il17rc/Sirpa/Myd88/Lgals3/Fcer1g/Rac2/Csf3r/Nod2/Ccl5/Kars/Bst1/Il1rn/Cxadr/Camk1d	24	22	ENSMUSG00000029417/ENSMUSG00000016024/ENSMUSG00000025314/ENSMUSG00000035385/ENSMUSG00000056071/ENSMUSG00000034855/ENSMUSG00000053318/ENSMUSG00000000290/ENSMUSG00000030281/ENSMUSG00000037902/ENSMUSG00000032508/ENSMUSG00000050335/ENSMUSG00000058715/ENSMUSG00000033220/ENSMUSG00000028859/ENSMUSG00000055994/ENSMUSG00000035042/ENSMUSG00000031948/ENSMUSG00000029082/ENSMUSG00000026981/ENSMUSG00000022865/…	2	ENSMUSG00000026072/ENSMUSG00000032114
BP	GO:0090026	positive regulation of monocyte chemotaxis	8|1102	16|14957	6.38315e-06	0.000277967	ENSMUSG00000049103/ENSMUSG00000035385/ENSMUSG00000052270/ENSMUSG00000034855/ENSMUSG00000023913/ENSMUSG00000024397/ENSMUSG00000035042/ENSMUSG00000025804	Ccr2/Ccl2/Fpr2/Cxcl10/Pla2g7/Aif1/Ccl5/Ccr1	8	7	ENSMUSG00000049103/ENSMUSG00000035385/ENSMUSG00000052270/ENSMUSG00000034855/ENSMUSG00000024397/ENSMUSG00000035042/ENSMUSG00000025804	1	ENSMUSG00000023913
BP	GO:0046165	alcohol biosynthetic process	25|1102	129|14957	6.7964e-06	0.000293455	ENSMUSG00000036585/ENSMUSG00000045294/ENSMUSG00000032018/ENSMUSG00000015806/ENSMUSG00000032080/ENSMUSG00000025190/ENSMUSG00000032083/ENSMUSG00000024799/ENSMUSG00000028603/ENSMUSG00000027952/ENSMUSG00000019139/ENSMUSG00000041939/ENSMUSG00000060733/ENSMUSG00000021252/ENSMUSG00000020120/ENSMUSG00000027875/ENSMUSG00000030670/ENSMUSG00000034330/ENSMUSG00000004880/ENSMUSG00000031349/ENSMUSG00000028163/…	Fgf1/Insig1/Sc5d/Qdpr/Apoa4/Got1/Apoa1/Tm7sf2/Scp2/Pmvk/Isyna1/Mvk/Ipmk/Erg28/Plek/Hmgcs2/Cyp2r1/Plcg2/Lbr/Nsdhl/Nfkb1/Hmgcs1/Apoa5/Gch1/Dhdds	25	18	ENSMUSG00000045294/ENSMUSG00000032018/ENSMUSG00000015806/ENSMUSG00000025190/ENSMUSG00000024799/ENSMUSG00000027952/ENSMUSG00000019139/ENSMUSG00000041939/ENSMUSG00000060733/ENSMUSG00000021252/ENSMUSG00000020120/ENSMUSG00000030670/ENSMUSG00000034330/ENSMUSG00000004880/ENSMUSG00000031349/ENSMUSG00000028163/ENSMUSG00000093930/ENSMUSG00000037580	7	ENSMUSG00000036585/ENSMUSG00000032080/ENSMUSG00000032083/ENSMUSG00000028603/ENSMUSG00000027875/ENSMUSG00000032079/ENSMUSG00000012117
BP	GO:0032652	regulation of interleukin-1 production	19|1102	83|14957	7.08787e-06	0.000303468	ENSMUSG00000078817/ENSMUSG00000036986/ENSMUSG00000022575/ENSMUSG00000032083/ENSMUSG00000031934/ENSMUSG00000024789/ENSMUSG00000027995/ENSMUSG00000031451/ENSMUSG00000004951/ENSMUSG00000020053/ENSMUSG00000070390/ENSMUSG00000037902/ENSMUSG00000025888/ENSMUSG00000055994/ENSMUSG00000037012/ENSMUSG00000030793/ENSMUSG00000001123/ENSMUSG00000019850/ENSMUSG00000032688	Nlrp12/Pml/Gsdmd/Apoa1/Panx1/Jak2/Tlr2/Gas6/Hspb1/Igf1/Nlrp1b/Sirpa/Casp1/Nod2/Hk1/Pycard/Lgals9/Tnfaip3/Malt1	19	16	ENSMUSG00000036986/ENSMUSG00000022575/ENSMUSG00000031934/ENSMUSG00000024789/ENSMUSG00000027995/ENSMUSG00000031451/ENSMUSG00000004951/ENSMUSG00000070390/ENSMUSG00000037902/ENSMUSG00000025888/ENSMUSG00000055994/ENSMUSG00000037012/ENSMUSG00000030793/ENSMUSG00000001123/ENSMUSG00000019850/ENSMUSG00000032688	3	ENSMUSG00000078817/ENSMUSG00000032083/ENSMUSG00000020053
BP	GO:0006805	xenobiotic metabolic process	21|1102	98|14957	7.2139e-06	0.00030629	ENSMUSG00000003053/ENSMUSG00000042248/ENSMUSG00000060613/ENSMUSG00000035836/ENSMUSG00000058135/ENSMUSG00000062624/ENSMUSG00000058216/ENSMUSG00000068762/ENSMUSG00000025934/ENSMUSG00000004043/ENSMUSG00000060407/ENSMUSG00000054827/ENSMUSG00000018796/ENSMUSG00000057933/ENSMUSG00000025002/ENSMUSG00000030483/ENSMUSG00000074882/ENSMUSG00000030670/ENSMUSG00000038155/ENSMUSG00000027890/ENSMUSG00000052914	Cyp2c29/Cyp2c37/Cyp2c70/Ugt2b1/Gstm1/Cyp2c67/Gstp3/Gstm6/Gsta3/Stat5a/Cyp2a12/Cyp2c50/Acsl1/Gsta2/Cyp2c55/Cyp2b10/Cyp2c68/Cyp2r1/Gstp2/Gstm4/Cyp2j6	21	13	ENSMUSG00000003053/ENSMUSG00000042248/ENSMUSG00000058135/ENSMUSG00000068762/ENSMUSG00000025934/ENSMUSG00000004043/ENSMUSG00000054827/ENSMUSG00000057933/ENSMUSG00000025002/ENSMUSG00000030483/ENSMUSG00000030670/ENSMUSG00000038155/ENSMUSG00000027890	8	ENSMUSG00000060613/ENSMUSG00000035836/ENSMUSG00000062624/ENSMUSG00000058216/ENSMUSG00000060407/ENSMUSG00000018796/ENSMUSG00000074882/ENSMUSG00000052914
BP	GO:0050670	regulation of lymphocyte proliferation	33|1102	198|14957	7.8771e-06	0.000331684	ENSMUSG00000031628/ENSMUSG00000042333/ENSMUSG00000049103/ENSMUSG00000039217/ENSMUSG00000035914/ENSMUSG00000004043/ENSMUSG00000039323/ENSMUSG00000018899/ENSMUSG00000051457/ENSMUSG00000115338/ENSMUSG00000016496/ENSMUSG00000028076/ENSMUSG00000031805/ENSMUSG00000040329/ENSMUSG00000039981/ENSMUSG00000031101/ENSMUSG00000020053/ENSMUSG00000047123/ENSMUSG00000000732/ENSMUSG00000030707/ENSMUSG00000032508/…	Casp3/Tnfrsf14/Ccr2/Il18/Cd276/Stat5a/Igfbp2/Irf1/Spn/Pnp/Cd274/Cd1d1/Jak3/Il7/Zc3h12d/Sash3/Igf1/Ticam1/Icosl/Coro1a/Myd88/Aif1/Tnfsf13b/Lgals3/Rac2/Ccl5/Vsig4/Slfn1/Il27/Pycard/Lgals9/Bst1/Gpnmb	33	28	ENSMUSG00000031628/ENSMUSG00000042333/ENSMUSG00000049103/ENSMUSG00000039217/ENSMUSG00000035914/ENSMUSG00000004043/ENSMUSG00000018899/ENSMUSG00000051457/ENSMUSG00000115338/ENSMUSG00000016496/ENSMUSG00000028076/ENSMUSG00000031805/ENSMUSG00000040329/ENSMUSG00000039981/ENSMUSG00000031101/ENSMUSG00000000732/ENSMUSG00000030707/ENSMUSG00000032508/ENSMUSG00000024397/ENSMUSG00000031497/ENSMUSG00000050335/…	5	ENSMUSG00000039323/ENSMUSG00000020053/ENSMUSG00000047123/ENSMUSG00000044206/ENSMUSG00000029816
BP	GO:0032675	regulation of interleukin-6 production	26|1102	139|14957	8.7749e-06	0.00036646	ENSMUSG00000078817/ENSMUSG00000036908/ENSMUSG00000016024/ENSMUSG00000027995/ENSMUSG00000031451/ENSMUSG00000030341/ENSMUSG00000040296/ENSMUSG00000006014/ENSMUSG00000025083/ENSMUSG00000055447/ENSMUSG00000030281/ENSMUSG00000047123/ENSMUSG00000037902/ENSMUSG00000032508/ENSMUSG00000024397/ENSMUSG00000031639/ENSMUSG00000058715/ENSMUSG00000055994/ENSMUSG00000004040/ENSMUSG00000044827/ENSMUSG00000022514/…	Nlrp12/Unc93b1/Lbp/Tlr2/Gas6/Tnfrsf1a/Ddx58/Prg4/Afap1l2/Cd47/Il17rc/Ticam1/Sirpa/Myd88/Aif1/Tlr3/Fcer1g/Nod2/Stat3/Tlr1/Il1rap/Pycard/Lgals9/Tlr7/Il1rn/Tnfaip3	26	22	ENSMUSG00000036908/ENSMUSG00000016024/ENSMUSG00000027995/ENSMUSG00000031451/ENSMUSG00000030341/ENSMUSG00000040296/ENSMUSG00000006014/ENSMUSG00000025083/ENSMUSG00000055447/ENSMUSG00000030281/ENSMUSG00000037902/ENSMUSG00000032508/ENSMUSG00000024397/ENSMUSG00000031639/ENSMUSG00000058715/ENSMUSG00000055994/ENSMUSG00000004040/ENSMUSG00000044827/ENSMUSG00000030793/ENSMUSG00000001123/ENSMUSG00000026981/…	4	ENSMUSG00000078817/ENSMUSG00000047123/ENSMUSG00000022514/ENSMUSG00000044583
BP	GO:0006639	acylglycerol metabolic process	23|1102	115|14957	9.12249e-06	0.000377879	ENSMUSG00000026385/ENSMUSG00000045294/ENSMUSG00000030827/ENSMUSG00000032080/ENSMUSG00000032193/ENSMUSG00000003123/ENSMUSG00000041567/ENSMUSG00000044254/ENSMUSG00000057074/ENSMUSG00000032083/ENSMUSG00000037071/ENSMUSG00000018796/ENSMUSG00000032540/ENSMUSG00000007036/ENSMUSG00000032114/ENSMUSG00000021340/ENSMUSG00000048486/ENSMUSG00000028553/ENSMUSG00000011305/ENSMUSG00000029314/ENSMUSG00000028158/…	Dbi/Insig1/Fgf21/Apoa4/Ldlr/Lipe/Serpina12/Pcsk9/Ces1g/Apoa1/Scd1/Acsl1/Abhd5/Abhd16a/Slc37a4/Gpld1/Fitm2/Angptl3/Plin5/Gpat3/Mttp/Pla2g16/Apoa5	23	10	ENSMUSG00000026385/ENSMUSG00000045294/ENSMUSG00000032193/ENSMUSG00000003123/ENSMUSG00000044254/ENSMUSG00000057074/ENSMUSG00000037071/ENSMUSG00000007036/ENSMUSG00000029314/ENSMUSG00000060675	13	ENSMUSG00000030827/ENSMUSG00000032080/ENSMUSG00000041567/ENSMUSG00000032083/ENSMUSG00000018796/ENSMUSG00000032540/ENSMUSG00000032114/ENSMUSG00000021340/ENSMUSG00000048486/ENSMUSG00000028553/ENSMUSG00000011305/ENSMUSG00000028158/ENSMUSG00000032079
BP	GO:0044242	cellular lipid catabolic process	31|1102	182|14957	9.37621e-06	0.000385256	ENSMUSG00000026385/ENSMUSG00000022425/ENSMUSG00000055782/ENSMUSG00000030827/ENSMUSG00000021948/ENSMUSG00000032080/ENSMUSG00000032193/ENSMUSG00000027261/ENSMUSG00000003123/ENSMUSG00000032083/ENSMUSG00000042010/ENSMUSG00000032047/ENSMUSG00000031378/ENSMUSG00000032540/ENSMUSG00000007036/ENSMUSG00000020097/ENSMUSG00000028167/ENSMUSG00000059447/ENSMUSG00000021340/ENSMUSG00000028553/ENSMUSG00000021751/…	Dbi/Enpp2/Abcd2/Fgf21/Prkcd/Apoa4/Ldlr/Hao1/Lipe/Apoa1/Acacb/Acat1/Abcd1/Abhd5/Abhd16a/Sgpl1/Bdh2/Hadhb/Gpld1/Angptl3/Acox2/Plcg2/Gla/Plin5/Phyh/Apoa5/Inpp5f/Pdxdc1/Slc27a2/Idh1/Acat2	31	14	ENSMUSG00000026385/ENSMUSG00000055782/ENSMUSG00000021948/ENSMUSG00000032193/ENSMUSG00000003123/ENSMUSG00000042010/ENSMUSG00000031378/ENSMUSG00000007036/ENSMUSG00000020097/ENSMUSG00000028167/ENSMUSG00000034330/ENSMUSG00000031266/ENSMUSG00000025950/ENSMUSG00000023832	17	ENSMUSG00000022425/ENSMUSG00000030827/ENSMUSG00000032080/ENSMUSG00000027261/ENSMUSG00000032083/ENSMUSG00000032047/ENSMUSG00000032540/ENSMUSG00000059447/ENSMUSG00000021340/ENSMUSG00000028553/ENSMUSG00000021751/ENSMUSG00000011305/ENSMUSG00000026664/ENSMUSG00000032079/ENSMUSG00000042105/ENSMUSG00000022680/ENSMUSG00000027359
BP	GO:0032944	regulation of mononuclear cell proliferation	33|1102	200|14957	9.79922e-06	0.000399416	ENSMUSG00000031628/ENSMUSG00000042333/ENSMUSG00000049103/ENSMUSG00000039217/ENSMUSG00000035914/ENSMUSG00000004043/ENSMUSG00000039323/ENSMUSG00000018899/ENSMUSG00000051457/ENSMUSG00000115338/ENSMUSG00000016496/ENSMUSG00000028076/ENSMUSG00000031805/ENSMUSG00000040329/ENSMUSG00000039981/ENSMUSG00000031101/ENSMUSG00000020053/ENSMUSG00000047123/ENSMUSG00000000732/ENSMUSG00000030707/ENSMUSG00000032508/…	Casp3/Tnfrsf14/Ccr2/Il18/Cd276/Stat5a/Igfbp2/Irf1/Spn/Pnp/Cd274/Cd1d1/Jak3/Il7/Zc3h12d/Sash3/Igf1/Ticam1/Icosl/Coro1a/Myd88/Aif1/Tnfsf13b/Lgals3/Rac2/Ccl5/Vsig4/Slfn1/Il27/Pycard/Lgals9/Bst1/Gpnmb	33	28	ENSMUSG00000031628/ENSMUSG00000042333/ENSMUSG00000049103/ENSMUSG00000039217/ENSMUSG00000035914/ENSMUSG00000004043/ENSMUSG00000018899/ENSMUSG00000051457/ENSMUSG00000115338/ENSMUSG00000016496/ENSMUSG00000028076/ENSMUSG00000031805/ENSMUSG00000040329/ENSMUSG00000039981/ENSMUSG00000031101/ENSMUSG00000000732/ENSMUSG00000030707/ENSMUSG00000032508/ENSMUSG00000024397/ENSMUSG00000031497/ENSMUSG00000050335/…	5	ENSMUSG00000039323/ENSMUSG00000020053/ENSMUSG00000047123/ENSMUSG00000044206/ENSMUSG00000029816
BP	GO:0002688	regulation of leukocyte chemotaxis	21|1102	100|14957	1.00596e-05	0.000403669	ENSMUSG00000049103/ENSMUSG00000016024/ENSMUSG00000037362/ENSMUSG00000025314/ENSMUSG00000035385/ENSMUSG00000052270/ENSMUSG00000031451/ENSMUSG00000034855/ENSMUSG00000050350/ENSMUSG00000053318/ENSMUSG00000023913/ENSMUSG00000024397/ENSMUSG00000033220/ENSMUSG00000055994/ENSMUSG00000035042/ENSMUSG00000031948/ENSMUSG00000025804/ENSMUSG00000029082/ENSMUSG00000029254/ENSMUSG00000039145/ENSMUSG00000032754	Ccr2/Lbp/Nov/Ptprj/Ccl2/Fpr2/Gas6/Cxcl10/Gpr18/Slamf8/Pla2g7/Aif1/Rac2/Nod2/Ccl5/Kars/Ccr1/Bst1/Stap1/Camk1d/Slc8b1	21	19	ENSMUSG00000049103/ENSMUSG00000016024/ENSMUSG00000037362/ENSMUSG00000025314/ENSMUSG00000035385/ENSMUSG00000052270/ENSMUSG00000031451/ENSMUSG00000034855/ENSMUSG00000050350/ENSMUSG00000053318/ENSMUSG00000024397/ENSMUSG00000033220/ENSMUSG00000055994/ENSMUSG00000035042/ENSMUSG00000031948/ENSMUSG00000025804/ENSMUSG00000029082/ENSMUSG00000039145/ENSMUSG00000032754	2	ENSMUSG00000023913/ENSMUSG00000029254
BP	GO:0032728	positive regulation of interferon-beta production	11|1102	32|14957	1.0062e-05	0.000403669	ENSMUSG00000025498/ENSMUSG00000018899/ENSMUSG00000027995/ENSMUSG00000040296/ENSMUSG00000054717/ENSMUSG00000059714/ENSMUSG00000029826/ENSMUSG00000047123/ENSMUSG00000031639/ENSMUSG00000044583/ENSMUSG00000020115	Irf7/Irf1/Tlr2/Ddx58/Hmgb2/Flot1/Zc3hav1/Ticam1/Tlr3/Tlr7/Tbk1	11	9	ENSMUSG00000025498/ENSMUSG00000018899/ENSMUSG00000027995/ENSMUSG00000040296/ENSMUSG00000054717/ENSMUSG00000059714/ENSMUSG00000029826/ENSMUSG00000031639/ENSMUSG00000020115	2	ENSMUSG00000047123/ENSMUSG00000044583
BP	GO:0006644	phospholipid metabolic process	45|1102	312|14957	1.05391e-05	0.000419504	ENSMUSG00000027533/ENSMUSG00000026385/ENSMUSG00000022425/ENSMUSG00000074345/ENSMUSG00000021948/ENSMUSG00000032080/ENSMUSG00000032193/ENSMUSG00000038037/ENSMUSG00000023232/ENSMUSG00000028517/ENSMUSG00000037686/ENSMUSG00000044254/ENSMUSG00000032883/ENSMUSG00000032083/ENSMUSG00000052270/ENSMUSG00000028874/ENSMUSG00000038174/ENSMUSG00000027952/ENSMUSG00000024525/ENSMUSG00000019139/ENSMUSG00000041939/…	Fabp5/Dbi/Enpp2/Tnfaip8l3/Prkcd/Apoa4/Ldlr/Socs1/Serinc2/Plpp3/Aspg/Pcsk9/Acsl3/Apoa1/Fpr2/Fgr/Fam126b/Pmvk/Impa2/Isyna1/Mvk/Abhd5/Abhd16a/Pla2g7/Sgms2/Plpp5/Far1/Plek/Hmgcs2/Gpld1/Fitm2/Angptl3/Plcg2/Plscr1/Idi1/Hmgcs1/Gpat3/Nod2/Pla2g16/Sh3yl1/Apoa5/Inpp5f/Cds2/Idh1/Dhdds	45	29	ENSMUSG00000026385/ENSMUSG00000074345/ENSMUSG00000021948/ENSMUSG00000032193/ENSMUSG00000038037/ENSMUSG00000023232/ENSMUSG00000037686/ENSMUSG00000044254/ENSMUSG00000032883/ENSMUSG00000052270/ENSMUSG00000028874/ENSMUSG00000027952/ENSMUSG00000024525/ENSMUSG00000019139/ENSMUSG00000041939/ENSMUSG00000007036/ENSMUSG00000050931/ENSMUSG00000030759/ENSMUSG00000020120/ENSMUSG00000034330/ENSMUSG00000032369/…	16	ENSMUSG00000027533/ENSMUSG00000022425/ENSMUSG00000032080/ENSMUSG00000028517/ENSMUSG00000032083/ENSMUSG00000038174/ENSMUSG00000032540/ENSMUSG00000023913/ENSMUSG00000031570/ENSMUSG00000027875/ENSMUSG00000021340/ENSMUSG00000048486/ENSMUSG00000028553/ENSMUSG00000032079/ENSMUSG00000042105/ENSMUSG00000012117
BP	GO:0002532	production of molecular mediator involved in inflammatory response	16|1102	64|14957	1.13015e-05	0.000446365	ENSMUSG00000055782/ENSMUSG00000020826/ENSMUSG00000039384/ENSMUSG00000016024/ENSMUSG00000031378/ENSMUSG00000053318/ENSMUSG00000030281/ENSMUSG00000047123/ENSMUSG00000037902/ENSMUSG00000032508/ENSMUSG00000058715/ENSMUSG00000105504/ENSMUSG00000055994/ENSMUSG00000030793/ENSMUSG00000031948/ENSMUSG00000027249	Abcd2/Nos2/Dusp10/Lbp/Abcd1/Slamf8/Il17rc/Ticam1/Sirpa/Myd88/Fcer1g/Gbp5/Nod2/Pycard/Kars/F2	16	14	ENSMUSG00000055782/ENSMUSG00000020826/ENSMUSG00000039384/ENSMUSG00000016024/ENSMUSG00000031378/ENSMUSG00000053318/ENSMUSG00000030281/ENSMUSG00000037902/ENSMUSG00000032508/ENSMUSG00000058715/ENSMUSG00000105504/ENSMUSG00000055994/ENSMUSG00000030793/ENSMUSG00000031948	2	ENSMUSG00000047123/ENSMUSG00000027249
BP	GO:0006638	neutral lipid metabolic process	23|1102	117|14957	1.22878e-05	0.000481589	ENSMUSG00000026385/ENSMUSG00000045294/ENSMUSG00000030827/ENSMUSG00000032080/ENSMUSG00000032193/ENSMUSG00000003123/ENSMUSG00000041567/ENSMUSG00000044254/ENSMUSG00000057074/ENSMUSG00000032083/ENSMUSG00000037071/ENSMUSG00000018796/ENSMUSG00000032540/ENSMUSG00000007036/ENSMUSG00000032114/ENSMUSG00000021340/ENSMUSG00000048486/ENSMUSG00000028553/ENSMUSG00000011305/ENSMUSG00000029314/ENSMUSG00000028158/…	Dbi/Insig1/Fgf21/Apoa4/Ldlr/Lipe/Serpina12/Pcsk9/Ces1g/Apoa1/Scd1/Acsl1/Abhd5/Abhd16a/Slc37a4/Gpld1/Fitm2/Angptl3/Plin5/Gpat3/Mttp/Pla2g16/Apoa5	23	10	ENSMUSG00000026385/ENSMUSG00000045294/ENSMUSG00000032193/ENSMUSG00000003123/ENSMUSG00000044254/ENSMUSG00000057074/ENSMUSG00000037071/ENSMUSG00000007036/ENSMUSG00000029314/ENSMUSG00000060675	13	ENSMUSG00000030827/ENSMUSG00000032080/ENSMUSG00000041567/ENSMUSG00000032083/ENSMUSG00000018796/ENSMUSG00000032540/ENSMUSG00000032114/ENSMUSG00000021340/ENSMUSG00000048486/ENSMUSG00000028553/ENSMUSG00000011305/ENSMUSG00000028158/ENSMUSG00000032079
BP	GO:0071677	positive regulation of mononuclear cell migration	9|1102	22|14957	1.279e-05	0.000497442	ENSMUSG00000049103/ENSMUSG00000035385/ENSMUSG00000052270/ENSMUSG00000034855/ENSMUSG00000023913/ENSMUSG00000024397/ENSMUSG00000050335/ENSMUSG00000035042/ENSMUSG00000025804	Ccr2/Ccl2/Fpr2/Cxcl10/Pla2g7/Aif1/Lgals3/Ccl5/Ccr1	9	8	ENSMUSG00000049103/ENSMUSG00000035385/ENSMUSG00000052270/ENSMUSG00000034855/ENSMUSG00000024397/ENSMUSG00000050335/ENSMUSG00000035042/ENSMUSG00000025804	1	ENSMUSG00000023913
BP	GO:0001818	negative regulation of cytokine production	37|1102	239|14957	1.30062e-05	0.000502021	ENSMUSG00000078817/ENSMUSG00000022126/ENSMUSG00000055782/ENSMUSG00000036986/ENSMUSG00000016024/ENSMUSG00000025494/ENSMUSG00000035914/ENSMUSG00000032083/ENSMUSG00000002983/ENSMUSG00000079363/ENSMUSG00000053175/ENSMUSG00000027995/ENSMUSG00000031378/ENSMUSG00000016496/ENSMUSG00000017830/ENSMUSG00000031451/ENSMUSG00000030341/ENSMUSG00000031805/ENSMUSG00000025813/ENSMUSG00000006014/ENSMUSG00000050350/…	Nlrp12/Acod1/Abcd2/Pml/Lbp/Sigirr/Cd276/Apoa1/Relb/Gbp4/Bcl3/Tlr2/Abcd1/Cd274/Dhx58/Gas6/Tnfrsf1a/Jak3/Homer2/Prg4/Gpr18/Cd2ap/Slc37a4/Igf1/Sirpa/Hsp90ab1/Nfkb1/Ubr5/Akap8/Nod2/Vsig4/Traf3ip1/Pycard/Lgals9/Tnfaip3/F2/Gpnmb	37	26	ENSMUSG00000022126/ENSMUSG00000055782/ENSMUSG00000036986/ENSMUSG00000016024/ENSMUSG00000025494/ENSMUSG00000035914/ENSMUSG00000002983/ENSMUSG00000079363/ENSMUSG00000053175/ENSMUSG00000027995/ENSMUSG00000031378/ENSMUSG00000016496/ENSMUSG00000017830/ENSMUSG00000031451/ENSMUSG00000030341/ENSMUSG00000031805/ENSMUSG00000006014/ENSMUSG00000050350/ENSMUSG00000061665/ENSMUSG00000037902/ENSMUSG00000023944/…	11	ENSMUSG00000078817/ENSMUSG00000032083/ENSMUSG00000025813/ENSMUSG00000032114/ENSMUSG00000020053/ENSMUSG00000037487/ENSMUSG00000024045/ENSMUSG00000044206/ENSMUSG00000034292/ENSMUSG00000027249/ENSMUSG00000029816
BP	GO:0050766	positive regulation of phagocytosis	17|1102	72|14957	1.37795e-05	0.000519311	ENSMUSG00000016024/ENSMUSG00000015947/ENSMUSG00000032083/ENSMUSG00000025314/ENSMUSG00000035385/ENSMUSG00000052270/ENSMUSG00000031451/ENSMUSG00000055447/ENSMUSG00000037902/ENSMUSG00000058715/ENSMUSG00000055994/ENSMUSG00000030793/ENSMUSG00000020143/ENSMUSG00000029254/ENSMUSG00000068227/ENSMUSG00000039145/ENSMUSG00000022868	Lbp/Fcgr1/Apoa1/Ptprj/Ccl2/Fpr2/Gas6/Cd47/Sirpa/Fcer1g/Nod2/Pycard/Dock2/Stap1/Il2rb/Camk1d/Ahsg	17	14	ENSMUSG00000016024/ENSMUSG00000015947/ENSMUSG00000025314/ENSMUSG00000035385/ENSMUSG00000052270/ENSMUSG00000031451/ENSMUSG00000055447/ENSMUSG00000037902/ENSMUSG00000058715/ENSMUSG00000055994/ENSMUSG00000030793/ENSMUSG00000020143/ENSMUSG00000068227/ENSMUSG00000039145	3	ENSMUSG00000032083/ENSMUSG00000029254/ENSMUSG00000022868
BP	GO:0032757	positive regulation of interleukin-8 production	13|1102	45|14957	1.38618e-05	0.000519311	ENSMUSG00000039217/ENSMUSG00000016024/ENSMUSG00000027995/ENSMUSG00000051439/ENSMUSG00000040296/ENSMUSG00000025083/ENSMUSG00000028191/ENSMUSG00000032508/ENSMUSG00000031639/ENSMUSG00000055994/ENSMUSG00000044827/ENSMUSG00000030793/ENSMUSG00000044583	Il18/Lbp/Tlr2/Cd14/Ddx58/Afap1l2/Bcl10/Myd88/Tlr3/Nod2/Tlr1/Pycard/Tlr7	13	12	ENSMUSG00000039217/ENSMUSG00000016024/ENSMUSG00000027995/ENSMUSG00000051439/ENSMUSG00000040296/ENSMUSG00000025083/ENSMUSG00000028191/ENSMUSG00000032508/ENSMUSG00000031639/ENSMUSG00000055994/ENSMUSG00000044827/ENSMUSG00000030793	1	ENSMUSG00000044583
BP	GO:0071675	regulation of mononuclear cell migration	13|1102	45|14957	1.38618e-05	0.000519311	ENSMUSG00000049103/ENSMUSG00000037362/ENSMUSG00000025314/ENSMUSG00000035385/ENSMUSG00000052270/ENSMUSG00000034855/ENSMUSG00000053318/ENSMUSG00000023913/ENSMUSG00000024397/ENSMUSG00000050335/ENSMUSG00000035042/ENSMUSG00000031948/ENSMUSG00000025804	Ccr2/Nov/Ptprj/Ccl2/Fpr2/Cxcl10/Slamf8/Pla2g7/Aif1/Lgals3/Ccl5/Kars/Ccr1	13	12	ENSMUSG00000049103/ENSMUSG00000037362/ENSMUSG00000025314/ENSMUSG00000035385/ENSMUSG00000052270/ENSMUSG00000034855/ENSMUSG00000053318/ENSMUSG00000024397/ENSMUSG00000050335/ENSMUSG00000035042/ENSMUSG00000031948/ENSMUSG00000025804	1	ENSMUSG00000023913
BP	GO:0046394	carboxylic acid biosynthetic process	46|1102	325|14957	1.38619e-05	0.000519311	ENSMUSG00000027533/ENSMUSG00000055782/ENSMUSG00000045294/ENSMUSG00000013629/ENSMUSG00000017390/ENSMUSG00000032080/ENSMUSG00000029201/ENSMUSG00000008035/ENSMUSG00000032349/ENSMUSG00000025190/ENSMUSG00000020917/ENSMUSG00000032883/ENSMUSG00000034450/ENSMUSG00000044005/ENSMUSG00000025203/ENSMUSG00000027199/ENSMUSG00000028671/ENSMUSG00000037071/ENSMUSG00000010175/ENSMUSG00000000628/ENSMUSG00000042010/…	Fabp5/Abcd2/Insig1/Cad/Aldoc/Apoa4/Ugdh/Mid1ip1/Elovl5/Got1/Acly/Acsl3/Gulo/Gls2/Scd2/Gatm/Gale/Scd1/Prox1/Hk2/Acacb/Bhmt/Fads3/Abcd1/Slc2a6/Pkm/Igf1/Hk3/Gpd1/Pklr/Acss2/Tecr/Nfkb1/Adpgk/Cyp7b1/Stat3/Fads6/Hk1/Apoa5/Pfkp/Gch1/Slc27a2/Acsm3/Gm5424/Gck/Acot12	46	29	ENSMUSG00000055782/ENSMUSG00000045294/ENSMUSG00000017390/ENSMUSG00000029201/ENSMUSG00000008035/ENSMUSG00000032349/ENSMUSG00000025190/ENSMUSG00000020917/ENSMUSG00000032883/ENSMUSG00000044005/ENSMUSG00000025203/ENSMUSG00000027199/ENSMUSG00000028671/ENSMUSG00000037071/ENSMUSG00000000628/ENSMUSG00000042010/ENSMUSG00000024664/ENSMUSG00000031378/ENSMUSG00000036067/ENSMUSG00000032294/ENSMUSG00000025877/…	17	ENSMUSG00000027533/ENSMUSG00000013629/ENSMUSG00000032080/ENSMUSG00000034450/ENSMUSG00000010175/ENSMUSG00000074768/ENSMUSG00000020053/ENSMUSG00000023019/ENSMUSG00000041237/ENSMUSG00000025236/ENSMUSG00000039519/ENSMUSG00000044788/ENSMUSG00000032079/ENSMUSG00000027359/ENSMUSG00000030935/ENSMUSG00000041798/ENSMUSG00000021620
BP	GO:0032637	interleukin-8 production	16|1102	65|14957	1.39782e-05	0.000519847	ENSMUSG00000020826/ENSMUSG00000039217/ENSMUSG00000016024/ENSMUSG00000064246/ENSMUSG00000053175/ENSMUSG00000027995/ENSMUSG00000051439/ENSMUSG00000040296/ENSMUSG00000025083/ENSMUSG00000028191/ENSMUSG00000032508/ENSMUSG00000031639/ENSMUSG00000055994/ENSMUSG00000044827/ENSMUSG00000030793/ENSMUSG00000044583	Nos2/Il18/Lbp/Chil1/Bcl3/Tlr2/Cd14/Ddx58/Afap1l2/Bcl10/Myd88/Tlr3/Nod2/Tlr1/Pycard/Tlr7	16	15	ENSMUSG00000020826/ENSMUSG00000039217/ENSMUSG00000016024/ENSMUSG00000064246/ENSMUSG00000053175/ENSMUSG00000027995/ENSMUSG00000051439/ENSMUSG00000040296/ENSMUSG00000025083/ENSMUSG00000028191/ENSMUSG00000032508/ENSMUSG00000031639/ENSMUSG00000055994/ENSMUSG00000044827/ENSMUSG00000030793	1	ENSMUSG00000044583
BP	GO:0002534	cytokine production involved in inflammatory response	12|1102	39|14957	1.45644e-05	0.000537721	ENSMUSG00000055782/ENSMUSG00000020826/ENSMUSG00000031378/ENSMUSG00000030281/ENSMUSG00000047123/ENSMUSG00000037902/ENSMUSG00000032508/ENSMUSG00000105504/ENSMUSG00000055994/ENSMUSG00000030793/ENSMUSG00000031948/ENSMUSG00000027249	Abcd2/Nos2/Abcd1/Il17rc/Ticam1/Sirpa/Myd88/Gbp5/Nod2/Pycard/Kars/F2	12	10	ENSMUSG00000055782/ENSMUSG00000020826/ENSMUSG00000031378/ENSMUSG00000030281/ENSMUSG00000037902/ENSMUSG00000032508/ENSMUSG00000105504/ENSMUSG00000055994/ENSMUSG00000030793/ENSMUSG00000031948	2	ENSMUSG00000047123/ENSMUSG00000027249
BP	GO:0016053	organic acid biosynthetic process	46|1102	326|14957	1.50185e-05	0.000550496	ENSMUSG00000027533/ENSMUSG00000055782/ENSMUSG00000045294/ENSMUSG00000013629/ENSMUSG00000017390/ENSMUSG00000032080/ENSMUSG00000029201/ENSMUSG00000008035/ENSMUSG00000032349/ENSMUSG00000025190/ENSMUSG00000020917/ENSMUSG00000032883/ENSMUSG00000034450/ENSMUSG00000044005/ENSMUSG00000025203/ENSMUSG00000027199/ENSMUSG00000028671/ENSMUSG00000037071/ENSMUSG00000010175/ENSMUSG00000000628/ENSMUSG00000042010/…	Fabp5/Abcd2/Insig1/Cad/Aldoc/Apoa4/Ugdh/Mid1ip1/Elovl5/Got1/Acly/Acsl3/Gulo/Gls2/Scd2/Gatm/Gale/Scd1/Prox1/Hk2/Acacb/Bhmt/Fads3/Abcd1/Slc2a6/Pkm/Igf1/Hk3/Gpd1/Pklr/Acss2/Tecr/Nfkb1/Adpgk/Cyp7b1/Stat3/Fads6/Hk1/Apoa5/Pfkp/Gch1/Slc27a2/Acsm3/Gm5424/Gck/Acot12	46	29	ENSMUSG00000055782/ENSMUSG00000045294/ENSMUSG00000017390/ENSMUSG00000029201/ENSMUSG00000008035/ENSMUSG00000032349/ENSMUSG00000025190/ENSMUSG00000020917/ENSMUSG00000032883/ENSMUSG00000044005/ENSMUSG00000025203/ENSMUSG00000027199/ENSMUSG00000028671/ENSMUSG00000037071/ENSMUSG00000000628/ENSMUSG00000042010/ENSMUSG00000024664/ENSMUSG00000031378/ENSMUSG00000036067/ENSMUSG00000032294/ENSMUSG00000025877/…	17	ENSMUSG00000027533/ENSMUSG00000013629/ENSMUSG00000032080/ENSMUSG00000034450/ENSMUSG00000010175/ENSMUSG00000074768/ENSMUSG00000020053/ENSMUSG00000023019/ENSMUSG00000041237/ENSMUSG00000025236/ENSMUSG00000039519/ENSMUSG00000044788/ENSMUSG00000032079/ENSMUSG00000027359/ENSMUSG00000030935/ENSMUSG00000041798/ENSMUSG00000021620
BP	GO:0006732	coenzyme metabolic process	44|1102	307|14957	1.54647e-05	0.000562805	ENSMUSG00000042102/ENSMUSG00000017390/ENSMUSG00000039616/ENSMUSG00000015806/ENSMUSG00000032350/ENSMUSG00000020917/ENSMUSG00000037847/ENSMUSG00000034450/ENSMUSG00000024556/ENSMUSG00000028671/ENSMUSG00000000628/ENSMUSG00000042010/ENSMUSG00000032047/ENSMUSG00000031378/ENSMUSG00000018796/ENSMUSG00000036067/ENSMUSG00000028603/ENSMUSG00000027952/ENSMUSG00000032294/ENSMUSG00000072949/ENSMUSG00000041939/…	Dmgdh/Aldoc/Mocos/Qdpr/Gclc/Acly/Nmrk1/Gulo/Me2/Gale/Hk2/Acacb/Acat1/Abcd1/Acsl1/Slc2a6/Scp2/Pmvk/Pkm/Acot1/Mvk/Pgd/Aldh1l1/Pdk3/Igf1/Hk3/Far1/Tkt/Gpd1/Hmgcs2/Pklr/Coq8b/Acss2/Hmgcs1/Adpgk/Stat3/Pank4/Hk1/Pfkp/Gch1/Acsm3/Idh1/Gck/Acot12	44	28	ENSMUSG00000017390/ENSMUSG00000039616/ENSMUSG00000015806/ENSMUSG00000032350/ENSMUSG00000020917/ENSMUSG00000024556/ENSMUSG00000028671/ENSMUSG00000000628/ENSMUSG00000042010/ENSMUSG00000031378/ENSMUSG00000036067/ENSMUSG00000027952/ENSMUSG00000032294/ENSMUSG00000041939/ENSMUSG00000028961/ENSMUSG00000030088/ENSMUSG00000035232/ENSMUSG00000025877/ENSMUSG00000030759/ENSMUSG00000021957/ENSMUSG00000003762/…	16	ENSMUSG00000042102/ENSMUSG00000037847/ENSMUSG00000034450/ENSMUSG00000032047/ENSMUSG00000018796/ENSMUSG00000028603/ENSMUSG00000072949/ENSMUSG00000020053/ENSMUSG00000023019/ENSMUSG00000027875/ENSMUSG00000041237/ENSMUSG00000025236/ENSMUSG00000029056/ENSMUSG00000030935/ENSMUSG00000041798/ENSMUSG00000021620
BP	GO:0060760	positive regulation of response to cytokine stimulus	14|1102	52|14957	1.59331e-05	0.000571683	ENSMUSG00000025498/ENSMUSG00000030895/ENSMUSG00000074151/ENSMUSG00000026072/ENSMUSG00000069874/ENSMUSG00000034422/ENSMUSG00000027514/ENSMUSG00000046879/ENSMUSG00000027995/ENSMUSG00000031451/ENSMUSG00000040296/ENSMUSG00000040329/ENSMUSG00000025888/ENSMUSG00000020115	Irf7/Hpx/Nlrc5/Il1r1/Irgm2/Parp14/Zbp1/Irgm1/Tlr2/Gas6/Ddx58/Il7/Casp1/Tbk1	14	13	ENSMUSG00000025498/ENSMUSG00000030895/ENSMUSG00000074151/ENSMUSG00000069874/ENSMUSG00000034422/ENSMUSG00000027514/ENSMUSG00000046879/ENSMUSG00000027995/ENSMUSG00000031451/ENSMUSG00000040296/ENSMUSG00000040329/ENSMUSG00000025888/ENSMUSG00000020115	1	ENSMUSG00000026072
BP	GO:0061900	glial cell activation	14|1102	52|14957	1.59331e-05	0.000571683	ENSMUSG00000030560/ENSMUSG00000032193/ENSMUSG00000020122/ENSMUSG00000052270/ENSMUSG00000024789/ENSMUSG00000027995/ENSMUSG00000015599/ENSMUSG00000024397/ENSMUSG00000031639/ENSMUSG00000025888/ENSMUSG00000044827/ENSMUSG00000020178/ENSMUSG00000044583/ENSMUSG00000029254	Ctsc/Ldlr/Egfr/Fpr2/Jak2/Tlr2/Ttbk1/Aif1/Tlr3/Casp1/Tlr1/Adora2a/Tlr7/Stap1	14	10	ENSMUSG00000030560/ENSMUSG00000032193/ENSMUSG00000052270/ENSMUSG00000024789/ENSMUSG00000027995/ENSMUSG00000024397/ENSMUSG00000031639/ENSMUSG00000025888/ENSMUSG00000044827/ENSMUSG00000020178	4	ENSMUSG00000020122/ENSMUSG00000015599/ENSMUSG00000044583/ENSMUSG00000029254
BP	GO:0005975	carbohydrate metabolic process	61|1102	478|14957	1.67848e-05	0.000598032	ENSMUSG00000027533/ENSMUSG00000027808/ENSMUSG00000074264/ENSMUSG00000003226/ENSMUSG00000017390/ENSMUSG00000032350/ENSMUSG00000035836/ENSMUSG00000029201/ENSMUSG00000025271/ENSMUSG00000025190/ENSMUSG00000041567/ENSMUSG00000057963/ENSMUSG00000040809/ENSMUSG00000043998/ENSMUSG00000031594/ENSMUSG00000064246/ENSMUSG00000026641/ENSMUSG00000034450/ENSMUSG00000048612/ENSMUSG00000032038/ENSMUSG00000028671/…	Fabp5/Serp1/Amy1/Ranbp2/Aldoc/Gclc/Ugt2b1/Ugdh/Pfkfb1/Got1/Serpina12/Itpk1/Chil3/Mgat2/Fgl1/Chil1/Usf1/Gulo/Myof/St3gal4/Gale/Hk2/Acacb/Slc2a6/B3galt1/Rbp4/Pkm/Impa2/Isyna1/Chst11/Pgd/Casd1/Slc37a4/Pdk3/Igf1/Hk3/Fuom/Fuca2/Igfbp4/Gpd1/Plek/Gpld1/Braf/Pklr/Angptl3/Idnk/Mup1/Gla/Ganab/Man1c1/Nfkb1/Adpgk/Stat3/Hk1/Ddb1/Pfkp/Atf3/Igfbp3/Idh1/Gck/Phlda2	61	34	ENSMUSG00000017390/ENSMUSG00000032350/ENSMUSG00000029201/ENSMUSG00000025190/ENSMUSG00000057963/ENSMUSG00000040809/ENSMUSG00000031594/ENSMUSG00000064246/ENSMUSG00000026641/ENSMUSG00000048612/ENSMUSG00000028671/ENSMUSG00000000628/ENSMUSG00000042010/ENSMUSG00000036067/ENSMUSG00000032294/ENSMUSG00000024525/ENSMUSG00000019139/ENSMUSG00000034612/ENSMUSG00000028961/ENSMUSG00000035232/ENSMUSG00000025877/…	27	ENSMUSG00000027533/ENSMUSG00000027808/ENSMUSG00000074264/ENSMUSG00000003226/ENSMUSG00000035836/ENSMUSG00000025271/ENSMUSG00000041567/ENSMUSG00000043998/ENSMUSG00000034450/ENSMUSG00000032038/ENSMUSG00000034780/ENSMUSG00000024990/ENSMUSG00000015189/ENSMUSG00000032114/ENSMUSG00000020053/ENSMUSG00000017493/ENSMUSG00000023019/ENSMUSG00000021340/ENSMUSG00000002413/ENSMUSG00000041237/ENSMUSG00000028553/…
BP	GO:0019373	epoxygenase P450 pathway	10|1102	28|14957	1.73923e-05	0.000615375	ENSMUSG00000003053/ENSMUSG00000042248/ENSMUSG00000060613/ENSMUSG00000062624/ENSMUSG00000060407/ENSMUSG00000054827/ENSMUSG00000025002/ENSMUSG00000030483/ENSMUSG00000074882/ENSMUSG00000052914	Cyp2c29/Cyp2c37/Cyp2c70/Cyp2c67/Cyp2a12/Cyp2c50/Cyp2c55/Cyp2b10/Cyp2c68/Cyp2j6	10	5	ENSMUSG00000003053/ENSMUSG00000042248/ENSMUSG00000054827/ENSMUSG00000025002/ENSMUSG00000030483	5	ENSMUSG00000060613/ENSMUSG00000062624/ENSMUSG00000060407/ENSMUSG00000074882/ENSMUSG00000052914
BP	GO:0072330	monocarboxylic acid biosynthetic process	36|1102	233|14957	1.77155e-05	0.000622486	ENSMUSG00000027533/ENSMUSG00000055782/ENSMUSG00000045294/ENSMUSG00000017390/ENSMUSG00000032080/ENSMUSG00000008035/ENSMUSG00000032349/ENSMUSG00000020917/ENSMUSG00000032883/ENSMUSG00000025203/ENSMUSG00000028671/ENSMUSG00000037071/ENSMUSG00000010175/ENSMUSG00000000628/ENSMUSG00000042010/ENSMUSG00000024664/ENSMUSG00000031378/ENSMUSG00000036067/ENSMUSG00000032294/ENSMUSG00000020053/ENSMUSG00000025877/…	Fabp5/Abcd2/Insig1/Aldoc/Apoa4/Mid1ip1/Elovl5/Acly/Acsl3/Scd2/Gale/Scd1/Prox1/Hk2/Acacb/Fads3/Abcd1/Slc2a6/Pkm/Igf1/Hk3/Gpd1/Pklr/Acss2/Tecr/Adpgk/Cyp7b1/Stat3/Fads6/Hk1/Apoa5/Pfkp/Slc27a2/Acsm3/Gck/Acot12	36	22	ENSMUSG00000055782/ENSMUSG00000045294/ENSMUSG00000017390/ENSMUSG00000008035/ENSMUSG00000032349/ENSMUSG00000020917/ENSMUSG00000032883/ENSMUSG00000025203/ENSMUSG00000028671/ENSMUSG00000037071/ENSMUSG00000000628/ENSMUSG00000042010/ENSMUSG00000024664/ENSMUSG00000031378/ENSMUSG00000036067/ENSMUSG00000032294/ENSMUSG00000025877/ENSMUSG00000027605/ENSMUSG00000031708/ENSMUSG00000004040/ENSMUSG00000037012/…	14	ENSMUSG00000027533/ENSMUSG00000032080/ENSMUSG00000010175/ENSMUSG00000020053/ENSMUSG00000023019/ENSMUSG00000041237/ENSMUSG00000025236/ENSMUSG00000039519/ENSMUSG00000044788/ENSMUSG00000032079/ENSMUSG00000027359/ENSMUSG00000030935/ENSMUSG00000041798/ENSMUSG00000021620
BP	GO:1901617	organic hydroxy compound biosynthetic process	32|1102	197|14957	1.84351e-05	0.000643336	ENSMUSG00000017754/ENSMUSG00000036585/ENSMUSG00000045294/ENSMUSG00000032018/ENSMUSG00000015806/ENSMUSG00000032080/ENSMUSG00000025190/ENSMUSG00000024140/ENSMUSG00000032083/ENSMUSG00000024799/ENSMUSG00000010175/ENSMUSG00000022351/ENSMUSG00000028603/ENSMUSG00000027952/ENSMUSG00000019139/ENSMUSG00000041939/ENSMUSG00000060733/ENSMUSG00000021252/ENSMUSG00000020120/ENSMUSG00000027875/ENSMUSG00000030670/…	Pltp/Fgf1/Insig1/Sc5d/Qdpr/Apoa4/Got1/Epas1/Apoa1/Tm7sf2/Prox1/Sqle/Scp2/Pmvk/Isyna1/Mvk/Ipmk/Erg28/Plek/Hmgcs2/Cyp2r1/Plcg2/Lbr/Nsdhl/Nfkb1/Hmgcs1/Cyp7b1/Apoa5/Msmo1/Gch1/Slc27a2/Dhdds	32	20	ENSMUSG00000045294/ENSMUSG00000032018/ENSMUSG00000015806/ENSMUSG00000025190/ENSMUSG00000024799/ENSMUSG00000022351/ENSMUSG00000027952/ENSMUSG00000019139/ENSMUSG00000041939/ENSMUSG00000060733/ENSMUSG00000021252/ENSMUSG00000020120/ENSMUSG00000030670/ENSMUSG00000034330/ENSMUSG00000004880/ENSMUSG00000031349/ENSMUSG00000028163/ENSMUSG00000093930/ENSMUSG00000031604/ENSMUSG00000037580	12	ENSMUSG00000017754/ENSMUSG00000036585/ENSMUSG00000032080/ENSMUSG00000024140/ENSMUSG00000032083/ENSMUSG00000010175/ENSMUSG00000028603/ENSMUSG00000027875/ENSMUSG00000039519/ENSMUSG00000032079/ENSMUSG00000027359/ENSMUSG00000012117
BP	GO:0042737	drug catabolic process	23|1102	120|14957	1.89171e-05	0.000655663	ENSMUSG00000003053/ENSMUSG00000031722/ENSMUSG00000042248/ENSMUSG00000060613/ENSMUSG00000015806/ENSMUSG00000032080/ENSMUSG00000027261/ENSMUSG00000062624/ENSMUSG00000040809/ENSMUSG00000060407/ENSMUSG00000032047/ENSMUSG00000054827/ENSMUSG00000025002/ENSMUSG00000025464/ENSMUSG00000027333/ENSMUSG00000030483/ENSMUSG00000074882/ENSMUSG00000030670/ENSMUSG00000022186/ENSMUSG00000026692/ENSMUSG00000052914/…	Cyp2c29/Hp/Cyp2c37/Cyp2c70/Qdpr/Apoa4/Hao1/Cyp2c67/Chil3/Cyp2a12/Acat1/Cyp2c50/Cyp2c55/Paox/Smox/Cyp2b10/Cyp2c68/Cyp2r1/Oxct1/Fmo4/Cyp2j6/Dpys/Hbb-bs	23	14	ENSMUSG00000003053/ENSMUSG00000031722/ENSMUSG00000042248/ENSMUSG00000015806/ENSMUSG00000040809/ENSMUSG00000054827/ENSMUSG00000025002/ENSMUSG00000025464/ENSMUSG00000027333/ENSMUSG00000030483/ENSMUSG00000030670/ENSMUSG00000022186/ENSMUSG00000026692/ENSMUSG00000052305	9	ENSMUSG00000060613/ENSMUSG00000032080/ENSMUSG00000027261/ENSMUSG00000062624/ENSMUSG00000060407/ENSMUSG00000032047/ENSMUSG00000074882/ENSMUSG00000052914/ENSMUSG00000022304
BP	GO:0035455	response to interferon-alpha	9|1102	23|14957	1.96419e-05	0.000676186	ENSMUSG00000074896/ENSMUSG00000046718/ENSMUSG00000078922/ENSMUSG00000025492/ENSMUSG00000034459/ENSMUSG00000031451/ENSMUSG00000045932/ENSMUSG00000060591/ENSMUSG00000032369	Ifit3/Bst2/Tgtp1/Ifitm3/Ifit1/Gas6/Ifit2/Ifitm2/Plscr1	9	9	ENSMUSG00000074896/ENSMUSG00000046718/ENSMUSG00000078922/ENSMUSG00000025492/ENSMUSG00000034459/ENSMUSG00000031451/ENSMUSG00000045932/ENSMUSG00000060591/ENSMUSG00000032369	0
BP	GO:0007249	I-kappaB kinase/NF-kappaB signaling	30|1102	180|14957	2.00849e-05	0.000682125	ENSMUSG00000040026/ENSMUSG00000046688/ENSMUSG00000078817/ENSMUSG00000008305/ENSMUSG00000035186/ENSMUSG00000049625/ENSMUSG00000037820/ENSMUSG00000026104/ENSMUSG00000002983/ENSMUSG00000018899/ENSMUSG00000053175/ENSMUSG00000027995/ENSMUSG00000004951/ENSMUSG00000029826/ENSMUSG00000028191/ENSMUSG00000047123/ENSMUSG00000037902/ENSMUSG00000032508/ENSMUSG00000031639/ENSMUSG00000025888/ENSMUSG00000026637/…	Saa3/Tifa/Nlrp12/Tle1/Ubd/Tifab/Tgm2/Stat1/Relb/Irf1/Bcl3/Tlr2/Hspb1/Zc3hav1/Bcl10/Ticam1/Sirpa/Myd88/Tlr3/Casp1/Traf5/Ikbkap/Sqstm1/Nod2/Tnfsf10/Pycard/Tlr7/Il1rn/Tnfaip3/Malt1	30	25	ENSMUSG00000040026/ENSMUSG00000046688/ENSMUSG00000035186/ENSMUSG00000049625/ENSMUSG00000037820/ENSMUSG00000026104/ENSMUSG00000002983/ENSMUSG00000018899/ENSMUSG00000053175/ENSMUSG00000027995/ENSMUSG00000004951/ENSMUSG00000029826/ENSMUSG00000028191/ENSMUSG00000037902/ENSMUSG00000032508/ENSMUSG00000031639/ENSMUSG00000025888/ENSMUSG00000026637/ENSMUSG00000015837/ENSMUSG00000055994/ENSMUSG00000039304/…	5	ENSMUSG00000078817/ENSMUSG00000008305/ENSMUSG00000047123/ENSMUSG00000028431/ENSMUSG00000044583
BP	GO:0045824	negative regulation of innate immune response	14|1102	53|14957	2.01991e-05	0.000682125	ENSMUSG00000074151/ENSMUSG00000022126/ENSMUSG00000042726/ENSMUSG00000034422/ENSMUSG00000039384/ENSMUSG00000037321/ENSMUSG00000045827/ENSMUSG00000030157/ENSMUSG00000017830/ENSMUSG00000053318/ENSMUSG00000044206/ENSMUSG00000001123/ENSMUSG00000025804/ENSMUSG00000019850	Nlrc5/Acod1/Trafd1/Parp14/Dusp10/Tap1/Serpinb9/Clec2d/Dhx58/Slamf8/Vsig4/Lgals9/Ccr1/Tnfaip3	14	13	ENSMUSG00000074151/ENSMUSG00000022126/ENSMUSG00000042726/ENSMUSG00000034422/ENSMUSG00000039384/ENSMUSG00000037321/ENSMUSG00000045827/ENSMUSG00000030157/ENSMUSG00000017830/ENSMUSG00000053318/ENSMUSG00000001123/ENSMUSG00000025804/ENSMUSG00000019850	1	ENSMUSG00000044206
BP	GO:0006694	steroid biosynthetic process	25|1102	137|14957	2.02161e-05	0.000682125	ENSMUSG00000036585/ENSMUSG00000045294/ENSMUSG00000032018/ENSMUSG00000032080/ENSMUSG00000032083/ENSMUSG00000024799/ENSMUSG00000010175/ENSMUSG00000022351/ENSMUSG00000028603/ENSMUSG00000027952/ENSMUSG00000041939/ENSMUSG00000020053/ENSMUSG00000021252/ENSMUSG00000027875/ENSMUSG00000030670/ENSMUSG00000004880/ENSMUSG00000031349/ENSMUSG00000031708/ENSMUSG00000028163/ENSMUSG00000093930/ENSMUSG00000039519/…	Fgf1/Insig1/Sc5d/Apoa4/Apoa1/Tm7sf2/Prox1/Sqle/Scp2/Pmvk/Mvk/Igf1/Erg28/Hmgcs2/Cyp2r1/Lbr/Nsdhl/Tecr/Nfkb1/Hmgcs1/Cyp7b1/Hsd3b2/Apoa5/Msmo1/Slc27a2	25	14	ENSMUSG00000045294/ENSMUSG00000032018/ENSMUSG00000024799/ENSMUSG00000022351/ENSMUSG00000027952/ENSMUSG00000041939/ENSMUSG00000021252/ENSMUSG00000030670/ENSMUSG00000004880/ENSMUSG00000031349/ENSMUSG00000031708/ENSMUSG00000028163/ENSMUSG00000093930/ENSMUSG00000031604	11	ENSMUSG00000036585/ENSMUSG00000032080/ENSMUSG00000032083/ENSMUSG00000010175/ENSMUSG00000028603/ENSMUSG00000020053/ENSMUSG00000027875/ENSMUSG00000039519/ENSMUSG00000063730/ENSMUSG00000032079/ENSMUSG00000027359
BP	GO:0070663	regulation of leukocyte proliferation	33|1102	207|14957	2.04156e-05	0.000684325	ENSMUSG00000031628/ENSMUSG00000042333/ENSMUSG00000049103/ENSMUSG00000039217/ENSMUSG00000035914/ENSMUSG00000004043/ENSMUSG00000039323/ENSMUSG00000018899/ENSMUSG00000051457/ENSMUSG00000115338/ENSMUSG00000016496/ENSMUSG00000028076/ENSMUSG00000031805/ENSMUSG00000040329/ENSMUSG00000039981/ENSMUSG00000031101/ENSMUSG00000020053/ENSMUSG00000047123/ENSMUSG00000000732/ENSMUSG00000030707/ENSMUSG00000032508/…	Casp3/Tnfrsf14/Ccr2/Il18/Cd276/Stat5a/Igfbp2/Irf1/Spn/Pnp/Cd274/Cd1d1/Jak3/Il7/Zc3h12d/Sash3/Igf1/Ticam1/Icosl/Coro1a/Myd88/Aif1/Tnfsf13b/Lgals3/Rac2/Ccl5/Vsig4/Slfn1/Il27/Pycard/Lgals9/Bst1/Gpnmb	33	28	ENSMUSG00000031628/ENSMUSG00000042333/ENSMUSG00000049103/ENSMUSG00000039217/ENSMUSG00000035914/ENSMUSG00000004043/ENSMUSG00000018899/ENSMUSG00000051457/ENSMUSG00000115338/ENSMUSG00000016496/ENSMUSG00000028076/ENSMUSG00000031805/ENSMUSG00000040329/ENSMUSG00000039981/ENSMUSG00000031101/ENSMUSG00000000732/ENSMUSG00000030707/ENSMUSG00000032508/ENSMUSG00000024397/ENSMUSG00000031497/ENSMUSG00000050335/…	5	ENSMUSG00000039323/ENSMUSG00000020053/ENSMUSG00000047123/ENSMUSG00000044206/ENSMUSG00000029816
BP	GO:0032651	regulation of interleukin-1 beta production	16|1102	67|14957	2.10746e-05	0.000690432	ENSMUSG00000036986/ENSMUSG00000022575/ENSMUSG00000032083/ENSMUSG00000031934/ENSMUSG00000024789/ENSMUSG00000027995/ENSMUSG00000004951/ENSMUSG00000020053/ENSMUSG00000070390/ENSMUSG00000037902/ENSMUSG00000025888/ENSMUSG00000055994/ENSMUSG00000037012/ENSMUSG00000030793/ENSMUSG00000019850/ENSMUSG00000032688	Pml/Gsdmd/Apoa1/Panx1/Jak2/Tlr2/Hspb1/Igf1/Nlrp1b/Sirpa/Casp1/Nod2/Hk1/Pycard/Tnfaip3/Malt1	16	14	ENSMUSG00000036986/ENSMUSG00000022575/ENSMUSG00000031934/ENSMUSG00000024789/ENSMUSG00000027995/ENSMUSG00000004951/ENSMUSG00000070390/ENSMUSG00000037902/ENSMUSG00000025888/ENSMUSG00000055994/ENSMUSG00000037012/ENSMUSG00000030793/ENSMUSG00000019850/ENSMUSG00000032688	2	ENSMUSG00000032083/ENSMUSG00000020053
BP	GO:0071674	mononuclear cell migration	16|1102	67|14957	2.10746e-05	0.000690432	ENSMUSG00000049103/ENSMUSG00000037362/ENSMUSG00000025314/ENSMUSG00000035385/ENSMUSG00000052270/ENSMUSG00000034855/ENSMUSG00000053318/ENSMUSG00000023913/ENSMUSG00000055447/ENSMUSG00000037902/ENSMUSG00000024397/ENSMUSG00000050335/ENSMUSG00000035042/ENSMUSG00000031948/ENSMUSG00000025804/ENSMUSG00000030223	Ccr2/Nov/Ptprj/Ccl2/Fpr2/Cxcl10/Slamf8/Pla2g7/Cd47/Sirpa/Aif1/Lgals3/Ccl5/Kars/Ccr1/Ptpro	16	15	ENSMUSG00000049103/ENSMUSG00000037362/ENSMUSG00000025314/ENSMUSG00000035385/ENSMUSG00000052270/ENSMUSG00000034855/ENSMUSG00000053318/ENSMUSG00000055447/ENSMUSG00000037902/ENSMUSG00000024397/ENSMUSG00000050335/ENSMUSG00000035042/ENSMUSG00000031948/ENSMUSG00000025804/ENSMUSG00000030223	1	ENSMUSG00000023913
BP	GO:0002687	positive regulation of leukocyte migration	24|1102	129|14957	2.11e-05	0.000690432	ENSMUSG00000026072/ENSMUSG00000042333/ENSMUSG00000049103/ENSMUSG00000037405/ENSMUSG00000027009/ENSMUSG00000016024/ENSMUSG00000025314/ENSMUSG00000051457/ENSMUSG00000035385/ENSMUSG00000052270/ENSMUSG00000027995/ENSMUSG00000024942/ENSMUSG00000031451/ENSMUSG00000034855/ENSMUSG00000023913/ENSMUSG00000024397/ENSMUSG00000050335/ENSMUSG00000033220/ENSMUSG00000035042/ENSMUSG00000030793/ENSMUSG00000001123/…	Il1r1/Tnfrsf14/Ccr2/Icam1/Itga4/Lbp/Ptprj/Spn/Ccl2/Fpr2/Tlr2/Capn1/Gas6/Cxcl10/Pla2g7/Aif1/Lgals3/Rac2/Ccl5/Pycard/Lgals9/Kars/Ccr1/Camk1d	24	22	ENSMUSG00000042333/ENSMUSG00000049103/ENSMUSG00000037405/ENSMUSG00000027009/ENSMUSG00000016024/ENSMUSG00000025314/ENSMUSG00000051457/ENSMUSG00000035385/ENSMUSG00000052270/ENSMUSG00000027995/ENSMUSG00000024942/ENSMUSG00000031451/ENSMUSG00000034855/ENSMUSG00000024397/ENSMUSG00000050335/ENSMUSG00000033220/ENSMUSG00000035042/ENSMUSG00000030793/ENSMUSG00000001123/ENSMUSG00000031948/ENSMUSG00000025804/…	2	ENSMUSG00000026072/ENSMUSG00000023913
BP	GO:0150076	neuroinflammatory response	15|1102	60|14957	2.11398e-05	0.000690432	ENSMUSG00000030560/ENSMUSG00000032193/ENSMUSG00000020122/ENSMUSG00000052270/ENSMUSG00000024789/ENSMUSG00000027995/ENSMUSG00000015599/ENSMUSG00000020053/ENSMUSG00000024397/ENSMUSG00000031639/ENSMUSG00000025888/ENSMUSG00000044827/ENSMUSG00000020178/ENSMUSG00000044583/ENSMUSG00000029254	Ctsc/Ldlr/Egfr/Fpr2/Jak2/Tlr2/Ttbk1/Igf1/Aif1/Tlr3/Casp1/Tlr1/Adora2a/Tlr7/Stap1	15	10	ENSMUSG00000030560/ENSMUSG00000032193/ENSMUSG00000052270/ENSMUSG00000024789/ENSMUSG00000027995/ENSMUSG00000024397/ENSMUSG00000031639/ENSMUSG00000025888/ENSMUSG00000044827/ENSMUSG00000020178	5	ENSMUSG00000020122/ENSMUSG00000015599/ENSMUSG00000020053/ENSMUSG00000044583/ENSMUSG00000029254
BP	GO:1990266	neutrophil migration	20|1102	97|14957	2.16006e-05	0.000700988	ENSMUSG00000029417/ENSMUSG00000026072/ENSMUSG00000016024/ENSMUSG00000035385/ENSMUSG00000056071/ENSMUSG00000034855/ENSMUSG00000053318/ENSMUSG00000032114/ENSMUSG00000000290/ENSMUSG00000032508/ENSMUSG00000050335/ENSMUSG00000058715/ENSMUSG00000033220/ENSMUSG00000028859/ENSMUSG00000055994/ENSMUSG00000035042/ENSMUSG00000029082/ENSMUSG00000026981/ENSMUSG00000022865/ENSMUSG00000039145	Cxcl9/Il1r1/Lbp/Ccl2/S100a9/Cxcl10/Slamf8/Slc37a4/Itgb2/Myd88/Lgals3/Fcer1g/Rac2/Csf3r/Nod2/Ccl5/Bst1/Il1rn/Cxadr/Camk1d	20	18	ENSMUSG00000029417/ENSMUSG00000016024/ENSMUSG00000035385/ENSMUSG00000056071/ENSMUSG00000034855/ENSMUSG00000053318/ENSMUSG00000000290/ENSMUSG00000032508/ENSMUSG00000050335/ENSMUSG00000058715/ENSMUSG00000033220/ENSMUSG00000028859/ENSMUSG00000055994/ENSMUSG00000035042/ENSMUSG00000029082/ENSMUSG00000026981/ENSMUSG00000022865/ENSMUSG00000039145	2	ENSMUSG00000026072/ENSMUSG00000032114
BP	GO:0042116	macrophage activation	18|1102	82|14957	2.26455e-05	0.000726047	ENSMUSG00000030560/ENSMUSG00000032193/ENSMUSG00000016024/ENSMUSG00000052270/ENSMUSG00000024789/ENSMUSG00000027995/ENSMUSG00000015599/ENSMUSG00000028076/ENSMUSG00000047123/ENSMUSG00000024397/ENSMUSG00000031639/ENSMUSG00000025888/ENSMUSG00000044827/ENSMUSG00000001123/ENSMUSG00000031948/ENSMUSG00000044583/ENSMUSG00000079685/ENSMUSG00000029254	Ctsc/Ldlr/Lbp/Fpr2/Jak2/Tlr2/Ttbk1/Cd1d1/Ticam1/Aif1/Tlr3/Casp1/Tlr1/Lgals9/Kars/Tlr7/Ulbp1/Stap1	18	14	ENSMUSG00000030560/ENSMUSG00000032193/ENSMUSG00000016024/ENSMUSG00000052270/ENSMUSG00000024789/ENSMUSG00000027995/ENSMUSG00000028076/ENSMUSG00000024397/ENSMUSG00000031639/ENSMUSG00000025888/ENSMUSG00000044827/ENSMUSG00000001123/ENSMUSG00000031948/ENSMUSG00000079685	4	ENSMUSG00000015599/ENSMUSG00000047123/ENSMUSG00000044583/ENSMUSG00000029254
BP	GO:0050707	regulation of cytokine secretion	31|1102	190|14957	2.26578e-05	0.000726047	ENSMUSG00000078817/ENSMUSG00000036986/ENSMUSG00000042333/ENSMUSG00000038037/ENSMUSG00000036908/ENSMUSG00000029915/ENSMUSG00000035914/ENSMUSG00000022575/ENSMUSG00000032083/ENSMUSG00000031934/ENSMUSG00000027995/ENSMUSG00000016496/ENSMUSG00000028874/ENSMUSG00000051439/ENSMUSG00000031451/ENSMUSG00000040296/ENSMUSG00000027347/ENSMUSG00000070390/ENSMUSG00000030281/ENSMUSG00000024397/ENSMUSG00000025888/…	Nlrp12/Pml/Tnfrsf14/Socs1/Unc93b1/Clec5a/Cd276/Gsdmd/Apoa1/Panx1/Tlr2/Cd274/Fgr/Cd14/Gas6/Ddx58/Rasgrp1/Nlrp1b/Il17rc/Aif1/Casp1/Ubr5/Nod2/Tlr1/Hk1/Il1rap/Pycard/Lgals9/Kars/Cyp2j6/Tnfaip3	31	26	ENSMUSG00000036986/ENSMUSG00000042333/ENSMUSG00000038037/ENSMUSG00000036908/ENSMUSG00000029915/ENSMUSG00000035914/ENSMUSG00000022575/ENSMUSG00000031934/ENSMUSG00000027995/ENSMUSG00000016496/ENSMUSG00000028874/ENSMUSG00000051439/ENSMUSG00000031451/ENSMUSG00000040296/ENSMUSG00000027347/ENSMUSG00000070390/ENSMUSG00000030281/ENSMUSG00000024397/ENSMUSG00000025888/ENSMUSG00000055994/ENSMUSG00000044827/…	5	ENSMUSG00000078817/ENSMUSG00000032083/ENSMUSG00000037487/ENSMUSG00000022514/ENSMUSG00000052914
BP	GO:0044403	symbiont process	45|1102	322|14957	2.3668e-05	0.000753678	ENSMUSG00000020914/ENSMUSG00000046718/ENSMUSG00000069874/ENSMUSG00000068220/ENSMUSG00000025492/ENSMUSG00000036986/ENSMUSG00000042333/ENSMUSG00000057789/ENSMUSG00000037405/ENSMUSG00000027514/ENSMUSG00000028270/ENSMUSG00000052776/ENSMUSG00000104713/ENSMUSG00000026542/ENSMUSG00000026641/ENSMUSG00000032231/ENSMUSG00000025130/ENSMUSG00000009585/ENSMUSG00000026104/ENSMUSG00000046879/ENSMUSG00000028268/…	Top2a/Bst2/Irgm2/Lgals1/Ifitm3/Pml/Tnfrsf14/Bak1/Icam1/Zbp1/Gbp2/Oas1a/Gbp6/Apcs/Usf1/Anxa2/P4hb/Apobec3/Stat1/Irgm1/Gbp3/Oasl2/Prox1/Tlr2/Gbp7/Serpinb9/Gas6/Gbp9/Isg15/Eif3a/Ifitm2/Zc3hav1/Thoc2/Fuca2/Hsp90ab1/Ppib/Parp10/Plscr1/Ccl5/Oas3/Atg16l2/Pabpc1/Ddb1/F2/Chmp4b	45	37	ENSMUSG00000020914/ENSMUSG00000046718/ENSMUSG00000069874/ENSMUSG00000068220/ENSMUSG00000025492/ENSMUSG00000036986/ENSMUSG00000042333/ENSMUSG00000057789/ENSMUSG00000037405/ENSMUSG00000027514/ENSMUSG00000028270/ENSMUSG00000052776/ENSMUSG00000104713/ENSMUSG00000026542/ENSMUSG00000026641/ENSMUSG00000032231/ENSMUSG00000009585/ENSMUSG00000026104/ENSMUSG00000046879/ENSMUSG00000028268/ENSMUSG00000029561/…	8	ENSMUSG00000025130/ENSMUSG00000010175/ENSMUSG00000024991/ENSMUSG00000037475/ENSMUSG00000032383/ENSMUSG00000022283/ENSMUSG00000024740/ENSMUSG00000027249
BP	GO:0002699	positive regulation of immune effector process	34|1102	218|14957	2.46166e-05	0.000779017	ENSMUSG00000030895/ENSMUSG00000067235/ENSMUSG00000026072/ENSMUSG00000022181/ENSMUSG00000042333/ENSMUSG00000049103/ENSMUSG00000039217/ENSMUSG00000016024/ENSMUSG00000015947/ENSMUSG00000004043/ENSMUSG00000025314/ENSMUSG00000018899/ENSMUSG00000035385/ENSMUSG00000041471/ENSMUSG00000115338/ENSMUSG00000027995/ENSMUSG00000028874/ENSMUSG00000017830/ENSMUSG00000024990/ENSMUSG00000040296/ENSMUSG00000028076/…	Hpx/H2-Q10/Il1r1/C6/Tnfrsf14/Ccr2/Il18/Lbp/Fcgr1/Stat5a/Ptprj/Irf1/Ccl2/Shld2/Pnp/Tlr2/Fgr/Dhx58/Rbp4/Ddx58/Cd1d1/Sash3/Itgb2/Zc3hav1/Rasgrp1/Ticam1/Fcer1g/Rac2/Ddx60/Nod2/Hk1/Kars/Ulbp1/Malt1	34	29	ENSMUSG00000030895/ENSMUSG00000067235/ENSMUSG00000042333/ENSMUSG00000049103/ENSMUSG00000039217/ENSMUSG00000016024/ENSMUSG00000015947/ENSMUSG00000004043/ENSMUSG00000025314/ENSMUSG00000018899/ENSMUSG00000035385/ENSMUSG00000115338/ENSMUSG00000027995/ENSMUSG00000028874/ENSMUSG00000017830/ENSMUSG00000040296/ENSMUSG00000028076/ENSMUSG00000031101/ENSMUSG00000000290/ENSMUSG00000029826/ENSMUSG00000027347/…	5	ENSMUSG00000026072/ENSMUSG00000022181/ENSMUSG00000041471/ENSMUSG00000024990/ENSMUSG00000047123
BP	GO:0010896	regulation of triglyceride catabolic process	7|1102	14|14957	2.50336e-05	0.000782492	ENSMUSG00000030827/ENSMUSG00000032080/ENSMUSG00000032193/ENSMUSG00000032540/ENSMUSG00000021340/ENSMUSG00000011305/ENSMUSG00000032079	Fgf21/Apoa4/Ldlr/Abhd5/Gpld1/Plin5/Apoa5	7	1	ENSMUSG00000032193	6	ENSMUSG00000030827/ENSMUSG00000032080/ENSMUSG00000032540/ENSMUSG00000021340/ENSMUSG00000011305/ENSMUSG00000032079
BP	GO:0045351	type I interferon biosynthetic process	7|1102	14|14957	2.50336e-05	0.000782492	ENSMUSG00000025498/ENSMUSG00000002325/ENSMUSG00000047123/ENSMUSG00000032508/ENSMUSG00000031639/ENSMUSG00000044583/ENSMUSG00000020115	Irf7/Irf9/Ticam1/Myd88/Tlr3/Tlr7/Tbk1	7	5	ENSMUSG00000025498/ENSMUSG00000002325/ENSMUSG00000032508/ENSMUSG00000031639/ENSMUSG00000020115	2	ENSMUSG00000047123/ENSMUSG00000044583
BP	GO:0002548	monocyte chemotaxis	12|1102	41|14957	2.56315e-05	0.000796295	ENSMUSG00000049103/ENSMUSG00000037362/ENSMUSG00000035385/ENSMUSG00000052270/ENSMUSG00000034855/ENSMUSG00000053318/ENSMUSG00000023913/ENSMUSG00000024397/ENSMUSG00000050335/ENSMUSG00000035042/ENSMUSG00000025804/ENSMUSG00000030223	Ccr2/Nov/Ccl2/Fpr2/Cxcl10/Slamf8/Pla2g7/Aif1/Lgals3/Ccl5/Ccr1/Ptpro	12	11	ENSMUSG00000049103/ENSMUSG00000037362/ENSMUSG00000035385/ENSMUSG00000052270/ENSMUSG00000034855/ENSMUSG00000053318/ENSMUSG00000024397/ENSMUSG00000050335/ENSMUSG00000035042/ENSMUSG00000025804/ENSMUSG00000030223	1	ENSMUSG00000023913
BP	GO:0050706	regulation of interleukin-1 beta secretion	11|1102	35|14957	2.64952e-05	0.000818138	ENSMUSG00000036986/ENSMUSG00000022575/ENSMUSG00000032083/ENSMUSG00000031934/ENSMUSG00000027995/ENSMUSG00000070390/ENSMUSG00000025888/ENSMUSG00000055994/ENSMUSG00000037012/ENSMUSG00000030793/ENSMUSG00000019850	Pml/Gsdmd/Apoa1/Panx1/Tlr2/Nlrp1b/Casp1/Nod2/Hk1/Pycard/Tnfaip3	11	10	ENSMUSG00000036986/ENSMUSG00000022575/ENSMUSG00000031934/ENSMUSG00000027995/ENSMUSG00000070390/ENSMUSG00000025888/ENSMUSG00000055994/ENSMUSG00000037012/ENSMUSG00000030793/ENSMUSG00000019850	1	ENSMUSG00000032083
BP	GO:0006935	chemotaxis	60|1102	475|14957	2.67304e-05	0.000820431	ENSMUSG00000040026/ENSMUSG00000057465/ENSMUSG00000074115/ENSMUSG00000022425/ENSMUSG00000036585/ENSMUSG00000029417/ENSMUSG00000028039/ENSMUSG00000021948/ENSMUSG00000049103/ENSMUSG00000028064/ENSMUSG00000016024/ENSMUSG00000021451/ENSMUSG00000032083/ENSMUSG00000037362/ENSMUSG00000029032/ENSMUSG00000023088/ENSMUSG00000025314/ENSMUSG00000035385/ENSMUSG00000052270/ENSMUSG00000026271/ENSMUSG00000031451/…	Saa3/Saa2/Saa1/Enpp2/Fgf1/Cxcl9/Efna3/Prkcd/Ccr2/Sema4a/Lbp/Sema4d/Apoa1/Nov/Arhgef16/Abcc1/Ptprj/Ccl2/Fpr2/Gpr35/Gas6/S100a9/Hspb1/Cyfip2/Cxcl10/Gpr18/Hmgb2/Slamf8/Flot1/Slc37a4/Pla2g7/Itgb2/Il17rc/Coro1a/Aif1/Lgals3/Fcer1g/Rac2/Dpysl2/Csf3r/Nod2/Cyp7b1/Ccl5/Lgals9/Kars/Arhgef5/Ccr1/Bst1/Slit1/Ecscr/Ptpro/Il1rn/Cxadr/Dock2/Stap1/Camk1d/Slc8b1/Rhog/Tubb3/Ackr2	60	52	ENSMUSG00000040026/ENSMUSG00000057465/ENSMUSG00000074115/ENSMUSG00000029417/ENSMUSG00000028039/ENSMUSG00000021948/ENSMUSG00000049103/ENSMUSG00000028064/ENSMUSG00000016024/ENSMUSG00000021451/ENSMUSG00000037362/ENSMUSG00000029032/ENSMUSG00000023088/ENSMUSG00000025314/ENSMUSG00000035385/ENSMUSG00000052270/ENSMUSG00000026271/ENSMUSG00000031451/ENSMUSG00000056071/ENSMUSG00000004951/ENSMUSG00000020340/…	8	ENSMUSG00000022425/ENSMUSG00000036585/ENSMUSG00000032083/ENSMUSG00000032114/ENSMUSG00000023913/ENSMUSG00000039519/ENSMUSG00000025020/ENSMUSG00000029254
BP	GO:0042330	taxis	60|1102	478|14957	3.22268e-05	0.000983206	ENSMUSG00000040026/ENSMUSG00000057465/ENSMUSG00000074115/ENSMUSG00000022425/ENSMUSG00000036585/ENSMUSG00000029417/ENSMUSG00000028039/ENSMUSG00000021948/ENSMUSG00000049103/ENSMUSG00000028064/ENSMUSG00000016024/ENSMUSG00000021451/ENSMUSG00000032083/ENSMUSG00000037362/ENSMUSG00000029032/ENSMUSG00000023088/ENSMUSG00000025314/ENSMUSG00000035385/ENSMUSG00000052270/ENSMUSG00000026271/ENSMUSG00000031451/…	Saa3/Saa2/Saa1/Enpp2/Fgf1/Cxcl9/Efna3/Prkcd/Ccr2/Sema4a/Lbp/Sema4d/Apoa1/Nov/Arhgef16/Abcc1/Ptprj/Ccl2/Fpr2/Gpr35/Gas6/S100a9/Hspb1/Cyfip2/Cxcl10/Gpr18/Hmgb2/Slamf8/Flot1/Slc37a4/Pla2g7/Itgb2/Il17rc/Coro1a/Aif1/Lgals3/Fcer1g/Rac2/Dpysl2/Csf3r/Nod2/Cyp7b1/Ccl5/Lgals9/Kars/Arhgef5/Ccr1/Bst1/Slit1/Ecscr/Ptpro/Il1rn/Cxadr/Dock2/Stap1/Camk1d/Slc8b1/Rhog/Tubb3/Ackr2	60	52	ENSMUSG00000040026/ENSMUSG00000057465/ENSMUSG00000074115/ENSMUSG00000029417/ENSMUSG00000028039/ENSMUSG00000021948/ENSMUSG00000049103/ENSMUSG00000028064/ENSMUSG00000016024/ENSMUSG00000021451/ENSMUSG00000037362/ENSMUSG00000029032/ENSMUSG00000023088/ENSMUSG00000025314/ENSMUSG00000035385/ENSMUSG00000052270/ENSMUSG00000026271/ENSMUSG00000031451/ENSMUSG00000056071/ENSMUSG00000004951/ENSMUSG00000020340/…	8	ENSMUSG00000022425/ENSMUSG00000036585/ENSMUSG00000032083/ENSMUSG00000032114/ENSMUSG00000023913/ENSMUSG00000039519/ENSMUSG00000025020/ENSMUSG00000029254
BP	GO:0050777	negative regulation of immune response	25|1102	141|14957	3.35186e-05	0.00101392	ENSMUSG00000074151/ENSMUSG00000022126/ENSMUSG00000042726/ENSMUSG00000042333/ENSMUSG00000026043/ENSMUSG00000049103/ENSMUSG00000034422/ENSMUSG00000023249/ENSMUSG00000039384/ENSMUSG00000032083/ENSMUSG00000018899/ENSMUSG00000051457/ENSMUSG00000037321/ENSMUSG00000045827/ENSMUSG00000030157/ENSMUSG00000017830/ENSMUSG00000031805/ENSMUSG00000053318/ENSMUSG00000050335/ENSMUSG00000055994/ENSMUSG00000044206/…	Nlrc5/Acod1/Trafd1/Tnfrsf14/Col3a1/Ccr2/Parp14/Parp3/Dusp10/Apoa1/Irf1/Spn/Tap1/Serpinb9/Clec2d/Dhx58/Jak3/Slamf8/Lgals3/Nod2/Vsig4/Lgals9/Ccr1/Tnfaip3/Psma1	25	23	ENSMUSG00000074151/ENSMUSG00000022126/ENSMUSG00000042726/ENSMUSG00000042333/ENSMUSG00000026043/ENSMUSG00000049103/ENSMUSG00000034422/ENSMUSG00000023249/ENSMUSG00000039384/ENSMUSG00000018899/ENSMUSG00000051457/ENSMUSG00000037321/ENSMUSG00000045827/ENSMUSG00000030157/ENSMUSG00000017830/ENSMUSG00000031805/ENSMUSG00000053318/ENSMUSG00000050335/ENSMUSG00000055994/ENSMUSG00000001123/ENSMUSG00000025804/…	2	ENSMUSG00000032083/ENSMUSG00000044206
BP	GO:0019882	antigen processing and presentation	19|1102	92|14957	3.36316e-05	0.00101392	ENSMUSG00000067235/ENSMUSG00000079197/ENSMUSG00000022216/ENSMUSG00000037405/ENSMUSG00000036908/ENSMUSG00000015947/ENSMUSG00000038213/ENSMUSG00000002983/ENSMUSG00000037321/ENSMUSG00000028076/ENSMUSG00000096727/ENSMUSG00000024308/ENSMUSG00000058715/ENSMUSG00000055994/ENSMUSG00000024338/ENSMUSG00000030793/ENSMUSG00000021583/ENSMUSG00000060586/ENSMUSG00000037649	H2-Q10/Psme2/Psme1/Icam1/Unc93b1/Fcgr1/Tapbpl/Relb/Tap1/Cd1d1/Psmb9/Tapbp/Fcer1g/Nod2/Psmb8/Pycard/Erap1/H2-Eb1/H2-DMa	19	19	ENSMUSG00000067235/ENSMUSG00000079197/ENSMUSG00000022216/ENSMUSG00000037405/ENSMUSG00000036908/ENSMUSG00000015947/ENSMUSG00000038213/ENSMUSG00000002983/ENSMUSG00000037321/ENSMUSG00000028076/ENSMUSG00000096727/ENSMUSG00000024308/ENSMUSG00000058715/ENSMUSG00000055994/ENSMUSG00000024338/ENSMUSG00000030793/ENSMUSG00000021583/ENSMUSG00000060586/ENSMUSG00000037649	0
BP	GO:0071466	cellular response to xenobiotic stimulus	24|1102	133|14957	3.55653e-05	0.00106591	ENSMUSG00000003053/ENSMUSG00000042248/ENSMUSG00000060613/ENSMUSG00000035836/ENSMUSG00000058135/ENSMUSG00000062624/ENSMUSG00000058216/ENSMUSG00000068762/ENSMUSG00000025934/ENSMUSG00000027490/ENSMUSG00000004043/ENSMUSG00000060407/ENSMUSG00000024789/ENSMUSG00000054827/ENSMUSG00000018796/ENSMUSG00000057933/ENSMUSG00000025002/ENSMUSG00000030483/ENSMUSG00000074882/ENSMUSG00000030670/ENSMUSG00000038155/…	Cyp2c29/Cyp2c37/Cyp2c70/Ugt2b1/Gstm1/Cyp2c67/Gstp3/Gstm6/Gsta3/E2f1/Stat5a/Cyp2a12/Jak2/Cyp2c50/Acsl1/Gsta2/Cyp2c55/Cyp2b10/Cyp2c68/Cyp2r1/Gstp2/Gstm4/Slc8a1/Cyp2j6	24	16	ENSMUSG00000003053/ENSMUSG00000042248/ENSMUSG00000058135/ENSMUSG00000068762/ENSMUSG00000025934/ENSMUSG00000027490/ENSMUSG00000004043/ENSMUSG00000024789/ENSMUSG00000054827/ENSMUSG00000057933/ENSMUSG00000025002/ENSMUSG00000030483/ENSMUSG00000030670/ENSMUSG00000038155/ENSMUSG00000027890/ENSMUSG00000054640	8	ENSMUSG00000060613/ENSMUSG00000035836/ENSMUSG00000062624/ENSMUSG00000058216/ENSMUSG00000060407/ENSMUSG00000018796/ENSMUSG00000074882/ENSMUSG00000052914
BP	GO:0015711	organic anion transport	46|1102	338|14957	3.7822e-05	0.00112692	ENSMUSG00000019935/ENSMUSG00000055254/ENSMUSG00000074345/ENSMUSG00000017754/ENSMUSG00000079263/ENSMUSG00000023073/ENSMUSG00000020826/ENSMUSG00000021948/ENSMUSG00000032080/ENSMUSG00000032193/ENSMUSG00000032883/ENSMUSG00000024851/ENSMUSG00000032083/ENSMUSG00000023088/ENSMUSG00000020873/ENSMUSG00000030774/ENSMUSG00000021135/ENSMUSG00000031378/ENSMUSG00000030762/ENSMUSG00000018796/ENSMUSG00000015243/…	Slc17a8/Ntrk2/Tnfaip8l3/Pltp/Gm6614/Slc10a2/Nos2/Prkcd/Apoa4/Ldlr/Acsl3/Pitpnm1/Apoa1/Abcc1/Slc35b1/Pak1/Slc10a1/Abcd1/Aqp8/Acsl1/Abca1/Scp2/Slc25a1/Rbp4/Slco3a1/Slc37a4/Atp9a/Slc2a1/Adora1/Eprs/Slc22a7/Slc22a30/Slco2a1/Slc19a1/Slc2a2/Dpysl2/Mttp/Abcc3/Slc13a3/Adora2a/Apoa5/Slc1a5/Il1rn/Slc27a2/Slco1b2/Slc16a3	46	23	ENSMUSG00000074345/ENSMUSG00000023073/ENSMUSG00000020826/ENSMUSG00000021948/ENSMUSG00000032193/ENSMUSG00000032883/ENSMUSG00000024851/ENSMUSG00000023088/ENSMUSG00000030774/ENSMUSG00000031378/ENSMUSG00000030762/ENSMUSG00000003528/ENSMUSG00000025790/ENSMUSG00000028645/ENSMUSG00000042429/ENSMUSG00000032548/ENSMUSG00000022048/ENSMUSG00000020865/ENSMUSG00000018459/ENSMUSG00000020178/ENSMUSG00000001918/…	23	ENSMUSG00000019935/ENSMUSG00000055254/ENSMUSG00000017754/ENSMUSG00000079263/ENSMUSG00000032080/ENSMUSG00000032083/ENSMUSG00000020873/ENSMUSG00000021135/ENSMUSG00000018796/ENSMUSG00000015243/ENSMUSG00000028603/ENSMUSG00000024990/ENSMUSG00000032114/ENSMUSG00000027546/ENSMUSG00000026615/ENSMUSG00000067144/ENSMUSG00000052562/ENSMUSG00000001436/ENSMUSG00000027690/ENSMUSG00000028158/ENSMUSG00000032079/…
BP	GO:0050671	positive regulation of lymphocyte proliferation	22|1102	117|14957	3.87953e-05	0.0011492	ENSMUSG00000049103/ENSMUSG00000039217/ENSMUSG00000035914/ENSMUSG00000004043/ENSMUSG00000039323/ENSMUSG00000051457/ENSMUSG00000115338/ENSMUSG00000016496/ENSMUSG00000028076/ENSMUSG00000031805/ENSMUSG00000040329/ENSMUSG00000031101/ENSMUSG00000020053/ENSMUSG00000047123/ENSMUSG00000000732/ENSMUSG00000030707/ENSMUSG00000032508/ENSMUSG00000024397/ENSMUSG00000031497/ENSMUSG00000035042/ENSMUSG00000030793/…	Ccr2/Il18/Cd276/Stat5a/Igfbp2/Spn/Pnp/Cd274/Cd1d1/Jak3/Il7/Sash3/Igf1/Ticam1/Icosl/Coro1a/Myd88/Aif1/Tnfsf13b/Ccl5/Pycard/Bst1	22	19	ENSMUSG00000049103/ENSMUSG00000039217/ENSMUSG00000035914/ENSMUSG00000004043/ENSMUSG00000051457/ENSMUSG00000115338/ENSMUSG00000016496/ENSMUSG00000028076/ENSMUSG00000031805/ENSMUSG00000040329/ENSMUSG00000031101/ENSMUSG00000000732/ENSMUSG00000030707/ENSMUSG00000032508/ENSMUSG00000024397/ENSMUSG00000031497/ENSMUSG00000035042/ENSMUSG00000030793/ENSMUSG00000029082	3	ENSMUSG00000039323/ENSMUSG00000020053/ENSMUSG00000047123
BP	GO:0097006	regulation of plasma lipoprotein particle levels	14|1102	56|14957	3.96022e-05	0.00116632	ENSMUSG00000017754/ENSMUSG00000025044/ENSMUSG00000032080/ENSMUSG00000032193/ENSMUSG00000044254/ENSMUSG00000032883/ENSMUSG00000032231/ENSMUSG00000057074/ENSMUSG00000032083/ENSMUSG00000015243/ENSMUSG00000023913/ENSMUSG00000021340/ENSMUSG00000028158/ENSMUSG00000032079	Pltp/Msr1/Apoa4/Ldlr/Pcsk9/Acsl3/Anxa2/Ces1g/Apoa1/Abca1/Pla2g7/Gpld1/Mttp/Apoa5	14	6	ENSMUSG00000025044/ENSMUSG00000032193/ENSMUSG00000044254/ENSMUSG00000032883/ENSMUSG00000032231/ENSMUSG00000057074	8	ENSMUSG00000017754/ENSMUSG00000032080/ENSMUSG00000032083/ENSMUSG00000015243/ENSMUSG00000023913/ENSMUSG00000021340/ENSMUSG00000028158/ENSMUSG00000032079
BP	GO:0071621	granulocyte chemotaxis	20|1102	101|14957	3.9973e-05	0.00117047	ENSMUSG00000029417/ENSMUSG00000016024/ENSMUSG00000025314/ENSMUSG00000035385/ENSMUSG00000056071/ENSMUSG00000034855/ENSMUSG00000032114/ENSMUSG00000000290/ENSMUSG00000030281/ENSMUSG00000050335/ENSMUSG00000058715/ENSMUSG00000033220/ENSMUSG00000028859/ENSMUSG00000055994/ENSMUSG00000035042/ENSMUSG00000031948/ENSMUSG00000029082/ENSMUSG00000026981/ENSMUSG00000022865/ENSMUSG00000039145	Cxcl9/Lbp/Ptprj/Ccl2/S100a9/Cxcl10/Slc37a4/Itgb2/Il17rc/Lgals3/Fcer1g/Rac2/Csf3r/Nod2/Ccl5/Kars/Bst1/Il1rn/Cxadr/Camk1d	20	19	ENSMUSG00000029417/ENSMUSG00000016024/ENSMUSG00000025314/ENSMUSG00000035385/ENSMUSG00000056071/ENSMUSG00000034855/ENSMUSG00000000290/ENSMUSG00000030281/ENSMUSG00000050335/ENSMUSG00000058715/ENSMUSG00000033220/ENSMUSG00000028859/ENSMUSG00000055994/ENSMUSG00000035042/ENSMUSG00000031948/ENSMUSG00000029082/ENSMUSG00000026981/ENSMUSG00000022865/ENSMUSG00000039145	1	ENSMUSG00000032114
BP	GO:0050715	positive regulation of cytokine secretion	24|1102	134|14957	4.03564e-05	0.00117495	ENSMUSG00000042333/ENSMUSG00000036908/ENSMUSG00000029915/ENSMUSG00000035914/ENSMUSG00000022575/ENSMUSG00000031934/ENSMUSG00000027995/ENSMUSG00000016496/ENSMUSG00000028874/ENSMUSG00000051439/ENSMUSG00000040296/ENSMUSG00000027347/ENSMUSG00000070390/ENSMUSG00000030281/ENSMUSG00000024397/ENSMUSG00000025888/ENSMUSG00000055994/ENSMUSG00000044827/ENSMUSG00000037012/ENSMUSG00000022514/ENSMUSG00000030793/…	Tnfrsf14/Unc93b1/Clec5a/Cd276/Gsdmd/Panx1/Tlr2/Cd274/Fgr/Cd14/Ddx58/Rasgrp1/Nlrp1b/Il17rc/Aif1/Casp1/Nod2/Tlr1/Hk1/Il1rap/Pycard/Lgals9/Kars/Cyp2j6	24	22	ENSMUSG00000042333/ENSMUSG00000036908/ENSMUSG00000029915/ENSMUSG00000035914/ENSMUSG00000022575/ENSMUSG00000031934/ENSMUSG00000027995/ENSMUSG00000016496/ENSMUSG00000028874/ENSMUSG00000051439/ENSMUSG00000040296/ENSMUSG00000027347/ENSMUSG00000070390/ENSMUSG00000030281/ENSMUSG00000024397/ENSMUSG00000025888/ENSMUSG00000055994/ENSMUSG00000044827/ENSMUSG00000037012/ENSMUSG00000030793/ENSMUSG00000001123/…	2	ENSMUSG00000022514/ENSMUSG00000052914
BP	GO:0019433	triglyceride catabolic process	9|1102	25|14957	4.29162e-05	0.00124237	ENSMUSG00000030827/ENSMUSG00000032080/ENSMUSG00000032193/ENSMUSG00000003123/ENSMUSG00000032083/ENSMUSG00000032540/ENSMUSG00000021340/ENSMUSG00000011305/ENSMUSG00000032079	Fgf21/Apoa4/Ldlr/Lipe/Apoa1/Abhd5/Gpld1/Plin5/Apoa5	9	2	ENSMUSG00000032193/ENSMUSG00000003123	7	ENSMUSG00000030827/ENSMUSG00000032080/ENSMUSG00000032083/ENSMUSG00000032540/ENSMUSG00000021340/ENSMUSG00000011305/ENSMUSG00000032079
BP	GO:0006614	SRP-dependent cotranslational protein targeting to membrane	7|1102	15|14957	4.39523e-05	0.00126518	ENSMUSG00000030082/ENSMUSG00000020780/ENSMUSG00000036323/ENSMUSG00000019802/ENSMUSG00000032042/ENSMUSG00000027828/ENSMUSG00000025935	Sec61a1/Srp68/Srp72/Sec63/Srpr/Ssr3/Tram1	7	0		7	ENSMUSG00000030082/ENSMUSG00000020780/ENSMUSG00000036323/ENSMUSG00000019802/ENSMUSG00000032042/ENSMUSG00000027828/ENSMUSG00000025935
BP	GO:0045071	negative regulation of viral genome replication	13|1102	50|14957	4.7682e-05	0.00134958	ENSMUSG00000046718/ENSMUSG00000025492/ENSMUSG00000052776/ENSMUSG00000009585/ENSMUSG00000029561/ENSMUSG00000010175/ENSMUSG00000035692/ENSMUSG00000060591/ENSMUSG00000029826/ENSMUSG00000063268/ENSMUSG00000032369/ENSMUSG00000035042/ENSMUSG00000032661	Bst2/Ifitm3/Oas1a/Apobec3/Oasl2/Prox1/Isg15/Ifitm2/Zc3hav1/Parp10/Plscr1/Ccl5/Oas3	13	12	ENSMUSG00000046718/ENSMUSG00000025492/ENSMUSG00000052776/ENSMUSG00000009585/ENSMUSG00000029561/ENSMUSG00000035692/ENSMUSG00000060591/ENSMUSG00000029826/ENSMUSG00000063268/ENSMUSG00000032369/ENSMUSG00000035042/ENSMUSG00000032661	1	ENSMUSG00000010175
BP	GO:2000107	negative regulation of leukocyte apoptotic process	13|1102	50|14957	4.7682e-05	0.00134958	ENSMUSG00000039217/ENSMUSG00000004043/ENSMUSG00000022831/ENSMUSG00000115338/ENSMUSG00000045827/ENSMUSG00000031451/ENSMUSG00000031805/ENSMUSG00000020897/ENSMUSG00000102037/ENSMUSG00000028191/ENSMUSG00000058715/ENSMUSG00000055994/ENSMUSG00000035042	Il18/Stat5a/Hcls1/Pnp/Serpinb9/Gas6/Jak3/Aurkb/Bcl2a1a/Bcl10/Fcer1g/Nod2/Ccl5	13	13	ENSMUSG00000039217/ENSMUSG00000004043/ENSMUSG00000022831/ENSMUSG00000115338/ENSMUSG00000045827/ENSMUSG00000031451/ENSMUSG00000031805/ENSMUSG00000020897/ENSMUSG00000102037/ENSMUSG00000028191/ENSMUSG00000058715/ENSMUSG00000055994/ENSMUSG00000035042	0
BP	GO:0002366	leukocyte activation involved in immune response	34|1102	225|14957	4.77487e-05	0.00134958	ENSMUSG00000068220/ENSMUSG00000049103/ENSMUSG00000037405/ENSMUSG00000021624/ENSMUSG00000039217/ENSMUSG00000023249/ENSMUSG00000028064/ENSMUSG00000016024/ENSMUSG00000002983/ENSMUSG00000018899/ENSMUSG00000051457/ENSMUSG00000053175/ENSMUSG00000041471/ENSMUSG00000028874/ENSMUSG00000031805/ENSMUSG00000024300/ENSMUSG00000000290/ENSMUSG00000027347/ENSMUSG00000047123/ENSMUSG00000000732/ENSMUSG00000030707/…	Lgals1/Ccr2/Icam1/Cd180/Il18/Parp3/Sema4a/Lbp/Relb/Irf1/Spn/Bcl3/Shld2/Fgr/Jak3/Myo1f/Itgb2/Rasgrp1/Ticam1/Icosl/Coro1a/Lgals3/Plcg2/Fcer1g/Rac2/Stat3/Lcp1/Il27/Pycard/Lgals9/Kars/Dock2/Tnfaip3/Malt1	34	32	ENSMUSG00000068220/ENSMUSG00000049103/ENSMUSG00000037405/ENSMUSG00000021624/ENSMUSG00000039217/ENSMUSG00000023249/ENSMUSG00000028064/ENSMUSG00000016024/ENSMUSG00000002983/ENSMUSG00000018899/ENSMUSG00000051457/ENSMUSG00000053175/ENSMUSG00000028874/ENSMUSG00000031805/ENSMUSG00000024300/ENSMUSG00000000290/ENSMUSG00000027347/ENSMUSG00000000732/ENSMUSG00000030707/ENSMUSG00000050335/ENSMUSG00000034330/…	2	ENSMUSG00000041471/ENSMUSG00000047123
BP	GO:0019884	antigen processing and presentation of exogenous antigen	10|1102	31|14957	4.7944e-05	0.00134958	ENSMUSG00000079197/ENSMUSG00000022216/ENSMUSG00000036908/ENSMUSG00000015947/ENSMUSG00000037321/ENSMUSG00000028076/ENSMUSG00000024308/ENSMUSG00000058715/ENSMUSG00000060586/ENSMUSG00000037649	Psme2/Psme1/Unc93b1/Fcgr1/Tap1/Cd1d1/Tapbp/Fcer1g/H2-Eb1/H2-DMa	10	10	ENSMUSG00000079197/ENSMUSG00000022216/ENSMUSG00000036908/ENSMUSG00000015947/ENSMUSG00000037321/ENSMUSG00000028076/ENSMUSG00000024308/ENSMUSG00000058715/ENSMUSG00000060586/ENSMUSG00000037649	0
BP	GO:0032946	positive regulation of mononuclear cell proliferation	22|1102	119|14957	5.07811e-05	0.00142159	ENSMUSG00000049103/ENSMUSG00000039217/ENSMUSG00000035914/ENSMUSG00000004043/ENSMUSG00000039323/ENSMUSG00000051457/ENSMUSG00000115338/ENSMUSG00000016496/ENSMUSG00000028076/ENSMUSG00000031805/ENSMUSG00000040329/ENSMUSG00000031101/ENSMUSG00000020053/ENSMUSG00000047123/ENSMUSG00000000732/ENSMUSG00000030707/ENSMUSG00000032508/ENSMUSG00000024397/ENSMUSG00000031497/ENSMUSG00000035042/ENSMUSG00000030793/…	Ccr2/Il18/Cd276/Stat5a/Igfbp2/Spn/Pnp/Cd274/Cd1d1/Jak3/Il7/Sash3/Igf1/Ticam1/Icosl/Coro1a/Myd88/Aif1/Tnfsf13b/Ccl5/Pycard/Bst1	22	19	ENSMUSG00000049103/ENSMUSG00000039217/ENSMUSG00000035914/ENSMUSG00000004043/ENSMUSG00000051457/ENSMUSG00000115338/ENSMUSG00000016496/ENSMUSG00000028076/ENSMUSG00000031805/ENSMUSG00000040329/ENSMUSG00000031101/ENSMUSG00000000732/ENSMUSG00000030707/ENSMUSG00000032508/ENSMUSG00000024397/ENSMUSG00000031497/ENSMUSG00000035042/ENSMUSG00000030793/ENSMUSG00000029082	3	ENSMUSG00000039323/ENSMUSG00000020053/ENSMUSG00000047123
BP	GO:0032755	positive regulation of interleukin-6 production	18|1102	87|14957	5.24004e-05	0.00145891	ENSMUSG00000036908/ENSMUSG00000016024/ENSMUSG00000027995/ENSMUSG00000040296/ENSMUSG00000030281/ENSMUSG00000047123/ENSMUSG00000032508/ENSMUSG00000024397/ENSMUSG00000031639/ENSMUSG00000058715/ENSMUSG00000055994/ENSMUSG00000004040/ENSMUSG00000044827/ENSMUSG00000022514/ENSMUSG00000030793/ENSMUSG00000001123/ENSMUSG00000044583/ENSMUSG00000026981	Unc93b1/Lbp/Tlr2/Ddx58/Il17rc/Ticam1/Myd88/Aif1/Tlr3/Fcer1g/Nod2/Stat3/Tlr1/Il1rap/Pycard/Lgals9/Tlr7/Il1rn	18	15	ENSMUSG00000036908/ENSMUSG00000016024/ENSMUSG00000027995/ENSMUSG00000040296/ENSMUSG00000030281/ENSMUSG00000032508/ENSMUSG00000024397/ENSMUSG00000031639/ENSMUSG00000058715/ENSMUSG00000055994/ENSMUSG00000004040/ENSMUSG00000044827/ENSMUSG00000030793/ENSMUSG00000001123/ENSMUSG00000026981	3	ENSMUSG00000047123/ENSMUSG00000022514/ENSMUSG00000044583
BP	GO:0030299	intestinal cholesterol absorption	6|1102	11|14957	5.28028e-05	0.00146212	ENSMUSG00000032080/ENSMUSG00000032193/ENSMUSG00000032083/ENSMUSG00000023022/ENSMUSG00000032079/ENSMUSG00000023832	Apoa4/Ldlr/Apoa1/Lima1/Apoa5/Acat2	6	3	ENSMUSG00000032193/ENSMUSG00000023022/ENSMUSG00000023832	3	ENSMUSG00000032080/ENSMUSG00000032083/ENSMUSG00000032079
BP	GO:0002793	positive regulation of peptide secretion	40|1102	284|14957	5.53856e-05	0.00151713	ENSMUSG00000027808/ENSMUSG00000042333/ENSMUSG00000036908/ENSMUSG00000029915/ENSMUSG00000020122/ENSMUSG00000035914/ENSMUSG00000022575/ENSMUSG00000031934/ENSMUSG00000024789/ENSMUSG00000049044/ENSMUSG00000027995/ENSMUSG00000016496/ENSMUSG00000028874/ENSMUSG00000051439/ENSMUSG00000024990/ENSMUSG00000056071/ENSMUSG00000040296/ENSMUSG00000061665/ENSMUSG00000027347/ENSMUSG00000020053/ENSMUSG00000070390/…	Serp1/Tnfrsf14/Unc93b1/Clec5a/Egfr/Cd276/Gsdmd/Panx1/Jak2/Rapgef4/Tlr2/Cd274/Fgr/Cd14/Rbp4/S100a9/Ddx58/Cd2ap/Rasgrp1/Igf1/Nlrp1b/Il17rc/Adora1/Aif1/Gpld1/Casp1/Oxct1/Nod2/Tlr1/Hk1/Il1rap/Pycard/Lgals9/Kars/Adora2a/Sec24a/Hcar2/Cyp2j6/Gck/C2cd2l	40	29	ENSMUSG00000042333/ENSMUSG00000036908/ENSMUSG00000029915/ENSMUSG00000035914/ENSMUSG00000022575/ENSMUSG00000031934/ENSMUSG00000024789/ENSMUSG00000027995/ENSMUSG00000016496/ENSMUSG00000028874/ENSMUSG00000051439/ENSMUSG00000056071/ENSMUSG00000040296/ENSMUSG00000061665/ENSMUSG00000027347/ENSMUSG00000070390/ENSMUSG00000030281/ENSMUSG00000042429/ENSMUSG00000024397/ENSMUSG00000025888/ENSMUSG00000022186/…	11	ENSMUSG00000027808/ENSMUSG00000020122/ENSMUSG00000049044/ENSMUSG00000024990/ENSMUSG00000020053/ENSMUSG00000021340/ENSMUSG00000022514/ENSMUSG00000036391/ENSMUSG00000052914/ENSMUSG00000041798/ENSMUSG00000032120
BP	GO:0001774	microglial cell activation	12|1102	44|14957	5.56826e-05	0.00151713	ENSMUSG00000030560/ENSMUSG00000032193/ENSMUSG00000052270/ENSMUSG00000024789/ENSMUSG00000027995/ENSMUSG00000015599/ENSMUSG00000024397/ENSMUSG00000031639/ENSMUSG00000025888/ENSMUSG00000044827/ENSMUSG00000044583/ENSMUSG00000029254	Ctsc/Ldlr/Fpr2/Jak2/Tlr2/Ttbk1/Aif1/Tlr3/Casp1/Tlr1/Tlr7/Stap1	12	9	ENSMUSG00000030560/ENSMUSG00000032193/ENSMUSG00000052270/ENSMUSG00000024789/ENSMUSG00000027995/ENSMUSG00000024397/ENSMUSG00000031639/ENSMUSG00000025888/ENSMUSG00000044827	3	ENSMUSG00000015599/ENSMUSG00000044583/ENSMUSG00000029254
BP	GO:0002269	leukocyte activation involved in inflammatory response	12|1102	44|14957	5.56826e-05	0.00151713	ENSMUSG00000030560/ENSMUSG00000032193/ENSMUSG00000052270/ENSMUSG00000024789/ENSMUSG00000027995/ENSMUSG00000015599/ENSMUSG00000024397/ENSMUSG00000031639/ENSMUSG00000025888/ENSMUSG00000044827/ENSMUSG00000044583/ENSMUSG00000029254	Ctsc/Ldlr/Fpr2/Jak2/Tlr2/Ttbk1/Aif1/Tlr3/Casp1/Tlr1/Tlr7/Stap1	12	9	ENSMUSG00000030560/ENSMUSG00000032193/ENSMUSG00000052270/ENSMUSG00000024789/ENSMUSG00000027995/ENSMUSG00000024397/ENSMUSG00000031639/ENSMUSG00000025888/ENSMUSG00000044827	3	ENSMUSG00000015599/ENSMUSG00000044583/ENSMUSG00000029254
BP	GO:0050714	positive regulation of protein secretion	38|1102	265|14957	5.70194e-05	0.00154529	ENSMUSG00000027808/ENSMUSG00000042333/ENSMUSG00000036908/ENSMUSG00000029915/ENSMUSG00000020122/ENSMUSG00000035914/ENSMUSG00000022575/ENSMUSG00000031934/ENSMUSG00000024789/ENSMUSG00000049044/ENSMUSG00000027995/ENSMUSG00000016496/ENSMUSG00000028874/ENSMUSG00000051439/ENSMUSG00000024990/ENSMUSG00000040296/ENSMUSG00000061665/ENSMUSG00000027347/ENSMUSG00000020053/ENSMUSG00000070390/ENSMUSG00000030281/…	Serp1/Tnfrsf14/Unc93b1/Clec5a/Egfr/Cd276/Gsdmd/Panx1/Jak2/Rapgef4/Tlr2/Cd274/Fgr/Cd14/Rbp4/Ddx58/Cd2ap/Rasgrp1/Igf1/Nlrp1b/Il17rc/Aif1/Gpld1/Casp1/Oxct1/Nod2/Tlr1/Hk1/Il1rap/Pycard/Lgals9/Kars/Adora2a/Sec24a/Hcar2/Cyp2j6/Gck/C2cd2l	38	27	ENSMUSG00000042333/ENSMUSG00000036908/ENSMUSG00000029915/ENSMUSG00000035914/ENSMUSG00000022575/ENSMUSG00000031934/ENSMUSG00000024789/ENSMUSG00000027995/ENSMUSG00000016496/ENSMUSG00000028874/ENSMUSG00000051439/ENSMUSG00000040296/ENSMUSG00000061665/ENSMUSG00000027347/ENSMUSG00000070390/ENSMUSG00000030281/ENSMUSG00000024397/ENSMUSG00000025888/ENSMUSG00000022186/ENSMUSG00000055994/ENSMUSG00000044827/…	11	ENSMUSG00000027808/ENSMUSG00000020122/ENSMUSG00000049044/ENSMUSG00000024990/ENSMUSG00000020053/ENSMUSG00000021340/ENSMUSG00000022514/ENSMUSG00000036391/ENSMUSG00000052914/ENSMUSG00000041798/ENSMUSG00000032120
BP	GO:0030593	neutrophil chemotaxis	17|1102	80|14957	5.88657e-05	0.00158688	ENSMUSG00000029417/ENSMUSG00000016024/ENSMUSG00000035385/ENSMUSG00000056071/ENSMUSG00000034855/ENSMUSG00000032114/ENSMUSG00000000290/ENSMUSG00000050335/ENSMUSG00000058715/ENSMUSG00000033220/ENSMUSG00000028859/ENSMUSG00000055994/ENSMUSG00000035042/ENSMUSG00000029082/ENSMUSG00000026981/ENSMUSG00000022865/ENSMUSG00000039145	Cxcl9/Lbp/Ccl2/S100a9/Cxcl10/Slc37a4/Itgb2/Lgals3/Fcer1g/Rac2/Csf3r/Nod2/Ccl5/Bst1/Il1rn/Cxadr/Camk1d	17	16	ENSMUSG00000029417/ENSMUSG00000016024/ENSMUSG00000035385/ENSMUSG00000056071/ENSMUSG00000034855/ENSMUSG00000000290/ENSMUSG00000050335/ENSMUSG00000058715/ENSMUSG00000033220/ENSMUSG00000028859/ENSMUSG00000055994/ENSMUSG00000035042/ENSMUSG00000029082/ENSMUSG00000026981/ENSMUSG00000022865/ENSMUSG00000039145	1	ENSMUSG00000032114
BP	GO:0002757	immune response-activating signal transduction	40|1102	285|14957	5.99658e-05	0.00159961	ENSMUSG00000046688/ENSMUSG00000025498/ENSMUSG00000069874/ENSMUSG00000022126/ENSMUSG00000036908/ENSMUSG00000016024/ENSMUSG00000035914/ENSMUSG00000025314/ENSMUSG00000018899/ENSMUSG00000051457/ENSMUSG00000052270/ENSMUSG00000027995/ENSMUSG00000017830/ENSMUSG00000051439/ENSMUSG00000040296/ENSMUSG00000040283/ENSMUSG00000059714/ENSMUSG00000055447/ENSMUSG00000029826/ENSMUSG00000028191/ENSMUSG00000047123/…	Tifa/Irf7/Irgm2/Acod1/Unc93b1/Lbp/Cd276/Ptprj/Irf1/Spn/Fpr2/Tlr2/Dhx58/Cd14/Ddx58/Btnl9/Flot1/Cd47/Zc3hav1/Bcl10/Ticam1/Icosl/Myd88/Tlr3/Gpld1/Braf/Lgals3/Myo1g/Plcg2/Fcer1g/Plscr1/Ddx60/Nod2/Tlr1/Lgals9/Tlr7/Stap1/Tnfaip3/Usp9x/Malt1	40	33	ENSMUSG00000046688/ENSMUSG00000025498/ENSMUSG00000069874/ENSMUSG00000022126/ENSMUSG00000036908/ENSMUSG00000016024/ENSMUSG00000035914/ENSMUSG00000025314/ENSMUSG00000018899/ENSMUSG00000051457/ENSMUSG00000052270/ENSMUSG00000027995/ENSMUSG00000017830/ENSMUSG00000051439/ENSMUSG00000040296/ENSMUSG00000059714/ENSMUSG00000055447/ENSMUSG00000029826/ENSMUSG00000028191/ENSMUSG00000000732/ENSMUSG00000032508/…	7	ENSMUSG00000040283/ENSMUSG00000047123/ENSMUSG00000021340/ENSMUSG00000002413/ENSMUSG00000044583/ENSMUSG00000029254/ENSMUSG00000031010
BP	GO:0006869	lipid transport	40|1102	285|14957	5.99658e-05	0.00159961	ENSMUSG00000074345/ENSMUSG00000017754/ENSMUSG00000079263/ENSMUSG00000023073/ENSMUSG00000020826/ENSMUSG00000021948/ENSMUSG00000025044/ENSMUSG00000032080/ENSMUSG00000032193/ENSMUSG00000016024/ENSMUSG00000044254/ENSMUSG00000032883/ENSMUSG00000032231/ENSMUSG00000024851/ENSMUSG00000032083/ENSMUSG00000023088/ENSMUSG00000041324/ENSMUSG00000023022/ENSMUSG00000044749/ENSMUSG00000021135/ENSMUSG00000031378/…	Tnfaip8l3/Pltp/Gm6614/Slc10a2/Nos2/Prkcd/Msr1/Apoa4/Ldlr/Lbp/Pcsk9/Acsl3/Anxa2/Pitpnm1/Apoa1/Abcc1/Inhba/Lima1/Abca6/Slc10a1/Abcd1/Aqp8/Acsl1/Abca1/Scp2/Rbp4/Slco3a1/Atp9a/Hdlbp/Eprs/Slco2a1/Mttp/Abcc3/Col4a3bp/Apoa5/Igfbp3/Slc27a2/Slco1b2/Acat2/C2cd2l	40	19	ENSMUSG00000074345/ENSMUSG00000023073/ENSMUSG00000020826/ENSMUSG00000021948/ENSMUSG00000025044/ENSMUSG00000032193/ENSMUSG00000016024/ENSMUSG00000044254/ENSMUSG00000032883/ENSMUSG00000032231/ENSMUSG00000024851/ENSMUSG00000023088/ENSMUSG00000023022/ENSMUSG00000031378/ENSMUSG00000030762/ENSMUSG00000025790/ENSMUSG00000032548/ENSMUSG00000020865/ENSMUSG00000023832	21	ENSMUSG00000017754/ENSMUSG00000079263/ENSMUSG00000032080/ENSMUSG00000032083/ENSMUSG00000041324/ENSMUSG00000044749/ENSMUSG00000021135/ENSMUSG00000018796/ENSMUSG00000015243/ENSMUSG00000028603/ENSMUSG00000024990/ENSMUSG00000027546/ENSMUSG00000034088/ENSMUSG00000026615/ENSMUSG00000028158/ENSMUSG00000021669/ENSMUSG00000032079/ENSMUSG00000020427/ENSMUSG00000027359/ENSMUSG00000030236/ENSMUSG00000032120
BP	GO:0042102	positive regulation of T cell proliferation	18|1102	88|14957	6.14095e-05	0.00162959	ENSMUSG00000049103/ENSMUSG00000039217/ENSMUSG00000035914/ENSMUSG00000004043/ENSMUSG00000039323/ENSMUSG00000051457/ENSMUSG00000115338/ENSMUSG00000016496/ENSMUSG00000028076/ENSMUSG00000031805/ENSMUSG00000031101/ENSMUSG00000020053/ENSMUSG00000000732/ENSMUSG00000030707/ENSMUSG00000024397/ENSMUSG00000031497/ENSMUSG00000035042/ENSMUSG00000030793	Ccr2/Il18/Cd276/Stat5a/Igfbp2/Spn/Pnp/Cd274/Cd1d1/Jak3/Sash3/Igf1/Icosl/Coro1a/Aif1/Tnfsf13b/Ccl5/Pycard	18	16	ENSMUSG00000049103/ENSMUSG00000039217/ENSMUSG00000035914/ENSMUSG00000004043/ENSMUSG00000051457/ENSMUSG00000115338/ENSMUSG00000016496/ENSMUSG00000028076/ENSMUSG00000031805/ENSMUSG00000031101/ENSMUSG00000000732/ENSMUSG00000030707/ENSMUSG00000024397/ENSMUSG00000031497/ENSMUSG00000035042/ENSMUSG00000030793	2	ENSMUSG00000039323/ENSMUSG00000020053
BP	GO:0006084	acetyl-CoA metabolic process	10|1102	32|14957	6.51631e-05	0.00172024	ENSMUSG00000020917/ENSMUSG00000042010/ENSMUSG00000032047/ENSMUSG00000027952/ENSMUSG00000041939/ENSMUSG00000035232/ENSMUSG00000027875/ENSMUSG00000027605/ENSMUSG00000093930/ENSMUSG00000021620	Acly/Acacb/Acat1/Pmvk/Mvk/Pdk3/Hmgcs2/Acss2/Hmgcs1/Acot12	10	7	ENSMUSG00000020917/ENSMUSG00000042010/ENSMUSG00000027952/ENSMUSG00000041939/ENSMUSG00000035232/ENSMUSG00000027605/ENSMUSG00000093930	3	ENSMUSG00000032047/ENSMUSG00000027875/ENSMUSG00000021620
BP	GO:0010950	positive regulation of endopeptidase activity	24|1102	138|14957	6.58589e-05	0.00172964	ENSMUSG00000002083/ENSMUSG00000079197/ENSMUSG00000036986/ENSMUSG00000028039/ENSMUSG00000022216/ENSMUSG00000057789/ENSMUSG00000026104/ENSMUSG00000024778/ENSMUSG00000024789/ENSMUSG00000025887/ENSMUSG00000015599/ENSMUSG00000056071/ENSMUSG00000071369/ENSMUSG00000020340/ENSMUSG00000028191/ENSMUSG00000003955/ENSMUSG00000070390/ENSMUSG00000025888/ENSMUSG00000004040/ENSMUSG00000039304/ENSMUSG00000020372/…	Bbc3/Psme2/Pml/Efna3/Psme1/Bak1/Stat1/Fas/Jak2/Casp12/Ttbk1/S100a9/Map3k5/Cyfip2/Bcl10/Fam162a/Nlrp1b/Casp1/Stat3/Tnfsf10/Rack1/Pycard/Nlrc4/Malt1	24	21	ENSMUSG00000002083/ENSMUSG00000079197/ENSMUSG00000036986/ENSMUSG00000028039/ENSMUSG00000022216/ENSMUSG00000057789/ENSMUSG00000026104/ENSMUSG00000024778/ENSMUSG00000024789/ENSMUSG00000025887/ENSMUSG00000056071/ENSMUSG00000020340/ENSMUSG00000028191/ENSMUSG00000003955/ENSMUSG00000070390/ENSMUSG00000025888/ENSMUSG00000004040/ENSMUSG00000039304/ENSMUSG00000030793/ENSMUSG00000039193/ENSMUSG00000032688	3	ENSMUSG00000015599/ENSMUSG00000071369/ENSMUSG00000020372
BP	GO:0010952	positive regulation of peptidase activity	25|1102	147|14957	6.84309e-05	0.00178128	ENSMUSG00000002083/ENSMUSG00000079197/ENSMUSG00000036986/ENSMUSG00000028039/ENSMUSG00000022216/ENSMUSG00000057789/ENSMUSG00000026104/ENSMUSG00000024778/ENSMUSG00000024789/ENSMUSG00000025887/ENSMUSG00000015599/ENSMUSG00000056071/ENSMUSG00000071369/ENSMUSG00000020340/ENSMUSG00000028191/ENSMUSG00000003955/ENSMUSG00000070390/ENSMUSG00000025888/ENSMUSG00000004040/ENSMUSG00000039304/ENSMUSG00000020372/…	Bbc3/Psme2/Pml/Efna3/Psme1/Bak1/Stat1/Fas/Jak2/Casp12/Ttbk1/S100a9/Map3k5/Cyfip2/Bcl10/Fam162a/Nlrp1b/Casp1/Stat3/Tnfsf10/Rack1/Pycard/Kars/Nlrc4/Malt1	25	22	ENSMUSG00000002083/ENSMUSG00000079197/ENSMUSG00000036986/ENSMUSG00000028039/ENSMUSG00000022216/ENSMUSG00000057789/ENSMUSG00000026104/ENSMUSG00000024778/ENSMUSG00000024789/ENSMUSG00000025887/ENSMUSG00000056071/ENSMUSG00000020340/ENSMUSG00000028191/ENSMUSG00000003955/ENSMUSG00000070390/ENSMUSG00000025888/ENSMUSG00000004040/ENSMUSG00000039304/ENSMUSG00000030793/ENSMUSG00000031948/ENSMUSG00000039193/…	3	ENSMUSG00000015599/ENSMUSG00000071369/ENSMUSG00000020372
BP	GO:0002263	cell activation involved in immune response	34|1102	229|14957	6.85244e-05	0.00178128	ENSMUSG00000068220/ENSMUSG00000049103/ENSMUSG00000037405/ENSMUSG00000021624/ENSMUSG00000039217/ENSMUSG00000023249/ENSMUSG00000028064/ENSMUSG00000016024/ENSMUSG00000002983/ENSMUSG00000018899/ENSMUSG00000051457/ENSMUSG00000053175/ENSMUSG00000041471/ENSMUSG00000028874/ENSMUSG00000031805/ENSMUSG00000024300/ENSMUSG00000000290/ENSMUSG00000027347/ENSMUSG00000047123/ENSMUSG00000000732/ENSMUSG00000030707/…	Lgals1/Ccr2/Icam1/Cd180/Il18/Parp3/Sema4a/Lbp/Relb/Irf1/Spn/Bcl3/Shld2/Fgr/Jak3/Myo1f/Itgb2/Rasgrp1/Ticam1/Icosl/Coro1a/Lgals3/Plcg2/Fcer1g/Rac2/Stat3/Lcp1/Il27/Pycard/Lgals9/Kars/Dock2/Tnfaip3/Malt1	34	32	ENSMUSG00000068220/ENSMUSG00000049103/ENSMUSG00000037405/ENSMUSG00000021624/ENSMUSG00000039217/ENSMUSG00000023249/ENSMUSG00000028064/ENSMUSG00000016024/ENSMUSG00000002983/ENSMUSG00000018899/ENSMUSG00000051457/ENSMUSG00000053175/ENSMUSG00000028874/ENSMUSG00000031805/ENSMUSG00000024300/ENSMUSG00000000290/ENSMUSG00000027347/ENSMUSG00000000732/ENSMUSG00000030707/ENSMUSG00000050335/ENSMUSG00000034330/…	2	ENSMUSG00000041471/ENSMUSG00000047123
BP	GO:0001961	positive regulation of cytokine-mediated signaling pathway	12|1102	45|14957	7.08902e-05	0.00183343	ENSMUSG00000025498/ENSMUSG00000030895/ENSMUSG00000074151/ENSMUSG00000026072/ENSMUSG00000069874/ENSMUSG00000034422/ENSMUSG00000027514/ENSMUSG00000046879/ENSMUSG00000031451/ENSMUSG00000040329/ENSMUSG00000025888/ENSMUSG00000020115	Irf7/Hpx/Nlrc5/Il1r1/Irgm2/Parp14/Zbp1/Irgm1/Gas6/Il7/Casp1/Tbk1	12	11	ENSMUSG00000025498/ENSMUSG00000030895/ENSMUSG00000074151/ENSMUSG00000069874/ENSMUSG00000034422/ENSMUSG00000027514/ENSMUSG00000046879/ENSMUSG00000031451/ENSMUSG00000040329/ENSMUSG00000025888/ENSMUSG00000020115	1	ENSMUSG00000026072
BP	GO:0006613	cotranslational protein targeting to membrane	7|1102	16|14957	7.31727e-05	0.0018829	ENSMUSG00000030082/ENSMUSG00000020780/ENSMUSG00000036323/ENSMUSG00000019802/ENSMUSG00000032042/ENSMUSG00000027828/ENSMUSG00000025935	Sec61a1/Srp68/Srp72/Sec63/Srpr/Ssr3/Tram1	7	0		7	ENSMUSG00000030082/ENSMUSG00000020780/ENSMUSG00000036323/ENSMUSG00000019802/ENSMUSG00000032042/ENSMUSG00000027828/ENSMUSG00000025935
BP	GO:1903900	regulation of viral life cycle	23|1102	131|14957	7.97757e-05	0.0020425	ENSMUSG00000020914/ENSMUSG00000046718/ENSMUSG00000068220/ENSMUSG00000025492/ENSMUSG00000036986/ENSMUSG00000052776/ENSMUSG00000026542/ENSMUSG00000032231/ENSMUSG00000025130/ENSMUSG00000009585/ENSMUSG00000029561/ENSMUSG00000010175/ENSMUSG00000035692/ENSMUSG00000060591/ENSMUSG00000029826/ENSMUSG00000032383/ENSMUSG00000063268/ENSMUSG00000032369/ENSMUSG00000035042/ENSMUSG00000032661/ENSMUSG00000022283/…	Top2a/Bst2/Lgals1/Ifitm3/Pml/Oas1a/Apcs/Anxa2/P4hb/Apobec3/Oasl2/Prox1/Isg15/Ifitm2/Zc3hav1/Ppib/Parp10/Plscr1/Ccl5/Oas3/Pabpc1/Ddb1/Chmp4b	23	18	ENSMUSG00000020914/ENSMUSG00000046718/ENSMUSG00000068220/ENSMUSG00000025492/ENSMUSG00000036986/ENSMUSG00000052776/ENSMUSG00000026542/ENSMUSG00000032231/ENSMUSG00000009585/ENSMUSG00000029561/ENSMUSG00000035692/ENSMUSG00000060591/ENSMUSG00000029826/ENSMUSG00000063268/ENSMUSG00000032369/ENSMUSG00000035042/ENSMUSG00000032661/ENSMUSG00000038467	5	ENSMUSG00000025130/ENSMUSG00000010175/ENSMUSG00000032383/ENSMUSG00000022283/ENSMUSG00000024740
BP	GO:0045069	regulation of viral genome replication	17|1102	82|14957	8.17102e-05	0.00208157	ENSMUSG00000020914/ENSMUSG00000046718/ENSMUSG00000025492/ENSMUSG00000052776/ENSMUSG00000009585/ENSMUSG00000029561/ENSMUSG00000010175/ENSMUSG00000035692/ENSMUSG00000060591/ENSMUSG00000029826/ENSMUSG00000032383/ENSMUSG00000063268/ENSMUSG00000032369/ENSMUSG00000035042/ENSMUSG00000032661/ENSMUSG00000022283/ENSMUSG00000024740	Top2a/Bst2/Ifitm3/Oas1a/Apobec3/Oasl2/Prox1/Isg15/Ifitm2/Zc3hav1/Ppib/Parp10/Plscr1/Ccl5/Oas3/Pabpc1/Ddb1	17	13	ENSMUSG00000020914/ENSMUSG00000046718/ENSMUSG00000025492/ENSMUSG00000052776/ENSMUSG00000009585/ENSMUSG00000029561/ENSMUSG00000035692/ENSMUSG00000060591/ENSMUSG00000029826/ENSMUSG00000063268/ENSMUSG00000032369/ENSMUSG00000035042/ENSMUSG00000032661	4	ENSMUSG00000010175/ENSMUSG00000032383/ENSMUSG00000022283/ENSMUSG00000024740
BP	GO:0032729	positive regulation of interferon-gamma production	15|1102	67|14957	8.44031e-05	0.00213947	ENSMUSG00000026072/ENSMUSG00000049103/ENSMUSG00000039217/ENSMUSG00000041515/ENSMUSG00000035914/ENSMUSG00000053175/ENSMUSG00000051439/ENSMUSG00000028076/ENSMUSG00000031101/ENSMUSG00000027347/ENSMUSG00000031639/ENSMUSG00000044701/ENSMUSG00000030793/ENSMUSG00000044583/ENSMUSG00000079685	Il1r1/Ccr2/Il18/Irf8/Cd276/Bcl3/Cd14/Cd1d1/Sash3/Rasgrp1/Tlr3/Il27/Pycard/Tlr7/Ulbp1	15	13	ENSMUSG00000049103/ENSMUSG00000039217/ENSMUSG00000041515/ENSMUSG00000035914/ENSMUSG00000053175/ENSMUSG00000051439/ENSMUSG00000028076/ENSMUSG00000031101/ENSMUSG00000027347/ENSMUSG00000031639/ENSMUSG00000044701/ENSMUSG00000030793/ENSMUSG00000079685	2	ENSMUSG00000026072/ENSMUSG00000044583
BP	GO:0051235	maintenance of location	39|1102	280|14957	8.72171e-05	0.00219084	ENSMUSG00000026822/ENSMUSG00000026385/ENSMUSG00000002083/ENSMUSG00000045294/ENSMUSG00000036986/ENSMUSG00000025044/ENSMUSG00000079523/ENSMUSG00000049775/ENSMUSG00000032083/ENSMUSG00000004043/ENSMUSG00000079111/ENSMUSG00000022351/ENSMUSG00000000628/ENSMUSG00000042010/ENSMUSG00000032540/ENSMUSG00000034855/ENSMUSG00000002661/ENSMUSG00000030707/ENSMUSG00000048486/ENSMUSG00000028553/ENSMUSG00000034330/…	Lcn2/Dbi/Bbc3/Insig1/Pml/Msr1/Tmsb10/Tmsb4x/Apoa1/Stat5a/Kdelr2/Sqle/Hk2/Acacb/Abhd5/Cxcl10/Alkbh7/Coro1a/Fitm2/Angptl3/Plcg2/Mup1/Vps13a/Plin5/Sun1/Epb41l3/Rangap1/Slc30a3/Hk1/Itpr3/Lgals9/Slc8a1/Txn1/Aspm/Slc8b1/Flna/F2/Grik5/Ngf	39	27	ENSMUSG00000026822/ENSMUSG00000026385/ENSMUSG00000002083/ENSMUSG00000045294/ENSMUSG00000036986/ENSMUSG00000025044/ENSMUSG00000079523/ENSMUSG00000049775/ENSMUSG00000004043/ENSMUSG00000022351/ENSMUSG00000000628/ENSMUSG00000042010/ENSMUSG00000034855/ENSMUSG00000002661/ENSMUSG00000030707/ENSMUSG00000034330/ENSMUSG00000036817/ENSMUSG00000024044/ENSMUSG00000037012/ENSMUSG00000042644/ENSMUSG00000001123/…	12	ENSMUSG00000032083/ENSMUSG00000079111/ENSMUSG00000032540/ENSMUSG00000048486/ENSMUSG00000028553/ENSMUSG00000078683/ENSMUSG00000046230/ENSMUSG00000011305/ENSMUSG00000022391/ENSMUSG00000029151/ENSMUSG00000027249/ENSMUSG00000003378
BP	GO:0002218	activation of innate immune response	26|1102	158|14957	8.72895e-05	0.00219084	ENSMUSG00000046688/ENSMUSG00000025498/ENSMUSG00000069874/ENSMUSG00000022126/ENSMUSG00000036908/ENSMUSG00000016024/ENSMUSG00000018899/ENSMUSG00000027995/ENSMUSG00000017830/ENSMUSG00000051439/ENSMUSG00000040296/ENSMUSG00000059714/ENSMUSG00000029826/ENSMUSG00000028191/ENSMUSG00000047123/ENSMUSG00000032508/ENSMUSG00000031639/ENSMUSG00000037921/ENSMUSG00000055994/ENSMUSG00000044827/ENSMUSG00000030793/…	Tifa/Irf7/Irgm2/Acod1/Unc93b1/Lbp/Irf1/Tlr2/Dhx58/Cd14/Ddx58/Flot1/Zc3hav1/Bcl10/Ticam1/Myd88/Tlr3/Ddx60/Nod2/Tlr1/Pycard/Lgals9/Tlr7/Nlrc4/Tbk1/Tnfaip3	26	24	ENSMUSG00000046688/ENSMUSG00000025498/ENSMUSG00000069874/ENSMUSG00000022126/ENSMUSG00000036908/ENSMUSG00000016024/ENSMUSG00000018899/ENSMUSG00000027995/ENSMUSG00000017830/ENSMUSG00000051439/ENSMUSG00000040296/ENSMUSG00000059714/ENSMUSG00000029826/ENSMUSG00000028191/ENSMUSG00000032508/ENSMUSG00000031639/ENSMUSG00000037921/ENSMUSG00000055994/ENSMUSG00000044827/ENSMUSG00000030793/ENSMUSG00000001123/…	2	ENSMUSG00000047123/ENSMUSG00000044583
BP	GO:0032677	regulation of interleukin-8 production	14|1102	60|14957	8.96798e-05	0.00223698	ENSMUSG00000039217/ENSMUSG00000016024/ENSMUSG00000053175/ENSMUSG00000027995/ENSMUSG00000051439/ENSMUSG00000040296/ENSMUSG00000025083/ENSMUSG00000028191/ENSMUSG00000032508/ENSMUSG00000031639/ENSMUSG00000055994/ENSMUSG00000044827/ENSMUSG00000030793/ENSMUSG00000044583	Il18/Lbp/Bcl3/Tlr2/Cd14/Ddx58/Afap1l2/Bcl10/Myd88/Tlr3/Nod2/Tlr1/Pycard/Tlr7	14	13	ENSMUSG00000039217/ENSMUSG00000016024/ENSMUSG00000053175/ENSMUSG00000027995/ENSMUSG00000051439/ENSMUSG00000040296/ENSMUSG00000025083/ENSMUSG00000028191/ENSMUSG00000032508/ENSMUSG00000031639/ENSMUSG00000055994/ENSMUSG00000044827/ENSMUSG00000030793	1	ENSMUSG00000044583
BP	GO:0002221	pattern recognition receptor signaling pathway	23|1102	132|14957	9.00062e-05	0.00223698	ENSMUSG00000046688/ENSMUSG00000025498/ENSMUSG00000069874/ENSMUSG00000022126/ENSMUSG00000036908/ENSMUSG00000016024/ENSMUSG00000018899/ENSMUSG00000027995/ENSMUSG00000017830/ENSMUSG00000051439/ENSMUSG00000040296/ENSMUSG00000059714/ENSMUSG00000029826/ENSMUSG00000028191/ENSMUSG00000047123/ENSMUSG00000032508/ENSMUSG00000031639/ENSMUSG00000037921/ENSMUSG00000055994/ENSMUSG00000044827/ENSMUSG00000001123/…	Tifa/Irf7/Irgm2/Acod1/Unc93b1/Lbp/Irf1/Tlr2/Dhx58/Cd14/Ddx58/Flot1/Zc3hav1/Bcl10/Ticam1/Myd88/Tlr3/Ddx60/Nod2/Tlr1/Lgals9/Tlr7/Tnfaip3	23	21	ENSMUSG00000046688/ENSMUSG00000025498/ENSMUSG00000069874/ENSMUSG00000022126/ENSMUSG00000036908/ENSMUSG00000016024/ENSMUSG00000018899/ENSMUSG00000027995/ENSMUSG00000017830/ENSMUSG00000051439/ENSMUSG00000040296/ENSMUSG00000059714/ENSMUSG00000029826/ENSMUSG00000028191/ENSMUSG00000032508/ENSMUSG00000031639/ENSMUSG00000037921/ENSMUSG00000055994/ENSMUSG00000044827/ENSMUSG00000001123/ENSMUSG00000019850	2	ENSMUSG00000047123/ENSMUSG00000044583
BP	GO:0019216	regulation of lipid metabolic process	41|1102	301|14957	9.62809e-05	0.00236108	ENSMUSG00000027533/ENSMUSG00000026385/ENSMUSG00000074345/ENSMUSG00000036585/ENSMUSG00000055782/ENSMUSG00000045294/ENSMUSG00000030827/ENSMUSG00000021948/ENSMUSG00000032080/ENSMUSG00000032193/ENSMUSG00000008035/ENSMUSG00000032349/ENSMUSG00000002289/ENSMUSG00000041567/ENSMUSG00000032883/ENSMUSG00000036151/ENSMUSG00000057074/ENSMUSG00000032083/ENSMUSG00000004043/ENSMUSG00000052270/ENSMUSG00000037071/…	Fabp5/Dbi/Tnfaip8l3/Fgf1/Abcd2/Insig1/Fgf21/Prkcd/Apoa4/Ldlr/Mid1ip1/Elovl5/Angptl4/Serpina12/Acsl3/Tm6sf2/Ces1g/Apoa1/Stat5a/Fpr2/Scd1/Prox1/Acacb/Abcd1/Fgr/Scp2/Abhd5/Pdk3/Igf1/Adora1/Gpld1/Fitm2/Angptl3/Mup1/Plin5/Nfkb1/Nod2/Apoa5/Hcar2/Idh1/F2	41	23	ENSMUSG00000026385/ENSMUSG00000074345/ENSMUSG00000055782/ENSMUSG00000045294/ENSMUSG00000021948/ENSMUSG00000032193/ENSMUSG00000008035/ENSMUSG00000032349/ENSMUSG00000032883/ENSMUSG00000036151/ENSMUSG00000057074/ENSMUSG00000004043/ENSMUSG00000052270/ENSMUSG00000037071/ENSMUSG00000042010/ENSMUSG00000031378/ENSMUSG00000028874/ENSMUSG00000035232/ENSMUSG00000042429/ENSMUSG00000028163/ENSMUSG00000055994/…	18	ENSMUSG00000027533/ENSMUSG00000036585/ENSMUSG00000030827/ENSMUSG00000032080/ENSMUSG00000002289/ENSMUSG00000041567/ENSMUSG00000032083/ENSMUSG00000010175/ENSMUSG00000028603/ENSMUSG00000032540/ENSMUSG00000020053/ENSMUSG00000021340/ENSMUSG00000048486/ENSMUSG00000028553/ENSMUSG00000078683/ENSMUSG00000011305/ENSMUSG00000032079/ENSMUSG00000027249
BP	GO:0019079	viral genome replication	19|1102	99|14957	9.63208e-05	0.00236108	ENSMUSG00000020914/ENSMUSG00000046718/ENSMUSG00000025492/ENSMUSG00000052776/ENSMUSG00000009585/ENSMUSG00000029561/ENSMUSG00000010175/ENSMUSG00000031451/ENSMUSG00000035692/ENSMUSG00000060591/ENSMUSG00000029826/ENSMUSG00000032383/ENSMUSG00000063268/ENSMUSG00000032369/ENSMUSG00000035042/ENSMUSG00000032661/ENSMUSG00000047767/ENSMUSG00000022283/ENSMUSG00000024740	Top2a/Bst2/Ifitm3/Oas1a/Apobec3/Oasl2/Prox1/Gas6/Isg15/Ifitm2/Zc3hav1/Ppib/Parp10/Plscr1/Ccl5/Oas3/Atg16l2/Pabpc1/Ddb1	19	15	ENSMUSG00000020914/ENSMUSG00000046718/ENSMUSG00000025492/ENSMUSG00000052776/ENSMUSG00000009585/ENSMUSG00000029561/ENSMUSG00000031451/ENSMUSG00000035692/ENSMUSG00000060591/ENSMUSG00000029826/ENSMUSG00000063268/ENSMUSG00000032369/ENSMUSG00000035042/ENSMUSG00000032661/ENSMUSG00000047767	4	ENSMUSG00000010175/ENSMUSG00000032383/ENSMUSG00000022283/ENSMUSG00000024740
BP	GO:0070665	positive regulation of leukocyte proliferation	22|1102	124|14957	9.63894e-05	0.00236108	ENSMUSG00000049103/ENSMUSG00000039217/ENSMUSG00000035914/ENSMUSG00000004043/ENSMUSG00000039323/ENSMUSG00000051457/ENSMUSG00000115338/ENSMUSG00000016496/ENSMUSG00000028076/ENSMUSG00000031805/ENSMUSG00000040329/ENSMUSG00000031101/ENSMUSG00000020053/ENSMUSG00000047123/ENSMUSG00000000732/ENSMUSG00000030707/ENSMUSG00000032508/ENSMUSG00000024397/ENSMUSG00000031497/ENSMUSG00000035042/ENSMUSG00000030793/…	Ccr2/Il18/Cd276/Stat5a/Igfbp2/Spn/Pnp/Cd274/Cd1d1/Jak3/Il7/Sash3/Igf1/Ticam1/Icosl/Coro1a/Myd88/Aif1/Tnfsf13b/Ccl5/Pycard/Bst1	22	19	ENSMUSG00000049103/ENSMUSG00000039217/ENSMUSG00000035914/ENSMUSG00000004043/ENSMUSG00000051457/ENSMUSG00000115338/ENSMUSG00000016496/ENSMUSG00000028076/ENSMUSG00000031805/ENSMUSG00000040329/ENSMUSG00000031101/ENSMUSG00000000732/ENSMUSG00000030707/ENSMUSG00000032508/ENSMUSG00000024397/ENSMUSG00000031497/ENSMUSG00000035042/ENSMUSG00000030793/ENSMUSG00000029082	3	ENSMUSG00000039323/ENSMUSG00000020053/ENSMUSG00000047123
BP	GO:0051188	cofactor biosynthetic process	34|1102	233|14957	9.71653e-05	0.0023687	ENSMUSG00000022742/ENSMUSG00000017390/ENSMUSG00000039616/ENSMUSG00000015806/ENSMUSG00000032350/ENSMUSG00000068452/ENSMUSG00000020917/ENSMUSG00000037847/ENSMUSG00000034450/ENSMUSG00000028671/ENSMUSG00000000628/ENSMUSG00000042010/ENSMUSG00000032047/ENSMUSG00000018796/ENSMUSG00000036067/ENSMUSG00000064354/ENSMUSG00000032294/ENSMUSG00000035232/ENSMUSG00000020053/ENSMUSG00000025877/ENSMUSG00000028167/…	Cpox/Aldoc/Mocos/Qdpr/Gclc/Duox2/Acly/Nmrk1/Gulo/Gale/Hk2/Acacb/Acat1/Acsl1/Slc2a6/mt-Co2/Pkm/Pdk3/Igf1/Hk3/Bdh2/Gpd1/Pklr/Coq8b/Acss2/Adpgk/Stat3/Pank4/Hk1/Mmachc/Pfkp/Gch1/Atpif1/Gck	34	22	ENSMUSG00000017390/ENSMUSG00000039616/ENSMUSG00000015806/ENSMUSG00000032350/ENSMUSG00000068452/ENSMUSG00000020917/ENSMUSG00000028671/ENSMUSG00000000628/ENSMUSG00000042010/ENSMUSG00000036067/ENSMUSG00000064354/ENSMUSG00000032294/ENSMUSG00000035232/ENSMUSG00000025877/ENSMUSG00000028167/ENSMUSG00000003762/ENSMUSG00000027605/ENSMUSG00000004040/ENSMUSG00000037012/ENSMUSG00000021196/ENSMUSG00000037580/…	12	ENSMUSG00000022742/ENSMUSG00000037847/ENSMUSG00000034450/ENSMUSG00000032047/ENSMUSG00000018796/ENSMUSG00000020053/ENSMUSG00000023019/ENSMUSG00000041237/ENSMUSG00000025236/ENSMUSG00000029056/ENSMUSG00000028690/ENSMUSG00000041798
BP	GO:0002730	regulation of dendritic cell cytokine production	6|1102	12|14957	9.90156e-05	0.00240231	ENSMUSG00000027995/ENSMUSG00000040296/ENSMUSG00000031805/ENSMUSG00000047123/ENSMUSG00000031639/ENSMUSG00000055994	Tlr2/Ddx58/Jak3/Ticam1/Tlr3/Nod2	6	5	ENSMUSG00000027995/ENSMUSG00000040296/ENSMUSG00000031805/ENSMUSG00000031639/ENSMUSG00000055994	1	ENSMUSG00000047123
BP	GO:0006575	cellular modified amino acid metabolic process	26|1102	160|14957	0.000108096	0.00261019	ENSMUSG00000042102/ENSMUSG00000032350/ENSMUSG00000058135/ENSMUSG00000068452/ENSMUSG00000058216/ENSMUSG00000023232/ENSMUSG00000025130/ENSMUSG00000068762/ENSMUSG00000019838/ENSMUSG00000025934/ENSMUSG00000027199/ENSMUSG00000091387/ENSMUSG00000018906/ENSMUSG00000074768/ENSMUSG00000057933/ENSMUSG00000007036/ENSMUSG00000030088/ENSMUSG00000038155/ENSMUSG00000032369/ENSMUSG00000019916/ENSMUSG00000028690/…	Dmgdh/Gclc/Gstm1/Duox2/Gstp3/Serinc2/P4hb/Gstm6/Slc16a10/Gsta3/Gatm/Gcnt4/P4ha2/Bhmt/Gsta2/Abhd16a/Aldh1l1/Gstp2/Plscr1/P4ha1/Mmachc/Gstm4/Gch1/Idh1/Gm5424/Nat8	26	19	ENSMUSG00000032350/ENSMUSG00000058135/ENSMUSG00000068452/ENSMUSG00000023232/ENSMUSG00000068762/ENSMUSG00000019838/ENSMUSG00000025934/ENSMUSG00000027199/ENSMUSG00000018906/ENSMUSG00000057933/ENSMUSG00000007036/ENSMUSG00000030088/ENSMUSG00000038155/ENSMUSG00000032369/ENSMUSG00000019916/ENSMUSG00000027890/ENSMUSG00000037580/ENSMUSG00000025950/ENSMUSG00000046687	7	ENSMUSG00000042102/ENSMUSG00000058216/ENSMUSG00000025130/ENSMUSG00000091387/ENSMUSG00000074768/ENSMUSG00000028690/ENSMUSG00000030004
BP	GO:0050708	regulation of protein secretion	53|1102	425|14957	0.000108936	0.00261807	ENSMUSG00000027808/ENSMUSG00000078817/ENSMUSG00000001750/ENSMUSG00000036986/ENSMUSG00000042333/ENSMUSG00000020826/ENSMUSG00000038037/ENSMUSG00000036908/ENSMUSG00000029915/ENSMUSG00000020122/ENSMUSG00000035914/ENSMUSG00000022575/ENSMUSG00000032083/ENSMUSG00000037362/ENSMUSG00000031934/ENSMUSG00000024789/ENSMUSG00000049044/ENSMUSG00000027995/ENSMUSG00000016496/ENSMUSG00000028874/ENSMUSG00000051439/…	Serp1/Nlrp12/Tcirg1/Pml/Tnfrsf14/Nos2/Socs1/Unc93b1/Clec5a/Egfr/Cd276/Gsdmd/Apoa1/Nov/Panx1/Jak2/Rapgef4/Tlr2/Cd274/Fgr/Cd14/Gas6/Rbp4/Ddx58/Cd2ap/Rhbdf2/Rasgrp1/Igf1/Nlrp1b/Il17rc/Aif1/Gpld1/Casp1/Mup1/Ubr5/Oxct1/Nod2/Ccl5/P3h1/Tlr1/Hk1/Il1rap/Pycard/Lgals9/Kars/Adora2a/Sec24a/Hcar2/Cyp2j6/Slc8b1/Tnfaip3/Gck/C2cd2l	53	37	ENSMUSG00000001750/ENSMUSG00000036986/ENSMUSG00000042333/ENSMUSG00000020826/ENSMUSG00000038037/ENSMUSG00000036908/ENSMUSG00000029915/ENSMUSG00000035914/ENSMUSG00000022575/ENSMUSG00000037362/ENSMUSG00000031934/ENSMUSG00000024789/ENSMUSG00000027995/ENSMUSG00000016496/ENSMUSG00000028874/ENSMUSG00000051439/ENSMUSG00000031451/ENSMUSG00000040296/ENSMUSG00000061665/ENSMUSG00000020806/ENSMUSG00000027347/…	16	ENSMUSG00000027808/ENSMUSG00000078817/ENSMUSG00000020122/ENSMUSG00000032083/ENSMUSG00000049044/ENSMUSG00000024990/ENSMUSG00000020053/ENSMUSG00000021340/ENSMUSG00000078683/ENSMUSG00000037487/ENSMUSG00000028641/ENSMUSG00000022514/ENSMUSG00000036391/ENSMUSG00000052914/ENSMUSG00000041798/ENSMUSG00000032120
BP	GO:0043900	regulation of multi-organism process	45|1102	343|14957	0.000110412	0.00264107	ENSMUSG00000020914/ENSMUSG00000046718/ENSMUSG00000068220/ENSMUSG00000022126/ENSMUSG00000025492/ENSMUSG00000036986/ENSMUSG00000020826/ENSMUSG00000021624/ENSMUSG00000039217/ENSMUSG00000052776/ENSMUSG00000026542/ENSMUSG00000032231/ENSMUSG00000025130/ENSMUSG00000030220/ENSMUSG00000009585/ENSMUSG00000026104/ENSMUSG00000079363/ENSMUSG00000041324/ENSMUSG00000051457/ENSMUSG00000029561/ENSMUSG00000010175/…	Top2a/Bst2/Lgals1/Acod1/Ifitm3/Pml/Nos2/Cd180/Il18/Oas1a/Apcs/Anxa2/P4hb/Arhgdib/Apobec3/Stat1/Gbp4/Inhba/Spn/Oasl2/Prox1/Tlr2/Dhx58/Ddx58/Isg15/Ifitm2/Zc3hav1/Igf1/Fuca2/Ppib/Parp10/Plscr1/Ddx60/Nod2/Ccl5/Oas3/Il27/Traf3ip1/Pycard/Lgals9/Pabpc1/Ddb1/Tbk1/Tnfaip3/Chmp4b	45	37	ENSMUSG00000020914/ENSMUSG00000046718/ENSMUSG00000068220/ENSMUSG00000022126/ENSMUSG00000025492/ENSMUSG00000036986/ENSMUSG00000020826/ENSMUSG00000021624/ENSMUSG00000039217/ENSMUSG00000052776/ENSMUSG00000026542/ENSMUSG00000032231/ENSMUSG00000030220/ENSMUSG00000009585/ENSMUSG00000026104/ENSMUSG00000079363/ENSMUSG00000051457/ENSMUSG00000029561/ENSMUSG00000027995/ENSMUSG00000017830/ENSMUSG00000040296/…	8	ENSMUSG00000025130/ENSMUSG00000041324/ENSMUSG00000010175/ENSMUSG00000020053/ENSMUSG00000032383/ENSMUSG00000034292/ENSMUSG00000022283/ENSMUSG00000024740
BP	GO:0031663	lipopolysaccharide-mediated signaling pathway	12|1102	47|14957	0.000112274	0.00267307	ENSMUSG00000022126/ENSMUSG00000021624/ENSMUSG00000039217/ENSMUSG00000016024/ENSMUSG00000026104/ENSMUSG00000051439/ENSMUSG00000028191/ENSMUSG00000047123/ENSMUSG00000032508/ENSMUSG00000035042/ENSMUSG00000019850/ENSMUSG00000032688	Acod1/Cd180/Il18/Lbp/Stat1/Cd14/Bcl10/Ticam1/Myd88/Ccl5/Tnfaip3/Malt1	12	11	ENSMUSG00000022126/ENSMUSG00000021624/ENSMUSG00000039217/ENSMUSG00000016024/ENSMUSG00000026104/ENSMUSG00000051439/ENSMUSG00000028191/ENSMUSG00000032508/ENSMUSG00000035042/ENSMUSG00000019850/ENSMUSG00000032688	1	ENSMUSG00000047123
BP	GO:0072678	T cell migration	13|1102	54|14957	0.000112988	0.00267754	ENSMUSG00000042333/ENSMUSG00000049103/ENSMUSG00000037405/ENSMUSG00000027009/ENSMUSG00000051457/ENSMUSG00000035385/ENSMUSG00000031207/ENSMUSG00000034855/ENSMUSG00000024397/ENSMUSG00000020437/ENSMUSG00000035042/ENSMUSG00000030793/ENSMUSG00000001123	Tnfrsf14/Ccr2/Icam1/Itga4/Spn/Ccl2/Msn/Cxcl10/Aif1/Myo1g/Ccl5/Pycard/Lgals9	13	13	ENSMUSG00000042333/ENSMUSG00000049103/ENSMUSG00000037405/ENSMUSG00000027009/ENSMUSG00000051457/ENSMUSG00000035385/ENSMUSG00000031207/ENSMUSG00000034855/ENSMUSG00000024397/ENSMUSG00000020437/ENSMUSG00000035042/ENSMUSG00000030793/ENSMUSG00000001123	0
BP	GO:0002758	innate immune response-activating signal transduction	23|1102	134|14957	0.000114036	0.00268987	ENSMUSG00000046688/ENSMUSG00000025498/ENSMUSG00000069874/ENSMUSG00000022126/ENSMUSG00000036908/ENSMUSG00000016024/ENSMUSG00000018899/ENSMUSG00000027995/ENSMUSG00000017830/ENSMUSG00000051439/ENSMUSG00000040296/ENSMUSG00000059714/ENSMUSG00000029826/ENSMUSG00000028191/ENSMUSG00000047123/ENSMUSG00000032508/ENSMUSG00000031639/ENSMUSG00000037921/ENSMUSG00000055994/ENSMUSG00000044827/ENSMUSG00000001123/…	Tifa/Irf7/Irgm2/Acod1/Unc93b1/Lbp/Irf1/Tlr2/Dhx58/Cd14/Ddx58/Flot1/Zc3hav1/Bcl10/Ticam1/Myd88/Tlr3/Ddx60/Nod2/Tlr1/Lgals9/Tlr7/Tnfaip3	23	21	ENSMUSG00000046688/ENSMUSG00000025498/ENSMUSG00000069874/ENSMUSG00000022126/ENSMUSG00000036908/ENSMUSG00000016024/ENSMUSG00000018899/ENSMUSG00000027995/ENSMUSG00000017830/ENSMUSG00000051439/ENSMUSG00000040296/ENSMUSG00000059714/ENSMUSG00000029826/ENSMUSG00000028191/ENSMUSG00000032508/ENSMUSG00000031639/ENSMUSG00000037921/ENSMUSG00000055994/ENSMUSG00000044827/ENSMUSG00000001123/ENSMUSG00000019850	2	ENSMUSG00000047123/ENSMUSG00000044583
BP	GO:0046461	neutral lipid catabolic process	10|1102	34|14957	0.000115664	0.00269614	ENSMUSG00000030827/ENSMUSG00000032080/ENSMUSG00000032193/ENSMUSG00000003123/ENSMUSG00000032083/ENSMUSG00000032540/ENSMUSG00000007036/ENSMUSG00000021340/ENSMUSG00000011305/ENSMUSG00000032079	Fgf21/Apoa4/Ldlr/Lipe/Apoa1/Abhd5/Abhd16a/Gpld1/Plin5/Apoa5	10	3	ENSMUSG00000032193/ENSMUSG00000003123/ENSMUSG00000007036	7	ENSMUSG00000030827/ENSMUSG00000032080/ENSMUSG00000032083/ENSMUSG00000032540/ENSMUSG00000021340/ENSMUSG00000011305/ENSMUSG00000032079
BP	GO:0046464	acylglycerol catabolic process	10|1102	34|14957	0.000115664	0.00269614	ENSMUSG00000030827/ENSMUSG00000032080/ENSMUSG00000032193/ENSMUSG00000003123/ENSMUSG00000032083/ENSMUSG00000032540/ENSMUSG00000007036/ENSMUSG00000021340/ENSMUSG00000011305/ENSMUSG00000032079	Fgf21/Apoa4/Ldlr/Lipe/Apoa1/Abhd5/Abhd16a/Gpld1/Plin5/Apoa5	10	3	ENSMUSG00000032193/ENSMUSG00000003123/ENSMUSG00000007036	7	ENSMUSG00000030827/ENSMUSG00000032080/ENSMUSG00000032083/ENSMUSG00000032540/ENSMUSG00000021340/ENSMUSG00000011305/ENSMUSG00000032079
BP	GO:2000377	regulation of reactive oxygen species metabolic process	29|1102	188|14957	0.000115889	0.00269614	ENSMUSG00000031722/ENSMUSG00000022126/ENSMUSG00000055782/ENSMUSG00000021948/ENSMUSG00000037405/ENSMUSG00000039217/ENSMUSG00000020122/ENSMUSG00000052270/ENSMUSG00000024789/ENSMUSG00000000628/ENSMUSG00000027995/ENSMUSG00000032000/ENSMUSG00000031378/ENSMUSG00000064354/ENSMUSG00000000290/ENSMUSG00000035232/ENSMUSG00000055447/ENSMUSG00000020053/ENSMUSG00000047123/ENSMUSG00000037902/ENSMUSG00000024397/…	Hp/Acod1/Abcd2/Prkcd/Icam1/Il18/Egfr/Fpr2/Jak2/Hk2/Tlr2/Birc3/Abcd1/mt-Co2/Itgb2/Pdk3/Cd47/Igf1/Ticam1/Sirpa/Aif1/Gnai2/Gla/Plin5/Stat3/Hsp90aa1/Ulbp1/Gch1/F2	29	24	ENSMUSG00000031722/ENSMUSG00000022126/ENSMUSG00000055782/ENSMUSG00000021948/ENSMUSG00000037405/ENSMUSG00000039217/ENSMUSG00000052270/ENSMUSG00000024789/ENSMUSG00000000628/ENSMUSG00000027995/ENSMUSG00000032000/ENSMUSG00000031378/ENSMUSG00000064354/ENSMUSG00000000290/ENSMUSG00000035232/ENSMUSG00000055447/ENSMUSG00000037902/ENSMUSG00000024397/ENSMUSG00000032562/ENSMUSG00000031266/ENSMUSG00000004040/…	5	ENSMUSG00000020122/ENSMUSG00000020053/ENSMUSG00000047123/ENSMUSG00000011305/ENSMUSG00000027249
BP	GO:0046631	alpha-beta T cell activation	24|1102	143|14957	0.000117463	0.00272033	ENSMUSG00000001750/ENSMUSG00000042333/ENSMUSG00000049103/ENSMUSG00000039217/ENSMUSG00000038037/ENSMUSG00000028064/ENSMUSG00000002983/ENSMUSG00000018899/ENSMUSG00000051457/ENSMUSG00000053175/ENSMUSG00000115338/ENSMUSG00000016496/ENSMUSG00000028076/ENSMUSG00000031805/ENSMUSG00000050350/ENSMUSG00000031101/ENSMUSG00000002413/ENSMUSG00000004040/ENSMUSG00000044701/ENSMUSG00000001123/ENSMUSG00000020178/…	Tcirg1/Tnfrsf14/Ccr2/Il18/Socs1/Sema4a/Relb/Irf1/Spn/Bcl3/Pnp/Cd274/Cd1d1/Jak3/Gpr18/Sash3/Braf/Stat3/Il27/Lgals9/Adora2a/Dock2/Tnfsf8/Malt1	24	23	ENSMUSG00000001750/ENSMUSG00000042333/ENSMUSG00000049103/ENSMUSG00000039217/ENSMUSG00000038037/ENSMUSG00000028064/ENSMUSG00000002983/ENSMUSG00000018899/ENSMUSG00000051457/ENSMUSG00000053175/ENSMUSG00000115338/ENSMUSG00000016496/ENSMUSG00000028076/ENSMUSG00000031805/ENSMUSG00000050350/ENSMUSG00000031101/ENSMUSG00000004040/ENSMUSG00000044701/ENSMUSG00000001123/ENSMUSG00000020178/ENSMUSG00000020143/…	1	ENSMUSG00000002413
BP	GO:0006637	acyl-CoA metabolic process	16|1102	77|14957	0.000127535	0.00292699	ENSMUSG00000020917/ENSMUSG00000042010/ENSMUSG00000032047/ENSMUSG00000031378/ENSMUSG00000018796/ENSMUSG00000028603/ENSMUSG00000027952/ENSMUSG00000072949/ENSMUSG00000041939/ENSMUSG00000035232/ENSMUSG00000030759/ENSMUSG00000027875/ENSMUSG00000027605/ENSMUSG00000093930/ENSMUSG00000030935/ENSMUSG00000021620	Acly/Acacb/Acat1/Abcd1/Acsl1/Scp2/Pmvk/Acot1/Mvk/Pdk3/Far1/Hmgcs2/Acss2/Hmgcs1/Acsm3/Acot12	16	9	ENSMUSG00000020917/ENSMUSG00000042010/ENSMUSG00000031378/ENSMUSG00000027952/ENSMUSG00000041939/ENSMUSG00000035232/ENSMUSG00000030759/ENSMUSG00000027605/ENSMUSG00000093930	7	ENSMUSG00000032047/ENSMUSG00000018796/ENSMUSG00000028603/ENSMUSG00000072949/ENSMUSG00000027875/ENSMUSG00000030935/ENSMUSG00000021620
BP	GO:0035383	thioester metabolic process	16|1102	77|14957	0.000127535	0.00292699	ENSMUSG00000020917/ENSMUSG00000042010/ENSMUSG00000032047/ENSMUSG00000031378/ENSMUSG00000018796/ENSMUSG00000028603/ENSMUSG00000027952/ENSMUSG00000072949/ENSMUSG00000041939/ENSMUSG00000035232/ENSMUSG00000030759/ENSMUSG00000027875/ENSMUSG00000027605/ENSMUSG00000093930/ENSMUSG00000030935/ENSMUSG00000021620	Acly/Acacb/Acat1/Abcd1/Acsl1/Scp2/Pmvk/Acot1/Mvk/Pdk3/Far1/Hmgcs2/Acss2/Hmgcs1/Acsm3/Acot12	16	9	ENSMUSG00000020917/ENSMUSG00000042010/ENSMUSG00000031378/ENSMUSG00000027952/ENSMUSG00000041939/ENSMUSG00000035232/ENSMUSG00000030759/ENSMUSG00000027605/ENSMUSG00000093930	7	ENSMUSG00000032047/ENSMUSG00000018796/ENSMUSG00000028603/ENSMUSG00000072949/ENSMUSG00000027875/ENSMUSG00000030935/ENSMUSG00000021620
BP	GO:0046889	positive regulation of lipid biosynthetic process	17|1102	85|14957	0.000130561	0.00298299	ENSMUSG00000026385/ENSMUSG00000036585/ENSMUSG00000055782/ENSMUSG00000021948/ENSMUSG00000032080/ENSMUSG00000032193/ENSMUSG00000008035/ENSMUSG00000032349/ENSMUSG00000032883/ENSMUSG00000032083/ENSMUSG00000052270/ENSMUSG00000031378/ENSMUSG00000028603/ENSMUSG00000020053/ENSMUSG00000021340/ENSMUSG00000011305/ENSMUSG00000032079	Dbi/Fgf1/Abcd2/Prkcd/Apoa4/Ldlr/Mid1ip1/Elovl5/Acsl3/Apoa1/Fpr2/Abcd1/Scp2/Igf1/Gpld1/Plin5/Apoa5	17	9	ENSMUSG00000026385/ENSMUSG00000055782/ENSMUSG00000021948/ENSMUSG00000032193/ENSMUSG00000008035/ENSMUSG00000032349/ENSMUSG00000032883/ENSMUSG00000052270/ENSMUSG00000031378	8	ENSMUSG00000036585/ENSMUSG00000032080/ENSMUSG00000032083/ENSMUSG00000028603/ENSMUSG00000020053/ENSMUSG00000021340/ENSMUSG00000011305/ENSMUSG00000032079
BP	GO:0002764	immune response-regulating signaling pathway	40|1102	296|14957	0.000138569	0.00315183	ENSMUSG00000046688/ENSMUSG00000025498/ENSMUSG00000069874/ENSMUSG00000022126/ENSMUSG00000036908/ENSMUSG00000016024/ENSMUSG00000035914/ENSMUSG00000025314/ENSMUSG00000018899/ENSMUSG00000051457/ENSMUSG00000052270/ENSMUSG00000027995/ENSMUSG00000017830/ENSMUSG00000051439/ENSMUSG00000040296/ENSMUSG00000040283/ENSMUSG00000059714/ENSMUSG00000055447/ENSMUSG00000029826/ENSMUSG00000028191/ENSMUSG00000047123/…	Tifa/Irf7/Irgm2/Acod1/Unc93b1/Lbp/Cd276/Ptprj/Irf1/Spn/Fpr2/Tlr2/Dhx58/Cd14/Ddx58/Btnl9/Flot1/Cd47/Zc3hav1/Bcl10/Ticam1/Icosl/Myd88/Tlr3/Gpld1/Braf/Lgals3/Myo1g/Plcg2/Fcer1g/Plscr1/Ddx60/Nod2/Tlr1/Lgals9/Tlr7/Stap1/Tnfaip3/Usp9x/Malt1	40	33	ENSMUSG00000046688/ENSMUSG00000025498/ENSMUSG00000069874/ENSMUSG00000022126/ENSMUSG00000036908/ENSMUSG00000016024/ENSMUSG00000035914/ENSMUSG00000025314/ENSMUSG00000018899/ENSMUSG00000051457/ENSMUSG00000052270/ENSMUSG00000027995/ENSMUSG00000017830/ENSMUSG00000051439/ENSMUSG00000040296/ENSMUSG00000059714/ENSMUSG00000055447/ENSMUSG00000029826/ENSMUSG00000028191/ENSMUSG00000000732/ENSMUSG00000032508/…	7	ENSMUSG00000040283/ENSMUSG00000047123/ENSMUSG00000021340/ENSMUSG00000002413/ENSMUSG00000044583/ENSMUSG00000029254/ENSMUSG00000031010
BP	GO:0002791	regulation of peptide secretion	55|1102	451|14957	0.000146941	0.00330443	ENSMUSG00000027808/ENSMUSG00000078817/ENSMUSG00000001750/ENSMUSG00000036986/ENSMUSG00000042333/ENSMUSG00000020826/ENSMUSG00000038037/ENSMUSG00000036908/ENSMUSG00000029915/ENSMUSG00000020122/ENSMUSG00000035914/ENSMUSG00000022575/ENSMUSG00000032083/ENSMUSG00000037362/ENSMUSG00000031934/ENSMUSG00000024789/ENSMUSG00000049044/ENSMUSG00000027995/ENSMUSG00000016496/ENSMUSG00000028874/ENSMUSG00000051439/…	Serp1/Nlrp12/Tcirg1/Pml/Tnfrsf14/Nos2/Socs1/Unc93b1/Clec5a/Egfr/Cd276/Gsdmd/Apoa1/Nov/Panx1/Jak2/Rapgef4/Tlr2/Cd274/Fgr/Cd14/Gas6/Rbp4/S100a9/Ddx58/Cd2ap/Rhbdf2/Rasgrp1/Igf1/Nlrp1b/Il17rc/Adora1/Aif1/Gpld1/Casp1/Mup1/Ubr5/Oxct1/Nod2/Ccl5/P3h1/Tlr1/Hk1/Il1rap/Pycard/Lgals9/Kars/Adora2a/Sec24a/Hcar2/Cyp2j6/Slc8b1/Tnfaip3/Gck/C2cd2l	55	39	ENSMUSG00000001750/ENSMUSG00000036986/ENSMUSG00000042333/ENSMUSG00000020826/ENSMUSG00000038037/ENSMUSG00000036908/ENSMUSG00000029915/ENSMUSG00000035914/ENSMUSG00000022575/ENSMUSG00000037362/ENSMUSG00000031934/ENSMUSG00000024789/ENSMUSG00000027995/ENSMUSG00000016496/ENSMUSG00000028874/ENSMUSG00000051439/ENSMUSG00000031451/ENSMUSG00000056071/ENSMUSG00000040296/ENSMUSG00000061665/ENSMUSG00000020806/…	16	ENSMUSG00000027808/ENSMUSG00000078817/ENSMUSG00000020122/ENSMUSG00000032083/ENSMUSG00000049044/ENSMUSG00000024990/ENSMUSG00000020053/ENSMUSG00000021340/ENSMUSG00000078683/ENSMUSG00000037487/ENSMUSG00000028641/ENSMUSG00000022514/ENSMUSG00000036391/ENSMUSG00000052914/ENSMUSG00000041798/ENSMUSG00000032120
BP	GO:0002683	negative regulation of immune system process	53|1102	430|14957	0.0001472	0.00330443	ENSMUSG00000074151/ENSMUSG00000031628/ENSMUSG00000022126/ENSMUSG00000042726/ENSMUSG00000023367/ENSMUSG00000042333/ENSMUSG00000026043/ENSMUSG00000049103/ENSMUSG00000034422/ENSMUSG00000032193/ENSMUSG00000029810/ENSMUSG00000039217/ENSMUSG00000023249/ENSMUSG00000038037/ENSMUSG00000039384/ENSMUSG00000026542/ENSMUSG00000031594/ENSMUSG00000038213/ENSMUSG00000035914/ENSMUSG00000032083/ENSMUSG00000037362/…	Nlrc5/Casp3/Acod1/Trafd1/Tmem176a/Tnfrsf14/Col3a1/Ccr2/Parp14/Ldlr/Tmem176b/Il18/Parp3/Socs1/Dusp10/Apcs/Fgl1/Tapbpl/Cd276/Apoa1/Nov/Stat5a/Ptprj/Irf1/Spn/Fas/Tap1/Serpinb9/Cd274/Clec2d/Dhx58/Jak3/Gpr18/Slamf8/Zc3h12d/Cd47/Emilin1/Bcl10/Igf1/Adora1/Lgals3/Fcer1g/Nod2/Vsig4/Slfn1/Traf3ip1/Lgals9/Adora2a/Ccr1/Stap1/Tnfaip3/Psma1/Gpnmb	53	47	ENSMUSG00000074151/ENSMUSG00000031628/ENSMUSG00000022126/ENSMUSG00000042726/ENSMUSG00000023367/ENSMUSG00000042333/ENSMUSG00000026043/ENSMUSG00000049103/ENSMUSG00000034422/ENSMUSG00000032193/ENSMUSG00000029810/ENSMUSG00000039217/ENSMUSG00000023249/ENSMUSG00000038037/ENSMUSG00000039384/ENSMUSG00000026542/ENSMUSG00000031594/ENSMUSG00000038213/ENSMUSG00000035914/ENSMUSG00000037362/ENSMUSG00000004043/…	6	ENSMUSG00000032083/ENSMUSG00000020053/ENSMUSG00000044206/ENSMUSG00000034292/ENSMUSG00000029254/ENSMUSG00000029816
BP	GO:0018108	peptidyl-tyrosine phosphorylation	38|1102	277|14957	0.000147364	0.00330443	ENSMUSG00000030895/ENSMUSG00000022425/ENSMUSG00000042333/ENSMUSG00000021948/ENSMUSG00000034422/ENSMUSG00000037405/ENSMUSG00000039217/ENSMUSG00000038037/ENSMUSG00000028517/ENSMUSG00000021451/ENSMUSG00000015947/ENSMUSG00000020122/ENSMUSG00000004043/ENSMUSG00000022831/ENSMUSG00000025314/ENSMUSG00000018899/ENSMUSG00000024789/ENSMUSG00000000881/ENSMUSG00000015599/ENSMUSG00000028874/ENSMUSG00000031451/…	Hpx/Enpp2/Tnfrsf14/Prkcd/Parp14/Icam1/Il18/Socs1/Plpp3/Sema4d/Fcgr1/Egfr/Stat5a/Hcls1/Ptprj/Irf1/Jak2/Dlg3/Ttbk1/Fgr/Gas6/Tnfrsf1a/Jak3/Il7/Mvp/Itgb2/Igf1/Adora1/Hck/Nod2/Ccl5/Hk1/Traf3ip1/Bst1/Inpp5f/Ehd4/Stap1/Iqgap1	38	30	ENSMUSG00000030895/ENSMUSG00000042333/ENSMUSG00000021948/ENSMUSG00000034422/ENSMUSG00000037405/ENSMUSG00000039217/ENSMUSG00000038037/ENSMUSG00000021451/ENSMUSG00000015947/ENSMUSG00000004043/ENSMUSG00000022831/ENSMUSG00000025314/ENSMUSG00000018899/ENSMUSG00000024789/ENSMUSG00000000881/ENSMUSG00000028874/ENSMUSG00000031451/ENSMUSG00000030341/ENSMUSG00000031805/ENSMUSG00000040329/ENSMUSG00000030681/…	8	ENSMUSG00000022425/ENSMUSG00000028517/ENSMUSG00000020122/ENSMUSG00000015599/ENSMUSG00000020053/ENSMUSG00000034292/ENSMUSG00000042105/ENSMUSG00000029254
BP	GO:0046890	regulation of lipid biosynthetic process	25|1102	154|14957	0.000147872	0.00330443	ENSMUSG00000027533/ENSMUSG00000026385/ENSMUSG00000036585/ENSMUSG00000055782/ENSMUSG00000045294/ENSMUSG00000021948/ENSMUSG00000032080/ENSMUSG00000032193/ENSMUSG00000008035/ENSMUSG00000032349/ENSMUSG00000041567/ENSMUSG00000032883/ENSMUSG00000032083/ENSMUSG00000052270/ENSMUSG00000010175/ENSMUSG00000031378/ENSMUSG00000028603/ENSMUSG00000020053/ENSMUSG00000021340/ENSMUSG00000048486/ENSMUSG00000078683/…	Fabp5/Dbi/Fgf1/Abcd2/Insig1/Prkcd/Apoa4/Ldlr/Mid1ip1/Elovl5/Serpina12/Acsl3/Apoa1/Fpr2/Prox1/Abcd1/Scp2/Igf1/Gpld1/Fitm2/Mup1/Plin5/Nfkb1/Apoa5/Idh1	25	12	ENSMUSG00000026385/ENSMUSG00000055782/ENSMUSG00000045294/ENSMUSG00000021948/ENSMUSG00000032193/ENSMUSG00000008035/ENSMUSG00000032349/ENSMUSG00000032883/ENSMUSG00000052270/ENSMUSG00000031378/ENSMUSG00000028163/ENSMUSG00000025950	13	ENSMUSG00000027533/ENSMUSG00000036585/ENSMUSG00000032080/ENSMUSG00000041567/ENSMUSG00000032083/ENSMUSG00000010175/ENSMUSG00000028603/ENSMUSG00000020053/ENSMUSG00000021340/ENSMUSG00000048486/ENSMUSG00000078683/ENSMUSG00000011305/ENSMUSG00000032079
BP	GO:0002718	regulation of cytokine production involved in immune response	16|1102	78|14957	0.000149647	0.00332949	ENSMUSG00000026072/ENSMUSG00000042333/ENSMUSG00000049103/ENSMUSG00000039217/ENSMUSG00000032083/ENSMUSG00000027995/ENSMUSG00000040296/ENSMUSG00000031805/ENSMUSG00000031101/ENSMUSG00000047123/ENSMUSG00000031639/ENSMUSG00000058715/ENSMUSG00000055994/ENSMUSG00000037012/ENSMUSG00000031948/ENSMUSG00000032688	Il1r1/Tnfrsf14/Ccr2/Il18/Apoa1/Tlr2/Ddx58/Jak3/Sash3/Ticam1/Tlr3/Fcer1g/Nod2/Hk1/Kars/Malt1	16	13	ENSMUSG00000042333/ENSMUSG00000049103/ENSMUSG00000039217/ENSMUSG00000027995/ENSMUSG00000040296/ENSMUSG00000031805/ENSMUSG00000031101/ENSMUSG00000031639/ENSMUSG00000058715/ENSMUSG00000055994/ENSMUSG00000037012/ENSMUSG00000031948/ENSMUSG00000032688	3	ENSMUSG00000026072/ENSMUSG00000032083/ENSMUSG00000047123
BP	GO:0002371	dendritic cell cytokine production	6|1102	13|14957	0.000172428	0.00380311	ENSMUSG00000027995/ENSMUSG00000040296/ENSMUSG00000031805/ENSMUSG00000047123/ENSMUSG00000031639/ENSMUSG00000055994	Tlr2/Ddx58/Jak3/Ticam1/Tlr3/Nod2	6	5	ENSMUSG00000027995/ENSMUSG00000040296/ENSMUSG00000031805/ENSMUSG00000031639/ENSMUSG00000055994	1	ENSMUSG00000047123
BP	GO:0044241	lipid digestion	6|1102	13|14957	0.000172428	0.00380311	ENSMUSG00000032080/ENSMUSG00000032193/ENSMUSG00000032083/ENSMUSG00000023022/ENSMUSG00000032079/ENSMUSG00000023832	Apoa4/Ldlr/Apoa1/Lima1/Apoa5/Acat2	6	3	ENSMUSG00000032193/ENSMUSG00000023022/ENSMUSG00000023832	3	ENSMUSG00000032080/ENSMUSG00000032083/ENSMUSG00000032079
BP	GO:0018212	peptidyl-tyrosine modification	38|1102	280|14957	0.000184425	0.0040502	ENSMUSG00000030895/ENSMUSG00000022425/ENSMUSG00000042333/ENSMUSG00000021948/ENSMUSG00000034422/ENSMUSG00000037405/ENSMUSG00000039217/ENSMUSG00000038037/ENSMUSG00000028517/ENSMUSG00000021451/ENSMUSG00000015947/ENSMUSG00000020122/ENSMUSG00000004043/ENSMUSG00000022831/ENSMUSG00000025314/ENSMUSG00000018899/ENSMUSG00000024789/ENSMUSG00000000881/ENSMUSG00000015599/ENSMUSG00000028874/ENSMUSG00000031451/…	Hpx/Enpp2/Tnfrsf14/Prkcd/Parp14/Icam1/Il18/Socs1/Plpp3/Sema4d/Fcgr1/Egfr/Stat5a/Hcls1/Ptprj/Irf1/Jak2/Dlg3/Ttbk1/Fgr/Gas6/Tnfrsf1a/Jak3/Il7/Mvp/Itgb2/Igf1/Adora1/Hck/Nod2/Ccl5/Hk1/Traf3ip1/Bst1/Inpp5f/Ehd4/Stap1/Iqgap1	38	30	ENSMUSG00000030895/ENSMUSG00000042333/ENSMUSG00000021948/ENSMUSG00000034422/ENSMUSG00000037405/ENSMUSG00000039217/ENSMUSG00000038037/ENSMUSG00000021451/ENSMUSG00000015947/ENSMUSG00000004043/ENSMUSG00000022831/ENSMUSG00000025314/ENSMUSG00000018899/ENSMUSG00000024789/ENSMUSG00000000881/ENSMUSG00000028874/ENSMUSG00000031451/ENSMUSG00000030341/ENSMUSG00000031805/ENSMUSG00000040329/ENSMUSG00000030681/…	8	ENSMUSG00000022425/ENSMUSG00000028517/ENSMUSG00000020122/ENSMUSG00000015599/ENSMUSG00000020053/ENSMUSG00000034292/ENSMUSG00000042105/ENSMUSG00000029254
BP	GO:0050730	regulation of peptidyl-tyrosine phosphorylation	32|1102	222|14957	0.000193739	0.00423647	ENSMUSG00000030895/ENSMUSG00000022425/ENSMUSG00000042333/ENSMUSG00000021948/ENSMUSG00000034422/ENSMUSG00000037405/ENSMUSG00000039217/ENSMUSG00000038037/ENSMUSG00000028517/ENSMUSG00000021451/ENSMUSG00000015947/ENSMUSG00000020122/ENSMUSG00000022831/ENSMUSG00000025314/ENSMUSG00000018899/ENSMUSG00000024789/ENSMUSG00000000881/ENSMUSG00000031451/ENSMUSG00000030341/ENSMUSG00000040329/ENSMUSG00000030681/…	Hpx/Enpp2/Tnfrsf14/Prkcd/Parp14/Icam1/Il18/Socs1/Plpp3/Sema4d/Fcgr1/Egfr/Hcls1/Ptprj/Irf1/Jak2/Dlg3/Gas6/Tnfrsf1a/Il7/Mvp/Itgb2/Igf1/Adora1/Nod2/Ccl5/Traf3ip1/Bst1/Inpp5f/Ehd4/Stap1/Iqgap1	32	25	ENSMUSG00000030895/ENSMUSG00000042333/ENSMUSG00000021948/ENSMUSG00000034422/ENSMUSG00000037405/ENSMUSG00000039217/ENSMUSG00000038037/ENSMUSG00000021451/ENSMUSG00000015947/ENSMUSG00000022831/ENSMUSG00000025314/ENSMUSG00000018899/ENSMUSG00000024789/ENSMUSG00000000881/ENSMUSG00000031451/ENSMUSG00000030341/ENSMUSG00000040329/ENSMUSG00000030681/ENSMUSG00000000290/ENSMUSG00000042429/ENSMUSG00000055994/…	7	ENSMUSG00000022425/ENSMUSG00000028517/ENSMUSG00000020122/ENSMUSG00000020053/ENSMUSG00000034292/ENSMUSG00000042105/ENSMUSG00000029254
BP	GO:2000116	regulation of cysteine-type endopeptidase activity	30|1102	203|14957	0.000194811	0.00424173	ENSMUSG00000078817/ENSMUSG00000002083/ENSMUSG00000036986/ENSMUSG00000057789/ENSMUSG00000026104/ENSMUSG00000090877/ENSMUSG00000024778/ENSMUSG00000024789/ENSMUSG00000032000/ENSMUSG00000025887/ENSMUSG00000015599/ENSMUSG00000031451/ENSMUSG00000056071/ENSMUSG00000071369/ENSMUSG00000020340/ENSMUSG00000096727/ENSMUSG00000028191/ENSMUSG00000020053/ENSMUSG00000003955/ENSMUSG00000070390/ENSMUSG00000025888/…	Nlrp12/Bbc3/Pml/Bak1/Stat1/Hspa1b/Fas/Jak2/Birc3/Casp12/Ttbk1/Gas6/S100a9/Map3k5/Cyfip2/Psmb9/Bcl10/Igf1/Fam162a/Nlrp1b/Casp1/Xiap/Tnfsf10/Rack1/Naip2/Pycard/Adora2a/Nlrc4/Malt1/Rps6ka1	30	24	ENSMUSG00000002083/ENSMUSG00000036986/ENSMUSG00000057789/ENSMUSG00000026104/ENSMUSG00000090877/ENSMUSG00000024778/ENSMUSG00000024789/ENSMUSG00000032000/ENSMUSG00000025887/ENSMUSG00000031451/ENSMUSG00000056071/ENSMUSG00000020340/ENSMUSG00000096727/ENSMUSG00000028191/ENSMUSG00000003955/ENSMUSG00000070390/ENSMUSG00000025888/ENSMUSG00000039304/ENSMUSG00000078945/ENSMUSG00000030793/ENSMUSG00000020178/…	6	ENSMUSG00000078817/ENSMUSG00000015599/ENSMUSG00000071369/ENSMUSG00000020053/ENSMUSG00000025860/ENSMUSG00000020372
BP	GO:0006165	nucleoside diphosphate phosphorylation	17|1102	88|14957	0.000203277	0.00438853	ENSMUSG00000017390/ENSMUSG00000020638/ENSMUSG00000032478/ENSMUSG00000028671/ENSMUSG00000000628/ENSMUSG00000036067/ENSMUSG00000032294/ENSMUSG00000020053/ENSMUSG00000025877/ENSMUSG00000023019/ENSMUSG00000041237/ENSMUSG00000041323/ENSMUSG00000025236/ENSMUSG00000004040/ENSMUSG00000037012/ENSMUSG00000021196/ENSMUSG00000041798	Aldoc/Cmpk2/Nme6/Gale/Hk2/Slc2a6/Pkm/Igf1/Hk3/Gpd1/Pklr/Ak7/Adpgk/Stat3/Hk1/Pfkp/Gck	17	11	ENSMUSG00000017390/ENSMUSG00000020638/ENSMUSG00000028671/ENSMUSG00000000628/ENSMUSG00000036067/ENSMUSG00000032294/ENSMUSG00000025877/ENSMUSG00000041323/ENSMUSG00000004040/ENSMUSG00000037012/ENSMUSG00000021196	6	ENSMUSG00000032478/ENSMUSG00000020053/ENSMUSG00000023019/ENSMUSG00000041237/ENSMUSG00000025236/ENSMUSG00000041798
BP	GO:2000106	regulation of leukocyte apoptotic process	17|1102	88|14957	0.000203277	0.00438853	ENSMUSG00000002083/ENSMUSG00000039217/ENSMUSG00000004043/ENSMUSG00000022831/ENSMUSG00000115338/ENSMUSG00000045827/ENSMUSG00000016496/ENSMUSG00000031451/ENSMUSG00000031805/ENSMUSG00000020897/ENSMUSG00000102037/ENSMUSG00000028191/ENSMUSG00000050335/ENSMUSG00000058715/ENSMUSG00000055994/ENSMUSG00000035042/ENSMUSG00000045502	Bbc3/Il18/Stat5a/Hcls1/Pnp/Serpinb9/Cd274/Gas6/Jak3/Aurkb/Bcl2a1a/Bcl10/Lgals3/Fcer1g/Nod2/Ccl5/Hcar2	17	17	ENSMUSG00000002083/ENSMUSG00000039217/ENSMUSG00000004043/ENSMUSG00000022831/ENSMUSG00000115338/ENSMUSG00000045827/ENSMUSG00000016496/ENSMUSG00000031451/ENSMUSG00000031805/ENSMUSG00000020897/ENSMUSG00000102037/ENSMUSG00000028191/ENSMUSG00000050335/ENSMUSG00000058715/ENSMUSG00000055994/ENSMUSG00000035042/ENSMUSG00000045502	0
BP	GO:0051222	positive regulation of protein transport	49|1102	394|14957	0.000208829	0.00448938	ENSMUSG00000027808/ENSMUSG00000042333/ENSMUSG00000021948/ENSMUSG00000036908/ENSMUSG00000032883/ENSMUSG00000029915/ENSMUSG00000030865/ENSMUSG00000020122/ENSMUSG00000035914/ENSMUSG00000022575/ENSMUSG00000022831/ENSMUSG00000030774/ENSMUSG00000031934/ENSMUSG00000035385/ENSMUSG00000024789/ENSMUSG00000049044/ENSMUSG00000027995/ENSMUSG00000016496/ENSMUSG00000028874/ENSMUSG00000051439/ENSMUSG00000031451/…	Serp1/Tnfrsf14/Prkcd/Unc93b1/Acsl3/Clec5a/Chp2/Egfr/Cd276/Gsdmd/Hcls1/Pak1/Panx1/Ccl2/Jak2/Rapgef4/Tlr2/Cd274/Fgr/Cd14/Gas6/Rbp4/Ddx58/Cd2ap/Rasgrp1/Igf1/Nlrp1b/Il17rc/Aif1/Gpld1/Casp1/Ubr5/Oxct1/Nod2/Rack1/Tlr1/Hk1/Il1rap/Pycard/Lgals9/Kars/Adora2a/Arhgef5/Sec24a/Hcar2/Cyp2j6/Flna/Gck/C2cd2l	49	35	ENSMUSG00000042333/ENSMUSG00000021948/ENSMUSG00000036908/ENSMUSG00000032883/ENSMUSG00000029915/ENSMUSG00000035914/ENSMUSG00000022575/ENSMUSG00000022831/ENSMUSG00000030774/ENSMUSG00000031934/ENSMUSG00000035385/ENSMUSG00000024789/ENSMUSG00000027995/ENSMUSG00000016496/ENSMUSG00000028874/ENSMUSG00000051439/ENSMUSG00000031451/ENSMUSG00000040296/ENSMUSG00000061665/ENSMUSG00000027347/ENSMUSG00000070390/…	14	ENSMUSG00000027808/ENSMUSG00000030865/ENSMUSG00000020122/ENSMUSG00000049044/ENSMUSG00000024990/ENSMUSG00000020053/ENSMUSG00000021340/ENSMUSG00000037487/ENSMUSG00000020372/ENSMUSG00000022514/ENSMUSG00000036391/ENSMUSG00000052914/ENSMUSG00000041798/ENSMUSG00000032120
BP	GO:0032731	positive regulation of interleukin-1 beta production	11|1102	43|14957	0.000211588	0.00448981	ENSMUSG00000022575/ENSMUSG00000031934/ENSMUSG00000024789/ENSMUSG00000027995/ENSMUSG00000004951/ENSMUSG00000070390/ENSMUSG00000025888/ENSMUSG00000055994/ENSMUSG00000037012/ENSMUSG00000030793/ENSMUSG00000032688	Gsdmd/Panx1/Jak2/Tlr2/Hspb1/Nlrp1b/Casp1/Nod2/Hk1/Pycard/Malt1	11	11	ENSMUSG00000022575/ENSMUSG00000031934/ENSMUSG00000024789/ENSMUSG00000027995/ENSMUSG00000004951/ENSMUSG00000070390/ENSMUSG00000025888/ENSMUSG00000055994/ENSMUSG00000037012/ENSMUSG00000030793/ENSMUSG00000032688	0
BP	GO:0002720	positive regulation of cytokine production involved in immune response	12|1102	50|14957	0.000212374	0.00448981	ENSMUSG00000026072/ENSMUSG00000042333/ENSMUSG00000039217/ENSMUSG00000027995/ENSMUSG00000040296/ENSMUSG00000031101/ENSMUSG00000047123/ENSMUSG00000058715/ENSMUSG00000055994/ENSMUSG00000037012/ENSMUSG00000031948/ENSMUSG00000032688	Il1r1/Tnfrsf14/Il18/Tlr2/Ddx58/Sash3/Ticam1/Fcer1g/Nod2/Hk1/Kars/Malt1	12	10	ENSMUSG00000042333/ENSMUSG00000039217/ENSMUSG00000027995/ENSMUSG00000040296/ENSMUSG00000031101/ENSMUSG00000058715/ENSMUSG00000055994/ENSMUSG00000037012/ENSMUSG00000031948/ENSMUSG00000032688	2	ENSMUSG00000026072/ENSMUSG00000047123
BP	GO:0032732	positive regulation of interleukin-1 production	12|1102	50|14957	0.000212374	0.00448981	ENSMUSG00000022575/ENSMUSG00000031934/ENSMUSG00000024789/ENSMUSG00000027995/ENSMUSG00000004951/ENSMUSG00000070390/ENSMUSG00000025888/ENSMUSG00000055994/ENSMUSG00000037012/ENSMUSG00000030793/ENSMUSG00000001123/ENSMUSG00000032688	Gsdmd/Panx1/Jak2/Tlr2/Hspb1/Nlrp1b/Casp1/Nod2/Hk1/Pycard/Lgals9/Malt1	12	12	ENSMUSG00000022575/ENSMUSG00000031934/ENSMUSG00000024789/ENSMUSG00000027995/ENSMUSG00000004951/ENSMUSG00000070390/ENSMUSG00000025888/ENSMUSG00000055994/ENSMUSG00000037012/ENSMUSG00000030793/ENSMUSG00000001123/ENSMUSG00000032688	0
BP	GO:0046503	glycerolipid catabolic process	12|1102	50|14957	0.000212374	0.00448981	ENSMUSG00000022425/ENSMUSG00000030827/ENSMUSG00000032080/ENSMUSG00000032193/ENSMUSG00000003123/ENSMUSG00000032083/ENSMUSG00000032540/ENSMUSG00000007036/ENSMUSG00000021340/ENSMUSG00000011305/ENSMUSG00000032079/ENSMUSG00000042105	Enpp2/Fgf21/Apoa4/Ldlr/Lipe/Apoa1/Abhd5/Abhd16a/Gpld1/Plin5/Apoa5/Inpp5f	12	3	ENSMUSG00000032193/ENSMUSG00000003123/ENSMUSG00000007036	9	ENSMUSG00000022425/ENSMUSG00000030827/ENSMUSG00000032080/ENSMUSG00000032083/ENSMUSG00000032540/ENSMUSG00000021340/ENSMUSG00000011305/ENSMUSG00000032079/ENSMUSG00000042105
BP	GO:0005996	monosaccharide metabolic process	33|1102	233|14957	0.0002166	0.00456024	ENSMUSG00000027533/ENSMUSG00000027808/ENSMUSG00000003226/ENSMUSG00000032350/ENSMUSG00000035836/ENSMUSG00000025271/ENSMUSG00000041567/ENSMUSG00000031594/ENSMUSG00000026641/ENSMUSG00000034450/ENSMUSG00000028671/ENSMUSG00000000628/ENSMUSG00000042010/ENSMUSG00000024990/ENSMUSG00000032294/ENSMUSG00000028961/ENSMUSG00000035232/ENSMUSG00000020053/ENSMUSG00000025466/ENSMUSG00000019810/ENSMUSG00000017493/…	Fabp5/Serp1/Ranbp2/Gclc/Ugt2b1/Pfkfb1/Serpina12/Fgl1/Usf1/Gulo/Gale/Hk2/Acacb/Rbp4/Pkm/Pgd/Pdk3/Igf1/Fuom/Fuca2/Igfbp4/Gpd1/Gpld1/Mup1/Man1c1/Adpgk/Hk1/Ddb1/Pfkp/Atf3/Igfbp3/Gck/Phlda2	33	16	ENSMUSG00000032350/ENSMUSG00000031594/ENSMUSG00000026641/ENSMUSG00000028671/ENSMUSG00000000628/ENSMUSG00000042010/ENSMUSG00000032294/ENSMUSG00000028961/ENSMUSG00000035232/ENSMUSG00000025466/ENSMUSG00000019810/ENSMUSG00000037306/ENSMUSG00000037012/ENSMUSG00000021196/ENSMUSG00000026628/ENSMUSG00000010760	17	ENSMUSG00000027533/ENSMUSG00000027808/ENSMUSG00000003226/ENSMUSG00000035836/ENSMUSG00000025271/ENSMUSG00000041567/ENSMUSG00000034450/ENSMUSG00000024990/ENSMUSG00000020053/ENSMUSG00000017493/ENSMUSG00000023019/ENSMUSG00000021340/ENSMUSG00000078683/ENSMUSG00000025236/ENSMUSG00000024740/ENSMUSG00000020427/ENSMUSG00000041798
BP	GO:0033559	unsaturated fatty acid metabolic process	17|1102	89|14957	0.000234329	0.00491319	ENSMUSG00000003053/ENSMUSG00000027533/ENSMUSG00000042248/ENSMUSG00000055782/ENSMUSG00000060613/ENSMUSG00000062624/ENSMUSG00000060407/ENSMUSG00000025203/ENSMUSG00000037071/ENSMUSG00000054827/ENSMUSG00000031378/ENSMUSG00000030341/ENSMUSG00000025002/ENSMUSG00000007036/ENSMUSG00000030483/ENSMUSG00000074882/ENSMUSG00000052914	Cyp2c29/Fabp5/Cyp2c37/Abcd2/Cyp2c70/Cyp2c67/Cyp2a12/Scd2/Scd1/Cyp2c50/Abcd1/Tnfrsf1a/Cyp2c55/Abhd16a/Cyp2b10/Cyp2c68/Cyp2j6	17	11	ENSMUSG00000003053/ENSMUSG00000042248/ENSMUSG00000055782/ENSMUSG00000025203/ENSMUSG00000037071/ENSMUSG00000054827/ENSMUSG00000031378/ENSMUSG00000030341/ENSMUSG00000025002/ENSMUSG00000007036/ENSMUSG00000030483	6	ENSMUSG00000027533/ENSMUSG00000060613/ENSMUSG00000062624/ENSMUSG00000060407/ENSMUSG00000074882/ENSMUSG00000052914
BP	GO:0055092	sterol homeostasis	16|1102	81|14957	0.000237199	0.00495298	ENSMUSG00000045294/ENSMUSG00000032080/ENSMUSG00000032193/ENSMUSG00000039217/ENSMUSG00000044254/ENSMUSG00000032083/ENSMUSG00000023022/ENSMUSG00000031378/ENSMUSG00000015243/ENSMUSG00000037278/ENSMUSG00000032114/ENSMUSG00000028553/ENSMUSG00000028158/ENSMUSG00000039519/ENSMUSG00000032079/ENSMUSG00000036391	Insig1/Apoa4/Ldlr/Il18/Pcsk9/Apoa1/Lima1/Abcd1/Abca1/Tmem97/Slc37a4/Angptl3/Mttp/Cyp7b1/Apoa5/Sec24a	16	7	ENSMUSG00000045294/ENSMUSG00000032193/ENSMUSG00000039217/ENSMUSG00000044254/ENSMUSG00000023022/ENSMUSG00000031378/ENSMUSG00000037278	9	ENSMUSG00000032080/ENSMUSG00000032083/ENSMUSG00000015243/ENSMUSG00000032114/ENSMUSG00000028553/ENSMUSG00000028158/ENSMUSG00000039519/ENSMUSG00000032079/ENSMUSG00000036391
BP	GO:0015914	phospholipid transport	13|1102	58|14957	0.000244266	0.00507975	ENSMUSG00000074345/ENSMUSG00000017754/ENSMUSG00000021948/ENSMUSG00000032080/ENSMUSG00000032193/ENSMUSG00000024851/ENSMUSG00000032083/ENSMUSG00000023088/ENSMUSG00000015243/ENSMUSG00000028603/ENSMUSG00000027546/ENSMUSG00000028158/ENSMUSG00000032079	Tnfaip8l3/Pltp/Prkcd/Apoa4/Ldlr/Pitpnm1/Apoa1/Abcc1/Abca1/Scp2/Atp9a/Mttp/Apoa5	13	5	ENSMUSG00000074345/ENSMUSG00000021948/ENSMUSG00000032193/ENSMUSG00000024851/ENSMUSG00000023088	8	ENSMUSG00000017754/ENSMUSG00000032080/ENSMUSG00000032083/ENSMUSG00000015243/ENSMUSG00000028603/ENSMUSG00000027546/ENSMUSG00000028158/ENSMUSG00000032079
BP	GO:0009108	coenzyme biosynthetic process	27|1102	178|14957	0.000260005	0.00538507	ENSMUSG00000017390/ENSMUSG00000039616/ENSMUSG00000015806/ENSMUSG00000020917/ENSMUSG00000037847/ENSMUSG00000034450/ENSMUSG00000028671/ENSMUSG00000000628/ENSMUSG00000042010/ENSMUSG00000032047/ENSMUSG00000018796/ENSMUSG00000036067/ENSMUSG00000032294/ENSMUSG00000035232/ENSMUSG00000020053/ENSMUSG00000025877/ENSMUSG00000023019/ENSMUSG00000041237/ENSMUSG00000003762/ENSMUSG00000027605/ENSMUSG00000025236/…	Aldoc/Mocos/Qdpr/Acly/Nmrk1/Gulo/Gale/Hk2/Acacb/Acat1/Acsl1/Slc2a6/Pkm/Pdk3/Igf1/Hk3/Gpd1/Pklr/Coq8b/Acss2/Adpgk/Stat3/Pank4/Hk1/Pfkp/Gch1/Gck	27	17	ENSMUSG00000017390/ENSMUSG00000039616/ENSMUSG00000015806/ENSMUSG00000020917/ENSMUSG00000028671/ENSMUSG00000000628/ENSMUSG00000042010/ENSMUSG00000036067/ENSMUSG00000032294/ENSMUSG00000035232/ENSMUSG00000025877/ENSMUSG00000003762/ENSMUSG00000027605/ENSMUSG00000004040/ENSMUSG00000037012/ENSMUSG00000021196/ENSMUSG00000037580	10	ENSMUSG00000037847/ENSMUSG00000034450/ENSMUSG00000032047/ENSMUSG00000018796/ENSMUSG00000020053/ENSMUSG00000023019/ENSMUSG00000041237/ENSMUSG00000025236/ENSMUSG00000029056/ENSMUSG00000041798
BP	GO:0042738	exogenous drug catabolic process	11|1102	44|14957	0.000263557	0.00541839	ENSMUSG00000003053/ENSMUSG00000042248/ENSMUSG00000060613/ENSMUSG00000062624/ENSMUSG00000060407/ENSMUSG00000054827/ENSMUSG00000025002/ENSMUSG00000030483/ENSMUSG00000074882/ENSMUSG00000030670/ENSMUSG00000052914	Cyp2c29/Cyp2c37/Cyp2c70/Cyp2c67/Cyp2a12/Cyp2c50/Cyp2c55/Cyp2b10/Cyp2c68/Cyp2r1/Cyp2j6	11	6	ENSMUSG00000003053/ENSMUSG00000042248/ENSMUSG00000054827/ENSMUSG00000025002/ENSMUSG00000030483/ENSMUSG00000030670	5	ENSMUSG00000060613/ENSMUSG00000062624/ENSMUSG00000060407/ENSMUSG00000074882/ENSMUSG00000052914
BP	GO:0006919	activation of cysteine-type endopeptidase activity involved in apoptotic process	14|1102	66|14957	0.000264274	0.00541839	ENSMUSG00000002083/ENSMUSG00000036986/ENSMUSG00000057789/ENSMUSG00000026104/ENSMUSG00000024789/ENSMUSG00000025887/ENSMUSG00000056071/ENSMUSG00000028191/ENSMUSG00000003955/ENSMUSG00000070390/ENSMUSG00000025888/ENSMUSG00000020372/ENSMUSG00000030793/ENSMUSG00000039193	Bbc3/Pml/Bak1/Stat1/Jak2/Casp12/S100a9/Bcl10/Fam162a/Nlrp1b/Casp1/Rack1/Pycard/Nlrc4	14	13	ENSMUSG00000002083/ENSMUSG00000036986/ENSMUSG00000057789/ENSMUSG00000026104/ENSMUSG00000024789/ENSMUSG00000025887/ENSMUSG00000056071/ENSMUSG00000028191/ENSMUSG00000003955/ENSMUSG00000070390/ENSMUSG00000025888/ENSMUSG00000030793/ENSMUSG00000039193	1	ENSMUSG00000020372
BP	GO:0042178	xenobiotic catabolic process	7|1102	19|14957	0.000264805	0.00541839	ENSMUSG00000035836/ENSMUSG00000058135/ENSMUSG00000058216/ENSMUSG00000068762/ENSMUSG00000018796/ENSMUSG00000038155/ENSMUSG00000027890	Ugt2b1/Gstm1/Gstp3/Gstm6/Acsl1/Gstp2/Gstm4	7	4	ENSMUSG00000058135/ENSMUSG00000068762/ENSMUSG00000038155/ENSMUSG00000027890	3	ENSMUSG00000035836/ENSMUSG00000058216/ENSMUSG00000018796
BP	GO:0035710	CD4-positive, alpha-beta T cell activation	17|1102	90|14957	0.000269424	0.00546899	ENSMUSG00000001750/ENSMUSG00000049103/ENSMUSG00000039217/ENSMUSG00000038037/ENSMUSG00000028064/ENSMUSG00000002983/ENSMUSG00000018899/ENSMUSG00000051457/ENSMUSG00000053175/ENSMUSG00000016496/ENSMUSG00000031805/ENSMUSG00000031101/ENSMUSG00000002413/ENSMUSG00000004040/ENSMUSG00000044701/ENSMUSG00000001123/ENSMUSG00000032688	Tcirg1/Ccr2/Il18/Socs1/Sema4a/Relb/Irf1/Spn/Bcl3/Cd274/Jak3/Sash3/Braf/Stat3/Il27/Lgals9/Malt1	17	16	ENSMUSG00000001750/ENSMUSG00000049103/ENSMUSG00000039217/ENSMUSG00000038037/ENSMUSG00000028064/ENSMUSG00000002983/ENSMUSG00000018899/ENSMUSG00000051457/ENSMUSG00000053175/ENSMUSG00000016496/ENSMUSG00000031805/ENSMUSG00000031101/ENSMUSG00000004040/ENSMUSG00000044701/ENSMUSG00000001123/ENSMUSG00000032688	1	ENSMUSG00000002413
BP	GO:0046939	nucleotide phosphorylation	17|1102	90|14957	0.000269424	0.00546899	ENSMUSG00000017390/ENSMUSG00000020638/ENSMUSG00000032478/ENSMUSG00000028671/ENSMUSG00000000628/ENSMUSG00000036067/ENSMUSG00000032294/ENSMUSG00000020053/ENSMUSG00000025877/ENSMUSG00000023019/ENSMUSG00000041237/ENSMUSG00000041323/ENSMUSG00000025236/ENSMUSG00000004040/ENSMUSG00000037012/ENSMUSG00000021196/ENSMUSG00000041798	Aldoc/Cmpk2/Nme6/Gale/Hk2/Slc2a6/Pkm/Igf1/Hk3/Gpd1/Pklr/Ak7/Adpgk/Stat3/Hk1/Pfkp/Gck	17	11	ENSMUSG00000017390/ENSMUSG00000020638/ENSMUSG00000028671/ENSMUSG00000000628/ENSMUSG00000036067/ENSMUSG00000032294/ENSMUSG00000025877/ENSMUSG00000041323/ENSMUSG00000004040/ENSMUSG00000037012/ENSMUSG00000021196	6	ENSMUSG00000032478/ENSMUSG00000020053/ENSMUSG00000023019/ENSMUSG00000041237/ENSMUSG00000025236/ENSMUSG00000041798
BP	GO:1903901	negative regulation of viral life cycle	15|1102	74|14957	0.000273834	0.00553645	ENSMUSG00000046718/ENSMUSG00000025492/ENSMUSG00000036986/ENSMUSG00000052776/ENSMUSG00000026542/ENSMUSG00000009585/ENSMUSG00000029561/ENSMUSG00000010175/ENSMUSG00000035692/ENSMUSG00000060591/ENSMUSG00000029826/ENSMUSG00000063268/ENSMUSG00000032369/ENSMUSG00000035042/ENSMUSG00000032661	Bst2/Ifitm3/Pml/Oas1a/Apcs/Apobec3/Oasl2/Prox1/Isg15/Ifitm2/Zc3hav1/Parp10/Plscr1/Ccl5/Oas3	15	14	ENSMUSG00000046718/ENSMUSG00000025492/ENSMUSG00000036986/ENSMUSG00000052776/ENSMUSG00000026542/ENSMUSG00000009585/ENSMUSG00000029561/ENSMUSG00000035692/ENSMUSG00000060591/ENSMUSG00000029826/ENSMUSG00000063268/ENSMUSG00000032369/ENSMUSG00000035042/ENSMUSG00000032661	1	ENSMUSG00000010175
BP	GO:0006986	response to unfolded protein	19|1102	107|14957	0.000278559	0.00556885	ENSMUSG00000027808/ENSMUSG00000057789/ENSMUSG00000032932/ENSMUSG00000055401/ENSMUSG00000090877/ENSMUSG00000014905/ENSMUSG00000025887/ENSMUSG00000091971/ENSMUSG00000004951/ENSMUSG00000027230/ENSMUSG00000024807/ENSMUSG00000039474/ENSMUSG00000052271/ENSMUSG00000020715/ENSMUSG00000022136/ENSMUSG00000043019/ENSMUSG00000021270/ENSMUSG00000026628/ENSMUSG00000020571	Serp1/Bak1/Hspa13/Fbxo6/Hspa1b/Dnajb9/Casp12/Hspa1a/Hspb1/Creb3l1/Syvn1/Wfs1/Bhlha15/Ern1/Dnajc3/Edem3/Hsp90aa1/Atf3/Pdia6	19	9	ENSMUSG00000057789/ENSMUSG00000055401/ENSMUSG00000090877/ENSMUSG00000025887/ENSMUSG00000091971/ENSMUSG00000004951/ENSMUSG00000027230/ENSMUSG00000021270/ENSMUSG00000026628	10	ENSMUSG00000027808/ENSMUSG00000032932/ENSMUSG00000014905/ENSMUSG00000024807/ENSMUSG00000039474/ENSMUSG00000052271/ENSMUSG00000020715/ENSMUSG00000022136/ENSMUSG00000043019/ENSMUSG00000020571
BP	GO:0071887	leukocyte apoptotic process	19|1102	107|14957	0.000278559	0.00556885	ENSMUSG00000002083/ENSMUSG00000057789/ENSMUSG00000039217/ENSMUSG00000004043/ENSMUSG00000022831/ENSMUSG00000024778/ENSMUSG00000115338/ENSMUSG00000045827/ENSMUSG00000016496/ENSMUSG00000031451/ENSMUSG00000031805/ENSMUSG00000020897/ENSMUSG00000102037/ENSMUSG00000028191/ENSMUSG00000050335/ENSMUSG00000058715/ENSMUSG00000055994/ENSMUSG00000035042/ENSMUSG00000045502	Bbc3/Bak1/Il18/Stat5a/Hcls1/Fas/Pnp/Serpinb9/Cd274/Gas6/Jak3/Aurkb/Bcl2a1a/Bcl10/Lgals3/Fcer1g/Nod2/Ccl5/Hcar2	19	19	ENSMUSG00000002083/ENSMUSG00000057789/ENSMUSG00000039217/ENSMUSG00000004043/ENSMUSG00000022831/ENSMUSG00000024778/ENSMUSG00000115338/ENSMUSG00000045827/ENSMUSG00000016496/ENSMUSG00000031451/ENSMUSG00000031805/ENSMUSG00000020897/ENSMUSG00000102037/ENSMUSG00000028191/ENSMUSG00000050335/ENSMUSG00000058715/ENSMUSG00000055994/ENSMUSG00000035042/ENSMUSG00000045502	0
BP	GO:0042095	interferon-gamma biosynthetic process	6|1102	14|14957	0.000282973	0.00556885	ENSMUSG00000039217/ENSMUSG00000035914/ENSMUSG00000028076/ENSMUSG00000031639/ENSMUSG00000044701/ENSMUSG00000044583	Il18/Cd276/Cd1d1/Tlr3/Il27/Tlr7	6	5	ENSMUSG00000039217/ENSMUSG00000035914/ENSMUSG00000028076/ENSMUSG00000031639/ENSMUSG00000044701	1	ENSMUSG00000044583
BP	GO:0060330	regulation of response to interferon-gamma	6|1102	14|14957	0.000282973	0.00556885	ENSMUSG00000030895/ENSMUSG00000074151/ENSMUSG00000069874/ENSMUSG00000034422/ENSMUSG00000038037/ENSMUSG00000046879	Hpx/Nlrc5/Irgm2/Parp14/Socs1/Irgm1	6	6	ENSMUSG00000030895/ENSMUSG00000074151/ENSMUSG00000069874/ENSMUSG00000034422/ENSMUSG00000038037/ENSMUSG00000046879	0
BP	GO:0060334	regulation of interferon-gamma-mediated signaling pathway	6|1102	14|14957	0.000282973	0.00556885	ENSMUSG00000030895/ENSMUSG00000074151/ENSMUSG00000069874/ENSMUSG00000034422/ENSMUSG00000038037/ENSMUSG00000046879	Hpx/Nlrc5/Irgm2/Parp14/Socs1/Irgm1	6	6	ENSMUSG00000030895/ENSMUSG00000074151/ENSMUSG00000069874/ENSMUSG00000034422/ENSMUSG00000038037/ENSMUSG00000046879	0
BP	GO:0098856	intestinal lipid absorption	6|1102	14|14957	0.000282973	0.00556885	ENSMUSG00000032080/ENSMUSG00000032193/ENSMUSG00000032083/ENSMUSG00000023022/ENSMUSG00000032079/ENSMUSG00000023832	Apoa4/Ldlr/Apoa1/Lima1/Apoa5/Acat2	6	3	ENSMUSG00000032193/ENSMUSG00000023022/ENSMUSG00000023832	3	ENSMUSG00000032080/ENSMUSG00000032083/ENSMUSG00000032079
BP	GO:0071827	plasma lipoprotein particle organization	9|1102	31|14957	0.000283088	0.00556885	ENSMUSG00000017754/ENSMUSG00000032080/ENSMUSG00000032883/ENSMUSG00000057074/ENSMUSG00000032083/ENSMUSG00000015243/ENSMUSG00000023913/ENSMUSG00000028158/ENSMUSG00000032079	Pltp/Apoa4/Acsl3/Ces1g/Apoa1/Abca1/Pla2g7/Mttp/Apoa5	9	2	ENSMUSG00000032883/ENSMUSG00000057074	7	ENSMUSG00000017754/ENSMUSG00000032080/ENSMUSG00000032083/ENSMUSG00000015243/ENSMUSG00000023913/ENSMUSG00000028158/ENSMUSG00000032079
BP	GO:0007260	tyrosine phosphorylation of STAT protein	13|1102	59|14957	0.000292474	0.00566849	ENSMUSG00000030895/ENSMUSG00000034422/ENSMUSG00000039217/ENSMUSG00000038037/ENSMUSG00000022831/ENSMUSG00000018899/ENSMUSG00000024789/ENSMUSG00000030341/ENSMUSG00000031805/ENSMUSG00000020053/ENSMUSG00000035042/ENSMUSG00000034292/ENSMUSG00000042105	Hpx/Parp14/Il18/Socs1/Hcls1/Irf1/Jak2/Tnfrsf1a/Jak3/Igf1/Ccl5/Traf3ip1/Inpp5f	13	10	ENSMUSG00000030895/ENSMUSG00000034422/ENSMUSG00000039217/ENSMUSG00000038037/ENSMUSG00000022831/ENSMUSG00000018899/ENSMUSG00000024789/ENSMUSG00000030341/ENSMUSG00000031805/ENSMUSG00000035042	3	ENSMUSG00000020053/ENSMUSG00000034292/ENSMUSG00000042105
BP	GO:0032722	positive regulation of chemokine production	13|1102	59|14957	0.000292474	0.00566849	ENSMUSG00000039217/ENSMUSG00000016024/ENSMUSG00000027995/ENSMUSG00000040329/ENSMUSG00000047123/ENSMUSG00000032508/ENSMUSG00000024397/ENSMUSG00000031639/ENSMUSG00000055994/ENSMUSG00000035042/ENSMUSG00000030793/ENSMUSG00000001123/ENSMUSG00000044583	Il18/Lbp/Tlr2/Il7/Ticam1/Myd88/Aif1/Tlr3/Nod2/Ccl5/Pycard/Lgals9/Tlr7	13	11	ENSMUSG00000039217/ENSMUSG00000016024/ENSMUSG00000027995/ENSMUSG00000040329/ENSMUSG00000032508/ENSMUSG00000024397/ENSMUSG00000031639/ENSMUSG00000055994/ENSMUSG00000035042/ENSMUSG00000030793/ENSMUSG00000001123	2	ENSMUSG00000047123/ENSMUSG00000044583
BP	GO:0070059	intrinsic apoptotic signaling pathway in response to endoplasmic reticulum stress	13|1102	59|14957	0.000292474	0.00566849	ENSMUSG00000031628/ENSMUSG00000002083/ENSMUSG00000036986/ENSMUSG00000057789/ENSMUSG00000025887/ENSMUSG00000071369/ENSMUSG00000027230/ENSMUSG00000022564/ENSMUSG00000032115/ENSMUSG00000024807/ENSMUSG00000039474/ENSMUSG00000020715/ENSMUSG00000027006	Casp3/Bbc3/Pml/Bak1/Casp12/Map3k5/Creb3l1/Grina/Hyou1/Syvn1/Wfs1/Ern1/Dnajc10	13	8	ENSMUSG00000031628/ENSMUSG00000002083/ENSMUSG00000036986/ENSMUSG00000057789/ENSMUSG00000025887/ENSMUSG00000027230/ENSMUSG00000022564/ENSMUSG00000027006	5	ENSMUSG00000071369/ENSMUSG00000032115/ENSMUSG00000024807/ENSMUSG00000039474/ENSMUSG00000020715
BP	GO:0060759	regulation of response to cytokine stimulus	20|1102	116|14957	0.000292603	0.00566849	ENSMUSG00000025498/ENSMUSG00000030895/ENSMUSG00000074151/ENSMUSG00000026072/ENSMUSG00000069874/ENSMUSG00000034422/ENSMUSG00000038037/ENSMUSG00000027514/ENSMUSG00000025494/ENSMUSG00000032083/ENSMUSG00000046879/ENSMUSG00000027995/ENSMUSG00000031451/ENSMUSG00000040296/ENSMUSG00000040329/ENSMUSG00000025888/ENSMUSG00000030793/ENSMUSG00000026981/ENSMUSG00000020115/ENSMUSG00000029254	Irf7/Hpx/Nlrc5/Il1r1/Irgm2/Parp14/Socs1/Zbp1/Sigirr/Apoa1/Irgm1/Tlr2/Gas6/Ddx58/Il7/Casp1/Pycard/Il1rn/Tbk1/Stap1	20	17	ENSMUSG00000025498/ENSMUSG00000030895/ENSMUSG00000074151/ENSMUSG00000069874/ENSMUSG00000034422/ENSMUSG00000038037/ENSMUSG00000027514/ENSMUSG00000025494/ENSMUSG00000046879/ENSMUSG00000027995/ENSMUSG00000031451/ENSMUSG00000040296/ENSMUSG00000040329/ENSMUSG00000025888/ENSMUSG00000030793/ENSMUSG00000026981/ENSMUSG00000020115	3	ENSMUSG00000026072/ENSMUSG00000032083/ENSMUSG00000029254
BP	GO:0002703	regulation of leukocyte mediated immunity	30|1102	208|14957	0.00029974	0.00578476	ENSMUSG00000030895/ENSMUSG00000067235/ENSMUSG00000026072/ENSMUSG00000049103/ENSMUSG00000039217/ENSMUSG00000023249/ENSMUSG00000015947/ENSMUSG00000004043/ENSMUSG00000051457/ENSMUSG00000037321/ENSMUSG00000041471/ENSMUSG00000115338/ENSMUSG00000027995/ENSMUSG00000045827/ENSMUSG00000028874/ENSMUSG00000030157/ENSMUSG00000040296/ENSMUSG00000028076/ENSMUSG00000031805/ENSMUSG00000031101/ENSMUSG00000000290/…	Hpx/H2-Q10/Il1r1/Ccr2/Il18/Parp3/Fcgr1/Stat5a/Spn/Tap1/Shld2/Pnp/Tlr2/Serpinb9/Fgr/Clec2d/Ddx58/Cd1d1/Jak3/Sash3/Itgb2/Rasgrp1/Ticam1/Tlr3/Fcer1g/Rac2/Nod2/Lgals9/Ulbp1/Malt1	30	27	ENSMUSG00000030895/ENSMUSG00000067235/ENSMUSG00000049103/ENSMUSG00000039217/ENSMUSG00000023249/ENSMUSG00000015947/ENSMUSG00000004043/ENSMUSG00000051457/ENSMUSG00000037321/ENSMUSG00000115338/ENSMUSG00000027995/ENSMUSG00000045827/ENSMUSG00000028874/ENSMUSG00000030157/ENSMUSG00000040296/ENSMUSG00000028076/ENSMUSG00000031805/ENSMUSG00000031101/ENSMUSG00000000290/ENSMUSG00000027347/ENSMUSG00000031639/…	3	ENSMUSG00000026072/ENSMUSG00000041471/ENSMUSG00000047123
BP	GO:0032642	regulation of chemokine production	16|1102	83|14957	0.000317658	0.00608446	ENSMUSG00000039217/ENSMUSG00000016024/ENSMUSG00000025494/ENSMUSG00000027995/ENSMUSG00000040329/ENSMUSG00000032114/ENSMUSG00000047123/ENSMUSG00000037902/ENSMUSG00000032508/ENSMUSG00000024397/ENSMUSG00000031639/ENSMUSG00000055994/ENSMUSG00000035042/ENSMUSG00000030793/ENSMUSG00000001123/ENSMUSG00000044583	Il18/Lbp/Sigirr/Tlr2/Il7/Slc37a4/Ticam1/Sirpa/Myd88/Aif1/Tlr3/Nod2/Ccl5/Pycard/Lgals9/Tlr7	16	13	ENSMUSG00000039217/ENSMUSG00000016024/ENSMUSG00000025494/ENSMUSG00000027995/ENSMUSG00000040329/ENSMUSG00000037902/ENSMUSG00000032508/ENSMUSG00000024397/ENSMUSG00000031639/ENSMUSG00000055994/ENSMUSG00000035042/ENSMUSG00000030793/ENSMUSG00000001123	3	ENSMUSG00000032114/ENSMUSG00000047123/ENSMUSG00000044583
BP	GO:0072676	lymphocyte migration	16|1102	83|14957	0.000317658	0.00608446	ENSMUSG00000042333/ENSMUSG00000049103/ENSMUSG00000037405/ENSMUSG00000027009/ENSMUSG00000051457/ENSMUSG00000035385/ENSMUSG00000031207/ENSMUSG00000031451/ENSMUSG00000034855/ENSMUSG00000024397/ENSMUSG00000020437/ENSMUSG00000039519/ENSMUSG00000035042/ENSMUSG00000030793/ENSMUSG00000001123/ENSMUSG00000032754	Tnfrsf14/Ccr2/Icam1/Itga4/Spn/Ccl2/Msn/Gas6/Cxcl10/Aif1/Myo1g/Cyp7b1/Ccl5/Pycard/Lgals9/Slc8b1	16	15	ENSMUSG00000042333/ENSMUSG00000049103/ENSMUSG00000037405/ENSMUSG00000027009/ENSMUSG00000051457/ENSMUSG00000035385/ENSMUSG00000031207/ENSMUSG00000031451/ENSMUSG00000034855/ENSMUSG00000024397/ENSMUSG00000020437/ENSMUSG00000035042/ENSMUSG00000030793/ENSMUSG00000001123/ENSMUSG00000032754	1	ENSMUSG00000039519
BP	GO:0072593	reactive oxygen species metabolic process	35|1102	258|14957	0.000328242	0.00626365	ENSMUSG00000031722/ENSMUSG00000022126/ENSMUSG00000055782/ENSMUSG00000020826/ENSMUSG00000021948/ENSMUSG00000037405/ENSMUSG00000032080/ENSMUSG00000068452/ENSMUSG00000039217/ENSMUSG00000020122/ENSMUSG00000044005/ENSMUSG00000052270/ENSMUSG00000024789/ENSMUSG00000000628/ENSMUSG00000027995/ENSMUSG00000032000/ENSMUSG00000031378/ENSMUSG00000064354/ENSMUSG00000000290/ENSMUSG00000035232/ENSMUSG00000055447/…	Hp/Acod1/Abcd2/Nos2/Prkcd/Icam1/Apoa4/Duox2/Il18/Egfr/Gls2/Fpr2/Jak2/Hk2/Tlr2/Birc3/Abcd1/mt-Co2/Itgb2/Pdk3/Cd47/Igf1/Ticam1/Sirpa/Aif1/Gnai2/Gla/Plin5/Stat3/Hsp90aa1/Ulbp1/Gch1/Atpif1/F2/Hbb-bs	35	29	ENSMUSG00000031722/ENSMUSG00000022126/ENSMUSG00000055782/ENSMUSG00000020826/ENSMUSG00000021948/ENSMUSG00000037405/ENSMUSG00000068452/ENSMUSG00000039217/ENSMUSG00000044005/ENSMUSG00000052270/ENSMUSG00000024789/ENSMUSG00000000628/ENSMUSG00000027995/ENSMUSG00000032000/ENSMUSG00000031378/ENSMUSG00000064354/ENSMUSG00000000290/ENSMUSG00000035232/ENSMUSG00000055447/ENSMUSG00000037902/ENSMUSG00000024397/…	6	ENSMUSG00000032080/ENSMUSG00000020122/ENSMUSG00000020053/ENSMUSG00000047123/ENSMUSG00000011305/ENSMUSG00000027249
BP	GO:0043901	negative regulation of multi-organism process	23|1102	144|14957	0.000341158	0.00645683	ENSMUSG00000046718/ENSMUSG00000022126/ENSMUSG00000025492/ENSMUSG00000036986/ENSMUSG00000052776/ENSMUSG00000026542/ENSMUSG00000032231/ENSMUSG00000030220/ENSMUSG00000009585/ENSMUSG00000026104/ENSMUSG00000029561/ENSMUSG00000010175/ENSMUSG00000017830/ENSMUSG00000035692/ENSMUSG00000060591/ENSMUSG00000029826/ENSMUSG00000020053/ENSMUSG00000063268/ENSMUSG00000032369/ENSMUSG00000035042/ENSMUSG00000032661/…	Bst2/Acod1/Ifitm3/Pml/Oas1a/Apcs/Anxa2/Arhgdib/Apobec3/Stat1/Oasl2/Prox1/Dhx58/Isg15/Ifitm2/Zc3hav1/Igf1/Parp10/Plscr1/Ccl5/Oas3/Traf3ip1/Tnfaip3	23	20	ENSMUSG00000046718/ENSMUSG00000022126/ENSMUSG00000025492/ENSMUSG00000036986/ENSMUSG00000052776/ENSMUSG00000026542/ENSMUSG00000032231/ENSMUSG00000030220/ENSMUSG00000009585/ENSMUSG00000026104/ENSMUSG00000029561/ENSMUSG00000017830/ENSMUSG00000035692/ENSMUSG00000060591/ENSMUSG00000029826/ENSMUSG00000063268/ENSMUSG00000032369/ENSMUSG00000035042/ENSMUSG00000032661/ENSMUSG00000019850	3	ENSMUSG00000010175/ENSMUSG00000020053/ENSMUSG00000034292
BP	GO:0030522	intracellular receptor signaling pathway	27|1102	181|14957	0.000342168	0.00645683	ENSMUSG00000046688/ENSMUSG00000027533/ENSMUSG00000055254/ENSMUSG00000069874/ENSMUSG00000036986/ENSMUSG00000030774/ENSMUSG00000024789/ENSMUSG00000017830/ENSMUSG00000040296/ENSMUSG00000026610/ENSMUSG00000040359/ENSMUSG00000035232/ENSMUSG00000029826/ENSMUSG00000020053/ENSMUSG00000020954/ENSMUSG00000011305/ENSMUSG00000018965/ENSMUSG00000037487/ENSMUSG00000037921/ENSMUSG00000055994/ENSMUSG00000039519/…	Tifa/Fabp5/Ntrk2/Irgm2/Pml/Pak1/Jak2/Dhx58/Ddx58/Esrrg/Ufl1/Pdk3/Zc3hav1/Igf1/Strn3/Plin5/Ywhah/Ubr5/Ddx60/Nod2/Cyp7b1/Stat3/Trim68/Cyp2j6/Tnfaip3/Ncor2/Zfp366	27	16	ENSMUSG00000046688/ENSMUSG00000069874/ENSMUSG00000036986/ENSMUSG00000030774/ENSMUSG00000024789/ENSMUSG00000017830/ENSMUSG00000040296/ENSMUSG00000035232/ENSMUSG00000029826/ENSMUSG00000018965/ENSMUSG00000037921/ENSMUSG00000055994/ENSMUSG00000004040/ENSMUSG00000073968/ENSMUSG00000019850/ENSMUSG00000050919	11	ENSMUSG00000027533/ENSMUSG00000055254/ENSMUSG00000026610/ENSMUSG00000040359/ENSMUSG00000020053/ENSMUSG00000020954/ENSMUSG00000011305/ENSMUSG00000037487/ENSMUSG00000039519/ENSMUSG00000052914/ENSMUSG00000029478
BP	GO:0043281	regulation of cysteine-type endopeptidase activity involved in apoptotic process	27|1102	181|14957	0.000342168	0.00645683	ENSMUSG00000078817/ENSMUSG00000002083/ENSMUSG00000036986/ENSMUSG00000057789/ENSMUSG00000026104/ENSMUSG00000090877/ENSMUSG00000024778/ENSMUSG00000024789/ENSMUSG00000032000/ENSMUSG00000025887/ENSMUSG00000031451/ENSMUSG00000056071/ENSMUSG00000071369/ENSMUSG00000028191/ENSMUSG00000020053/ENSMUSG00000003955/ENSMUSG00000070390/ENSMUSG00000025888/ENSMUSG00000025860/ENSMUSG00000039304/ENSMUSG00000020372/…	Nlrp12/Bbc3/Pml/Bak1/Stat1/Hspa1b/Fas/Jak2/Birc3/Casp12/Gas6/S100a9/Map3k5/Bcl10/Igf1/Fam162a/Nlrp1b/Casp1/Xiap/Tnfsf10/Rack1/Naip2/Pycard/Adora2a/Nlrc4/Malt1/Rps6ka1	27	22	ENSMUSG00000002083/ENSMUSG00000036986/ENSMUSG00000057789/ENSMUSG00000026104/ENSMUSG00000090877/ENSMUSG00000024778/ENSMUSG00000024789/ENSMUSG00000032000/ENSMUSG00000025887/ENSMUSG00000031451/ENSMUSG00000056071/ENSMUSG00000028191/ENSMUSG00000003955/ENSMUSG00000070390/ENSMUSG00000025888/ENSMUSG00000039304/ENSMUSG00000078945/ENSMUSG00000030793/ENSMUSG00000020178/ENSMUSG00000039193/ENSMUSG00000032688/…	5	ENSMUSG00000078817/ENSMUSG00000071369/ENSMUSG00000020053/ENSMUSG00000025860/ENSMUSG00000020372
BP	GO:1904951	positive regulation of establishment of protein localization	50|1102	413|14957	0.000344195	0.00647111	ENSMUSG00000027808/ENSMUSG00000002083/ENSMUSG00000042333/ENSMUSG00000021948/ENSMUSG00000036908/ENSMUSG00000032883/ENSMUSG00000029915/ENSMUSG00000030865/ENSMUSG00000020122/ENSMUSG00000035914/ENSMUSG00000022575/ENSMUSG00000022831/ENSMUSG00000030774/ENSMUSG00000031934/ENSMUSG00000035385/ENSMUSG00000024789/ENSMUSG00000049044/ENSMUSG00000027995/ENSMUSG00000016496/ENSMUSG00000028874/ENSMUSG00000051439/…	Serp1/Bbc3/Tnfrsf14/Prkcd/Unc93b1/Acsl3/Clec5a/Chp2/Egfr/Cd276/Gsdmd/Hcls1/Pak1/Panx1/Ccl2/Jak2/Rapgef4/Tlr2/Cd274/Fgr/Cd14/Gas6/Rbp4/Ddx58/Cd2ap/Rasgrp1/Igf1/Nlrp1b/Il17rc/Aif1/Gpld1/Casp1/Ubr5/Oxct1/Nod2/Rack1/Tlr1/Hk1/Il1rap/Pycard/Lgals9/Kars/Adora2a/Arhgef5/Sec24a/Hcar2/Cyp2j6/Flna/Gck/C2cd2l	50	36	ENSMUSG00000002083/ENSMUSG00000042333/ENSMUSG00000021948/ENSMUSG00000036908/ENSMUSG00000032883/ENSMUSG00000029915/ENSMUSG00000035914/ENSMUSG00000022575/ENSMUSG00000022831/ENSMUSG00000030774/ENSMUSG00000031934/ENSMUSG00000035385/ENSMUSG00000024789/ENSMUSG00000027995/ENSMUSG00000016496/ENSMUSG00000028874/ENSMUSG00000051439/ENSMUSG00000031451/ENSMUSG00000040296/ENSMUSG00000061665/ENSMUSG00000027347/…	14	ENSMUSG00000027808/ENSMUSG00000030865/ENSMUSG00000020122/ENSMUSG00000049044/ENSMUSG00000024990/ENSMUSG00000020053/ENSMUSG00000021340/ENSMUSG00000037487/ENSMUSG00000020372/ENSMUSG00000022514/ENSMUSG00000036391/ENSMUSG00000052914/ENSMUSG00000041798/ENSMUSG00000032120
BP	GO:0006820	anion transport	52|1102	435|14957	0.000359193	0.00672826	ENSMUSG00000019935/ENSMUSG00000055254/ENSMUSG00000074345/ENSMUSG00000017754/ENSMUSG00000079263/ENSMUSG00000023073/ENSMUSG00000020826/ENSMUSG00000021948/ENSMUSG00000032080/ENSMUSG00000032193/ENSMUSG00000032883/ENSMUSG00000024851/ENSMUSG00000032083/ENSMUSG00000023088/ENSMUSG00000020873/ENSMUSG00000030774/ENSMUSG00000021135/ENSMUSG00000031378/ENSMUSG00000030762/ENSMUSG00000018796/ENSMUSG00000015243/…	Slc17a8/Ntrk2/Tnfaip8l3/Pltp/Gm6614/Slc10a2/Nos2/Prkcd/Apoa4/Ldlr/Acsl3/Pitpnm1/Apoa1/Abcc1/Slc35b1/Pak1/Slc10a1/Abcd1/Aqp8/Acsl1/Abca1/Scp2/Slc25a1/Rbp4/Slco3a1/Clic1/Lrrc8b/Slc37a4/Atp9a/Slc2a1/Adora1/Ank/Eprs/Slc22a7/Racgap1/Slc22a30/Slco2a1/Slc19a1/Slc2a2/Dpysl2/Mttp/Abcc3/Slc13a3/Hk1/Adora2a/Apoa5/Slc1a5/Il1rn/Slc27a2/Clic6/Slco1b2/Slc16a3	52	28	ENSMUSG00000074345/ENSMUSG00000023073/ENSMUSG00000020826/ENSMUSG00000021948/ENSMUSG00000032193/ENSMUSG00000032883/ENSMUSG00000024851/ENSMUSG00000023088/ENSMUSG00000030774/ENSMUSG00000031378/ENSMUSG00000030762/ENSMUSG00000003528/ENSMUSG00000025790/ENSMUSG00000007041/ENSMUSG00000070639/ENSMUSG00000028645/ENSMUSG00000042429/ENSMUSG00000023015/ENSMUSG00000032548/ENSMUSG00000022048/ENSMUSG00000020865/…	24	ENSMUSG00000019935/ENSMUSG00000055254/ENSMUSG00000017754/ENSMUSG00000079263/ENSMUSG00000032080/ENSMUSG00000032083/ENSMUSG00000020873/ENSMUSG00000021135/ENSMUSG00000018796/ENSMUSG00000015243/ENSMUSG00000028603/ENSMUSG00000024990/ENSMUSG00000032114/ENSMUSG00000027546/ENSMUSG00000022265/ENSMUSG00000026615/ENSMUSG00000067144/ENSMUSG00000052562/ENSMUSG00000001436/ENSMUSG00000027690/ENSMUSG00000028158/…
BP	GO:0046006	regulation of activated T cell proliferation	9|1102	32|14957	0.000368362	0.00684966	ENSMUSG00000031628/ENSMUSG00000039217/ENSMUSG00000004043/ENSMUSG00000039323/ENSMUSG00000016496/ENSMUSG00000031805/ENSMUSG00000020053/ENSMUSG00000000732/ENSMUSG00000030793	Casp3/Il18/Stat5a/Igfbp2/Cd274/Jak3/Igf1/Icosl/Pycard	9	7	ENSMUSG00000031628/ENSMUSG00000039217/ENSMUSG00000004043/ENSMUSG00000016496/ENSMUSG00000031805/ENSMUSG00000000732/ENSMUSG00000030793	2	ENSMUSG00000039323/ENSMUSG00000020053
BP	GO:2000406	positive regulation of T cell migration	9|1102	32|14957	0.000368362	0.00684966	ENSMUSG00000042333/ENSMUSG00000049103/ENSMUSG00000027009/ENSMUSG00000051457/ENSMUSG00000034855/ENSMUSG00000024397/ENSMUSG00000035042/ENSMUSG00000030793/ENSMUSG00000001123	Tnfrsf14/Ccr2/Itga4/Spn/Cxcl10/Aif1/Ccl5/Pycard/Lgals9	9	9	ENSMUSG00000042333/ENSMUSG00000049103/ENSMUSG00000027009/ENSMUSG00000051457/ENSMUSG00000034855/ENSMUSG00000024397/ENSMUSG00000035042/ENSMUSG00000030793/ENSMUSG00000001123	0
BP	GO:0031331	positive regulation of cellular catabolic process	43|1102	341|14957	0.000371395	0.00688094	ENSMUSG00000069874/ENSMUSG00000055782/ENSMUSG00000030827/ENSMUSG00000030560/ENSMUSG00000002227/ENSMUSG00000021948/ENSMUSG00000032350/ENSMUSG00000032080/ENSMUSG00000032193/ENSMUSG00000044254/ENSMUSG00000090877/ENSMUSG00000046879/ENSMUSG00000038375/ENSMUSG00000000628/ENSMUSG00000027995/ENSMUSG00000031207/ENSMUSG00000031378/ENSMUSG00000091971/ENSMUSG00000028793/ENSMUSG00000032540/ENSMUSG00000003435/…	Irgm2/Abcd2/Fgf21/Ctsc/Mov10/Prkcd/Gclc/Apoa4/Ldlr/Pcsk9/Hspa1b/Irgm1/Trp53inp2/Hk2/Tlr2/Msn/Abcd1/Hspa1a/Rnf19b/Abhd5/Supt5/Zc3h12d/Zc3hav1/Igf1/Ticam1/Gpd1/Gpld1/Bag2/Tpcn1/Plin5/Nod2/Rack1/Hsp90aa1/Pabpc1/Apoa5/Ecscr/Rnf19a/Tbk1/Tob1/Igfbp3/Tnfaip3/Atpif1/Gck	43	26	ENSMUSG00000069874/ENSMUSG00000055782/ENSMUSG00000030560/ENSMUSG00000002227/ENSMUSG00000021948/ENSMUSG00000032350/ENSMUSG00000032193/ENSMUSG00000044254/ENSMUSG00000090877/ENSMUSG00000046879/ENSMUSG00000000628/ENSMUSG00000027995/ENSMUSG00000031207/ENSMUSG00000031378/ENSMUSG00000091971/ENSMUSG00000028793/ENSMUSG00000039981/ENSMUSG00000029826/ENSMUSG00000042215/ENSMUSG00000055994/ENSMUSG00000021270/…	17	ENSMUSG00000030827/ENSMUSG00000032080/ENSMUSG00000038375/ENSMUSG00000032540/ENSMUSG00000003435/ENSMUSG00000020053/ENSMUSG00000047123/ENSMUSG00000023019/ENSMUSG00000021340/ENSMUSG00000032741/ENSMUSG00000011305/ENSMUSG00000020372/ENSMUSG00000022283/ENSMUSG00000032079/ENSMUSG00000022280/ENSMUSG00000020427/ENSMUSG00000041798
BP	GO:1901293	nucleoside phosphate biosynthetic process	35|1102	260|14957	0.000380173	0.00699422	ENSMUSG00000013629/ENSMUSG00000017390/ENSMUSG00000020826/ENSMUSG00000020638/ENSMUSG00000023982/ENSMUSG00000020917/ENSMUSG00000052776/ENSMUSG00000037847/ENSMUSG00000032478/ENSMUSG00000029561/ENSMUSG00000028671/ENSMUSG00000036813/ENSMUSG00000115338/ENSMUSG00000000628/ENSMUSG00000042010/ENSMUSG00000032047/ENSMUSG00000018796/ENSMUSG00000036067/ENSMUSG00000064354/ENSMUSG00000032294/ENSMUSG00000035232/…	Cad/Aldoc/Nos2/Cmpk2/Guca1a/Acly/Oas1a/Nmrk1/Nme6/Oasl2/Gale/Entpd8/Pnp/Hk2/Acacb/Acat1/Acsl1/Slc2a6/mt-Co2/Pkm/Pdk3/Igf1/Hk3/Gpd1/Pklr/Acss2/Ak7/Adpgk/Stat3/Pank4/Hk1/Kars/Pfkp/Ctps2/Gck	35	23	ENSMUSG00000017390/ENSMUSG00000020826/ENSMUSG00000020638/ENSMUSG00000023982/ENSMUSG00000020917/ENSMUSG00000052776/ENSMUSG00000029561/ENSMUSG00000028671/ENSMUSG00000115338/ENSMUSG00000000628/ENSMUSG00000042010/ENSMUSG00000036067/ENSMUSG00000064354/ENSMUSG00000032294/ENSMUSG00000035232/ENSMUSG00000025877/ENSMUSG00000027605/ENSMUSG00000041323/ENSMUSG00000004040/ENSMUSG00000037012/ENSMUSG00000031948/…	12	ENSMUSG00000013629/ENSMUSG00000037847/ENSMUSG00000032478/ENSMUSG00000036813/ENSMUSG00000032047/ENSMUSG00000018796/ENSMUSG00000020053/ENSMUSG00000023019/ENSMUSG00000041237/ENSMUSG00000025236/ENSMUSG00000029056/ENSMUSG00000041798
BP	GO:0034377	plasma lipoprotein particle assembly	7|1102	20|14957	0.000381628	0.00699422	ENSMUSG00000032080/ENSMUSG00000032883/ENSMUSG00000057074/ENSMUSG00000032083/ENSMUSG00000015243/ENSMUSG00000028158/ENSMUSG00000032079	Apoa4/Acsl3/Ces1g/Apoa1/Abca1/Mttp/Apoa5	7	2	ENSMUSG00000032883/ENSMUSG00000057074	5	ENSMUSG00000032080/ENSMUSG00000032083/ENSMUSG00000015243/ENSMUSG00000028158/ENSMUSG00000032079
BP	GO:0045063	T-helper 1 cell differentiation	7|1102	20|14957	0.000381628	0.00699422	ENSMUSG00000049103/ENSMUSG00000028064/ENSMUSG00000002983/ENSMUSG00000018899/ENSMUSG00000051457/ENSMUSG00000031805/ENSMUSG00000044701	Ccr2/Sema4a/Relb/Irf1/Spn/Jak3/Il27	7	7	ENSMUSG00000049103/ENSMUSG00000028064/ENSMUSG00000002983/ENSMUSG00000018899/ENSMUSG00000051457/ENSMUSG00000031805/ENSMUSG00000044701	0
BP	GO:0002819	regulation of adaptive immune response	26|1102	173|14957	0.000388367	0.00709221	ENSMUSG00000025498/ENSMUSG00000030895/ENSMUSG00000067235/ENSMUSG00000026072/ENSMUSG00000042333/ENSMUSG00000049103/ENSMUSG00000039217/ENSMUSG00000023249/ENSMUSG00000039384/ENSMUSG00000015947/ENSMUSG00000018899/ENSMUSG00000051457/ENSMUSG00000041471/ENSMUSG00000115338/ENSMUSG00000016496/ENSMUSG00000028076/ENSMUSG00000031805/ENSMUSG00000031101/ENSMUSG00000031497/ENSMUSG00000058715/ENSMUSG00000055994/…	Irf7/Hpx/H2-Q10/Il1r1/Tnfrsf14/Ccr2/Il18/Parp3/Dusp10/Fcgr1/Irf1/Spn/Shld2/Pnp/Cd274/Cd1d1/Jak3/Sash3/Tnfsf13b/Fcer1g/Nod2/Il27/Pycard/Tnfaip3/H2-DMa/Malt1	26	24	ENSMUSG00000025498/ENSMUSG00000030895/ENSMUSG00000067235/ENSMUSG00000042333/ENSMUSG00000049103/ENSMUSG00000039217/ENSMUSG00000023249/ENSMUSG00000039384/ENSMUSG00000015947/ENSMUSG00000018899/ENSMUSG00000051457/ENSMUSG00000115338/ENSMUSG00000016496/ENSMUSG00000028076/ENSMUSG00000031805/ENSMUSG00000031101/ENSMUSG00000031497/ENSMUSG00000058715/ENSMUSG00000055994/ENSMUSG00000044701/ENSMUSG00000030793/…	2	ENSMUSG00000026072/ENSMUSG00000041471
BP	GO:0033700	phospholipid efflux	5|1102	10|14957	0.000396233	0.00721003	ENSMUSG00000032080/ENSMUSG00000032083/ENSMUSG00000023088/ENSMUSG00000015243/ENSMUSG00000032079	Apoa4/Apoa1/Abcc1/Abca1/Apoa5	5	1	ENSMUSG00000023088	4	ENSMUSG00000032080/ENSMUSG00000032083/ENSMUSG00000015243/ENSMUSG00000032079
BP	GO:0043032	positive regulation of macrophage activation	8|1102	26|14957	0.000398464	0.00722481	ENSMUSG00000030560/ENSMUSG00000016024/ENSMUSG00000015599/ENSMUSG00000028076/ENSMUSG00000001123/ENSMUSG00000031948/ENSMUSG00000079685/ENSMUSG00000029254	Ctsc/Lbp/Ttbk1/Cd1d1/Lgals9/Kars/Ulbp1/Stap1	8	6	ENSMUSG00000030560/ENSMUSG00000016024/ENSMUSG00000028076/ENSMUSG00000001123/ENSMUSG00000031948/ENSMUSG00000079685	2	ENSMUSG00000015599/ENSMUSG00000029254
BP	GO:0015850	organic hydroxy compound transport	27|1102	183|14957	0.000408951	0.00738867	ENSMUSG00000027577/ENSMUSG00000017754/ENSMUSG00000079263/ENSMUSG00000023073/ENSMUSG00000025044/ENSMUSG00000032080/ENSMUSG00000032193/ENSMUSG00000044254/ENSMUSG00000032231/ENSMUSG00000032083/ENSMUSG00000023022/ENSMUSG00000021135/ENSMUSG00000030762/ENSMUSG00000015243/ENSMUSG00000028603/ENSMUSG00000024990/ENSMUSG00000050335/ENSMUSG00000063704/ENSMUSG00000058715/ENSMUSG00000020865/ENSMUSG00000020178/…	Chrna4/Pltp/Gm6614/Slc10a2/Msr1/Apoa4/Ldlr/Pcsk9/Anxa2/Apoa1/Lima1/Slc10a1/Aqp8/Abca1/Scp2/Rbp4/Lgals3/Mapk15/Fcer1g/Abcc3/Adora2a/Apoa5/Igfbp3/Slco1b2/Gck/Slc16a3/Acat2	27	15	ENSMUSG00000027577/ENSMUSG00000023073/ENSMUSG00000025044/ENSMUSG00000032193/ENSMUSG00000044254/ENSMUSG00000032231/ENSMUSG00000023022/ENSMUSG00000030762/ENSMUSG00000050335/ENSMUSG00000063704/ENSMUSG00000058715/ENSMUSG00000020865/ENSMUSG00000020178/ENSMUSG00000025161/ENSMUSG00000023832	12	ENSMUSG00000017754/ENSMUSG00000079263/ENSMUSG00000032080/ENSMUSG00000032083/ENSMUSG00000021135/ENSMUSG00000015243/ENSMUSG00000028603/ENSMUSG00000024990/ENSMUSG00000032079/ENSMUSG00000020427/ENSMUSG00000030236/ENSMUSG00000041798
BP	GO:0001676	long-chain fatty acid metabolic process	16|1102	85|14957	0.00042065	0.00755894	ENSMUSG00000003053/ENSMUSG00000042248/ENSMUSG00000060613/ENSMUSG00000062624/ENSMUSG00000003123/ENSMUSG00000060407/ENSMUSG00000054827/ENSMUSG00000031378/ENSMUSG00000018796/ENSMUSG00000072949/ENSMUSG00000025002/ENSMUSG00000030483/ENSMUSG00000074882/ENSMUSG00000052914/ENSMUSG00000027359/ENSMUSG00000021620	Cyp2c29/Cyp2c37/Cyp2c70/Cyp2c67/Lipe/Cyp2a12/Cyp2c50/Abcd1/Acsl1/Acot1/Cyp2c55/Cyp2b10/Cyp2c68/Cyp2j6/Slc27a2/Acot12	16	7	ENSMUSG00000003053/ENSMUSG00000042248/ENSMUSG00000003123/ENSMUSG00000054827/ENSMUSG00000031378/ENSMUSG00000025002/ENSMUSG00000030483	9	ENSMUSG00000060613/ENSMUSG00000062624/ENSMUSG00000060407/ENSMUSG00000018796/ENSMUSG00000072949/ENSMUSG00000074882/ENSMUSG00000052914/ENSMUSG00000027359/ENSMUSG00000021620
BP	GO:0002831	regulation of response to biotic stimulus	22|1102	137|14957	0.000421342	0.00755894	ENSMUSG00000022126/ENSMUSG00000036986/ENSMUSG00000021624/ENSMUSG00000009585/ENSMUSG00000026104/ENSMUSG00000079363/ENSMUSG00000051457/ENSMUSG00000027995/ENSMUSG00000016496/ENSMUSG00000017830/ENSMUSG00000040296/ENSMUSG00000029826/ENSMUSG00000037921/ENSMUSG00000055994/ENSMUSG00000035042/ENSMUSG00000044701/ENSMUSG00000034292/ENSMUSG00000030793/ENSMUSG00000001123/ENSMUSG00000079685/ENSMUSG00000020115/…	Acod1/Pml/Cd180/Apobec3/Stat1/Gbp4/Spn/Tlr2/Cd274/Dhx58/Ddx58/Zc3hav1/Ddx60/Nod2/Ccl5/Il27/Traf3ip1/Pycard/Lgals9/Ulbp1/Tbk1/Tnfaip3	22	21	ENSMUSG00000022126/ENSMUSG00000036986/ENSMUSG00000021624/ENSMUSG00000009585/ENSMUSG00000026104/ENSMUSG00000079363/ENSMUSG00000051457/ENSMUSG00000027995/ENSMUSG00000016496/ENSMUSG00000017830/ENSMUSG00000040296/ENSMUSG00000029826/ENSMUSG00000037921/ENSMUSG00000055994/ENSMUSG00000035042/ENSMUSG00000044701/ENSMUSG00000030793/ENSMUSG00000001123/ENSMUSG00000079685/ENSMUSG00000020115/ENSMUSG00000019850	1	ENSMUSG00000034292
BP	GO:0046486	glycerolipid metabolic process	39|1102	302|14957	0.000425626	0.007609	ENSMUSG00000027533/ENSMUSG00000026385/ENSMUSG00000022425/ENSMUSG00000045294/ENSMUSG00000030827/ENSMUSG00000032080/ENSMUSG00000032193/ENSMUSG00000003123/ENSMUSG00000038037/ENSMUSG00000041567/ENSMUSG00000023232/ENSMUSG00000044254/ENSMUSG00000032883/ENSMUSG00000057074/ENSMUSG00000032083/ENSMUSG00000052270/ENSMUSG00000037071/ENSMUSG00000018796/ENSMUSG00000038174/ENSMUSG00000024525/ENSMUSG00000032540/…	Fabp5/Dbi/Enpp2/Insig1/Fgf21/Apoa4/Ldlr/Lipe/Socs1/Serpina12/Serinc2/Pcsk9/Acsl3/Ces1g/Apoa1/Fpr2/Scd1/Acsl1/Fam126b/Impa2/Abhd5/Abhd16a/Slc37a4/Pla2g7/Far1/Gpd1/Plek/Gpld1/Fitm2/Angptl3/Plcg2/Plin5/Plscr1/Gpat3/Mttp/Pla2g16/Sh3yl1/Apoa5/Inpp5f	39	20	ENSMUSG00000026385/ENSMUSG00000045294/ENSMUSG00000032193/ENSMUSG00000003123/ENSMUSG00000038037/ENSMUSG00000023232/ENSMUSG00000044254/ENSMUSG00000032883/ENSMUSG00000057074/ENSMUSG00000052270/ENSMUSG00000037071/ENSMUSG00000024525/ENSMUSG00000007036/ENSMUSG00000030759/ENSMUSG00000020120/ENSMUSG00000034330/ENSMUSG00000032369/ENSMUSG00000029314/ENSMUSG00000060675/ENSMUSG00000020669	19	ENSMUSG00000027533/ENSMUSG00000022425/ENSMUSG00000030827/ENSMUSG00000032080/ENSMUSG00000041567/ENSMUSG00000032083/ENSMUSG00000018796/ENSMUSG00000038174/ENSMUSG00000032540/ENSMUSG00000032114/ENSMUSG00000023913/ENSMUSG00000023019/ENSMUSG00000021340/ENSMUSG00000048486/ENSMUSG00000028553/ENSMUSG00000011305/ENSMUSG00000028158/ENSMUSG00000032079/ENSMUSG00000042105
BP	GO:0046632	alpha-beta T cell differentiation	18|1102	102|14957	0.000431601	0.00768884	ENSMUSG00000049103/ENSMUSG00000039217/ENSMUSG00000038037/ENSMUSG00000028064/ENSMUSG00000002983/ENSMUSG00000018899/ENSMUSG00000051457/ENSMUSG00000053175/ENSMUSG00000115338/ENSMUSG00000028076/ENSMUSG00000031805/ENSMUSG00000050350/ENSMUSG00000031101/ENSMUSG00000002413/ENSMUSG00000004040/ENSMUSG00000044701/ENSMUSG00000028362/ENSMUSG00000032688	Ccr2/Il18/Socs1/Sema4a/Relb/Irf1/Spn/Bcl3/Pnp/Cd1d1/Jak3/Gpr18/Sash3/Braf/Stat3/Il27/Tnfsf8/Malt1	18	17	ENSMUSG00000049103/ENSMUSG00000039217/ENSMUSG00000038037/ENSMUSG00000028064/ENSMUSG00000002983/ENSMUSG00000018899/ENSMUSG00000051457/ENSMUSG00000053175/ENSMUSG00000115338/ENSMUSG00000028076/ENSMUSG00000031805/ENSMUSG00000050350/ENSMUSG00000031101/ENSMUSG00000004040/ENSMUSG00000044701/ENSMUSG00000028362/ENSMUSG00000032688	1	ENSMUSG00000002413
BP	GO:0019058	viral life cycle	27|1102	184|14957	0.000446458	0.00791897	ENSMUSG00000020914/ENSMUSG00000046718/ENSMUSG00000068220/ENSMUSG00000025492/ENSMUSG00000036986/ENSMUSG00000037405/ENSMUSG00000052776/ENSMUSG00000026542/ENSMUSG00000032231/ENSMUSG00000025130/ENSMUSG00000009585/ENSMUSG00000029561/ENSMUSG00000010175/ENSMUSG00000031451/ENSMUSG00000035692/ENSMUSG00000060591/ENSMUSG00000029826/ENSMUSG00000023944/ENSMUSG00000032383/ENSMUSG00000063268/ENSMUSG00000032369/…	Top2a/Bst2/Lgals1/Ifitm3/Pml/Icam1/Oas1a/Apcs/Anxa2/P4hb/Apobec3/Oasl2/Prox1/Gas6/Isg15/Ifitm2/Zc3hav1/Hsp90ab1/Ppib/Parp10/Plscr1/Ccl5/Oas3/Atg16l2/Pabpc1/Ddb1/Chmp4b	27	22	ENSMUSG00000020914/ENSMUSG00000046718/ENSMUSG00000068220/ENSMUSG00000025492/ENSMUSG00000036986/ENSMUSG00000037405/ENSMUSG00000052776/ENSMUSG00000026542/ENSMUSG00000032231/ENSMUSG00000009585/ENSMUSG00000029561/ENSMUSG00000031451/ENSMUSG00000035692/ENSMUSG00000060591/ENSMUSG00000029826/ENSMUSG00000023944/ENSMUSG00000063268/ENSMUSG00000032369/ENSMUSG00000035042/ENSMUSG00000032661/ENSMUSG00000047767/…	5	ENSMUSG00000025130/ENSMUSG00000010175/ENSMUSG00000032383/ENSMUSG00000022283/ENSMUSG00000024740
BP	GO:1901652	response to peptide	43|1102	344|14957	0.000447628	0.00791897	ENSMUSG00000058207/ENSMUSG00000026728/ENSMUSG00000013629/ENSMUSG00000021948/ENSMUSG00000037405/ENSMUSG00000039217/ENSMUSG00000027009/ENSMUSG00000038037/ENSMUSG00000041567/ENSMUSG00000044254/ENSMUSG00000026641/ENSMUSG00000026104/ENSMUSG00000040033/ENSMUSG00000041481/ENSMUSG00000004043/ENSMUSG00000066363/ENSMUSG00000030774/ENSMUSG00000027199/ENSMUSG00000018899/ENSMUSG00000052270/ENSMUSG00000024789/…	Serpina3k/Vim/Cad/Prkcd/Icam1/Il18/Itga4/Socs1/Serpina12/Pcsk9/Usf1/Stat1/Stat2/Serpina3g/Stat5a/Serpina3f/Pak1/Gatm/Irf1/Fpr2/Jak2/Capn1/Serpina3c/Rbp4/Pkm/Serpina3i/Zfp106/Atp1a3/Igf1/Eprs/Gpld1/Braf/Gnai2/Pklr/Cacybp/Nfkb1/Nod2/Rangap1/Stat3/Tnfaip3/Bglap3/Gck/Ahsg	43	28	ENSMUSG00000026728/ENSMUSG00000021948/ENSMUSG00000037405/ENSMUSG00000039217/ENSMUSG00000027009/ENSMUSG00000038037/ENSMUSG00000044254/ENSMUSG00000026641/ENSMUSG00000026104/ENSMUSG00000040033/ENSMUSG00000041481/ENSMUSG00000004043/ENSMUSG00000066363/ENSMUSG00000030774/ENSMUSG00000027199/ENSMUSG00000018899/ENSMUSG00000052270/ENSMUSG00000024789/ENSMUSG00000024942/ENSMUSG00000032294/ENSMUSG00000079014/…	15	ENSMUSG00000058207/ENSMUSG00000013629/ENSMUSG00000041567/ENSMUSG00000066361/ENSMUSG00000024990/ENSMUSG00000027288/ENSMUSG00000020053/ENSMUSG00000026615/ENSMUSG00000021340/ENSMUSG00000002413/ENSMUSG00000041237/ENSMUSG00000022391/ENSMUSG00000074489/ENSMUSG00000041798/ENSMUSG00000022868
BP	GO:0002285	lymphocyte activation involved in immune response	24|1102	156|14957	0.000452382	0.00797539	ENSMUSG00000068220/ENSMUSG00000049103/ENSMUSG00000037405/ENSMUSG00000021624/ENSMUSG00000039217/ENSMUSG00000023249/ENSMUSG00000028064/ENSMUSG00000002983/ENSMUSG00000018899/ENSMUSG00000051457/ENSMUSG00000053175/ENSMUSG00000041471/ENSMUSG00000031805/ENSMUSG00000000732/ENSMUSG00000030707/ENSMUSG00000050335/ENSMUSG00000034330/ENSMUSG00000058715/ENSMUSG00000004040/ENSMUSG00000021998/ENSMUSG00000044701/…	Lgals1/Ccr2/Icam1/Cd180/Il18/Parp3/Sema4a/Relb/Irf1/Spn/Bcl3/Shld2/Jak3/Icosl/Coro1a/Lgals3/Plcg2/Fcer1g/Stat3/Lcp1/Il27/Lgals9/Tnfaip3/Malt1	24	23	ENSMUSG00000068220/ENSMUSG00000049103/ENSMUSG00000037405/ENSMUSG00000021624/ENSMUSG00000039217/ENSMUSG00000023249/ENSMUSG00000028064/ENSMUSG00000002983/ENSMUSG00000018899/ENSMUSG00000051457/ENSMUSG00000053175/ENSMUSG00000031805/ENSMUSG00000000732/ENSMUSG00000030707/ENSMUSG00000050335/ENSMUSG00000034330/ENSMUSG00000058715/ENSMUSG00000004040/ENSMUSG00000021998/ENSMUSG00000044701/ENSMUSG00000001123/…	1	ENSMUSG00000041471
BP	GO:0032613	interleukin-10 production	12|1102	54|14957	0.000456417	0.00798783	ENSMUSG00000021948/ENSMUSG00000053175/ENSMUSG00000027995/ENSMUSG00000016496/ENSMUSG00000035692/ENSMUSG00000031805/ENSMUSG00000031101/ENSMUSG00000055447/ENSMUSG00000058715/ENSMUSG00000055994/ENSMUSG00000030793/ENSMUSG00000001123	Prkcd/Bcl3/Tlr2/Cd274/Isg15/Jak3/Sash3/Cd47/Fcer1g/Nod2/Pycard/Lgals9	12	12	ENSMUSG00000021948/ENSMUSG00000053175/ENSMUSG00000027995/ENSMUSG00000016496/ENSMUSG00000035692/ENSMUSG00000031805/ENSMUSG00000031101/ENSMUSG00000055447/ENSMUSG00000058715/ENSMUSG00000055994/ENSMUSG00000030793/ENSMUSG00000001123	0
BP	GO:0033865	nucleoside bisphosphate metabolic process	17|1102	94|14957	0.000459359	0.00798783	ENSMUSG00000020917/ENSMUSG00000042010/ENSMUSG00000032047/ENSMUSG00000031378/ENSMUSG00000018796/ENSMUSG00000028603/ENSMUSG00000027952/ENSMUSG00000072949/ENSMUSG00000041939/ENSMUSG00000035232/ENSMUSG00000030759/ENSMUSG00000027875/ENSMUSG00000027605/ENSMUSG00000093930/ENSMUSG00000029056/ENSMUSG00000030935/ENSMUSG00000021620	Acly/Acacb/Acat1/Abcd1/Acsl1/Scp2/Pmvk/Acot1/Mvk/Pdk3/Far1/Hmgcs2/Acss2/Hmgcs1/Pank4/Acsm3/Acot12	17	9	ENSMUSG00000020917/ENSMUSG00000042010/ENSMUSG00000031378/ENSMUSG00000027952/ENSMUSG00000041939/ENSMUSG00000035232/ENSMUSG00000030759/ENSMUSG00000027605/ENSMUSG00000093930	8	ENSMUSG00000032047/ENSMUSG00000018796/ENSMUSG00000028603/ENSMUSG00000072949/ENSMUSG00000027875/ENSMUSG00000029056/ENSMUSG00000030935/ENSMUSG00000021620
BP	GO:0033875	ribonucleoside bisphosphate metabolic process	17|1102	94|14957	0.000459359	0.00798783	ENSMUSG00000020917/ENSMUSG00000042010/ENSMUSG00000032047/ENSMUSG00000031378/ENSMUSG00000018796/ENSMUSG00000028603/ENSMUSG00000027952/ENSMUSG00000072949/ENSMUSG00000041939/ENSMUSG00000035232/ENSMUSG00000030759/ENSMUSG00000027875/ENSMUSG00000027605/ENSMUSG00000093930/ENSMUSG00000029056/ENSMUSG00000030935/ENSMUSG00000021620	Acly/Acacb/Acat1/Abcd1/Acsl1/Scp2/Pmvk/Acot1/Mvk/Pdk3/Far1/Hmgcs2/Acss2/Hmgcs1/Pank4/Acsm3/Acot12	17	9	ENSMUSG00000020917/ENSMUSG00000042010/ENSMUSG00000031378/ENSMUSG00000027952/ENSMUSG00000041939/ENSMUSG00000035232/ENSMUSG00000030759/ENSMUSG00000027605/ENSMUSG00000093930	8	ENSMUSG00000032047/ENSMUSG00000018796/ENSMUSG00000028603/ENSMUSG00000072949/ENSMUSG00000027875/ENSMUSG00000029056/ENSMUSG00000030935/ENSMUSG00000021620
BP	GO:0034032	purine nucleoside bisphosphate metabolic process	17|1102	94|14957	0.000459359	0.00798783	ENSMUSG00000020917/ENSMUSG00000042010/ENSMUSG00000032047/ENSMUSG00000031378/ENSMUSG00000018796/ENSMUSG00000028603/ENSMUSG00000027952/ENSMUSG00000072949/ENSMUSG00000041939/ENSMUSG00000035232/ENSMUSG00000030759/ENSMUSG00000027875/ENSMUSG00000027605/ENSMUSG00000093930/ENSMUSG00000029056/ENSMUSG00000030935/ENSMUSG00000021620	Acly/Acacb/Acat1/Abcd1/Acsl1/Scp2/Pmvk/Acot1/Mvk/Pdk3/Far1/Hmgcs2/Acss2/Hmgcs1/Pank4/Acsm3/Acot12	17	9	ENSMUSG00000020917/ENSMUSG00000042010/ENSMUSG00000031378/ENSMUSG00000027952/ENSMUSG00000041939/ENSMUSG00000035232/ENSMUSG00000030759/ENSMUSG00000027605/ENSMUSG00000093930	8	ENSMUSG00000032047/ENSMUSG00000018796/ENSMUSG00000028603/ENSMUSG00000072949/ENSMUSG00000027875/ENSMUSG00000029056/ENSMUSG00000030935/ENSMUSG00000021620
BP	GO:0032602	chemokine production	16|1102	86|14957	0.000482115	0.00835501	ENSMUSG00000039217/ENSMUSG00000016024/ENSMUSG00000025494/ENSMUSG00000027995/ENSMUSG00000040329/ENSMUSG00000032114/ENSMUSG00000047123/ENSMUSG00000037902/ENSMUSG00000032508/ENSMUSG00000024397/ENSMUSG00000031639/ENSMUSG00000055994/ENSMUSG00000035042/ENSMUSG00000030793/ENSMUSG00000001123/ENSMUSG00000044583	Il18/Lbp/Sigirr/Tlr2/Il7/Slc37a4/Ticam1/Sirpa/Myd88/Aif1/Tlr3/Nod2/Ccl5/Pycard/Lgals9/Tlr7	16	13	ENSMUSG00000039217/ENSMUSG00000016024/ENSMUSG00000025494/ENSMUSG00000027995/ENSMUSG00000040329/ENSMUSG00000037902/ENSMUSG00000032508/ENSMUSG00000024397/ENSMUSG00000031639/ENSMUSG00000055994/ENSMUSG00000035042/ENSMUSG00000030793/ENSMUSG00000001123	3	ENSMUSG00000032114/ENSMUSG00000047123/ENSMUSG00000044583
BP	GO:0009410	response to xenobiotic stimulus	27|1102	185|14957	0.000486959	0.00838195	ENSMUSG00000003053/ENSMUSG00000042248/ENSMUSG00000060613/ENSMUSG00000032350/ENSMUSG00000035836/ENSMUSG00000058135/ENSMUSG00000062624/ENSMUSG00000058216/ENSMUSG00000068762/ENSMUSG00000025934/ENSMUSG00000027490/ENSMUSG00000004043/ENSMUSG00000060407/ENSMUSG00000024789/ENSMUSG00000054827/ENSMUSG00000018796/ENSMUSG00000057933/ENSMUSG00000025002/ENSMUSG00000025813/ENSMUSG00000030483/ENSMUSG00000074882/…	Cyp2c29/Cyp2c37/Cyp2c70/Gclc/Ugt2b1/Gstm1/Cyp2c67/Gstp3/Gstm6/Gsta3/E2f1/Stat5a/Cyp2a12/Jak2/Cyp2c50/Acsl1/Gsta2/Cyp2c55/Homer2/Cyp2b10/Cyp2c68/Cyp2r1/Gstp2/Adora2a/Gstm4/Slc8a1/Cyp2j6	27	18	ENSMUSG00000003053/ENSMUSG00000042248/ENSMUSG00000032350/ENSMUSG00000058135/ENSMUSG00000068762/ENSMUSG00000025934/ENSMUSG00000027490/ENSMUSG00000004043/ENSMUSG00000024789/ENSMUSG00000054827/ENSMUSG00000057933/ENSMUSG00000025002/ENSMUSG00000030483/ENSMUSG00000030670/ENSMUSG00000038155/ENSMUSG00000020178/ENSMUSG00000027890/ENSMUSG00000054640	9	ENSMUSG00000060613/ENSMUSG00000035836/ENSMUSG00000062624/ENSMUSG00000058216/ENSMUSG00000060407/ENSMUSG00000018796/ENSMUSG00000025813/ENSMUSG00000074882/ENSMUSG00000052914
BP	GO:0046434	organophosphate catabolic process	27|1102	185|14957	0.000486959	0.00838195	ENSMUSG00000022425/ENSMUSG00000017390/ENSMUSG00000021948/ENSMUSG00000032193/ENSMUSG00000028671/ENSMUSG00000020407/ENSMUSG00000000628/ENSMUSG00000032047/ENSMUSG00000031378/ENSMUSG00000036067/ENSMUSG00000032294/ENSMUSG00000024525/ENSMUSG00000007036/ENSMUSG00000023960/ENSMUSG00000020053/ENSMUSG00000025877/ENSMUSG00000023019/ENSMUSG00000041237/ENSMUSG00000028553/ENSMUSG00000034330/ENSMUSG00000025236/…	Enpp2/Aldoc/Prkcd/Ldlr/Gale/Upp1/Hk2/Acat1/Abcd1/Slc2a6/Pkm/Impa2/Abhd16a/Enpp5/Igf1/Hk3/Gpd1/Pklr/Angptl3/Plcg2/Adpgk/Stat3/Hk1/Pfkp/Inpp5f/Idh1/Gck	27	18	ENSMUSG00000017390/ENSMUSG00000021948/ENSMUSG00000032193/ENSMUSG00000028671/ENSMUSG00000020407/ENSMUSG00000000628/ENSMUSG00000031378/ENSMUSG00000036067/ENSMUSG00000032294/ENSMUSG00000024525/ENSMUSG00000007036/ENSMUSG00000023960/ENSMUSG00000025877/ENSMUSG00000034330/ENSMUSG00000004040/ENSMUSG00000037012/ENSMUSG00000021196/ENSMUSG00000025950	9	ENSMUSG00000022425/ENSMUSG00000032047/ENSMUSG00000020053/ENSMUSG00000023019/ENSMUSG00000041237/ENSMUSG00000028553/ENSMUSG00000025236/ENSMUSG00000042105/ENSMUSG00000041798
BP	GO:0034340	response to type I interferon	10|1102	40|14957	0.000498506	0.00852312	ENSMUSG00000025498/ENSMUSG00000074151/ENSMUSG00000025492/ENSMUSG00000027514/ENSMUSG00000026104/ENSMUSG00000040033/ENSMUSG00000035692/ENSMUSG00000060591/ENSMUSG00000032508/ENSMUSG00000020115	Irf7/Nlrc5/Ifitm3/Zbp1/Stat1/Stat2/Isg15/Ifitm2/Myd88/Tbk1	10	10	ENSMUSG00000025498/ENSMUSG00000074151/ENSMUSG00000025492/ENSMUSG00000027514/ENSMUSG00000026104/ENSMUSG00000040033/ENSMUSG00000035692/ENSMUSG00000060591/ENSMUSG00000032508/ENSMUSG00000020115	0
BP	GO:0050798	activated T cell proliferation	10|1102	40|14957	0.000498506	0.00852312	ENSMUSG00000031628/ENSMUSG00000039217/ENSMUSG00000004043/ENSMUSG00000039323/ENSMUSG00000016496/ENSMUSG00000031805/ENSMUSG00000000290/ENSMUSG00000020053/ENSMUSG00000000732/ENSMUSG00000030793	Casp3/Il18/Stat5a/Igfbp2/Cd274/Jak3/Itgb2/Igf1/Icosl/Pycard	10	8	ENSMUSG00000031628/ENSMUSG00000039217/ENSMUSG00000004043/ENSMUSG00000016496/ENSMUSG00000031805/ENSMUSG00000000290/ENSMUSG00000000732/ENSMUSG00000030793	2	ENSMUSG00000039323/ENSMUSG00000020053
BP	GO:0032647	regulation of interferon-alpha production	8|1102	27|14957	0.00053	0.00900116	ENSMUSG00000025498/ENSMUSG00000026104/ENSMUSG00000079363/ENSMUSG00000040296/ENSMUSG00000029826/ENSMUSG00000031639/ENSMUSG00000044583/ENSMUSG00000020115	Irf7/Stat1/Gbp4/Ddx58/Zc3hav1/Tlr3/Tlr7/Tbk1	8	7	ENSMUSG00000025498/ENSMUSG00000026104/ENSMUSG00000079363/ENSMUSG00000040296/ENSMUSG00000029826/ENSMUSG00000031639/ENSMUSG00000020115	1	ENSMUSG00000044583
BP	GO:0050718	positive regulation of interleukin-1 beta secretion	8|1102	27|14957	0.00053	0.00900116	ENSMUSG00000022575/ENSMUSG00000031934/ENSMUSG00000027995/ENSMUSG00000070390/ENSMUSG00000025888/ENSMUSG00000055994/ENSMUSG00000037012/ENSMUSG00000030793	Gsdmd/Panx1/Tlr2/Nlrp1b/Casp1/Nod2/Hk1/Pycard	8	8	ENSMUSG00000022575/ENSMUSG00000031934/ENSMUSG00000027995/ENSMUSG00000070390/ENSMUSG00000025888/ENSMUSG00000055994/ENSMUSG00000037012/ENSMUSG00000030793	0
BP	GO:0042535	positive regulation of tumor necrosis factor biosynthetic process	7|1102	21|14957	0.000536284	0.00907763	ENSMUSG00000049103/ENSMUSG00000016024/ENSMUSG00000051457/ENSMUSG00000024789/ENSMUSG00000027995/ENSMUSG00000004951/ENSMUSG00000044827	Ccr2/Lbp/Spn/Jak2/Tlr2/Hspb1/Tlr1	7	7	ENSMUSG00000049103/ENSMUSG00000016024/ENSMUSG00000051457/ENSMUSG00000024789/ENSMUSG00000027995/ENSMUSG00000004951/ENSMUSG00000044827	0
BP	GO:0042509	regulation of tyrosine phosphorylation of STAT protein	12|1102	55|14957	0.000545248	0.0091988	ENSMUSG00000030895/ENSMUSG00000034422/ENSMUSG00000039217/ENSMUSG00000038037/ENSMUSG00000022831/ENSMUSG00000018899/ENSMUSG00000024789/ENSMUSG00000030341/ENSMUSG00000020053/ENSMUSG00000035042/ENSMUSG00000034292/ENSMUSG00000042105	Hpx/Parp14/Il18/Socs1/Hcls1/Irf1/Jak2/Tnfrsf1a/Igf1/Ccl5/Traf3ip1/Inpp5f	12	9	ENSMUSG00000030895/ENSMUSG00000034422/ENSMUSG00000039217/ENSMUSG00000038037/ENSMUSG00000022831/ENSMUSG00000018899/ENSMUSG00000024789/ENSMUSG00000030341/ENSMUSG00000035042	3	ENSMUSG00000020053/ENSMUSG00000034292/ENSMUSG00000042105
BP	GO:2001056	positive regulation of cysteine-type endopeptidase activity	20|1102	122|14957	0.00057643	0.00969278	ENSMUSG00000002083/ENSMUSG00000036986/ENSMUSG00000057789/ENSMUSG00000026104/ENSMUSG00000024778/ENSMUSG00000024789/ENSMUSG00000025887/ENSMUSG00000015599/ENSMUSG00000056071/ENSMUSG00000071369/ENSMUSG00000020340/ENSMUSG00000028191/ENSMUSG00000003955/ENSMUSG00000070390/ENSMUSG00000025888/ENSMUSG00000039304/ENSMUSG00000020372/ENSMUSG00000030793/ENSMUSG00000039193/ENSMUSG00000032688	Bbc3/Pml/Bak1/Stat1/Fas/Jak2/Casp12/Ttbk1/S100a9/Map3k5/Cyfip2/Bcl10/Fam162a/Nlrp1b/Casp1/Tnfsf10/Rack1/Pycard/Nlrc4/Malt1	20	17	ENSMUSG00000002083/ENSMUSG00000036986/ENSMUSG00000057789/ENSMUSG00000026104/ENSMUSG00000024778/ENSMUSG00000024789/ENSMUSG00000025887/ENSMUSG00000056071/ENSMUSG00000020340/ENSMUSG00000028191/ENSMUSG00000003955/ENSMUSG00000070390/ENSMUSG00000025888/ENSMUSG00000039304/ENSMUSG00000030793/ENSMUSG00000039193/ENSMUSG00000032688	3	ENSMUSG00000015599/ENSMUSG00000071369/ENSMUSG00000020372
BP	GO:0006720	isoprenoid metabolic process	14|1102	71|14957	0.000581988	0.00975405	ENSMUSG00000066441/ENSMUSG00000056666/ENSMUSG00000028236/ENSMUSG00000027952/ENSMUSG00000024990/ENSMUSG00000041939/ENSMUSG00000025002/ENSMUSG00000027875/ENSMUSG00000008435/ENSMUSG00000058258/ENSMUSG00000026664/ENSMUSG00000093930/ENSMUSG00000052914/ENSMUSG00000012117	Rdh11/Retsat/Sdr16c5/Pmvk/Rbp4/Mvk/Cyp2c55/Hmgcs2/Rdh13/Idi1/Phyh/Hmgcs1/Cyp2j6/Dhdds	14	6	ENSMUSG00000066441/ENSMUSG00000027952/ENSMUSG00000041939/ENSMUSG00000025002/ENSMUSG00000058258/ENSMUSG00000093930	8	ENSMUSG00000056666/ENSMUSG00000028236/ENSMUSG00000024990/ENSMUSG00000027875/ENSMUSG00000008435/ENSMUSG00000026664/ENSMUSG00000052914/ENSMUSG00000012117
BP	GO:0002367	cytokine production involved in immune response	17|1102	96|14957	0.000591464	0.00988036	ENSMUSG00000026072/ENSMUSG00000042333/ENSMUSG00000049103/ENSMUSG00000039217/ENSMUSG00000032083/ENSMUSG00000027995/ENSMUSG00000031451/ENSMUSG00000040296/ENSMUSG00000031805/ENSMUSG00000031101/ENSMUSG00000047123/ENSMUSG00000031639/ENSMUSG00000058715/ENSMUSG00000055994/ENSMUSG00000037012/ENSMUSG00000031948/ENSMUSG00000032688	Il1r1/Tnfrsf14/Ccr2/Il18/Apoa1/Tlr2/Gas6/Ddx58/Jak3/Sash3/Ticam1/Tlr3/Fcer1g/Nod2/Hk1/Kars/Malt1	17	14	ENSMUSG00000042333/ENSMUSG00000049103/ENSMUSG00000039217/ENSMUSG00000027995/ENSMUSG00000031451/ENSMUSG00000040296/ENSMUSG00000031805/ENSMUSG00000031101/ENSMUSG00000031639/ENSMUSG00000058715/ENSMUSG00000055994/ENSMUSG00000037012/ENSMUSG00000031948/ENSMUSG00000032688	3	ENSMUSG00000026072/ENSMUSG00000032083/ENSMUSG00000047123
BP	GO:0036230	granulocyte activation	9|1102	34|14957	0.000602641	0.0100342	ENSMUSG00000021948/ENSMUSG00000049103/ENSMUSG00000039217/ENSMUSG00000024300/ENSMUSG00000000290/ENSMUSG00000058715/ENSMUSG00000035042/ENSMUSG00000031948/ENSMUSG00000059089	Prkcd/Ccr2/Il18/Myo1f/Itgb2/Fcer1g/Ccl5/Kars/Fcgr4	9	9	ENSMUSG00000021948/ENSMUSG00000049103/ENSMUSG00000039217/ENSMUSG00000024300/ENSMUSG00000000290/ENSMUSG00000058715/ENSMUSG00000035042/ENSMUSG00000031948/ENSMUSG00000059089	0
BP	GO:0019318	hexose metabolic process	29|1102	207|14957	0.0006095	0.0101153	ENSMUSG00000027533/ENSMUSG00000027808/ENSMUSG00000003226/ENSMUSG00000025271/ENSMUSG00000041567/ENSMUSG00000031594/ENSMUSG00000026641/ENSMUSG00000028671/ENSMUSG00000000628/ENSMUSG00000042010/ENSMUSG00000024990/ENSMUSG00000032294/ENSMUSG00000035232/ENSMUSG00000020053/ENSMUSG00000025466/ENSMUSG00000019810/ENSMUSG00000017493/ENSMUSG00000023019/ENSMUSG00000021340/ENSMUSG00000078683/ENSMUSG00000037306/…	Fabp5/Serp1/Ranbp2/Pfkfb1/Serpina12/Fgl1/Usf1/Gale/Hk2/Acacb/Rbp4/Pkm/Pdk3/Igf1/Fuom/Fuca2/Igfbp4/Gpd1/Gpld1/Mup1/Man1c1/Adpgk/Hk1/Ddb1/Pfkp/Atf3/Igfbp3/Gck/Phlda2	29	14	ENSMUSG00000031594/ENSMUSG00000026641/ENSMUSG00000028671/ENSMUSG00000000628/ENSMUSG00000042010/ENSMUSG00000032294/ENSMUSG00000035232/ENSMUSG00000025466/ENSMUSG00000019810/ENSMUSG00000037306/ENSMUSG00000037012/ENSMUSG00000021196/ENSMUSG00000026628/ENSMUSG00000010760	15	ENSMUSG00000027533/ENSMUSG00000027808/ENSMUSG00000003226/ENSMUSG00000025271/ENSMUSG00000041567/ENSMUSG00000024990/ENSMUSG00000020053/ENSMUSG00000017493/ENSMUSG00000023019/ENSMUSG00000021340/ENSMUSG00000078683/ENSMUSG00000025236/ENSMUSG00000024740/ENSMUSG00000020427/ENSMUSG00000041798
BP	GO:0001959	regulation of cytokine-mediated signaling pathway	18|1102	105|14957	0.000619035	0.0102402	ENSMUSG00000025498/ENSMUSG00000030895/ENSMUSG00000074151/ENSMUSG00000026072/ENSMUSG00000069874/ENSMUSG00000034422/ENSMUSG00000038037/ENSMUSG00000027514/ENSMUSG00000025494/ENSMUSG00000032083/ENSMUSG00000046879/ENSMUSG00000031451/ENSMUSG00000040329/ENSMUSG00000025888/ENSMUSG00000030793/ENSMUSG00000026981/ENSMUSG00000020115/ENSMUSG00000029254	Irf7/Hpx/Nlrc5/Il1r1/Irgm2/Parp14/Socs1/Zbp1/Sigirr/Apoa1/Irgm1/Gas6/Il7/Casp1/Pycard/Il1rn/Tbk1/Stap1	18	15	ENSMUSG00000025498/ENSMUSG00000030895/ENSMUSG00000074151/ENSMUSG00000069874/ENSMUSG00000034422/ENSMUSG00000038037/ENSMUSG00000027514/ENSMUSG00000025494/ENSMUSG00000046879/ENSMUSG00000031451/ENSMUSG00000040329/ENSMUSG00000025888/ENSMUSG00000030793/ENSMUSG00000026981/ENSMUSG00000020115	3	ENSMUSG00000026072/ENSMUSG00000032083/ENSMUSG00000029254
BP	GO:2001235	positive regulation of apoptotic signaling pathway	25|1102	169|14957	0.00063303	0.0104378	ENSMUSG00000002083/ENSMUSG00000040093/ENSMUSG00000036986/ENSMUSG00000030560/ENSMUSG00000021948/ENSMUSG00000057789/ENSMUSG00000041324/ENSMUSG00000024778/ENSMUSG00000024789/ENSMUSG00000056071/ENSMUSG00000031805/ENSMUSG00000028191/ENSMUSG00000003955/ENSMUSG00000054499/ENSMUSG00000027379/ENSMUSG00000032369/ENSMUSG00000039304/ENSMUSG00000020372/ENSMUSG00000045409/ENSMUSG00000038612/ENSMUSG00000030793/…	Bbc3/Bmf/Pml/Ctsc/Prkcd/Bak1/Inhba/Fas/Jak2/S100a9/Jak3/Bcl10/Fam162a/Dedd2/Bub1/Plscr1/Tnfsf10/Rack1/Trim39/Mcl1/Pycard/Adora2a/Atf3/Atpif1/Prkra	25	22	ENSMUSG00000002083/ENSMUSG00000040093/ENSMUSG00000036986/ENSMUSG00000030560/ENSMUSG00000021948/ENSMUSG00000057789/ENSMUSG00000024778/ENSMUSG00000024789/ENSMUSG00000056071/ENSMUSG00000031805/ENSMUSG00000028191/ENSMUSG00000003955/ENSMUSG00000054499/ENSMUSG00000027379/ENSMUSG00000032369/ENSMUSG00000039304/ENSMUSG00000038612/ENSMUSG00000030793/ENSMUSG00000020178/ENSMUSG00000026628/ENSMUSG00000054428/…	3	ENSMUSG00000041324/ENSMUSG00000020372/ENSMUSG00000045409
BP	GO:0019724	B cell mediated immunity	19|1102	114|14957	0.000635266	0.0104409	ENSMUSG00000029656/ENSMUSG00000025498/ENSMUSG00000030895/ENSMUSG00000001750/ENSMUSG00000022149/ENSMUSG00000021948/ENSMUSG00000023249/ENSMUSG00000026542/ENSMUSG00000015947/ENSMUSG00000024778/ENSMUSG00000053175/ENSMUSG00000041471/ENSMUSG00000035031/ENSMUSG00000028191/ENSMUSG00000000732/ENSMUSG00000032508/ENSMUSG00000058715/ENSMUSG00000055994/ENSMUSG00000037649	C8b/Irf7/Hpx/Tcirg1/C9/Prkcd/Parp3/Apcs/Fcgr1/Fas/Bcl3/Shld2/C8a/Bcl10/Icosl/Myd88/Fcer1g/Nod2/H2-DMa	19	15	ENSMUSG00000025498/ENSMUSG00000030895/ENSMUSG00000001750/ENSMUSG00000021948/ENSMUSG00000023249/ENSMUSG00000026542/ENSMUSG00000015947/ENSMUSG00000024778/ENSMUSG00000053175/ENSMUSG00000028191/ENSMUSG00000000732/ENSMUSG00000032508/ENSMUSG00000058715/ENSMUSG00000055994/ENSMUSG00000037649	4	ENSMUSG00000029656/ENSMUSG00000022149/ENSMUSG00000041471/ENSMUSG00000035031
BP	GO:0002700	regulation of production of molecular mediator of immune response	21|1102	132|14957	0.000640038	0.0104855	ENSMUSG00000030895/ENSMUSG00000026072/ENSMUSG00000042333/ENSMUSG00000049103/ENSMUSG00000039217/ENSMUSG00000023249/ENSMUSG00000032083/ENSMUSG00000041471/ENSMUSG00000027995/ENSMUSG00000024990/ENSMUSG00000040296/ENSMUSG00000031805/ENSMUSG00000031101/ENSMUSG00000047123/ENSMUSG00000031639/ENSMUSG00000058715/ENSMUSG00000055994/ENSMUSG00000037012/ENSMUSG00000031948/ENSMUSG00000019850/ENSMUSG00000032688	Hpx/Il1r1/Tnfrsf14/Ccr2/Il18/Parp3/Apoa1/Shld2/Tlr2/Rbp4/Ddx58/Jak3/Sash3/Ticam1/Tlr3/Fcer1g/Nod2/Hk1/Kars/Tnfaip3/Malt1	21	16	ENSMUSG00000030895/ENSMUSG00000042333/ENSMUSG00000049103/ENSMUSG00000039217/ENSMUSG00000023249/ENSMUSG00000027995/ENSMUSG00000040296/ENSMUSG00000031805/ENSMUSG00000031101/ENSMUSG00000031639/ENSMUSG00000058715/ENSMUSG00000055994/ENSMUSG00000037012/ENSMUSG00000031948/ENSMUSG00000019850/ENSMUSG00000032688	5	ENSMUSG00000026072/ENSMUSG00000032083/ENSMUSG00000041471/ENSMUSG00000024990/ENSMUSG00000047123
BP	GO:0042632	cholesterol homeostasis	15|1102	80|14957	0.000657528	0.0107375	ENSMUSG00000045294/ENSMUSG00000032080/ENSMUSG00000032193/ENSMUSG00000039217/ENSMUSG00000044254/ENSMUSG00000032083/ENSMUSG00000023022/ENSMUSG00000015243/ENSMUSG00000037278/ENSMUSG00000032114/ENSMUSG00000028553/ENSMUSG00000028158/ENSMUSG00000039519/ENSMUSG00000032079/ENSMUSG00000036391	Insig1/Apoa4/Ldlr/Il18/Pcsk9/Apoa1/Lima1/Abca1/Tmem97/Slc37a4/Angptl3/Mttp/Cyp7b1/Apoa5/Sec24a	15	6	ENSMUSG00000045294/ENSMUSG00000032193/ENSMUSG00000039217/ENSMUSG00000044254/ENSMUSG00000023022/ENSMUSG00000037278	9	ENSMUSG00000032080/ENSMUSG00000032083/ENSMUSG00000015243/ENSMUSG00000032114/ENSMUSG00000028553/ENSMUSG00000028158/ENSMUSG00000039519/ENSMUSG00000032079/ENSMUSG00000036391
BP	GO:1900017	positive regulation of cytokine production involved in inflammatory response	6|1102	16|14957	0.000663809	0.0108055	ENSMUSG00000030281/ENSMUSG00000047123/ENSMUSG00000032508/ENSMUSG00000105504/ENSMUSG00000055994/ENSMUSG00000031948	Il17rc/Ticam1/Myd88/Gbp5/Nod2/Kars	6	5	ENSMUSG00000030281/ENSMUSG00000032508/ENSMUSG00000105504/ENSMUSG00000055994/ENSMUSG00000031948	1	ENSMUSG00000047123
BP	GO:0009896	positive regulation of catabolic process	48|1102	404|14957	0.000682156	0.0109509	ENSMUSG00000069874/ENSMUSG00000055782/ENSMUSG00000030827/ENSMUSG00000030560/ENSMUSG00000002227/ENSMUSG00000021948/ENSMUSG00000032350/ENSMUSG00000032080/ENSMUSG00000032193/ENSMUSG00000044254/ENSMUSG00000090877/ENSMUSG00000046879/ENSMUSG00000038375/ENSMUSG00000000628/ENSMUSG00000027995/ENSMUSG00000031207/ENSMUSG00000031378/ENSMUSG00000091971/ENSMUSG00000028793/ENSMUSG00000032540/ENSMUSG00000041058/…	Irgm2/Abcd2/Fgf21/Ctsc/Mov10/Prkcd/Gclc/Apoa4/Ldlr/Pcsk9/Hspa1b/Irgm1/Trp53inp2/Hk2/Tlr2/Msn/Abcd1/Hspa1a/Rnf19b/Abhd5/Wwp1/Supt5/Zc3h12d/Zc3hav1/Igf1/Adora1/Ticam1/Gpd1/Gpld1/Angptl3/Mapk15/Bag2/Tpcn1/Plin5/Nod2/Rack1/Hsp90aa1/Pabpc1/Ddb1/Apoa5/Ecscr/Rnf19a/Tbk1/Tob1/Igfbp3/Tnfaip3/Atpif1/Gck	48	28	ENSMUSG00000069874/ENSMUSG00000055782/ENSMUSG00000030560/ENSMUSG00000002227/ENSMUSG00000021948/ENSMUSG00000032350/ENSMUSG00000032193/ENSMUSG00000044254/ENSMUSG00000090877/ENSMUSG00000046879/ENSMUSG00000000628/ENSMUSG00000027995/ENSMUSG00000031207/ENSMUSG00000031378/ENSMUSG00000091971/ENSMUSG00000028793/ENSMUSG00000039981/ENSMUSG00000029826/ENSMUSG00000042429/ENSMUSG00000063704/ENSMUSG00000042215/…	20	ENSMUSG00000030827/ENSMUSG00000032080/ENSMUSG00000038375/ENSMUSG00000032540/ENSMUSG00000041058/ENSMUSG00000003435/ENSMUSG00000020053/ENSMUSG00000047123/ENSMUSG00000023019/ENSMUSG00000021340/ENSMUSG00000028553/ENSMUSG00000032741/ENSMUSG00000011305/ENSMUSG00000020372/ENSMUSG00000022283/ENSMUSG00000024740/ENSMUSG00000032079/ENSMUSG00000022280/ENSMUSG00000020427/ENSMUSG00000041798
BP	GO:0000727	double-strand break repair via break-induced replication	5|1102	11|14957	0.000682426	0.0109509	ENSMUSG00000026355/ENSMUSG00000005410/ENSMUSG00000041859/ENSMUSG00000031821/ENSMUSG00000002870	Mcm6/Mcm5/Mcm3/Gins2/Mcm2	5	5	ENSMUSG00000026355/ENSMUSG00000005410/ENSMUSG00000041859/ENSMUSG00000031821/ENSMUSG00000002870	0
BP	GO:0006957	complement activation, alternative pathway	5|1102	11|14957	0.000682426	0.0109509	ENSMUSG00000029656/ENSMUSG00000022149/ENSMUSG00000035031/ENSMUSG00000090231/ENSMUSG00000044206	C8b/C9/C8a/Cfb/Vsig4	5	1	ENSMUSG00000090231	4	ENSMUSG00000029656/ENSMUSG00000022149/ENSMUSG00000035031/ENSMUSG00000044206
BP	GO:0045078	positive regulation of interferon-gamma biosynthetic process	5|1102	11|14957	0.000682426	0.0109509	ENSMUSG00000035914/ENSMUSG00000028076/ENSMUSG00000031639/ENSMUSG00000044701/ENSMUSG00000044583	Cd276/Cd1d1/Tlr3/Il27/Tlr7	5	4	ENSMUSG00000035914/ENSMUSG00000028076/ENSMUSG00000031639/ENSMUSG00000044701	1	ENSMUSG00000044583
BP	GO:0032102	negative regulation of response to external stimulus	38|1102	299|14957	0.000683491	0.0109509	ENSMUSG00000078817/ENSMUSG00000022126/ENSMUSG00000055782/ENSMUSG00000021948/ENSMUSG00000032193/ENSMUSG00000028064/ENSMUSG00000039384/ENSMUSG00000021451/ENSMUSG00000032231/ENSMUSG00000035914/ENSMUSG00000032083/ENSMUSG00000037362/ENSMUSG00000051457/ENSMUSG00000052270/ENSMUSG00000031378/ENSMUSG00000017830/ENSMUSG00000030341/ENSMUSG00000041939/ENSMUSG00000050350/ENSMUSG00000053318/ENSMUSG00000020053/…	Nlrp12/Acod1/Abcd2/Prkcd/Ldlr/Sema4a/Dusp10/Sema4d/Anxa2/Cd276/Apoa1/Nov/Spn/Fpr2/Abcd1/Dhx58/Tnfrsf1a/Mvk/Gpr18/Slamf8/Igf1/Adora1/Sirpa/Aif1/Tfpi/Nfkb1/Fem1a/Nod2/Traf3ip1/Pycard/Lgals9/Adora2a/Slit1/Inpp5f/Stap1/Tnfaip3/Psma1/F2	38	29	ENSMUSG00000022126/ENSMUSG00000055782/ENSMUSG00000021948/ENSMUSG00000032193/ENSMUSG00000028064/ENSMUSG00000039384/ENSMUSG00000021451/ENSMUSG00000032231/ENSMUSG00000035914/ENSMUSG00000037362/ENSMUSG00000051457/ENSMUSG00000052270/ENSMUSG00000031378/ENSMUSG00000017830/ENSMUSG00000030341/ENSMUSG00000041939/ENSMUSG00000050350/ENSMUSG00000053318/ENSMUSG00000042429/ENSMUSG00000037902/ENSMUSG00000024397/…	9	ENSMUSG00000078817/ENSMUSG00000032083/ENSMUSG00000020053/ENSMUSG00000043683/ENSMUSG00000034292/ENSMUSG00000025020/ENSMUSG00000042105/ENSMUSG00000029254/ENSMUSG00000027249
BP	GO:0032607	interferon-alpha production	8|1102	28|14957	0.000694562	0.0109889	ENSMUSG00000025498/ENSMUSG00000026104/ENSMUSG00000079363/ENSMUSG00000040296/ENSMUSG00000029826/ENSMUSG00000031639/ENSMUSG00000044583/ENSMUSG00000020115	Irf7/Stat1/Gbp4/Ddx58/Zc3hav1/Tlr3/Tlr7/Tbk1	8	7	ENSMUSG00000025498/ENSMUSG00000026104/ENSMUSG00000079363/ENSMUSG00000040296/ENSMUSG00000029826/ENSMUSG00000031639/ENSMUSG00000020115	1	ENSMUSG00000044583
BP	GO:0032816	positive regulation of natural killer cell activation	8|1102	28|14957	0.000694562	0.0109889	ENSMUSG00000039217/ENSMUSG00000004043/ENSMUSG00000018899/ENSMUSG00000031451/ENSMUSG00000027347/ENSMUSG00000047123/ENSMUSG00000079685/ENSMUSG00000025188	Il18/Stat5a/Irf1/Gas6/Rasgrp1/Ticam1/Ulbp1/Hps1	8	7	ENSMUSG00000039217/ENSMUSG00000004043/ENSMUSG00000018899/ENSMUSG00000031451/ENSMUSG00000027347/ENSMUSG00000079685/ENSMUSG00000025188	1	ENSMUSG00000047123
BP	GO:0009132	nucleoside diphosphate metabolic process	18|1102	106|14957	0.000695392	0.0109889	ENSMUSG00000017390/ENSMUSG00000020638/ENSMUSG00000032478/ENSMUSG00000028671/ENSMUSG00000036813/ENSMUSG00000000628/ENSMUSG00000036067/ENSMUSG00000032294/ENSMUSG00000020053/ENSMUSG00000025877/ENSMUSG00000023019/ENSMUSG00000041237/ENSMUSG00000041323/ENSMUSG00000025236/ENSMUSG00000004040/ENSMUSG00000037012/ENSMUSG00000021196/ENSMUSG00000041798	Aldoc/Cmpk2/Nme6/Gale/Entpd8/Hk2/Slc2a6/Pkm/Igf1/Hk3/Gpd1/Pklr/Ak7/Adpgk/Stat3/Hk1/Pfkp/Gck	18	11	ENSMUSG00000017390/ENSMUSG00000020638/ENSMUSG00000028671/ENSMUSG00000000628/ENSMUSG00000036067/ENSMUSG00000032294/ENSMUSG00000025877/ENSMUSG00000041323/ENSMUSG00000004040/ENSMUSG00000037012/ENSMUSG00000021196	7	ENSMUSG00000032478/ENSMUSG00000036813/ENSMUSG00000020053/ENSMUSG00000023019/ENSMUSG00000041237/ENSMUSG00000025236/ENSMUSG00000041798
BP	GO:0043280	positive regulation of cysteine-type endopeptidase activity involved in apoptotic process	18|1102	106|14957	0.000695392	0.0109889	ENSMUSG00000002083/ENSMUSG00000036986/ENSMUSG00000057789/ENSMUSG00000026104/ENSMUSG00000024778/ENSMUSG00000024789/ENSMUSG00000025887/ENSMUSG00000056071/ENSMUSG00000071369/ENSMUSG00000028191/ENSMUSG00000003955/ENSMUSG00000070390/ENSMUSG00000025888/ENSMUSG00000039304/ENSMUSG00000020372/ENSMUSG00000030793/ENSMUSG00000039193/ENSMUSG00000032688	Bbc3/Pml/Bak1/Stat1/Fas/Jak2/Casp12/S100a9/Map3k5/Bcl10/Fam162a/Nlrp1b/Casp1/Tnfsf10/Rack1/Pycard/Nlrc4/Malt1	18	16	ENSMUSG00000002083/ENSMUSG00000036986/ENSMUSG00000057789/ENSMUSG00000026104/ENSMUSG00000024778/ENSMUSG00000024789/ENSMUSG00000025887/ENSMUSG00000056071/ENSMUSG00000028191/ENSMUSG00000003955/ENSMUSG00000070390/ENSMUSG00000025888/ENSMUSG00000039304/ENSMUSG00000030793/ENSMUSG00000039193/ENSMUSG00000032688	2	ENSMUSG00000071369/ENSMUSG00000020372
BP	GO:0001906	cell killing	22|1102	142|14957	0.000696649	0.0109889	ENSMUSG00000067235/ENSMUSG00000030560/ENSMUSG00000022149/ENSMUSG00000020826/ENSMUSG00000039217/ENSMUSG00000015947/ENSMUSG00000004043/ENSMUSG00000037321/ENSMUSG00000035385/ENSMUSG00000115338/ENSMUSG00000045827/ENSMUSG00000030157/ENSMUSG00000028793/ENSMUSG00000028076/ENSMUSG00000027347/ENSMUSG00000030707/ENSMUSG00000023944/ENSMUSG00000001123/ENSMUSG00000079685/ENSMUSG00000029254/ENSMUSG00000056978/…	H2-Q10/Ctsc/C9/Nos2/Il18/Fcgr1/Stat5a/Tap1/Ccl2/Pnp/Serpinb9/Clec2d/Rnf19b/Cd1d1/Rasgrp1/Coro1a/Hsp90ab1/Lgals9/Ulbp1/Stap1/Hamp2/F2	22	19	ENSMUSG00000067235/ENSMUSG00000030560/ENSMUSG00000020826/ENSMUSG00000039217/ENSMUSG00000015947/ENSMUSG00000004043/ENSMUSG00000037321/ENSMUSG00000035385/ENSMUSG00000115338/ENSMUSG00000045827/ENSMUSG00000030157/ENSMUSG00000028793/ENSMUSG00000028076/ENSMUSG00000027347/ENSMUSG00000030707/ENSMUSG00000023944/ENSMUSG00000001123/ENSMUSG00000079685/ENSMUSG00000056978	3	ENSMUSG00000022149/ENSMUSG00000029254/ENSMUSG00000027249
BP	GO:0048525	negative regulation of viral process	16|1102	89|14957	0.000714806	0.0112405	ENSMUSG00000046718/ENSMUSG00000025492/ENSMUSG00000036986/ENSMUSG00000052776/ENSMUSG00000026542/ENSMUSG00000009585/ENSMUSG00000026104/ENSMUSG00000029561/ENSMUSG00000010175/ENSMUSG00000035692/ENSMUSG00000060591/ENSMUSG00000029826/ENSMUSG00000063268/ENSMUSG00000032369/ENSMUSG00000035042/ENSMUSG00000032661	Bst2/Ifitm3/Pml/Oas1a/Apcs/Apobec3/Stat1/Oasl2/Prox1/Isg15/Ifitm2/Zc3hav1/Parp10/Plscr1/Ccl5/Oas3	16	15	ENSMUSG00000046718/ENSMUSG00000025492/ENSMUSG00000036986/ENSMUSG00000052776/ENSMUSG00000026542/ENSMUSG00000009585/ENSMUSG00000026104/ENSMUSG00000029561/ENSMUSG00000035692/ENSMUSG00000060591/ENSMUSG00000029826/ENSMUSG00000063268/ENSMUSG00000032369/ENSMUSG00000035042/ENSMUSG00000032661	1	ENSMUSG00000010175
BP	GO:0006790	sulfur compound metabolic process	33|1102	249|14957	0.000726792	0.0113939	ENSMUSG00000032350/ENSMUSG00000058135/ENSMUSG00000029201/ENSMUSG00000020917/ENSMUSG00000058216/ENSMUSG00000068762/ENSMUSG00000025934/ENSMUSG00000004043/ENSMUSG00000042010/ENSMUSG00000032047/ENSMUSG00000074768/ENSMUSG00000031378/ENSMUSG00000018796/ENSMUSG00000028603/ENSMUSG00000027952/ENSMUSG00000072949/ENSMUSG00000034612/ENSMUSG00000041939/ENSMUSG00000057933/ENSMUSG00000035232/ENSMUSG00000030759/…	Gclc/Gstm1/Ugdh/Acly/Gstp3/Gstm6/Gsta3/Stat5a/Acacb/Acat1/Bhmt/Abcd1/Acsl1/Scp2/Pmvk/Acot1/Chst11/Mvk/Gsta2/Pdk3/Far1/Hmgcs2/Mpst/Gstp2/Acss2/Hmgcs1/Mmachc/Gstm4/Acsm3/Idh1/Hs3st3b1/Acot12/Nat8	33	20	ENSMUSG00000032350/ENSMUSG00000058135/ENSMUSG00000029201/ENSMUSG00000020917/ENSMUSG00000068762/ENSMUSG00000025934/ENSMUSG00000004043/ENSMUSG00000042010/ENSMUSG00000031378/ENSMUSG00000027952/ENSMUSG00000034612/ENSMUSG00000041939/ENSMUSG00000057933/ENSMUSG00000035232/ENSMUSG00000030759/ENSMUSG00000038155/ENSMUSG00000027605/ENSMUSG00000093930/ENSMUSG00000027890/ENSMUSG00000025950	13	ENSMUSG00000058216/ENSMUSG00000032047/ENSMUSG00000074768/ENSMUSG00000018796/ENSMUSG00000028603/ENSMUSG00000072949/ENSMUSG00000027875/ENSMUSG00000071711/ENSMUSG00000028690/ENSMUSG00000030935/ENSMUSG00000070407/ENSMUSG00000021620/ENSMUSG00000030004
BP	GO:0032727	positive regulation of interferon-alpha production	7|1102	22|14957	0.000736928	0.0114821	ENSMUSG00000025498/ENSMUSG00000026104/ENSMUSG00000040296/ENSMUSG00000029826/ENSMUSG00000031639/ENSMUSG00000044583/ENSMUSG00000020115	Irf7/Stat1/Ddx58/Zc3hav1/Tlr3/Tlr7/Tbk1	7	6	ENSMUSG00000025498/ENSMUSG00000026104/ENSMUSG00000040296/ENSMUSG00000029826/ENSMUSG00000031639/ENSMUSG00000020115	1	ENSMUSG00000044583
BP	GO:0042104	positive regulation of activated T cell proliferation	7|1102	22|14957	0.000736928	0.0114821	ENSMUSG00000039217/ENSMUSG00000004043/ENSMUSG00000039323/ENSMUSG00000031805/ENSMUSG00000020053/ENSMUSG00000000732/ENSMUSG00000030793	Il18/Stat5a/Igfbp2/Jak3/Igf1/Icosl/Pycard	7	5	ENSMUSG00000039217/ENSMUSG00000004043/ENSMUSG00000031805/ENSMUSG00000000732/ENSMUSG00000030793	2	ENSMUSG00000039323/ENSMUSG00000020053
BP	GO:0002224	toll-like receptor signaling pathway	17|1102	98|14957	0.000754917	0.0116458	ENSMUSG00000025498/ENSMUSG00000022126/ENSMUSG00000036908/ENSMUSG00000016024/ENSMUSG00000018899/ENSMUSG00000027995/ENSMUSG00000051439/ENSMUSG00000059714/ENSMUSG00000028191/ENSMUSG00000047123/ENSMUSG00000032508/ENSMUSG00000031639/ENSMUSG00000055994/ENSMUSG00000044827/ENSMUSG00000001123/ENSMUSG00000044583/ENSMUSG00000019850	Irf7/Acod1/Unc93b1/Lbp/Irf1/Tlr2/Cd14/Flot1/Bcl10/Ticam1/Myd88/Tlr3/Nod2/Tlr1/Lgals9/Tlr7/Tnfaip3	17	15	ENSMUSG00000025498/ENSMUSG00000022126/ENSMUSG00000036908/ENSMUSG00000016024/ENSMUSG00000018899/ENSMUSG00000027995/ENSMUSG00000051439/ENSMUSG00000059714/ENSMUSG00000028191/ENSMUSG00000032508/ENSMUSG00000031639/ENSMUSG00000055994/ENSMUSG00000044827/ENSMUSG00000001123/ENSMUSG00000019850	2	ENSMUSG00000047123/ENSMUSG00000044583
BP	GO:0060337	type I interferon signaling pathway	9|1102	35|14957	0.000758864	0.0116458	ENSMUSG00000025498/ENSMUSG00000074151/ENSMUSG00000025492/ENSMUSG00000027514/ENSMUSG00000026104/ENSMUSG00000040033/ENSMUSG00000060591/ENSMUSG00000032508/ENSMUSG00000020115	Irf7/Nlrc5/Ifitm3/Zbp1/Stat1/Stat2/Ifitm2/Myd88/Tbk1	9	9	ENSMUSG00000025498/ENSMUSG00000074151/ENSMUSG00000025492/ENSMUSG00000027514/ENSMUSG00000026104/ENSMUSG00000040033/ENSMUSG00000060591/ENSMUSG00000032508/ENSMUSG00000020115	0
BP	GO:0071357	cellular response to type I interferon	9|1102	35|14957	0.000758864	0.0116458	ENSMUSG00000025498/ENSMUSG00000074151/ENSMUSG00000025492/ENSMUSG00000027514/ENSMUSG00000026104/ENSMUSG00000040033/ENSMUSG00000060591/ENSMUSG00000032508/ENSMUSG00000020115	Irf7/Nlrc5/Ifitm3/Zbp1/Stat1/Stat2/Ifitm2/Myd88/Tbk1	9	9	ENSMUSG00000025498/ENSMUSG00000074151/ENSMUSG00000025492/ENSMUSG00000027514/ENSMUSG00000026104/ENSMUSG00000040033/ENSMUSG00000060591/ENSMUSG00000032508/ENSMUSG00000020115	0
BP	GO:0071825	protein-lipid complex subunit organization	9|1102	35|14957	0.000758864	0.0116458	ENSMUSG00000017754/ENSMUSG00000032080/ENSMUSG00000032883/ENSMUSG00000057074/ENSMUSG00000032083/ENSMUSG00000015243/ENSMUSG00000023913/ENSMUSG00000028158/ENSMUSG00000032079	Pltp/Apoa4/Acsl3/Ces1g/Apoa1/Abca1/Pla2g7/Mttp/Apoa5	9	2	ENSMUSG00000032883/ENSMUSG00000057074	7	ENSMUSG00000017754/ENSMUSG00000032080/ENSMUSG00000032083/ENSMUSG00000015243/ENSMUSG00000023913/ENSMUSG00000028158/ENSMUSG00000032079
BP	GO:2000403	positive regulation of lymphocyte migration	9|1102	35|14957	0.000758864	0.0116458	ENSMUSG00000042333/ENSMUSG00000049103/ENSMUSG00000027009/ENSMUSG00000051457/ENSMUSG00000034855/ENSMUSG00000024397/ENSMUSG00000035042/ENSMUSG00000030793/ENSMUSG00000001123	Tnfrsf14/Ccr2/Itga4/Spn/Cxcl10/Aif1/Ccl5/Pycard/Lgals9	9	9	ENSMUSG00000042333/ENSMUSG00000049103/ENSMUSG00000027009/ENSMUSG00000051457/ENSMUSG00000034855/ENSMUSG00000024397/ENSMUSG00000035042/ENSMUSG00000030793/ENSMUSG00000001123	0
BP	GO:1901568	fatty acid derivative metabolic process	19|1102	116|14957	0.000791257	0.0121065	ENSMUSG00000003053/ENSMUSG00000027533/ENSMUSG00000042248/ENSMUSG00000060613/ENSMUSG00000062624/ENSMUSG00000060407/ENSMUSG00000027995/ENSMUSG00000032047/ENSMUSG00000054827/ENSMUSG00000031378/ENSMUSG00000018796/ENSMUSG00000030341/ENSMUSG00000025002/ENSMUSG00000007036/ENSMUSG00000030483/ENSMUSG00000074882/ENSMUSG00000030759/ENSMUSG00000022186/ENSMUSG00000052914	Cyp2c29/Fabp5/Cyp2c37/Cyp2c70/Cyp2c67/Cyp2a12/Tlr2/Acat1/Cyp2c50/Abcd1/Acsl1/Tnfrsf1a/Cyp2c55/Abhd16a/Cyp2b10/Cyp2c68/Far1/Oxct1/Cyp2j6	19	11	ENSMUSG00000003053/ENSMUSG00000042248/ENSMUSG00000027995/ENSMUSG00000054827/ENSMUSG00000031378/ENSMUSG00000030341/ENSMUSG00000025002/ENSMUSG00000007036/ENSMUSG00000030483/ENSMUSG00000030759/ENSMUSG00000022186	8	ENSMUSG00000027533/ENSMUSG00000060613/ENSMUSG00000062624/ENSMUSG00000060407/ENSMUSG00000032047/ENSMUSG00000018796/ENSMUSG00000074882/ENSMUSG00000052914
BP	GO:0030098	lymphocyte differentiation	41|1102	333|14957	0.000814243	0.0124209	ENSMUSG00000068220/ENSMUSG00000001750/ENSMUSG00000049103/ENSMUSG00000057789/ENSMUSG00000039217/ENSMUSG00000038037/ENSMUSG00000028064/ENSMUSG00000039384/ENSMUSG00000004043/ENSMUSG00000002983/ENSMUSG00000025314/ENSMUSG00000018899/ENSMUSG00000051457/ENSMUSG00000024778/ENSMUSG00000039153/ENSMUSG00000053175/ENSMUSG00000014905/ENSMUSG00000035247/ENSMUSG00000115338/ENSMUSG00000031451/ENSMUSG00000028076/…	Lgals1/Tcirg1/Ccr2/Bak1/Il18/Socs1/Sema4a/Dusp10/Stat5a/Relb/Ptprj/Irf1/Spn/Fas/Runx2/Bcl3/Dnajb9/Hectd1/Pnp/Gas6/Cd1d1/Jak3/Wwp1/Gpr18/Il7/Slamf8/Sash3/Rasgrp1/Braf/Plcg2/Fcer1g/Fanca/Stat3/Il27/Lgals9/Hsp90aa1/Dock2/Tnfaip3/H2-DMa/Tnfsf8/Malt1	41	37	ENSMUSG00000068220/ENSMUSG00000001750/ENSMUSG00000049103/ENSMUSG00000057789/ENSMUSG00000039217/ENSMUSG00000038037/ENSMUSG00000028064/ENSMUSG00000039384/ENSMUSG00000004043/ENSMUSG00000002983/ENSMUSG00000025314/ENSMUSG00000018899/ENSMUSG00000051457/ENSMUSG00000024778/ENSMUSG00000039153/ENSMUSG00000053175/ENSMUSG00000115338/ENSMUSG00000031451/ENSMUSG00000028076/ENSMUSG00000031805/ENSMUSG00000050350/…	4	ENSMUSG00000014905/ENSMUSG00000035247/ENSMUSG00000041058/ENSMUSG00000002413
BP	GO:0002833	positive regulation of response to biotic stimulus	11|1102	50|14957	0.00085414	0.0129519	ENSMUSG00000022126/ENSMUSG00000021624/ENSMUSG00000027995/ENSMUSG00000016496/ENSMUSG00000017830/ENSMUSG00000029826/ENSMUSG00000037921/ENSMUSG00000055994/ENSMUSG00000001123/ENSMUSG00000079685/ENSMUSG00000020115	Acod1/Cd180/Tlr2/Cd274/Dhx58/Zc3hav1/Ddx60/Nod2/Lgals9/Ulbp1/Tbk1	11	11	ENSMUSG00000022126/ENSMUSG00000021624/ENSMUSG00000027995/ENSMUSG00000016496/ENSMUSG00000017830/ENSMUSG00000029826/ENSMUSG00000037921/ENSMUSG00000055994/ENSMUSG00000001123/ENSMUSG00000079685/ENSMUSG00000020115	0
BP	GO:0034113	heterotypic cell-cell adhesion	11|1102	50|14957	0.00085414	0.0129519	ENSMUSG00000030789/ENSMUSG00000027009/ENSMUSG00000032083/ENSMUSG00000059714/ENSMUSG00000000290/ENSMUSG00000068566/ENSMUSG00000026981/ENSMUSG00000022865/ENSMUSG00000054889/ENSMUSG00000019850/ENSMUSG00000024331	Itgax/Itga4/Apoa1/Flot1/Itgb2/Myadm/Il1rn/Cxadr/Dsp/Tnfaip3/Dsc2	11	10	ENSMUSG00000030789/ENSMUSG00000027009/ENSMUSG00000059714/ENSMUSG00000000290/ENSMUSG00000068566/ENSMUSG00000026981/ENSMUSG00000022865/ENSMUSG00000054889/ENSMUSG00000019850/ENSMUSG00000024331	1	ENSMUSG00000032083
BP	GO:0002440	production of molecular mediator of immune response	27|1102	192|14957	0.000872413	0.0131897	ENSMUSG00000030895/ENSMUSG00000026072/ENSMUSG00000001750/ENSMUSG00000042333/ENSMUSG00000049103/ENSMUSG00000039217/ENSMUSG00000023249/ENSMUSG00000032083/ENSMUSG00000024778/ENSMUSG00000014905/ENSMUSG00000041471/ENSMUSG00000027995/ENSMUSG00000031451/ENSMUSG00000024990/ENSMUSG00000040296/ENSMUSG00000031805/ENSMUSG00000031101/ENSMUSG00000047123/ENSMUSG00000000732/ENSMUSG00000031639/ENSMUSG00000031497/…	Hpx/Il1r1/Tcirg1/Tnfrsf14/Ccr2/Il18/Parp3/Apoa1/Fas/Dnajb9/Shld2/Tlr2/Gas6/Rbp4/Ddx58/Jak3/Sash3/Ticam1/Icosl/Tlr3/Tnfsf13b/Fcer1g/Nod2/Hk1/Kars/Tnfaip3/Malt1	27	21	ENSMUSG00000030895/ENSMUSG00000001750/ENSMUSG00000042333/ENSMUSG00000049103/ENSMUSG00000039217/ENSMUSG00000023249/ENSMUSG00000024778/ENSMUSG00000027995/ENSMUSG00000031451/ENSMUSG00000040296/ENSMUSG00000031805/ENSMUSG00000031101/ENSMUSG00000000732/ENSMUSG00000031639/ENSMUSG00000031497/ENSMUSG00000058715/ENSMUSG00000055994/ENSMUSG00000037012/ENSMUSG00000031948/ENSMUSG00000019850/ENSMUSG00000032688	6	ENSMUSG00000026072/ENSMUSG00000032083/ENSMUSG00000014905/ENSMUSG00000041471/ENSMUSG00000024990/ENSMUSG00000047123
BP	GO:0051345	positive regulation of hydrolase activity	53|1102	463|14957	0.000884358	0.0133308	ENSMUSG00000038351/ENSMUSG00000002083/ENSMUSG00000079197/ENSMUSG00000026024/ENSMUSG00000036986/ENSMUSG00000028039/ENSMUSG00000021948/ENSMUSG00000022216/ENSMUSG00000057789/ENSMUSG00000037405/ENSMUSG00000032080/ENSMUSG00000021451/ENSMUSG00000005483/ENSMUSG00000030865/ENSMUSG00000026104/ENSMUSG00000032083/ENSMUSG00000029032/ENSMUSG00000024778/ENSMUSG00000035385/ENSMUSG00000024789/ENSMUSG00000025887/…	Sgsm2/Bbc3/Psme2/Als2/Pml/Efna3/Prkcd/Psme1/Bak1/Icam1/Apoa4/Sema4d/Dnajb1/Chp2/Stat1/Apoa1/Arhgef16/Fas/Ccl2/Jak2/Casp12/Ttbk1/S100a9/Map3k5/Cyfip2/Abhd5/Hmgb2/Zc3hav1/Rasgrp1/Bcl10/Fam162a/Nlrp1b/Hsp90ab1/Plek/Casp1/Plin5/Plscr1/Arhgap42/Rangap1/Stat3/Tnfsf10/Ccl5/Rack1/Pycard/Kars/Arhgef5/Apoa5/Srgap2/Nlrc4/Dnajc10/Rhog/Rpl5/Malt1	53	40	ENSMUSG00000038351/ENSMUSG00000002083/ENSMUSG00000079197/ENSMUSG00000036986/ENSMUSG00000028039/ENSMUSG00000021948/ENSMUSG00000022216/ENSMUSG00000057789/ENSMUSG00000037405/ENSMUSG00000021451/ENSMUSG00000005483/ENSMUSG00000026104/ENSMUSG00000029032/ENSMUSG00000024778/ENSMUSG00000035385/ENSMUSG00000024789/ENSMUSG00000025887/ENSMUSG00000056071/ENSMUSG00000020340/ENSMUSG00000054717/ENSMUSG00000029826/…	13	ENSMUSG00000026024/ENSMUSG00000032080/ENSMUSG00000030865/ENSMUSG00000032083/ENSMUSG00000015599/ENSMUSG00000071369/ENSMUSG00000032540/ENSMUSG00000011305/ENSMUSG00000050730/ENSMUSG00000022391/ENSMUSG00000020372/ENSMUSG00000032079/ENSMUSG00000058558
BP	GO:0043367	CD4-positive, alpha-beta T cell differentiation	14|1102	74|14957	0.000896697	0.0133766	ENSMUSG00000049103/ENSMUSG00000039217/ENSMUSG00000038037/ENSMUSG00000028064/ENSMUSG00000002983/ENSMUSG00000018899/ENSMUSG00000051457/ENSMUSG00000053175/ENSMUSG00000031805/ENSMUSG00000031101/ENSMUSG00000002413/ENSMUSG00000004040/ENSMUSG00000044701/ENSMUSG00000032688	Ccr2/Il18/Socs1/Sema4a/Relb/Irf1/Spn/Bcl3/Jak3/Sash3/Braf/Stat3/Il27/Malt1	14	13	ENSMUSG00000049103/ENSMUSG00000039217/ENSMUSG00000038037/ENSMUSG00000028064/ENSMUSG00000002983/ENSMUSG00000018899/ENSMUSG00000051457/ENSMUSG00000053175/ENSMUSG00000031805/ENSMUSG00000031101/ENSMUSG00000004040/ENSMUSG00000044701/ENSMUSG00000032688	1	ENSMUSG00000002413
BP	GO:0042533	tumor necrosis factor biosynthetic process	8|1102	29|14957	0.000897899	0.0133766	ENSMUSG00000049103/ENSMUSG00000016024/ENSMUSG00000051457/ENSMUSG00000053175/ENSMUSG00000024789/ENSMUSG00000027995/ENSMUSG00000004951/ENSMUSG00000044827	Ccr2/Lbp/Spn/Bcl3/Jak2/Tlr2/Hspb1/Tlr1	8	8	ENSMUSG00000049103/ENSMUSG00000016024/ENSMUSG00000051457/ENSMUSG00000053175/ENSMUSG00000024789/ENSMUSG00000027995/ENSMUSG00000004951/ENSMUSG00000044827	0
BP	GO:0042534	regulation of tumor necrosis factor biosynthetic process	8|1102	29|14957	0.000897899	0.0133766	ENSMUSG00000049103/ENSMUSG00000016024/ENSMUSG00000051457/ENSMUSG00000053175/ENSMUSG00000024789/ENSMUSG00000027995/ENSMUSG00000004951/ENSMUSG00000044827	Ccr2/Lbp/Spn/Bcl3/Jak2/Tlr2/Hspb1/Tlr1	8	8	ENSMUSG00000049103/ENSMUSG00000016024/ENSMUSG00000051457/ENSMUSG00000053175/ENSMUSG00000024789/ENSMUSG00000027995/ENSMUSG00000004951/ENSMUSG00000044827	0
BP	GO:0050716	positive regulation of interleukin-1 secretion	8|1102	29|14957	0.000897899	0.0133766	ENSMUSG00000022575/ENSMUSG00000031934/ENSMUSG00000027995/ENSMUSG00000070390/ENSMUSG00000025888/ENSMUSG00000055994/ENSMUSG00000037012/ENSMUSG00000030793	Gsdmd/Panx1/Tlr2/Nlrp1b/Casp1/Nod2/Hk1/Pycard	8	8	ENSMUSG00000022575/ENSMUSG00000031934/ENSMUSG00000027995/ENSMUSG00000070390/ENSMUSG00000025888/ENSMUSG00000055994/ENSMUSG00000037012/ENSMUSG00000030793	0
BP	GO:0051047	positive regulation of secretion	48|1102	410|14957	0.000940606	0.013972	ENSMUSG00000027808/ENSMUSG00000027577/ENSMUSG00000042333/ENSMUSG00000036908/ENSMUSG00000032883/ENSMUSG00000029915/ENSMUSG00000020122/ENSMUSG00000035914/ENSMUSG00000022575/ENSMUSG00000031934/ENSMUSG00000019066/ENSMUSG00000024789/ENSMUSG00000049044/ENSMUSG00000027995/ENSMUSG00000016496/ENSMUSG00000028874/ENSMUSG00000051439/ENSMUSG00000024990/ENSMUSG00000056071/ENSMUSG00000040296/ENSMUSG00000061665/…	Serp1/Chrna4/Tnfrsf14/Unc93b1/Acsl3/Clec5a/Egfr/Cd276/Gsdmd/Panx1/Rab3d/Jak2/Rapgef4/Tlr2/Cd274/Fgr/Cd14/Rbp4/S100a9/Ddx58/Cd2ap/Itgb2/Rasgrp1/Igf1/Nlrp1b/Il17rc/Adora1/Aif1/Gpld1/Gnai2/Lgals3/Casp1/Fcer1g/Dpysl2/Oxct1/Nod2/Tlr1/Hk1/Il1rap/Pycard/Lgals9/Kars/Adora2a/Sec24a/Hcar2/Cyp2j6/Gck/C2cd2l	48	37	ENSMUSG00000027577/ENSMUSG00000042333/ENSMUSG00000036908/ENSMUSG00000032883/ENSMUSG00000029915/ENSMUSG00000035914/ENSMUSG00000022575/ENSMUSG00000031934/ENSMUSG00000019066/ENSMUSG00000024789/ENSMUSG00000027995/ENSMUSG00000016496/ENSMUSG00000028874/ENSMUSG00000051439/ENSMUSG00000056071/ENSMUSG00000040296/ENSMUSG00000061665/ENSMUSG00000000290/ENSMUSG00000027347/ENSMUSG00000070390/ENSMUSG00000030281/…	11	ENSMUSG00000027808/ENSMUSG00000020122/ENSMUSG00000049044/ENSMUSG00000024990/ENSMUSG00000020053/ENSMUSG00000021340/ENSMUSG00000022514/ENSMUSG00000036391/ENSMUSG00000052914/ENSMUSG00000041798/ENSMUSG00000032120
BP	GO:0001776	leukocyte homeostasis	17|1102	100|14957	0.000955514	0.0141522	ENSMUSG00000031628/ENSMUSG00000001750/ENSMUSG00000049103/ENSMUSG00000057789/ENSMUSG00000039217/ENSMUSG00000004043/ENSMUSG00000024778/ENSMUSG00000035385/ENSMUSG00000031805/ENSMUSG00000032114/ENSMUSG00000102037/ENSMUSG00000028191/ENSMUSG00000030707/ENSMUSG00000031497/ENSMUSG00000058715/ENSMUSG00000045502/ENSMUSG00000019850	Casp3/Tcirg1/Ccr2/Bak1/Il18/Stat5a/Fas/Ccl2/Jak3/Slc37a4/Bcl2a1a/Bcl10/Coro1a/Tnfsf13b/Fcer1g/Hcar2/Tnfaip3	17	16	ENSMUSG00000031628/ENSMUSG00000001750/ENSMUSG00000049103/ENSMUSG00000057789/ENSMUSG00000039217/ENSMUSG00000004043/ENSMUSG00000024778/ENSMUSG00000035385/ENSMUSG00000031805/ENSMUSG00000102037/ENSMUSG00000028191/ENSMUSG00000030707/ENSMUSG00000031497/ENSMUSG00000058715/ENSMUSG00000045502/ENSMUSG00000019850	1	ENSMUSG00000032114
BP	GO:0033033	negative regulation of myeloid cell apoptotic process	6|1102	17|14957	0.000962342	0.014212	ENSMUSG00000039217/ENSMUSG00000029915/ENSMUSG00000004043/ENSMUSG00000058715/ENSMUSG00000055994/ENSMUSG00000035042	Il18/Clec5a/Stat5a/Fcer1g/Nod2/Ccl5	6	6	ENSMUSG00000039217/ENSMUSG00000029915/ENSMUSG00000004043/ENSMUSG00000058715/ENSMUSG00000055994/ENSMUSG00000035042	0
BP	GO:0030217	T cell differentiation	32|1102	243|14957	0.000967602	0.0142484	ENSMUSG00000001750/ENSMUSG00000049103/ENSMUSG00000039217/ENSMUSG00000038037/ENSMUSG00000028064/ENSMUSG00000039384/ENSMUSG00000004043/ENSMUSG00000002983/ENSMUSG00000018899/ENSMUSG00000051457/ENSMUSG00000024778/ENSMUSG00000039153/ENSMUSG00000053175/ENSMUSG00000115338/ENSMUSG00000028076/ENSMUSG00000031805/ENSMUSG00000041058/ENSMUSG00000050350/ENSMUSG00000040329/ENSMUSG00000031101/ENSMUSG00000027347/…	Tcirg1/Ccr2/Il18/Socs1/Sema4a/Dusp10/Stat5a/Relb/Irf1/Spn/Fas/Runx2/Bcl3/Pnp/Cd1d1/Jak3/Wwp1/Gpr18/Il7/Sash3/Rasgrp1/Braf/Fcer1g/Fanca/Stat3/Il27/Lgals9/Hsp90aa1/Dock2/H2-DMa/Tnfsf8/Malt1	32	30	ENSMUSG00000001750/ENSMUSG00000049103/ENSMUSG00000039217/ENSMUSG00000038037/ENSMUSG00000028064/ENSMUSG00000039384/ENSMUSG00000004043/ENSMUSG00000002983/ENSMUSG00000018899/ENSMUSG00000051457/ENSMUSG00000024778/ENSMUSG00000039153/ENSMUSG00000053175/ENSMUSG00000115338/ENSMUSG00000028076/ENSMUSG00000031805/ENSMUSG00000050350/ENSMUSG00000040329/ENSMUSG00000031101/ENSMUSG00000027347/ENSMUSG00000058715/…	2	ENSMUSG00000041058/ENSMUSG00000002413
BP	GO:0009165	nucleotide biosynthetic process	33|1102	254|14957	0.0010269	0.0150438	ENSMUSG00000013629/ENSMUSG00000017390/ENSMUSG00000020826/ENSMUSG00000020638/ENSMUSG00000023982/ENSMUSG00000020917/ENSMUSG00000052776/ENSMUSG00000037847/ENSMUSG00000032478/ENSMUSG00000029561/ENSMUSG00000028671/ENSMUSG00000115338/ENSMUSG00000000628/ENSMUSG00000042010/ENSMUSG00000032047/ENSMUSG00000018796/ENSMUSG00000036067/ENSMUSG00000064354/ENSMUSG00000032294/ENSMUSG00000035232/ENSMUSG00000020053/…	Cad/Aldoc/Nos2/Cmpk2/Guca1a/Acly/Oas1a/Nmrk1/Nme6/Oasl2/Gale/Pnp/Hk2/Acacb/Acat1/Acsl1/Slc2a6/mt-Co2/Pkm/Pdk3/Igf1/Hk3/Gpd1/Pklr/Acss2/Adpgk/Stat3/Pank4/Hk1/Kars/Pfkp/Ctps2/Gck	33	22	ENSMUSG00000017390/ENSMUSG00000020826/ENSMUSG00000020638/ENSMUSG00000023982/ENSMUSG00000020917/ENSMUSG00000052776/ENSMUSG00000029561/ENSMUSG00000028671/ENSMUSG00000115338/ENSMUSG00000000628/ENSMUSG00000042010/ENSMUSG00000036067/ENSMUSG00000064354/ENSMUSG00000032294/ENSMUSG00000035232/ENSMUSG00000025877/ENSMUSG00000027605/ENSMUSG00000004040/ENSMUSG00000037012/ENSMUSG00000031948/ENSMUSG00000021196/…	11	ENSMUSG00000013629/ENSMUSG00000037847/ENSMUSG00000032478/ENSMUSG00000032047/ENSMUSG00000018796/ENSMUSG00000020053/ENSMUSG00000023019/ENSMUSG00000041237/ENSMUSG00000025236/ENSMUSG00000029056/ENSMUSG00000041798
BP	GO:0002521	leukocyte differentiation	55|1102	488|14957	0.00102752	0.0150438	ENSMUSG00000068220/ENSMUSG00000001750/ENSMUSG00000023367/ENSMUSG00000039699/ENSMUSG00000035186/ENSMUSG00000049103/ENSMUSG00000057789/ENSMUSG00000029810/ENSMUSG00000039217/ENSMUSG00000038037/ENSMUSG00000028064/ENSMUSG00000039384/ENSMUSG00000026542/ENSMUSG00000032231/ENSMUSG00000038387/ENSMUSG00000004043/ENSMUSG00000002983/ENSMUSG00000022831/ENSMUSG00000025314/ENSMUSG00000018899/ENSMUSG00000051457/…	Lgals1/Tcirg1/Tmem176a/Batf2/Ubd/Ccr2/Bak1/Tmem176b/Il18/Socs1/Sema4a/Dusp10/Apcs/Anxa2/Rras/Stat5a/Relb/Hcls1/Ptprj/Irf1/Spn/Fas/Runx2/Bcl3/Junb/Dnajb9/Hectd1/Pnp/Tlr2/Clec2d/Gas6/Cd1d1/Jak3/Wwp1/Gpr18/Il7/Slamf8/Sash3/Rasgrp1/Braf/Plcg2/Fcer1g/Lbr/Fanca/Stat3/Ccl5/Il27/Lgals9/Hsp90aa1/Ccr1/Dock2/Tnfaip3/H2-DMa/Tnfsf8/Malt1	55	51	ENSMUSG00000068220/ENSMUSG00000001750/ENSMUSG00000023367/ENSMUSG00000039699/ENSMUSG00000035186/ENSMUSG00000049103/ENSMUSG00000057789/ENSMUSG00000029810/ENSMUSG00000039217/ENSMUSG00000038037/ENSMUSG00000028064/ENSMUSG00000039384/ENSMUSG00000026542/ENSMUSG00000032231/ENSMUSG00000038387/ENSMUSG00000004043/ENSMUSG00000002983/ENSMUSG00000022831/ENSMUSG00000025314/ENSMUSG00000018899/ENSMUSG00000051457/…	4	ENSMUSG00000014905/ENSMUSG00000035247/ENSMUSG00000041058/ENSMUSG00000002413
BP	GO:0006959	humoral immune response	20|1102	128|14957	0.001073	0.0156646	ENSMUSG00000015451/ENSMUSG00000029656/ENSMUSG00000030895/ENSMUSG00000029417/ENSMUSG00000022126/ENSMUSG00000022181/ENSMUSG00000026938/ENSMUSG00000022149/ENSMUSG00000049103/ENSMUSG00000026542/ENSMUSG00000053175/ENSMUSG00000035385/ENSMUSG00000035031/ENSMUSG00000056071/ENSMUSG00000034855/ENSMUSG00000090231/ENSMUSG00000055994/ENSMUSG00000044206/ENSMUSG00000037649/ENSMUSG00000027249	C4a/C8b/Hpx/Cxcl9/Acod1/C6/Fcna/C9/Ccr2/Apcs/Bcl3/Ccl2/C8a/S100a9/Cxcl10/Cfb/Nod2/Vsig4/H2-DMa/F2	20	12	ENSMUSG00000030895/ENSMUSG00000029417/ENSMUSG00000022126/ENSMUSG00000049103/ENSMUSG00000026542/ENSMUSG00000053175/ENSMUSG00000035385/ENSMUSG00000056071/ENSMUSG00000034855/ENSMUSG00000090231/ENSMUSG00000055994/ENSMUSG00000037649	8	ENSMUSG00000015451/ENSMUSG00000029656/ENSMUSG00000022181/ENSMUSG00000026938/ENSMUSG00000022149/ENSMUSG00000035031/ENSMUSG00000044206/ENSMUSG00000027249
BP	GO:0045072	regulation of interferon-gamma biosynthetic process	5|1102	12|14957	0.00109915	0.0159095	ENSMUSG00000035914/ENSMUSG00000028076/ENSMUSG00000031639/ENSMUSG00000044701/ENSMUSG00000044583	Cd276/Cd1d1/Tlr3/Il27/Tlr7	5	4	ENSMUSG00000035914/ENSMUSG00000028076/ENSMUSG00000031639/ENSMUSG00000044701	1	ENSMUSG00000044583
BP	GO:0050711	negative regulation of interleukin-1 secretion	5|1102	12|14957	0.00109915	0.0159095	ENSMUSG00000078817/ENSMUSG00000036986/ENSMUSG00000032083/ENSMUSG00000031451/ENSMUSG00000019850	Nlrp12/Pml/Apoa1/Gas6/Tnfaip3	5	3	ENSMUSG00000036986/ENSMUSG00000031451/ENSMUSG00000019850	2	ENSMUSG00000078817/ENSMUSG00000032083
BP	GO:0070269	pyroptosis	5|1102	12|14957	0.00109915	0.0159095	ENSMUSG00000022575/ENSMUSG00000070390/ENSMUSG00000025888/ENSMUSG00000078945/ENSMUSG00000039193	Gsdmd/Nlrp1b/Casp1/Naip2/Nlrc4	5	5	ENSMUSG00000022575/ENSMUSG00000070390/ENSMUSG00000025888/ENSMUSG00000078945/ENSMUSG00000039193	0
BP	GO:0042088	T-helper 1 type immune response	10|1102	44|14957	0.00111482	0.0160452	ENSMUSG00000026072/ENSMUSG00000049103/ENSMUSG00000039217/ENSMUSG00000028064/ENSMUSG00000002983/ENSMUSG00000018899/ENSMUSG00000051457/ENSMUSG00000053175/ENSMUSG00000031805/ENSMUSG00000044701	Il1r1/Ccr2/Il18/Sema4a/Relb/Irf1/Spn/Bcl3/Jak3/Il27	10	9	ENSMUSG00000049103/ENSMUSG00000039217/ENSMUSG00000028064/ENSMUSG00000002983/ENSMUSG00000018899/ENSMUSG00000051457/ENSMUSG00000053175/ENSMUSG00000031805/ENSMUSG00000044701	1	ENSMUSG00000026072
BP	GO:0090207	regulation of triglyceride metabolic process	10|1102	44|14957	0.00111482	0.0160452	ENSMUSG00000030827/ENSMUSG00000032080/ENSMUSG00000032193/ENSMUSG00000041567/ENSMUSG00000057074/ENSMUSG00000032540/ENSMUSG00000021340/ENSMUSG00000048486/ENSMUSG00000011305/ENSMUSG00000032079	Fgf21/Apoa4/Ldlr/Serpina12/Ces1g/Abhd5/Gpld1/Fitm2/Plin5/Apoa5	10	2	ENSMUSG00000032193/ENSMUSG00000057074	8	ENSMUSG00000030827/ENSMUSG00000032080/ENSMUSG00000041567/ENSMUSG00000032540/ENSMUSG00000021340/ENSMUSG00000048486/ENSMUSG00000011305/ENSMUSG00000032079
BP	GO:0045047	protein targeting to ER	8|1102	30|14957	0.00114629	0.0164517	ENSMUSG00000030082/ENSMUSG00000020780/ENSMUSG00000036323/ENSMUSG00000019802/ENSMUSG00000032042/ENSMUSG00000027828/ENSMUSG00000025935/ENSMUSG00000038467	Sec61a1/Srp68/Srp72/Sec63/Srpr/Ssr3/Tram1/Chmp4b	8	1	ENSMUSG00000038467	7	ENSMUSG00000030082/ENSMUSG00000020780/ENSMUSG00000036323/ENSMUSG00000019802/ENSMUSG00000032042/ENSMUSG00000027828/ENSMUSG00000025935
BP	GO:0097300	programmed necrotic cell death	9|1102	37|14957	0.00117017	0.0167472	ENSMUSG00000012519/ENSMUSG00000057963/ENSMUSG00000024778/ENSMUSG00000032000/ENSMUSG00000071369/ENSMUSG00000060733/ENSMUSG00000002661/ENSMUSG00000031639/ENSMUSG00000025888	Mlkl/Itpk1/Fas/Birc3/Map3k5/Ipmk/Alkbh7/Tlr3/Casp1	9	8	ENSMUSG00000012519/ENSMUSG00000057963/ENSMUSG00000024778/ENSMUSG00000032000/ENSMUSG00000060733/ENSMUSG00000002661/ENSMUSG00000031639/ENSMUSG00000025888	1	ENSMUSG00000071369
BP	GO:0006096	glycolytic process	14|1102	76|14957	0.00117777	0.0168087	ENSMUSG00000017390/ENSMUSG00000028671/ENSMUSG00000000628/ENSMUSG00000036067/ENSMUSG00000032294/ENSMUSG00000020053/ENSMUSG00000025877/ENSMUSG00000023019/ENSMUSG00000041237/ENSMUSG00000025236/ENSMUSG00000004040/ENSMUSG00000037012/ENSMUSG00000021196/ENSMUSG00000041798	Aldoc/Gale/Hk2/Slc2a6/Pkm/Igf1/Hk3/Gpd1/Pklr/Adpgk/Stat3/Hk1/Pfkp/Gck	14	9	ENSMUSG00000017390/ENSMUSG00000028671/ENSMUSG00000000628/ENSMUSG00000036067/ENSMUSG00000032294/ENSMUSG00000025877/ENSMUSG00000004040/ENSMUSG00000037012/ENSMUSG00000021196	5	ENSMUSG00000020053/ENSMUSG00000023019/ENSMUSG00000041237/ENSMUSG00000025236/ENSMUSG00000041798
BP	GO:0043434	response to peptide hormone	36|1102	287|14957	0.00118319	0.0168389	ENSMUSG00000058207/ENSMUSG00000013629/ENSMUSG00000021948/ENSMUSG00000039217/ENSMUSG00000038037/ENSMUSG00000041567/ENSMUSG00000044254/ENSMUSG00000026641/ENSMUSG00000026104/ENSMUSG00000040033/ENSMUSG00000041481/ENSMUSG00000004043/ENSMUSG00000066363/ENSMUSG00000030774/ENSMUSG00000027199/ENSMUSG00000018899/ENSMUSG00000024789/ENSMUSG00000024942/ENSMUSG00000066361/ENSMUSG00000024990/ENSMUSG00000032294/…	Serpina3k/Cad/Prkcd/Il18/Socs1/Serpina12/Pcsk9/Usf1/Stat1/Stat2/Serpina3g/Stat5a/Serpina3f/Pak1/Gatm/Irf1/Jak2/Capn1/Serpina3c/Rbp4/Pkm/Serpina3i/Zfp106/Igf1/Eprs/Gpld1/Braf/Gnai2/Pklr/Cacybp/Nfkb1/Rangap1/Stat3/Bglap3/Gck/Ahsg	36	21	ENSMUSG00000021948/ENSMUSG00000039217/ENSMUSG00000038037/ENSMUSG00000044254/ENSMUSG00000026641/ENSMUSG00000026104/ENSMUSG00000040033/ENSMUSG00000041481/ENSMUSG00000004043/ENSMUSG00000066363/ENSMUSG00000030774/ENSMUSG00000027199/ENSMUSG00000018899/ENSMUSG00000024789/ENSMUSG00000024942/ENSMUSG00000032294/ENSMUSG00000079014/ENSMUSG00000032562/ENSMUSG00000014226/ENSMUSG00000028163/ENSMUSG00000004040	15	ENSMUSG00000058207/ENSMUSG00000013629/ENSMUSG00000041567/ENSMUSG00000066361/ENSMUSG00000024990/ENSMUSG00000027288/ENSMUSG00000020053/ENSMUSG00000026615/ENSMUSG00000021340/ENSMUSG00000002413/ENSMUSG00000041237/ENSMUSG00000022391/ENSMUSG00000074489/ENSMUSG00000041798/ENSMUSG00000022868
BP	GO:0062012	regulation of small molecule metabolic process	40|1102	329|14957	0.00119392	0.0169443	ENSMUSG00000027533/ENSMUSG00000026385/ENSMUSG00000036585/ENSMUSG00000055782/ENSMUSG00000045294/ENSMUSG00000003226/ENSMUSG00000020826/ENSMUSG00000032080/ENSMUSG00000032193/ENSMUSG00000025271/ENSMUSG00000008035/ENSMUSG00000032349/ENSMUSG00000023982/ENSMUSG00000041567/ENSMUSG00000031594/ENSMUSG00000024556/ENSMUSG00000010175/ENSMUSG00000042010/ENSMUSG00000031378/ENSMUSG00000036067/ENSMUSG00000028603/…	Fabp5/Dbi/Fgf1/Abcd2/Insig1/Ranbp2/Nos2/Apoa4/Ldlr/Pfkfb1/Mid1ip1/Elovl5/Guca1a/Serpina12/Fgl1/Me2/Prox1/Acacb/Abcd1/Slc2a6/Scp2/mt-Co2/Pdk3/Ccnb1/Igf1/Igfbp4/Gpd1/Plek/Gpld1/Mup1/Plin5/Nfkb1/Stat3/Ddb1/Apoa5/Igfbp3/Atpif1/Ncor2/Gck/Phlda2	40	21	ENSMUSG00000026385/ENSMUSG00000055782/ENSMUSG00000045294/ENSMUSG00000020826/ENSMUSG00000032193/ENSMUSG00000008035/ENSMUSG00000032349/ENSMUSG00000023982/ENSMUSG00000031594/ENSMUSG00000024556/ENSMUSG00000042010/ENSMUSG00000031378/ENSMUSG00000036067/ENSMUSG00000064354/ENSMUSG00000035232/ENSMUSG00000041431/ENSMUSG00000020120/ENSMUSG00000028163/ENSMUSG00000004040/ENSMUSG00000054428/ENSMUSG00000010760	19	ENSMUSG00000027533/ENSMUSG00000036585/ENSMUSG00000003226/ENSMUSG00000032080/ENSMUSG00000025271/ENSMUSG00000041567/ENSMUSG00000010175/ENSMUSG00000028603/ENSMUSG00000020053/ENSMUSG00000017493/ENSMUSG00000023019/ENSMUSG00000021340/ENSMUSG00000078683/ENSMUSG00000011305/ENSMUSG00000024740/ENSMUSG00000032079/ENSMUSG00000020427/ENSMUSG00000029478/ENSMUSG00000041798
BP	GO:0045765	regulation of angiogenesis	35|1102	277|14957	0.00120954	0.0170328	ENSMUSG00000030789/ENSMUSG00000022425/ENSMUSG00000070368/ENSMUSG00000036585/ENSMUSG00000022181/ENSMUSG00000036986/ENSMUSG00000028039/ENSMUSG00000049103/ENSMUSG00000018593/ENSMUSG00000028064/ENSMUSG00000064246/ENSMUSG00000026104/ENSMUSG00000038387/ENSMUSG00000035385/ENSMUSG00000000628/ENSMUSG00000030341/ENSMUSG00000004951/ENSMUSG00000032294/ENSMUSG00000027230/ENSMUSG00000034855/ENSMUSG00000000290/…	Itgax/Enpp2/Prok1/Fgf1/C6/Pml/Efna3/Ccr2/Sparc/Sema4a/Chil1/Stat1/Rras/Ccl2/Hk2/Tnfrsf1a/Hspb1/Pkm/Creb3l1/Cxcl10/Itgb2/Emilin1/Tlr3/Angptl3/Lgals3/E2f2/Spred1/Wars/Stat3/Ccl5/Card10/Erap1/Ecscr/Btg1/Mydgf	35	29	ENSMUSG00000030789/ENSMUSG00000036986/ENSMUSG00000028039/ENSMUSG00000049103/ENSMUSG00000018593/ENSMUSG00000028064/ENSMUSG00000064246/ENSMUSG00000026104/ENSMUSG00000038387/ENSMUSG00000035385/ENSMUSG00000000628/ENSMUSG00000030341/ENSMUSG00000004951/ENSMUSG00000032294/ENSMUSG00000027230/ENSMUSG00000034855/ENSMUSG00000000290/ENSMUSG00000029163/ENSMUSG00000031639/ENSMUSG00000050335/ENSMUSG00000018983/…	6	ENSMUSG00000022425/ENSMUSG00000070368/ENSMUSG00000036585/ENSMUSG00000022181/ENSMUSG00000028553/ENSMUSG00000019579
BP	GO:0007259	JAK-STAT cascade	18|1102	111|14957	0.00121018	0.0170328	ENSMUSG00000030895/ENSMUSG00000034422/ENSMUSG00000039217/ENSMUSG00000038037/ENSMUSG00000026104/ENSMUSG00000040033/ENSMUSG00000004043/ENSMUSG00000022831/ENSMUSG00000018899/ENSMUSG00000053175/ENSMUSG00000024789/ENSMUSG00000030341/ENSMUSG00000031805/ENSMUSG00000020053/ENSMUSG00000004040/ENSMUSG00000035042/ENSMUSG00000034292/ENSMUSG00000042105	Hpx/Parp14/Il18/Socs1/Stat1/Stat2/Stat5a/Hcls1/Irf1/Bcl3/Jak2/Tnfrsf1a/Jak3/Igf1/Stat3/Ccl5/Traf3ip1/Inpp5f	18	15	ENSMUSG00000030895/ENSMUSG00000034422/ENSMUSG00000039217/ENSMUSG00000038037/ENSMUSG00000026104/ENSMUSG00000040033/ENSMUSG00000004043/ENSMUSG00000022831/ENSMUSG00000018899/ENSMUSG00000053175/ENSMUSG00000024789/ENSMUSG00000030341/ENSMUSG00000031805/ENSMUSG00000004040/ENSMUSG00000035042	3	ENSMUSG00000020053/ENSMUSG00000034292/ENSMUSG00000042105
BP	GO:0016064	immunoglobulin mediated immune response	18|1102	111|14957	0.00121018	0.0170328	ENSMUSG00000029656/ENSMUSG00000025498/ENSMUSG00000030895/ENSMUSG00000001750/ENSMUSG00000022149/ENSMUSG00000021948/ENSMUSG00000023249/ENSMUSG00000026542/ENSMUSG00000015947/ENSMUSG00000053175/ENSMUSG00000041471/ENSMUSG00000035031/ENSMUSG00000028191/ENSMUSG00000000732/ENSMUSG00000032508/ENSMUSG00000058715/ENSMUSG00000055994/ENSMUSG00000037649	C8b/Irf7/Hpx/Tcirg1/C9/Prkcd/Parp3/Apcs/Fcgr1/Bcl3/Shld2/C8a/Bcl10/Icosl/Myd88/Fcer1g/Nod2/H2-DMa	18	14	ENSMUSG00000025498/ENSMUSG00000030895/ENSMUSG00000001750/ENSMUSG00000021948/ENSMUSG00000023249/ENSMUSG00000026542/ENSMUSG00000015947/ENSMUSG00000053175/ENSMUSG00000028191/ENSMUSG00000000732/ENSMUSG00000032508/ENSMUSG00000058715/ENSMUSG00000055994/ENSMUSG00000037649	4	ENSMUSG00000029656/ENSMUSG00000022149/ENSMUSG00000041471/ENSMUSG00000035031
BP	GO:0002286	T cell activation involved in immune response	15|1102	85|14957	0.00126159	0.0177074	ENSMUSG00000049103/ENSMUSG00000037405/ENSMUSG00000039217/ENSMUSG00000028064/ENSMUSG00000002983/ENSMUSG00000018899/ENSMUSG00000051457/ENSMUSG00000053175/ENSMUSG00000031805/ENSMUSG00000050335/ENSMUSG00000058715/ENSMUSG00000004040/ENSMUSG00000021998/ENSMUSG00000044701/ENSMUSG00000032688	Ccr2/Icam1/Il18/Sema4a/Relb/Irf1/Spn/Bcl3/Jak3/Lgals3/Fcer1g/Stat3/Lcp1/Il27/Malt1	15	15	ENSMUSG00000049103/ENSMUSG00000037405/ENSMUSG00000039217/ENSMUSG00000028064/ENSMUSG00000002983/ENSMUSG00000018899/ENSMUSG00000051457/ENSMUSG00000053175/ENSMUSG00000031805/ENSMUSG00000050335/ENSMUSG00000058715/ENSMUSG00000004040/ENSMUSG00000021998/ENSMUSG00000044701/ENSMUSG00000032688	0
BP	GO:2001233	regulation of apoptotic signaling pathway	45|1102	384|14957	0.00131137	0.0182796	ENSMUSG00000002083/ENSMUSG00000040093/ENSMUSG00000036986/ENSMUSG00000030560/ENSMUSG00000021948/ENSMUSG00000032350/ENSMUSG00000057789/ENSMUSG00000037405/ENSMUSG00000026875/ENSMUSG00000025130/ENSMUSG00000041324/ENSMUSG00000024778/ENSMUSG00000024789/ENSMUSG00000056071/ENSMUSG00000004951/ENSMUSG00000027230/ENSMUSG00000031805/ENSMUSG00000022564/ENSMUSG00000032115/ENSMUSG00000054717/ENSMUSG00000040329/…	Bbc3/Bmf/Pml/Ctsc/Prkcd/Gclc/Bak1/Icam1/Traf1/P4hb/Inhba/Fas/Jak2/S100a9/Hspb1/Creb3l1/Jak3/Grina/Hyou1/Hmgb2/Il7/Syvn1/Bcl2a1a/Wfs1/Bcl10/Igf1/Fam162a/Dedd2/Bub1/Gnai2/Lgals3/Plscr1/Tnfsf10/Rack1/Trim39/Mcl1/Deptor/Pycard/Adora2a/Cep63/Atf3/Ivns1abp/Tnfaip3/Atpif1/Prkra	45	34	ENSMUSG00000002083/ENSMUSG00000040093/ENSMUSG00000036986/ENSMUSG00000030560/ENSMUSG00000021948/ENSMUSG00000032350/ENSMUSG00000057789/ENSMUSG00000037405/ENSMUSG00000026875/ENSMUSG00000024778/ENSMUSG00000024789/ENSMUSG00000056071/ENSMUSG00000004951/ENSMUSG00000027230/ENSMUSG00000031805/ENSMUSG00000022564/ENSMUSG00000054717/ENSMUSG00000040329/ENSMUSG00000102037/ENSMUSG00000028191/ENSMUSG00000003955/…	11	ENSMUSG00000025130/ENSMUSG00000041324/ENSMUSG00000032115/ENSMUSG00000024807/ENSMUSG00000039474/ENSMUSG00000020053/ENSMUSG00000020372/ENSMUSG00000045409/ENSMUSG00000022419/ENSMUSG00000032534/ENSMUSG00000023150
BP	GO:0019835	cytolysis	7|1102	24|14957	0.00131312	0.0182796	ENSMUSG00000029656/ENSMUSG00000022149/ENSMUSG00000016024/ENSMUSG00000022575/ENSMUSG00000035031/ENSMUSG00000021340/ENSMUSG00000027249	C8b/C9/Lbp/Gsdmd/C8a/Gpld1/F2	7	2	ENSMUSG00000016024/ENSMUSG00000022575	5	ENSMUSG00000029656/ENSMUSG00000022149/ENSMUSG00000035031/ENSMUSG00000021340/ENSMUSG00000027249
BP	GO:0065005	protein-lipid complex assembly	7|1102	24|14957	0.00131312	0.0182796	ENSMUSG00000032080/ENSMUSG00000032883/ENSMUSG00000057074/ENSMUSG00000032083/ENSMUSG00000015243/ENSMUSG00000028158/ENSMUSG00000032079	Apoa4/Acsl3/Ces1g/Apoa1/Abca1/Mttp/Apoa5	7	2	ENSMUSG00000032883/ENSMUSG00000057074	5	ENSMUSG00000032080/ENSMUSG00000032083/ENSMUSG00000015243/ENSMUSG00000028158/ENSMUSG00000032079
BP	GO:0006633	fatty acid biosynthetic process	19|1102	121|14957	0.00133172	0.0184881	ENSMUSG00000027533/ENSMUSG00000055782/ENSMUSG00000045294/ENSMUSG00000032080/ENSMUSG00000008035/ENSMUSG00000032349/ENSMUSG00000020917/ENSMUSG00000032883/ENSMUSG00000025203/ENSMUSG00000037071/ENSMUSG00000042010/ENSMUSG00000024664/ENSMUSG00000031378/ENSMUSG00000027605/ENSMUSG00000031708/ENSMUSG00000044788/ENSMUSG00000032079/ENSMUSG00000030935/ENSMUSG00000021620	Fabp5/Abcd2/Insig1/Apoa4/Mid1ip1/Elovl5/Acly/Acsl3/Scd2/Scd1/Acacb/Fads3/Abcd1/Acss2/Tecr/Fads6/Apoa5/Acsm3/Acot12	19	13	ENSMUSG00000055782/ENSMUSG00000045294/ENSMUSG00000008035/ENSMUSG00000032349/ENSMUSG00000020917/ENSMUSG00000032883/ENSMUSG00000025203/ENSMUSG00000037071/ENSMUSG00000042010/ENSMUSG00000024664/ENSMUSG00000031378/ENSMUSG00000027605/ENSMUSG00000031708	6	ENSMUSG00000027533/ENSMUSG00000032080/ENSMUSG00000044788/ENSMUSG00000032079/ENSMUSG00000030935/ENSMUSG00000021620
BP	GO:0008654	phospholipid biosynthetic process	22|1102	149|14957	0.00133637	0.0185011	ENSMUSG00000027533/ENSMUSG00000032883/ENSMUSG00000032083/ENSMUSG00000052270/ENSMUSG00000027952/ENSMUSG00000019139/ENSMUSG00000041939/ENSMUSG00000032540/ENSMUSG00000050931/ENSMUSG00000030759/ENSMUSG00000027875/ENSMUSG00000048486/ENSMUSG00000034330/ENSMUSG00000032369/ENSMUSG00000058258/ENSMUSG00000093930/ENSMUSG00000029314/ENSMUSG00000060675/ENSMUSG00000020669/ENSMUSG00000058793/ENSMUSG00000025950/…	Fabp5/Acsl3/Apoa1/Fpr2/Pmvk/Isyna1/Mvk/Abhd5/Sgms2/Far1/Hmgcs2/Fitm2/Plcg2/Plscr1/Idi1/Hmgcs1/Gpat3/Pla2g16/Sh3yl1/Cds2/Idh1/Dhdds	22	16	ENSMUSG00000032883/ENSMUSG00000052270/ENSMUSG00000027952/ENSMUSG00000019139/ENSMUSG00000041939/ENSMUSG00000050931/ENSMUSG00000030759/ENSMUSG00000034330/ENSMUSG00000032369/ENSMUSG00000058258/ENSMUSG00000093930/ENSMUSG00000029314/ENSMUSG00000060675/ENSMUSG00000020669/ENSMUSG00000058793/ENSMUSG00000025950	6	ENSMUSG00000027533/ENSMUSG00000032083/ENSMUSG00000032540/ENSMUSG00000027875/ENSMUSG00000048486/ENSMUSG00000012117
BP	GO:0006757	ATP generation from ADP	14|1102	77|14957	0.00134389	0.0185011	ENSMUSG00000017390/ENSMUSG00000028671/ENSMUSG00000000628/ENSMUSG00000036067/ENSMUSG00000032294/ENSMUSG00000020053/ENSMUSG00000025877/ENSMUSG00000023019/ENSMUSG00000041237/ENSMUSG00000025236/ENSMUSG00000004040/ENSMUSG00000037012/ENSMUSG00000021196/ENSMUSG00000041798	Aldoc/Gale/Hk2/Slc2a6/Pkm/Igf1/Hk3/Gpd1/Pklr/Adpgk/Stat3/Hk1/Pfkp/Gck	14	9	ENSMUSG00000017390/ENSMUSG00000028671/ENSMUSG00000000628/ENSMUSG00000036067/ENSMUSG00000032294/ENSMUSG00000025877/ENSMUSG00000004040/ENSMUSG00000037012/ENSMUSG00000021196	5	ENSMUSG00000020053/ENSMUSG00000023019/ENSMUSG00000041237/ENSMUSG00000025236/ENSMUSG00000041798
BP	GO:0015748	organophosphate ester transport	14|1102	77|14957	0.00134389	0.0185011	ENSMUSG00000074345/ENSMUSG00000017754/ENSMUSG00000021948/ENSMUSG00000032080/ENSMUSG00000032193/ENSMUSG00000024851/ENSMUSG00000032083/ENSMUSG00000023088/ENSMUSG00000015243/ENSMUSG00000028603/ENSMUSG00000032114/ENSMUSG00000027546/ENSMUSG00000028158/ENSMUSG00000032079	Tnfaip8l3/Pltp/Prkcd/Apoa4/Ldlr/Pitpnm1/Apoa1/Abcc1/Abca1/Scp2/Slc37a4/Atp9a/Mttp/Apoa5	14	5	ENSMUSG00000074345/ENSMUSG00000021948/ENSMUSG00000032193/ENSMUSG00000024851/ENSMUSG00000023088	9	ENSMUSG00000017754/ENSMUSG00000032080/ENSMUSG00000032083/ENSMUSG00000015243/ENSMUSG00000028603/ENSMUSG00000032114/ENSMUSG00000027546/ENSMUSG00000028158/ENSMUSG00000032079
BP	GO:0007252	I-kappaB phosphorylation	6|1102	18|14957	0.00135424	0.0185011	ENSMUSG00000040026/ENSMUSG00000027995/ENSMUSG00000037902/ENSMUSG00000031639/ENSMUSG00000028431/ENSMUSG00000044583	Saa3/Tlr2/Sirpa/Tlr3/Ikbkap/Tlr7	6	4	ENSMUSG00000040026/ENSMUSG00000027995/ENSMUSG00000037902/ENSMUSG00000031639	2	ENSMUSG00000028431/ENSMUSG00000044583
BP	GO:0015721	bile acid and bile salt transport	6|1102	18|14957	0.00135424	0.0185011	ENSMUSG00000079263/ENSMUSG00000023073/ENSMUSG00000021135/ENSMUSG00000030762/ENSMUSG00000020865/ENSMUSG00000030236	Gm6614/Slc10a2/Slc10a1/Aqp8/Abcc3/Slco1b2	6	3	ENSMUSG00000023073/ENSMUSG00000030762/ENSMUSG00000020865	3	ENSMUSG00000079263/ENSMUSG00000021135/ENSMUSG00000030236
BP	GO:0006006	glucose metabolic process	25|1102	178|14957	0.00135445	0.0185011	ENSMUSG00000027533/ENSMUSG00000027808/ENSMUSG00000003226/ENSMUSG00000025271/ENSMUSG00000041567/ENSMUSG00000031594/ENSMUSG00000026641/ENSMUSG00000000628/ENSMUSG00000042010/ENSMUSG00000024990/ENSMUSG00000032294/ENSMUSG00000035232/ENSMUSG00000020053/ENSMUSG00000017493/ENSMUSG00000023019/ENSMUSG00000021340/ENSMUSG00000078683/ENSMUSG00000025236/ENSMUSG00000037012/ENSMUSG00000024740/ENSMUSG00000021196/…	Fabp5/Serp1/Ranbp2/Pfkfb1/Serpina12/Fgl1/Usf1/Hk2/Acacb/Rbp4/Pkm/Pdk3/Igf1/Igfbp4/Gpd1/Gpld1/Mup1/Adpgk/Hk1/Ddb1/Pfkp/Atf3/Igfbp3/Gck/Phlda2	25	10	ENSMUSG00000031594/ENSMUSG00000026641/ENSMUSG00000000628/ENSMUSG00000042010/ENSMUSG00000032294/ENSMUSG00000035232/ENSMUSG00000037012/ENSMUSG00000021196/ENSMUSG00000026628/ENSMUSG00000010760	15	ENSMUSG00000027533/ENSMUSG00000027808/ENSMUSG00000003226/ENSMUSG00000025271/ENSMUSG00000041567/ENSMUSG00000024990/ENSMUSG00000020053/ENSMUSG00000017493/ENSMUSG00000023019/ENSMUSG00000021340/ENSMUSG00000078683/ENSMUSG00000025236/ENSMUSG00000024740/ENSMUSG00000020427/ENSMUSG00000041798
BP	GO:0032507	maintenance of protein location in cell	13|1102	69|14957	0.00140684	0.0191654	ENSMUSG00000045294/ENSMUSG00000036986/ENSMUSG00000079523/ENSMUSG00000049775/ENSMUSG00000079111/ENSMUSG00000000628/ENSMUSG00000046230/ENSMUSG00000036817/ENSMUSG00000024044/ENSMUSG00000022391/ENSMUSG00000037012/ENSMUSG00000028367/ENSMUSG00000003378	Insig1/Pml/Tmsb10/Tmsb4x/Kdelr2/Hk2/Vps13a/Sun1/Epb41l3/Rangap1/Hk1/Txn1/Grik5	13	9	ENSMUSG00000045294/ENSMUSG00000036986/ENSMUSG00000079523/ENSMUSG00000049775/ENSMUSG00000000628/ENSMUSG00000036817/ENSMUSG00000024044/ENSMUSG00000037012/ENSMUSG00000028367	4	ENSMUSG00000079111/ENSMUSG00000046230/ENSMUSG00000022391/ENSMUSG00000003378
BP	GO:0045582	positive regulation of T cell differentiation	15|1102	86|14957	0.00142626	0.0193466	ENSMUSG00000049103/ENSMUSG00000039217/ENSMUSG00000038037/ENSMUSG00000039384/ENSMUSG00000004043/ENSMUSG00000018899/ENSMUSG00000115338/ENSMUSG00000028076/ENSMUSG00000040329/ENSMUSG00000031101/ENSMUSG00000027347/ENSMUSG00000001123/ENSMUSG00000021270/ENSMUSG00000037649/ENSMUSG00000032688	Ccr2/Il18/Socs1/Dusp10/Stat5a/Irf1/Pnp/Cd1d1/Il7/Sash3/Rasgrp1/Lgals9/Hsp90aa1/H2-DMa/Malt1	15	15	ENSMUSG00000049103/ENSMUSG00000039217/ENSMUSG00000038037/ENSMUSG00000039384/ENSMUSG00000004043/ENSMUSG00000018899/ENSMUSG00000115338/ENSMUSG00000028076/ENSMUSG00000040329/ENSMUSG00000031101/ENSMUSG00000027347/ENSMUSG00000001123/ENSMUSG00000021270/ENSMUSG00000037649/ENSMUSG00000032688	0
BP	GO:0032814	regulation of natural killer cell activation	9|1102	38|14957	0.00143458	0.0193466	ENSMUSG00000039217/ENSMUSG00000004043/ENSMUSG00000018899/ENSMUSG00000031451/ENSMUSG00000027347/ENSMUSG00000047123/ENSMUSG00000001123/ENSMUSG00000079685/ENSMUSG00000025188	Il18/Stat5a/Irf1/Gas6/Rasgrp1/Ticam1/Lgals9/Ulbp1/Hps1	9	8	ENSMUSG00000039217/ENSMUSG00000004043/ENSMUSG00000018899/ENSMUSG00000031451/ENSMUSG00000027347/ENSMUSG00000001123/ENSMUSG00000079685/ENSMUSG00000025188	1	ENSMUSG00000047123
BP	GO:0072595	maintenance of protein localization in organelle	9|1102	38|14957	0.00143458	0.0193466	ENSMUSG00000045294/ENSMUSG00000036986/ENSMUSG00000079111/ENSMUSG00000000628/ENSMUSG00000036817/ENSMUSG00000022391/ENSMUSG00000037012/ENSMUSG00000028367/ENSMUSG00000003378	Insig1/Pml/Kdelr2/Hk2/Sun1/Rangap1/Hk1/Txn1/Grik5	9	6	ENSMUSG00000045294/ENSMUSG00000036986/ENSMUSG00000000628/ENSMUSG00000036817/ENSMUSG00000037012/ENSMUSG00000028367	3	ENSMUSG00000079111/ENSMUSG00000022391/ENSMUSG00000003378
BP	GO:0050792	regulation of viral process	24|1102	169|14957	0.00143533	0.0193466	ENSMUSG00000020914/ENSMUSG00000046718/ENSMUSG00000068220/ENSMUSG00000025492/ENSMUSG00000036986/ENSMUSG00000052776/ENSMUSG00000026542/ENSMUSG00000032231/ENSMUSG00000025130/ENSMUSG00000009585/ENSMUSG00000026104/ENSMUSG00000029561/ENSMUSG00000010175/ENSMUSG00000035692/ENSMUSG00000060591/ENSMUSG00000029826/ENSMUSG00000032383/ENSMUSG00000063268/ENSMUSG00000032369/ENSMUSG00000035042/ENSMUSG00000032661/…	Top2a/Bst2/Lgals1/Ifitm3/Pml/Oas1a/Apcs/Anxa2/P4hb/Apobec3/Stat1/Oasl2/Prox1/Isg15/Ifitm2/Zc3hav1/Ppib/Parp10/Plscr1/Ccl5/Oas3/Pabpc1/Ddb1/Chmp4b	24	19	ENSMUSG00000020914/ENSMUSG00000046718/ENSMUSG00000068220/ENSMUSG00000025492/ENSMUSG00000036986/ENSMUSG00000052776/ENSMUSG00000026542/ENSMUSG00000032231/ENSMUSG00000009585/ENSMUSG00000026104/ENSMUSG00000029561/ENSMUSG00000035692/ENSMUSG00000060591/ENSMUSG00000029826/ENSMUSG00000063268/ENSMUSG00000032369/ENSMUSG00000035042/ENSMUSG00000032661/ENSMUSG00000038467	5	ENSMUSG00000025130/ENSMUSG00000010175/ENSMUSG00000032383/ENSMUSG00000022283/ENSMUSG00000024740
BP	GO:0002698	negative regulation of immune effector process	19|1102	122|14957	0.00147105	0.0197757	ENSMUSG00000049103/ENSMUSG00000023249/ENSMUSG00000039384/ENSMUSG00000032083/ENSMUSG00000018899/ENSMUSG00000051457/ENSMUSG00000037321/ENSMUSG00000045827/ENSMUSG00000030157/ENSMUSG00000017830/ENSMUSG00000031805/ENSMUSG00000053318/ENSMUSG00000055447/ENSMUSG00000050335/ENSMUSG00000055994/ENSMUSG00000044206/ENSMUSG00000034292/ENSMUSG00000001123/ENSMUSG00000019850	Ccr2/Parp3/Dusp10/Apoa1/Irf1/Spn/Tap1/Serpinb9/Clec2d/Dhx58/Jak3/Slamf8/Cd47/Lgals3/Nod2/Vsig4/Traf3ip1/Lgals9/Tnfaip3	19	16	ENSMUSG00000049103/ENSMUSG00000023249/ENSMUSG00000039384/ENSMUSG00000018899/ENSMUSG00000051457/ENSMUSG00000037321/ENSMUSG00000045827/ENSMUSG00000030157/ENSMUSG00000017830/ENSMUSG00000031805/ENSMUSG00000053318/ENSMUSG00000055447/ENSMUSG00000050335/ENSMUSG00000055994/ENSMUSG00000001123/ENSMUSG00000019850	3	ENSMUSG00000032083/ENSMUSG00000044206/ENSMUSG00000034292
BP	GO:0001909	leukocyte mediated cytotoxicity	18|1102	113|14957	0.00149217	0.0200069	ENSMUSG00000067235/ENSMUSG00000030560/ENSMUSG00000039217/ENSMUSG00000015947/ENSMUSG00000004043/ENSMUSG00000037321/ENSMUSG00000035385/ENSMUSG00000115338/ENSMUSG00000045827/ENSMUSG00000030157/ENSMUSG00000028793/ENSMUSG00000028076/ENSMUSG00000027347/ENSMUSG00000030707/ENSMUSG00000001123/ENSMUSG00000079685/ENSMUSG00000029254/ENSMUSG00000027249	H2-Q10/Ctsc/Il18/Fcgr1/Stat5a/Tap1/Ccl2/Pnp/Serpinb9/Clec2d/Rnf19b/Cd1d1/Rasgrp1/Coro1a/Lgals9/Ulbp1/Stap1/F2	18	16	ENSMUSG00000067235/ENSMUSG00000030560/ENSMUSG00000039217/ENSMUSG00000015947/ENSMUSG00000004043/ENSMUSG00000037321/ENSMUSG00000035385/ENSMUSG00000115338/ENSMUSG00000045827/ENSMUSG00000030157/ENSMUSG00000028793/ENSMUSG00000028076/ENSMUSG00000027347/ENSMUSG00000030707/ENSMUSG00000001123/ENSMUSG00000079685	2	ENSMUSG00000029254/ENSMUSG00000027249
BP	GO:0009142	nucleoside triphosphate biosynthetic process	21|1102	141|14957	0.00152263	0.0203083	ENSMUSG00000013629/ENSMUSG00000017390/ENSMUSG00000020638/ENSMUSG00000032478/ENSMUSG00000028671/ENSMUSG00000115338/ENSMUSG00000000628/ENSMUSG00000036067/ENSMUSG00000064354/ENSMUSG00000032294/ENSMUSG00000020053/ENSMUSG00000025877/ENSMUSG00000023019/ENSMUSG00000041237/ENSMUSG00000041323/ENSMUSG00000025236/ENSMUSG00000004040/ENSMUSG00000037012/ENSMUSG00000021196/ENSMUSG00000031360/ENSMUSG00000041798	Cad/Aldoc/Cmpk2/Nme6/Gale/Pnp/Hk2/Slc2a6/mt-Co2/Pkm/Igf1/Hk3/Gpd1/Pklr/Ak7/Adpgk/Stat3/Hk1/Pfkp/Ctps2/Gck	21	14	ENSMUSG00000017390/ENSMUSG00000020638/ENSMUSG00000028671/ENSMUSG00000115338/ENSMUSG00000000628/ENSMUSG00000036067/ENSMUSG00000064354/ENSMUSG00000032294/ENSMUSG00000025877/ENSMUSG00000041323/ENSMUSG00000004040/ENSMUSG00000037012/ENSMUSG00000021196/ENSMUSG00000031360	7	ENSMUSG00000013629/ENSMUSG00000032478/ENSMUSG00000020053/ENSMUSG00000023019/ENSMUSG00000041237/ENSMUSG00000025236/ENSMUSG00000041798
BP	GO:0062013	positive regulation of small molecule metabolic process	21|1102	141|14957	0.00152263	0.0203083	ENSMUSG00000036585/ENSMUSG00000055782/ENSMUSG00000020826/ENSMUSG00000032080/ENSMUSG00000008035/ENSMUSG00000032349/ENSMUSG00000023982/ENSMUSG00000031378/ENSMUSG00000028603/ENSMUSG00000064354/ENSMUSG00000041431/ENSMUSG00000020053/ENSMUSG00000023019/ENSMUSG00000021340/ENSMUSG00000078683/ENSMUSG00000011305/ENSMUSG00000028163/ENSMUSG00000004040/ENSMUSG00000024740/ENSMUSG00000032079/ENSMUSG00000041798	Fgf1/Abcd2/Nos2/Apoa4/Mid1ip1/Elovl5/Guca1a/Abcd1/Scp2/mt-Co2/Ccnb1/Igf1/Gpd1/Gpld1/Mup1/Plin5/Nfkb1/Stat3/Ddb1/Apoa5/Gck	21	10	ENSMUSG00000055782/ENSMUSG00000020826/ENSMUSG00000008035/ENSMUSG00000032349/ENSMUSG00000023982/ENSMUSG00000031378/ENSMUSG00000064354/ENSMUSG00000041431/ENSMUSG00000028163/ENSMUSG00000004040	11	ENSMUSG00000036585/ENSMUSG00000032080/ENSMUSG00000028603/ENSMUSG00000020053/ENSMUSG00000023019/ENSMUSG00000021340/ENSMUSG00000078683/ENSMUSG00000011305/ENSMUSG00000024740/ENSMUSG00000032079/ENSMUSG00000041798
BP	GO:0050920	regulation of chemotaxis	26|1102	190|14957	0.00160677	0.0213747	ENSMUSG00000036585/ENSMUSG00000049103/ENSMUSG00000028064/ENSMUSG00000016024/ENSMUSG00000021451/ENSMUSG00000037362/ENSMUSG00000025314/ENSMUSG00000035385/ENSMUSG00000052270/ENSMUSG00000031451/ENSMUSG00000004951/ENSMUSG00000034855/ENSMUSG00000050350/ENSMUSG00000053318/ENSMUSG00000023913/ENSMUSG00000024397/ENSMUSG00000033220/ENSMUSG00000055994/ENSMUSG00000035042/ENSMUSG00000031948/ENSMUSG00000025804/…	Fgf1/Ccr2/Sema4a/Lbp/Sema4d/Nov/Ptprj/Ccl2/Fpr2/Gas6/Hspb1/Cxcl10/Gpr18/Slamf8/Pla2g7/Aif1/Rac2/Nod2/Ccl5/Kars/Ccr1/Bst1/Slit1/Stap1/Camk1d/Slc8b1	26	22	ENSMUSG00000049103/ENSMUSG00000028064/ENSMUSG00000016024/ENSMUSG00000021451/ENSMUSG00000037362/ENSMUSG00000025314/ENSMUSG00000035385/ENSMUSG00000052270/ENSMUSG00000031451/ENSMUSG00000004951/ENSMUSG00000034855/ENSMUSG00000050350/ENSMUSG00000053318/ENSMUSG00000024397/ENSMUSG00000033220/ENSMUSG00000055994/ENSMUSG00000035042/ENSMUSG00000031948/ENSMUSG00000025804/ENSMUSG00000029082/ENSMUSG00000039145/…	4	ENSMUSG00000036585/ENSMUSG00000023913/ENSMUSG00000025020/ENSMUSG00000029254
BP	GO:0006164	purine nucleotide biosynthetic process	28|1102	210|14957	0.00161681	0.0214522	ENSMUSG00000017390/ENSMUSG00000020826/ENSMUSG00000023982/ENSMUSG00000020917/ENSMUSG00000052776/ENSMUSG00000032478/ENSMUSG00000029561/ENSMUSG00000028671/ENSMUSG00000115338/ENSMUSG00000000628/ENSMUSG00000042010/ENSMUSG00000032047/ENSMUSG00000018796/ENSMUSG00000036067/ENSMUSG00000064354/ENSMUSG00000032294/ENSMUSG00000035232/ENSMUSG00000020053/ENSMUSG00000025877/ENSMUSG00000023019/ENSMUSG00000041237/…	Aldoc/Nos2/Guca1a/Acly/Oas1a/Nme6/Oasl2/Gale/Pnp/Hk2/Acacb/Acat1/Acsl1/Slc2a6/mt-Co2/Pkm/Pdk3/Igf1/Hk3/Gpd1/Pklr/Acss2/Adpgk/Stat3/Pank4/Hk1/Pfkp/Gck	28	19	ENSMUSG00000017390/ENSMUSG00000020826/ENSMUSG00000023982/ENSMUSG00000020917/ENSMUSG00000052776/ENSMUSG00000029561/ENSMUSG00000028671/ENSMUSG00000115338/ENSMUSG00000000628/ENSMUSG00000042010/ENSMUSG00000036067/ENSMUSG00000064354/ENSMUSG00000032294/ENSMUSG00000035232/ENSMUSG00000025877/ENSMUSG00000027605/ENSMUSG00000004040/ENSMUSG00000037012/ENSMUSG00000021196	9	ENSMUSG00000032478/ENSMUSG00000032047/ENSMUSG00000018796/ENSMUSG00000020053/ENSMUSG00000023019/ENSMUSG00000041237/ENSMUSG00000025236/ENSMUSG00000029056/ENSMUSG00000041798
BP	GO:0045807	positive regulation of endocytosis	23|1102	161|14957	0.00164791	0.0217042	ENSMUSG00000016024/ENSMUSG00000044254/ENSMUSG00000032231/ENSMUSG00000015947/ENSMUSG00000032083/ENSMUSG00000025314/ENSMUSG00000035385/ENSMUSG00000052270/ENSMUSG00000051439/ENSMUSG00000031451/ENSMUSG00000059714/ENSMUSG00000055447/ENSMUSG00000037902/ENSMUSG00000069539/ENSMUSG00000034330/ENSMUSG00000058715/ENSMUSG00000055994/ENSMUSG00000030793/ENSMUSG00000020143/ENSMUSG00000029254/ENSMUSG00000068227/…	Lbp/Pcsk9/Anxa2/Fcgr1/Apoa1/Ptprj/Ccl2/Fpr2/Cd14/Gas6/Flot1/Cd47/Sirpa/Scyl2/Plcg2/Fcer1g/Nod2/Pycard/Dock2/Stap1/Il2rb/Camk1d/Ahsg	23	19	ENSMUSG00000016024/ENSMUSG00000044254/ENSMUSG00000032231/ENSMUSG00000015947/ENSMUSG00000025314/ENSMUSG00000035385/ENSMUSG00000052270/ENSMUSG00000051439/ENSMUSG00000031451/ENSMUSG00000059714/ENSMUSG00000055447/ENSMUSG00000037902/ENSMUSG00000034330/ENSMUSG00000058715/ENSMUSG00000055994/ENSMUSG00000030793/ENSMUSG00000020143/ENSMUSG00000068227/ENSMUSG00000039145	4	ENSMUSG00000032083/ENSMUSG00000069539/ENSMUSG00000029254/ENSMUSG00000022868
BP	GO:1903426	regulation of reactive oxygen species biosynthetic process	16|1102	96|14957	0.00165147	0.0217042	ENSMUSG00000055782/ENSMUSG00000037405/ENSMUSG00000024789/ENSMUSG00000027995/ENSMUSG00000031378/ENSMUSG00000064354/ENSMUSG00000000290/ENSMUSG00000055447/ENSMUSG00000020053/ENSMUSG00000047123/ENSMUSG00000037902/ENSMUSG00000024397/ENSMUSG00000031266/ENSMUSG00000004040/ENSMUSG00000021270/ENSMUSG00000079685	Abcd2/Icam1/Jak2/Tlr2/Abcd1/mt-Co2/Itgb2/Cd47/Igf1/Ticam1/Sirpa/Aif1/Gla/Stat3/Hsp90aa1/Ulbp1	16	14	ENSMUSG00000055782/ENSMUSG00000037405/ENSMUSG00000024789/ENSMUSG00000027995/ENSMUSG00000031378/ENSMUSG00000064354/ENSMUSG00000000290/ENSMUSG00000055447/ENSMUSG00000037902/ENSMUSG00000024397/ENSMUSG00000031266/ENSMUSG00000004040/ENSMUSG00000021270/ENSMUSG00000079685	2	ENSMUSG00000020053/ENSMUSG00000047123
BP	GO:0015718	monocarboxylic acid transport	18|1102	114|14957	0.00165284	0.0217042	ENSMUSG00000079263/ENSMUSG00000023073/ENSMUSG00000020826/ENSMUSG00000032883/ENSMUSG00000023088/ENSMUSG00000030774/ENSMUSG00000021135/ENSMUSG00000031378/ENSMUSG00000030762/ENSMUSG00000018796/ENSMUSG00000024990/ENSMUSG00000025790/ENSMUSG00000026615/ENSMUSG00000032548/ENSMUSG00000020865/ENSMUSG00000027359/ENSMUSG00000030236/ENSMUSG00000025161	Gm6614/Slc10a2/Nos2/Acsl3/Abcc1/Pak1/Slc10a1/Abcd1/Aqp8/Acsl1/Rbp4/Slco3a1/Eprs/Slco2a1/Abcc3/Slc27a2/Slco1b2/Slc16a3	18	11	ENSMUSG00000023073/ENSMUSG00000020826/ENSMUSG00000032883/ENSMUSG00000023088/ENSMUSG00000030774/ENSMUSG00000031378/ENSMUSG00000030762/ENSMUSG00000025790/ENSMUSG00000032548/ENSMUSG00000020865/ENSMUSG00000025161	7	ENSMUSG00000079263/ENSMUSG00000021135/ENSMUSG00000018796/ENSMUSG00000024990/ENSMUSG00000026615/ENSMUSG00000027359/ENSMUSG00000030236
BP	GO:1903409	reactive oxygen species biosynthetic process	18|1102	114|14957	0.00165284	0.0217042	ENSMUSG00000055782/ENSMUSG00000020826/ENSMUSG00000037405/ENSMUSG00000068452/ENSMUSG00000024789/ENSMUSG00000027995/ENSMUSG00000031378/ENSMUSG00000064354/ENSMUSG00000000290/ENSMUSG00000055447/ENSMUSG00000020053/ENSMUSG00000047123/ENSMUSG00000037902/ENSMUSG00000024397/ENSMUSG00000031266/ENSMUSG00000004040/ENSMUSG00000021270/ENSMUSG00000079685	Abcd2/Nos2/Icam1/Duox2/Jak2/Tlr2/Abcd1/mt-Co2/Itgb2/Cd47/Igf1/Ticam1/Sirpa/Aif1/Gla/Stat3/Hsp90aa1/Ulbp1	18	16	ENSMUSG00000055782/ENSMUSG00000020826/ENSMUSG00000037405/ENSMUSG00000068452/ENSMUSG00000024789/ENSMUSG00000027995/ENSMUSG00000031378/ENSMUSG00000064354/ENSMUSG00000000290/ENSMUSG00000055447/ENSMUSG00000037902/ENSMUSG00000024397/ENSMUSG00000031266/ENSMUSG00000004040/ENSMUSG00000021270/ENSMUSG00000079685	2	ENSMUSG00000020053/ENSMUSG00000047123
BP	GO:0002922	positive regulation of humoral immune response	5|1102	13|14957	0.00167835	0.02187	ENSMUSG00000030895/ENSMUSG00000022126/ENSMUSG00000022181/ENSMUSG00000055994/ENSMUSG00000037649	Hpx/Acod1/C6/Nod2/H2-DMa	5	4	ENSMUSG00000030895/ENSMUSG00000022126/ENSMUSG00000055994/ENSMUSG00000037649	1	ENSMUSG00000022181
BP	GO:0060263	regulation of respiratory burst	5|1102	13|14957	0.00167835	0.02187	ENSMUSG00000039384/ENSMUSG00000016024/ENSMUSG00000053318/ENSMUSG00000033220/ENSMUSG00000039145	Dusp10/Lbp/Slamf8/Rac2/Camk1d	5	5	ENSMUSG00000039384/ENSMUSG00000016024/ENSMUSG00000053318/ENSMUSG00000033220/ENSMUSG00000039145	0
BP	GO:0070486	leukocyte aggregation	5|1102	13|14957	0.00167835	0.02187	ENSMUSG00000021451/ENSMUSG00000051457/ENSMUSG00000031207/ENSMUSG00000056071/ENSMUSG00000033220	Sema4d/Spn/Msn/S100a9/Rac2	5	5	ENSMUSG00000021451/ENSMUSG00000051457/ENSMUSG00000031207/ENSMUSG00000056071/ENSMUSG00000033220	0
BP	GO:0030100	regulation of endocytosis	34|1102	272|14957	0.00169361	0.0219902	ENSMUSG00000016024/ENSMUSG00000044254/ENSMUSG00000032231/ENSMUSG00000015947/ENSMUSG00000032083/ENSMUSG00000025314/ENSMUSG00000035385/ENSMUSG00000052270/ENSMUSG00000031504/ENSMUSG00000027995/ENSMUSG00000028874/ENSMUSG00000051439/ENSMUSG00000031451/ENSMUSG00000004665/ENSMUSG00000061665/ENSMUSG00000026304/ENSMUSG00000059714/ENSMUSG00000055447/ENSMUSG00000037902/ENSMUSG00000069539/ENSMUSG00000050335/…	Lbp/Pcsk9/Anxa2/Fcgr1/Apoa1/Ptprj/Ccl2/Fpr2/Rab20/Tlr2/Fgr/Cd14/Gas6/Cnn2/Cd2ap/Rab17/Flot1/Cd47/Sirpa/Scyl2/Lgals3/Plcg2/Rab5c/Fcer1g/Hck/Nod2/Rack1/Pycard/Dock2/Ehd4/Stap1/Il2rb/Camk1d/Ahsg	34	29	ENSMUSG00000016024/ENSMUSG00000044254/ENSMUSG00000032231/ENSMUSG00000015947/ENSMUSG00000025314/ENSMUSG00000035385/ENSMUSG00000052270/ENSMUSG00000031504/ENSMUSG00000027995/ENSMUSG00000028874/ENSMUSG00000051439/ENSMUSG00000031451/ENSMUSG00000004665/ENSMUSG00000061665/ENSMUSG00000026304/ENSMUSG00000059714/ENSMUSG00000055447/ENSMUSG00000037902/ENSMUSG00000050335/ENSMUSG00000034330/ENSMUSG00000019173/…	5	ENSMUSG00000032083/ENSMUSG00000069539/ENSMUSG00000020372/ENSMUSG00000029254/ENSMUSG00000022868
BP	GO:0051493	regulation of cytoskeleton organization	55|1102	499|14957	0.00170728	0.0219902	ENSMUSG00000046718/ENSMUSG00000054855/ENSMUSG00000021948/ENSMUSG00000037405/ENSMUSG00000079523/ENSMUSG00000008035/ENSMUSG00000023249/ENSMUSG00000056737/ENSMUSG00000049775/ENSMUSG00000030220/ENSMUSG00000038539/ENSMUSG00000090877/ENSMUSG00000079553/ENSMUSG00000032083/ENSMUSG00000022831/ENSMUSG00000030774/ENSMUSG00000023022/ENSMUSG00000010175/ENSMUSG00000031827/ENSMUSG00000027995/ENSMUSG00000012443/…	Bst2/Rnd1/Prkcd/Icam1/Tmsb10/Mid1ip1/Parp3/Capg/Tmsb4x/Arhgdib/Atf5/Hspa1b/Kifc1/Apoa1/Hcls1/Pak1/Lima1/Prox1/Cotl1/Tlr2/Kif11/Capn1/Fgr/Hspa1a/Pde4dip/Arpc1b/Cd2ap/Myo1f/Rhou/Cd47/Gda/Coro1a/Plek/Braf/Mapk15/Hck/Kif18a/Chek1/Togaram1/Cep70/Cep85/Traf3ip1/Pycard/Myadm/Arhgef5/Bst1/Arhgap18/Stap1/Flna/Ccdc88a/Rhog/Ska1/Chmp4b/Iqgap2/Dbnl	55	45	ENSMUSG00000046718/ENSMUSG00000054855/ENSMUSG00000021948/ENSMUSG00000037405/ENSMUSG00000079523/ENSMUSG00000008035/ENSMUSG00000023249/ENSMUSG00000056737/ENSMUSG00000049775/ENSMUSG00000030220/ENSMUSG00000090877/ENSMUSG00000079553/ENSMUSG00000022831/ENSMUSG00000030774/ENSMUSG00000023022/ENSMUSG00000031827/ENSMUSG00000027995/ENSMUSG00000012443/ENSMUSG00000024942/ENSMUSG00000028874/ENSMUSG00000091971/…	10	ENSMUSG00000038539/ENSMUSG00000032083/ENSMUSG00000010175/ENSMUSG00000038170/ENSMUSG00000002413/ENSMUSG00000035614/ENSMUSG00000037443/ENSMUSG00000034292/ENSMUSG00000029254/ENSMUSG00000021676
BP	GO:0002478	antigen processing and presentation of exogenous peptide antigen	7|1102	25|14957	0.00170915	0.0219902	ENSMUSG00000036908/ENSMUSG00000015947/ENSMUSG00000037321/ENSMUSG00000024308/ENSMUSG00000058715/ENSMUSG00000060586/ENSMUSG00000037649	Unc93b1/Fcgr1/Tap1/Tapbp/Fcer1g/H2-Eb1/H2-DMa	7	7	ENSMUSG00000036908/ENSMUSG00000015947/ENSMUSG00000037321/ENSMUSG00000024308/ENSMUSG00000058715/ENSMUSG00000060586/ENSMUSG00000037649	0
BP	GO:0032480	negative regulation of type I interferon production	7|1102	25|14957	0.00170915	0.0219902	ENSMUSG00000022126/ENSMUSG00000002983/ENSMUSG00000079363/ENSMUSG00000017830/ENSMUSG00000037902/ENSMUSG00000034292/ENSMUSG00000030793	Acod1/Relb/Gbp4/Dhx58/Sirpa/Traf3ip1/Pycard	7	6	ENSMUSG00000022126/ENSMUSG00000002983/ENSMUSG00000079363/ENSMUSG00000017830/ENSMUSG00000037902/ENSMUSG00000030793	1	ENSMUSG00000034292
BP	GO:0090114	COPII-coated vesicle budding	7|1102	25|14957	0.00170915	0.0219902	ENSMUSG00000045294/ENSMUSG00000045302/ENSMUSG00000027429/ENSMUSG00000063704/ENSMUSG00000036391/ENSMUSG00000039234/ENSMUSG00000039367	Insig1/Preb/Sec23b/Mapk15/Sec24a/Sec24d/Sec24c	7	2	ENSMUSG00000045294/ENSMUSG00000063704	5	ENSMUSG00000045302/ENSMUSG00000027429/ENSMUSG00000036391/ENSMUSG00000039234/ENSMUSG00000039367
BP	GO:0002690	positive regulation of leukocyte chemotaxis	14|1102	79|14957	0.00173518	0.0222688	ENSMUSG00000049103/ENSMUSG00000016024/ENSMUSG00000025314/ENSMUSG00000035385/ENSMUSG00000052270/ENSMUSG00000031451/ENSMUSG00000034855/ENSMUSG00000023913/ENSMUSG00000024397/ENSMUSG00000033220/ENSMUSG00000035042/ENSMUSG00000031948/ENSMUSG00000025804/ENSMUSG00000039145	Ccr2/Lbp/Ptprj/Ccl2/Fpr2/Gas6/Cxcl10/Pla2g7/Aif1/Rac2/Ccl5/Kars/Ccr1/Camk1d	14	13	ENSMUSG00000049103/ENSMUSG00000016024/ENSMUSG00000025314/ENSMUSG00000035385/ENSMUSG00000052270/ENSMUSG00000031451/ENSMUSG00000034855/ENSMUSG00000024397/ENSMUSG00000033220/ENSMUSG00000035042/ENSMUSG00000031948/ENSMUSG00000025804/ENSMUSG00000039145	1	ENSMUSG00000023913
BP	GO:0032371	regulation of sterol transport	9|1102	39|14957	0.00174496	0.0222822	ENSMUSG00000017754/ENSMUSG00000032080/ENSMUSG00000044254/ENSMUSG00000032231/ENSMUSG00000032083/ENSMUSG00000015243/ENSMUSG00000028603/ENSMUSG00000032079/ENSMUSG00000023832	Pltp/Apoa4/Pcsk9/Anxa2/Apoa1/Abca1/Scp2/Apoa5/Acat2	9	3	ENSMUSG00000044254/ENSMUSG00000032231/ENSMUSG00000023832	6	ENSMUSG00000017754/ENSMUSG00000032080/ENSMUSG00000032083/ENSMUSG00000015243/ENSMUSG00000028603/ENSMUSG00000032079
BP	GO:0032374	regulation of cholesterol transport	9|1102	39|14957	0.00174496	0.0222822	ENSMUSG00000017754/ENSMUSG00000032080/ENSMUSG00000044254/ENSMUSG00000032231/ENSMUSG00000032083/ENSMUSG00000015243/ENSMUSG00000028603/ENSMUSG00000032079/ENSMUSG00000023832	Pltp/Apoa4/Pcsk9/Anxa2/Apoa1/Abca1/Scp2/Apoa5/Acat2	9	3	ENSMUSG00000044254/ENSMUSG00000032231/ENSMUSG00000023832	6	ENSMUSG00000017754/ENSMUSG00000032080/ENSMUSG00000032083/ENSMUSG00000015243/ENSMUSG00000028603/ENSMUSG00000032079
BP	GO:0009620	response to fungus	8|1102	32|14957	0.00180593	0.023003	ENSMUSG00000057789/ENSMUSG00000031827/ENSMUSG00000027995/ENSMUSG00000028191/ENSMUSG00000030281/ENSMUSG00000032508/ENSMUSG00000056978/ENSMUSG00000032688	Bak1/Cotl1/Tlr2/Bcl10/Il17rc/Myd88/Hamp2/Malt1	8	8	ENSMUSG00000057789/ENSMUSG00000031827/ENSMUSG00000027995/ENSMUSG00000028191/ENSMUSG00000030281/ENSMUSG00000032508/ENSMUSG00000056978/ENSMUSG00000032688	0
BP	GO:0022408	negative regulation of cell-cell adhesion	24|1102	172|14957	0.00182912	0.0232404	ENSMUSG00000031628/ENSMUSG00000042333/ENSMUSG00000021948/ENSMUSG00000038037/ENSMUSG00000031594/ENSMUSG00000021149/ENSMUSG00000035914/ENSMUSG00000032083/ENSMUSG00000018899/ENSMUSG00000051457/ENSMUSG00000024789/ENSMUSG00000016496/ENSMUSG00000031805/ENSMUSG00000039981/ENSMUSG00000050335/ENSMUSG00000044206/ENSMUSG00000078763/ENSMUSG00000001123/ENSMUSG00000068566/ENSMUSG00000020178/ENSMUSG00000026981/…	Casp3/Tnfrsf14/Prkcd/Socs1/Fgl1/Gtpbp4/Cd276/Apoa1/Irf1/Spn/Jak2/Cd274/Jak3/Zc3h12d/Lgals3/Vsig4/Slfn1/Lgals9/Myadm/Adora2a/Il1rn/Tnfaip3/Akna/Gpnmb	24	20	ENSMUSG00000031628/ENSMUSG00000042333/ENSMUSG00000021948/ENSMUSG00000038037/ENSMUSG00000031594/ENSMUSG00000035914/ENSMUSG00000018899/ENSMUSG00000051457/ENSMUSG00000024789/ENSMUSG00000016496/ENSMUSG00000031805/ENSMUSG00000039981/ENSMUSG00000050335/ENSMUSG00000078763/ENSMUSG00000001123/ENSMUSG00000068566/ENSMUSG00000020178/ENSMUSG00000026981/ENSMUSG00000019850/ENSMUSG00000039158	4	ENSMUSG00000021149/ENSMUSG00000032083/ENSMUSG00000044206/ENSMUSG00000029816
BP	GO:0030101	natural killer cell activation	13|1102	71|14957	0.00184474	0.0233805	ENSMUSG00000039217/ENSMUSG00000004043/ENSMUSG00000018899/ENSMUSG00000035247/ENSMUSG00000031451/ENSMUSG00000000290/ENSMUSG00000027347/ENSMUSG00000047123/ENSMUSG00000030707/ENSMUSG00000001123/ENSMUSG00000079685/ENSMUSG00000025188/ENSMUSG00000068227	Il18/Stat5a/Irf1/Hectd1/Gas6/Itgb2/Rasgrp1/Ticam1/Coro1a/Lgals9/Ulbp1/Hps1/Il2rb	13	11	ENSMUSG00000039217/ENSMUSG00000004043/ENSMUSG00000018899/ENSMUSG00000031451/ENSMUSG00000000290/ENSMUSG00000027347/ENSMUSG00000030707/ENSMUSG00000001123/ENSMUSG00000079685/ENSMUSG00000025188/ENSMUSG00000068227	2	ENSMUSG00000035247/ENSMUSG00000047123
BP	GO:0002755	MyD88-dependent toll-like receptor signaling pathway	6|1102	19|14957	0.00185705	0.02342	ENSMUSG00000025498/ENSMUSG00000018899/ENSMUSG00000027995/ENSMUSG00000032508/ENSMUSG00000044827/ENSMUSG00000044583	Irf7/Irf1/Tlr2/Myd88/Tlr1/Tlr7	6	5	ENSMUSG00000025498/ENSMUSG00000018899/ENSMUSG00000027995/ENSMUSG00000032508/ENSMUSG00000044827	1	ENSMUSG00000044583
BP	GO:0050995	negative regulation of lipid catabolic process	6|1102	19|14957	0.00185705	0.02342	ENSMUSG00000026385/ENSMUSG00000042010/ENSMUSG00000042429/ENSMUSG00000021340/ENSMUSG00000011305/ENSMUSG00000045502	Dbi/Acacb/Adora1/Gpld1/Plin5/Hcar2	6	4	ENSMUSG00000026385/ENSMUSG00000042010/ENSMUSG00000042429/ENSMUSG00000045502	2	ENSMUSG00000021340/ENSMUSG00000011305
BP	GO:0030258	lipid modification	27|1102	202|14957	0.00187079	0.023535	ENSMUSG00000026385/ENSMUSG00000055782/ENSMUSG00000032080/ENSMUSG00000027261/ENSMUSG00000038037/ENSMUSG00000028517/ENSMUSG00000032083/ENSMUSG00000032038/ENSMUSG00000037071/ENSMUSG00000042010/ENSMUSG00000032047/ENSMUSG00000031378/ENSMUSG00000038174/ENSMUSG00000034780/ENSMUSG00000024525/ENSMUSG00000023913/ENSMUSG00000031570/ENSMUSG00000028167/ENSMUSG00000059447/ENSMUSG00000021751/ENSMUSG00000011305/…	Dbi/Abcd2/Apoa4/Hao1/Socs1/Plpp3/Apoa1/St3gal4/Scd1/Acacb/Acat1/Abcd1/Fam126b/B3galt1/Impa2/Pla2g7/Plpp5/Bdh2/Hadhb/Acox2/Plin5/Phyh/Slc35c1/Apoa5/Inpp5f/Slc27a2/Acat2	27	9	ENSMUSG00000026385/ENSMUSG00000055782/ENSMUSG00000038037/ENSMUSG00000037071/ENSMUSG00000042010/ENSMUSG00000031378/ENSMUSG00000024525/ENSMUSG00000028167/ENSMUSG00000023832	18	ENSMUSG00000032080/ENSMUSG00000027261/ENSMUSG00000028517/ENSMUSG00000032083/ENSMUSG00000032038/ENSMUSG00000032047/ENSMUSG00000038174/ENSMUSG00000034780/ENSMUSG00000023913/ENSMUSG00000031570/ENSMUSG00000059447/ENSMUSG00000021751/ENSMUSG00000011305/ENSMUSG00000026664/ENSMUSG00000049922/ENSMUSG00000032079/ENSMUSG00000042105/ENSMUSG00000027359
BP	GO:0034404	nucleobase-containing small molecule biosynthetic process	22|1102	153|14957	0.0018905	0.0237244	ENSMUSG00000013629/ENSMUSG00000017390/ENSMUSG00000032478/ENSMUSG00000028671/ENSMUSG00000020407/ENSMUSG00000115338/ENSMUSG00000000628/ENSMUSG00000032047/ENSMUSG00000031378/ENSMUSG00000036067/ENSMUSG00000032294/ENSMUSG00000023960/ENSMUSG00000020053/ENSMUSG00000025877/ENSMUSG00000023019/ENSMUSG00000041237/ENSMUSG00000025236/ENSMUSG00000004040/ENSMUSG00000037012/ENSMUSG00000021196/ENSMUSG00000031360/…	Cad/Aldoc/Nme6/Gale/Upp1/Pnp/Hk2/Acat1/Abcd1/Slc2a6/Pkm/Enpp5/Igf1/Hk3/Gpd1/Pklr/Adpgk/Stat3/Hk1/Pfkp/Ctps2/Gck	22	14	ENSMUSG00000017390/ENSMUSG00000028671/ENSMUSG00000020407/ENSMUSG00000115338/ENSMUSG00000000628/ENSMUSG00000031378/ENSMUSG00000036067/ENSMUSG00000032294/ENSMUSG00000023960/ENSMUSG00000025877/ENSMUSG00000004040/ENSMUSG00000037012/ENSMUSG00000021196/ENSMUSG00000031360	8	ENSMUSG00000013629/ENSMUSG00000032478/ENSMUSG00000032047/ENSMUSG00000020053/ENSMUSG00000023019/ENSMUSG00000041237/ENSMUSG00000025236/ENSMUSG00000041798
BP	GO:0002437	inflammatory response to antigenic stimulus	10|1102	47|14957	0.00190222	0.0237544	ENSMUSG00000037405/ENSMUSG00000015947/ENSMUSG00000051457/ENSMUSG00000045827/ENSMUSG00000054717/ENSMUSG00000027347/ENSMUSG00000058715/ENSMUSG00000041323/ENSMUSG00000055994/ENSMUSG00000030751	Icam1/Fcgr1/Spn/Serpinb9/Hmgb2/Rasgrp1/Fcer1g/Ak7/Nod2/Psma1	10	10	ENSMUSG00000037405/ENSMUSG00000015947/ENSMUSG00000051457/ENSMUSG00000045827/ENSMUSG00000054717/ENSMUSG00000027347/ENSMUSG00000058715/ENSMUSG00000041323/ENSMUSG00000055994/ENSMUSG00000030751	0
BP	GO:0070265	necrotic cell death	10|1102	47|14957	0.00190222	0.0237544	ENSMUSG00000012519/ENSMUSG00000057963/ENSMUSG00000024778/ENSMUSG00000032000/ENSMUSG00000064354/ENSMUSG00000071369/ENSMUSG00000060733/ENSMUSG00000002661/ENSMUSG00000031639/ENSMUSG00000025888	Mlkl/Itpk1/Fas/Birc3/mt-Co2/Map3k5/Ipmk/Alkbh7/Tlr3/Casp1	10	9	ENSMUSG00000012519/ENSMUSG00000057963/ENSMUSG00000024778/ENSMUSG00000032000/ENSMUSG00000064354/ENSMUSG00000060733/ENSMUSG00000002661/ENSMUSG00000031639/ENSMUSG00000025888	1	ENSMUSG00000071369
BP	GO:0097193	intrinsic apoptotic signaling pathway	34|1102	274|14957	0.00191558	0.0238628	ENSMUSG00000031628/ENSMUSG00000002083/ENSMUSG00000025647/ENSMUSG00000021208/ENSMUSG00000036986/ENSMUSG00000057789/ENSMUSG00000025130/ENSMUSG00000027490/ENSMUSG00000053175/ENSMUSG00000024789/ENSMUSG00000115338/ENSMUSG00000025887/ENSMUSG00000030341/ENSMUSG00000056071/ENSMUSG00000071369/ENSMUSG00000004951/ENSMUSG00000027230/ENSMUSG00000022564/ENSMUSG00000032115/ENSMUSG00000024807/ENSMUSG00000102037/…	Casp3/Bbc3/Shisa5/Ifi27l2b/Pml/Bak1/P4hb/E2f1/Bcl3/Jak2/Pnp/Casp12/Tnfrsf1a/S100a9/Map3k5/Hspb1/Creb3l1/Grina/Hyou1/Syvn1/Bcl2a1a/Wfs1/Bub1/E2f2/Ern1/Plscr1/Rack1/Mcl1/Pycard/Cep63/Ivns1abp/Ppp1r13b/Dnajc10/Prkra	34	25	ENSMUSG00000031628/ENSMUSG00000002083/ENSMUSG00000025647/ENSMUSG00000021208/ENSMUSG00000036986/ENSMUSG00000057789/ENSMUSG00000027490/ENSMUSG00000053175/ENSMUSG00000024789/ENSMUSG00000115338/ENSMUSG00000025887/ENSMUSG00000030341/ENSMUSG00000056071/ENSMUSG00000004951/ENSMUSG00000027230/ENSMUSG00000022564/ENSMUSG00000102037/ENSMUSG00000027379/ENSMUSG00000018983/ENSMUSG00000032369/ENSMUSG00000038612/…	9	ENSMUSG00000025130/ENSMUSG00000071369/ENSMUSG00000032115/ENSMUSG00000024807/ENSMUSG00000039474/ENSMUSG00000020715/ENSMUSG00000020372/ENSMUSG00000032534/ENSMUSG00000023150
BP	GO:0006749	glutathione metabolic process	11|1102	55|14957	0.00195099	0.0241269	ENSMUSG00000032350/ENSMUSG00000058135/ENSMUSG00000058216/ENSMUSG00000068762/ENSMUSG00000025934/ENSMUSG00000057933/ENSMUSG00000038155/ENSMUSG00000028690/ENSMUSG00000027890/ENSMUSG00000025950/ENSMUSG00000030004	Gclc/Gstm1/Gstp3/Gstm6/Gsta3/Gsta2/Gstp2/Mmachc/Gstm4/Idh1/Nat8	11	8	ENSMUSG00000032350/ENSMUSG00000058135/ENSMUSG00000068762/ENSMUSG00000025934/ENSMUSG00000057933/ENSMUSG00000038155/ENSMUSG00000027890/ENSMUSG00000025950	3	ENSMUSG00000058216/ENSMUSG00000028690/ENSMUSG00000030004
BP	GO:0070972	protein localization to endoplasmic reticulum	11|1102	55|14957	0.00195099	0.0241269	ENSMUSG00000045294/ENSMUSG00000030082/ENSMUSG00000079111/ENSMUSG00000020780/ENSMUSG00000036323/ENSMUSG00000019802/ENSMUSG00000032042/ENSMUSG00000027828/ENSMUSG00000025935/ENSMUSG00000003378/ENSMUSG00000038467	Insig1/Sec61a1/Kdelr2/Srp68/Srp72/Sec63/Srpr/Ssr3/Tram1/Grik5/Chmp4b	11	2	ENSMUSG00000045294/ENSMUSG00000038467	9	ENSMUSG00000030082/ENSMUSG00000079111/ENSMUSG00000020780/ENSMUSG00000036323/ENSMUSG00000019802/ENSMUSG00000032042/ENSMUSG00000027828/ENSMUSG00000025935/ENSMUSG00000003378
BP	GO:2000401	regulation of lymphocyte migration	11|1102	55|14957	0.00195099	0.0241269	ENSMUSG00000042333/ENSMUSG00000049103/ENSMUSG00000027009/ENSMUSG00000051457/ENSMUSG00000031207/ENSMUSG00000034855/ENSMUSG00000024397/ENSMUSG00000035042/ENSMUSG00000030793/ENSMUSG00000001123/ENSMUSG00000032754	Tnfrsf14/Ccr2/Itga4/Spn/Msn/Cxcl10/Aif1/Ccl5/Pycard/Lgals9/Slc8b1	11	11	ENSMUSG00000042333/ENSMUSG00000049103/ENSMUSG00000027009/ENSMUSG00000051457/ENSMUSG00000031207/ENSMUSG00000034855/ENSMUSG00000024397/ENSMUSG00000035042/ENSMUSG00000030793/ENSMUSG00000001123/ENSMUSG00000032754	0
BP	GO:0042866	pyruvate biosynthetic process	14|1102	80|14957	0.00196377	0.0241888	ENSMUSG00000017390/ENSMUSG00000028671/ENSMUSG00000000628/ENSMUSG00000036067/ENSMUSG00000032294/ENSMUSG00000020053/ENSMUSG00000025877/ENSMUSG00000023019/ENSMUSG00000041237/ENSMUSG00000025236/ENSMUSG00000004040/ENSMUSG00000037012/ENSMUSG00000021196/ENSMUSG00000041798	Aldoc/Gale/Hk2/Slc2a6/Pkm/Igf1/Hk3/Gpd1/Pklr/Adpgk/Stat3/Hk1/Pfkp/Gck	14	9	ENSMUSG00000017390/ENSMUSG00000028671/ENSMUSG00000000628/ENSMUSG00000036067/ENSMUSG00000032294/ENSMUSG00000025877/ENSMUSG00000004040/ENSMUSG00000037012/ENSMUSG00000021196	5	ENSMUSG00000020053/ENSMUSG00000023019/ENSMUSG00000041237/ENSMUSG00000025236/ENSMUSG00000041798
BP	GO:1905952	regulation of lipid localization	19|1102	125|14957	0.00196549	0.0241888	ENSMUSG00000017754/ENSMUSG00000021948/ENSMUSG00000025044/ENSMUSG00000032080/ENSMUSG00000044254/ENSMUSG00000032231/ENSMUSG00000032083/ENSMUSG00000042010/ENSMUSG00000015243/ENSMUSG00000028603/ENSMUSG00000032540/ENSMUSG00000002661/ENSMUSG00000026615/ENSMUSG00000048486/ENSMUSG00000078683/ENSMUSG00000011305/ENSMUSG00000032079/ENSMUSG00000020427/ENSMUSG00000023832	Pltp/Prkcd/Msr1/Apoa4/Pcsk9/Anxa2/Apoa1/Acacb/Abca1/Scp2/Abhd5/Alkbh7/Eprs/Fitm2/Mup1/Plin5/Apoa5/Igfbp3/Acat2	19	7	ENSMUSG00000021948/ENSMUSG00000025044/ENSMUSG00000044254/ENSMUSG00000032231/ENSMUSG00000042010/ENSMUSG00000002661/ENSMUSG00000023832	12	ENSMUSG00000017754/ENSMUSG00000032080/ENSMUSG00000032083/ENSMUSG00000015243/ENSMUSG00000028603/ENSMUSG00000032540/ENSMUSG00000026615/ENSMUSG00000048486/ENSMUSG00000078683/ENSMUSG00000011305/ENSMUSG00000032079/ENSMUSG00000020427
BP	GO:0043903	regulation of symbiosis, encompassing mutualism through parasitism	25|1102	183|14957	0.00200179	0.0245762	ENSMUSG00000020914/ENSMUSG00000046718/ENSMUSG00000068220/ENSMUSG00000025492/ENSMUSG00000036986/ENSMUSG00000052776/ENSMUSG00000026542/ENSMUSG00000032231/ENSMUSG00000025130/ENSMUSG00000009585/ENSMUSG00000026104/ENSMUSG00000029561/ENSMUSG00000010175/ENSMUSG00000035692/ENSMUSG00000060591/ENSMUSG00000029826/ENSMUSG00000019810/ENSMUSG00000032383/ENSMUSG00000063268/ENSMUSG00000032369/ENSMUSG00000035042/…	Top2a/Bst2/Lgals1/Ifitm3/Pml/Oas1a/Apcs/Anxa2/P4hb/Apobec3/Stat1/Oasl2/Prox1/Isg15/Ifitm2/Zc3hav1/Fuca2/Ppib/Parp10/Plscr1/Ccl5/Oas3/Pabpc1/Ddb1/Chmp4b	25	20	ENSMUSG00000020914/ENSMUSG00000046718/ENSMUSG00000068220/ENSMUSG00000025492/ENSMUSG00000036986/ENSMUSG00000052776/ENSMUSG00000026542/ENSMUSG00000032231/ENSMUSG00000009585/ENSMUSG00000026104/ENSMUSG00000029561/ENSMUSG00000035692/ENSMUSG00000060591/ENSMUSG00000029826/ENSMUSG00000019810/ENSMUSG00000063268/ENSMUSG00000032369/ENSMUSG00000035042/ENSMUSG00000032661/ENSMUSG00000038467	5	ENSMUSG00000025130/ENSMUSG00000010175/ENSMUSG00000032383/ENSMUSG00000022283/ENSMUSG00000024740
BP	GO:0097696	STAT cascade	18|1102	116|14957	0.00201828	0.0247191	ENSMUSG00000030895/ENSMUSG00000034422/ENSMUSG00000039217/ENSMUSG00000038037/ENSMUSG00000026104/ENSMUSG00000040033/ENSMUSG00000004043/ENSMUSG00000022831/ENSMUSG00000018899/ENSMUSG00000053175/ENSMUSG00000024789/ENSMUSG00000030341/ENSMUSG00000031805/ENSMUSG00000020053/ENSMUSG00000004040/ENSMUSG00000035042/ENSMUSG00000034292/ENSMUSG00000042105	Hpx/Parp14/Il18/Socs1/Stat1/Stat2/Stat5a/Hcls1/Irf1/Bcl3/Jak2/Tnfrsf1a/Jak3/Igf1/Stat3/Ccl5/Traf3ip1/Inpp5f	18	15	ENSMUSG00000030895/ENSMUSG00000034422/ENSMUSG00000039217/ENSMUSG00000038037/ENSMUSG00000026104/ENSMUSG00000040033/ENSMUSG00000004043/ENSMUSG00000022831/ENSMUSG00000018899/ENSMUSG00000053175/ENSMUSG00000024789/ENSMUSG00000030341/ENSMUSG00000031805/ENSMUSG00000004040/ENSMUSG00000035042	3	ENSMUSG00000020053/ENSMUSG00000034292/ENSMUSG00000042105
BP	GO:0002702	positive regulation of production of molecular mediator of immune response	15|1102	89|14957	0.00203198	0.0248272	ENSMUSG00000030895/ENSMUSG00000026072/ENSMUSG00000042333/ENSMUSG00000039217/ENSMUSG00000041471/ENSMUSG00000027995/ENSMUSG00000024990/ENSMUSG00000040296/ENSMUSG00000031101/ENSMUSG00000047123/ENSMUSG00000058715/ENSMUSG00000055994/ENSMUSG00000037012/ENSMUSG00000031948/ENSMUSG00000032688	Hpx/Il1r1/Tnfrsf14/Il18/Shld2/Tlr2/Rbp4/Ddx58/Sash3/Ticam1/Fcer1g/Nod2/Hk1/Kars/Malt1	15	11	ENSMUSG00000030895/ENSMUSG00000042333/ENSMUSG00000039217/ENSMUSG00000027995/ENSMUSG00000040296/ENSMUSG00000031101/ENSMUSG00000058715/ENSMUSG00000055994/ENSMUSG00000037012/ENSMUSG00000031948/ENSMUSG00000032688	4	ENSMUSG00000026072/ENSMUSG00000041471/ENSMUSG00000024990/ENSMUSG00000047123
[truncated: 195 more rows]

## Sheet: GO S_CvsAKO
Category	GOID	Description	GeneRatio	BgRatio	pvalue	padj	geneID	geneName	Count	Up	Up_Gene_id	Down	Down_Gene_id
[truncated: 1,086 more rows]

## Sheet: KEGG L_ATsEVc vs ATsEVKO
KEGGID	Description	GeneRatio	BgRatio	pvalue	padj	geneID	geneName	keggID	Count	Up	Up_Gene_id	Down	Down_Gene_id
[truncated: 12 more rows]

## Sheet: KEGG S_CvsAKO
KEGGID	Description	GeneRatio	BgRatio	pvalue	padj	geneID	geneName	keggID	Count	Up	Up_Gene_id	Down	Down_Gene_id
[truncated: 35 more rows]

## Sheet: Reactome L_ATsEVc vs ATsEVAKO
ReactomeID	Description	GeneRatio	BgRatio	pvalue	padj	geneID	geneName	EntrezID	Count	Up	Up_Gene_id	Down	Down_Gene_id
[truncated: 19 more rows]

## Sheet: Reactome S_Cvs AKO
ReactomeID	Description	GeneRatio	BgRatio	pvalue	padj	geneID	geneName	EntrezID	Count	Up	Up_Gene_id	Down	Down_Gene_id
[truncated: 57 more rows]
